# Supplementary material
Source: publisher site journal article supplement (https://www.spandidos-publications.com/7281/downloadSupplementary)
Supplement: Supplementary file 1 [file downloadSupplementary]

## Sheet: Supplementary Table2
Table SII. Identified modification sites and proteins.
Modification sites information																		Protein quantitation						Normalized modification sites quantitation
Accession no.	Position	Amino acid	Protein	Gene name	Localization probability	PEP	Score	Charge	Modified sequence	Mass error, ppm	MS/MS count	Relative intensity Vector_1	Relative intensity Vector_2	Relative intensity Vector_3	Relative intensity SLC4A7_1	Relative intensity SLC4A7_2	Relative intensity SLC4A7_3	Relative intensity Vector_1	Relative intensity Vector_2	Relative intensity Vector_3	Relative intensity SLC4A7_1	Relative intensity SLC4A7_2	Relative intensity SLC4A7_3	Normalized relative intensity Vector_1	Normalized relative intensity Vector_2	Normalized relative intensity Vector_3	Normalized relative intensity SLC4A7_1	Normalized relative intensity SLC4A7_2	Normalized relative intensity SLC4A7_3	SLC4A7/vector ratio	SLC4A7/vector P-value
A0A1B0GTU1	665	K	Zinc finger CCCH domain-containing protein 11B OS=Homo sapiens OX=9606 GN=ZC3H11B PE=4 SV=1	ZC3H11B	1	0.000927514	88.921	2	VVSSPK(1)LAPK	0.43968	9		0.882236	1.30341		0.796816	1.01753
A1IGU5	267	K	Rho guanine nucleotide exchange factor 37 OS=Homo sapiens OX=9606 GN=ARHGEF37 PE=2 SV=2	ARHGEF37	1	0.00257812	56.202	3	TEDK(1)EFDDLEER	6.819	3			0.756028		1.03466	1.20931
A5YKK6	808	K	CCR4-NOT transcription complex subunit 1 OS=Homo sapiens OX=9606 GN=CNOT1 PE=1 SV=2	CNOT1	1	1.69966e-44	227.47	2	K(1)LGTSGLNQPTFQQSK	-1.3192	6	1.34151	0.836186	0.700789	1.09415	1.00519	1.02218	0.916334	1.03853	1.01845	0.963002	1.02304	1.04065	1.464	0.805	0.688	1.136	0.983	0.982	1.049	0.690629
A6NCL7	448	K	Ankyrin repeat domain-containing protein 33B OS=Homo sapiens OX=9606 GN=ANKRD33B PE=3 SV=1	ANKRD33B	1	0.022829	44.045	3	GSTK(1)DSGHLQIPK(1)WRYK(1)EAK	8.4098	1						1
A6NCL7	457	K	Ankyrin repeat domain-containing protein 33B OS=Homo sapiens OX=9606 GN=ANKRD33B PE=3 SV=1	ANKRD33B	1	0.022829	44.045	3	GSTK(1)DSGHLQIPK(1)WRYK(1)EAK	8.4098	1						1
A6NCL7	461	K	Ankyrin repeat domain-containing protein 33B OS=Homo sapiens OX=9606 GN=ANKRD33B PE=3 SV=1	ANKRD33B	1	0.022829	44.045	3	GSTK(1)DSGHLQIPK(1)WRYK(1)EAK	8.4098	1						1
A6NF01	91	K	Putative nuclear envelope pore membrane protein POM 121B OS=Homo sapiens OX=9606 GN=POM121B PE=5 SV=2	POM121B	1	0.000735775	142.36	2	K(1)VQLLPSR	-0.64738	6	1.17266	1.02239	0.891417	1.50968	0.806224	0.597625
P68363	401	K	Tubulin alpha-1B chain OS=Homo sapiens OX=9606 GN=TUBA1B PE=1 SV=1	TUBA1B	1	0.0083979	63.301	2	FDLMYAK(1)R	1.2345	2	1.0689	0.931097
A6NHR9	1987	K	Structural maintenance of chromosomes flexible hinge domain-containing protein 1 OS=Homo sapiens OX=9606 GN=SMCHD1 PE=1 SV=2	SMCHD1	1	0.00223085	76.572	2	VETTDCPVPPK(1)R	-0.26658	2			0.614117	1.38588			0.928365	0.928692	0.966446	1.07379	1.05609	1.04662			0.635	1.291			2.033
P62308	3	K	Small nuclear ribonucleoprotein G OS=Homo sapiens OX=9606 GN=SNRPG PE=1 SV=1	SNRPG	1	0.0027716	81.335	2	SK(1)AHPPELK	-0.36785	5	0.884222	1.09721	0.951967	1.05522	1.01138
E9PRG8	109	K	Uncharacterized protein C11orf98 OS=Homo sapiens OX=9606 GN=C11orf98 PE=4 SV=2	C11orf98	1	0.0189596	53.028	2	TK(1)APQDVEMK	1.1063	2			0.860572	1.13943			1.20116	1.01268	0.95349	1.0486	0.892606	0.89147			0.903	1.087			1.204
E9PRG8	103	K	Uncharacterized protein C11orf98 OS=Homo sapiens OX=9606 GN=C11orf98 PE=4 SV=2	C11orf98	1	0.0565032	46.835	2	TSEPQLK(1)R	-0.45152	1				1			1.20116	1.01268	0.95349	1.0486	0.892606	0.89147				0.954
O00139	102	K	Kinesin-like protein KIF2A OS=Homo sapiens OX=9606 GN=KIF2A PE=1 SV=3	KIF2A	1	8.64862e-05	105.94	2	TVASIK(1)NDPPSR	0.79565	6	0.839664	1.09867	0.983037	1.02447	1.02966	1.02451	1.03025	0.941292	0.956364	1.09116	0.956933	1.024	0.815	1.167	1.028	0.939	1.076	1	1.002	0.927026
O00148	35	K	ATP-dependent RNA helicase DDX39A OS=Homo sapiens OX=9606 GN=DDX39A PE=1 SV=2	DDX39A	1	4.55868e-11	167.59	2	DIK(1)GSYVSIHSSGFR	0.2863	11	1.26157	1.01766	0.73294	1.63599	0.600477	0.751367	0.909976	1.05551	1.0333	0.898487	1.03188	1.07085	1.386	0.964	0.709	1.821	0.582	0.702	1.015	0.851297
O00148	333	K	ATP-dependent RNA helicase DDX39A OS=Homo sapiens OX=9606 GN=DDX39A PE=1 SV=2	DDX39A	1	0.000270548	91.783	2	YQQFK(1)DFQR	0.46416	5		1.15651	0.912997	1.18395	0.817425	0.929115	0.909976	1.05551	1.0333	0.898487	1.03188	1.07085		1.096	0.884	1.318	0.792	0.868	1.003	0.942439
O00151	246	K	PDZ and LIM domain protein 1 OS=Homo sapiens OX=9606 GN=PDLIM1 PE=1 SV=4	PDLIM1	1	9.69557e-23	210.4	2	APVTK(1)VAASIGNAQK	0.36252	6	0.731918	1.05221	0.827468	1.15009	1.1991	1.03922	0.931557	1.02203	0.879104	1.04795	1.12096	0.998399	0.786	1.03	0.941	1.097	1.07	1.041	1.164	0.123384
O00151	103	K	PDZ and LIM domain protein 1 OS=Homo sapiens OX=9606 GN=PDLIM1 PE=1 SV=4	PDLIM1	1	2.67785e-16	125.75	4	HPYK(1)MNLASEPQEVLHIGSAHNR	-0.15638	6	0.879704	1.00623	0.749314	1.34502	1.08757	0.932161	0.931557	1.02203	0.879104	1.04795	1.12096	0.998399	0.944	0.985	0.852	1.283	0.97	0.934	1.146	0.306035
O00151	98	K	PDZ and LIM domain protein 1 OS=Homo sapiens OX=9606 GN=PDLIM1 PE=1 SV=4	PDLIM1	1	1.73262e-05	118.91	2	VWSPLVTEEGK(1)R	-1.0725	6	1.17115	0.705351	0.539531	1.61527	1.0382	0.9305	0.931557	1.02203	0.879104	1.04795	1.12096	0.998399	1.257	0.69	0.614	1.541	0.926	0.932	1.327	0.335305
O00170	112	K	AH receptor-interacting protein OS=Homo sapiens OX=9606 GN=AIP PE=1 SV=2	AIP	1	0.000275081	84.999	2	NIAVGK(1)DPLEGQR	-0.0042463	6	1.03222	1.14799	0.850931	1.07409	1.00773	0.887046	0.959726	0.985467	0.999613	1.00333	0.979051	1.07282	1.076	1.165	0.851	1.071	1.029	0.827	0.947	0.693671
O00193	91	K	Small acidic protein OS=Homo sapiens OX=9606 GN=SMAP PE=1 SV=1	SMAP	1	1.36311e-61	250.08	3	KINEELESQYQQSMDSK(1)LSGR	0.10227	13	1.84683	0.967277	0.379346	2.02622	0.421359	0.358967	0.970432	0.769219	1.25727	0.832646	1.02127	1.14916	1.903	1.257	0.302	2.433	0.413	0.312	0.912	0.760087
O00193	62	K	Small acidic protein OS=Homo sapiens OX=9606 GN=SMAP PE=1 SV=1	SMAP	1	1.54694e-18	185.18	2	LVIGDHK(1)STSHFR	-0.48118	12	0.925882	1.03981	0.962717	1.09602	0.932132	1.04345	0.970432	0.769219	1.25727	0.832646	1.02127	1.14916	0.954	1.352	0.766	1.316	0.913	0.908	1.021	0.880328
O00232	301	K	26S proteasome non-ATPase regulatory subunit 12 OS=Homo sapiens OX=9606 GN=PSMD12 PE=1 SV=3	PSMD12	1	0.0105911	56.014	2	LEEIPK(1)YK	-0.12605	4			1.10579	1.03945	0.859075	0.995688	0.986144	1.05714	1.02065	1.01147	0.971381	0.953213			1.083	1.028	0.884	1.045	0.91
O00233	123	K	26S proteasome non-ATPase regulatory subunit 9 OS=Homo sapiens OX=9606 GN=PSMD9 PE=1 SV=3	PSMD9	1	9.09811e-06	127.93	2	K(1)LGQSESQGPPR	-0.63109	6	0.88575	1.06409	0.898684	1.15786	1.00381	0.989804	0.954766	1.0004	1.01855	1.00592	1.02563	0.994729	0.928	1.064	0.882	1.151	0.979	0.995	1.087	0.330338
O00244	57	K	Copper transport protein ATOX1 OS=Homo sapiens OX=9606 GN=ATOX1 PE=1 SV=1	ATOX1	0.961051	4.24957e-05	101.82	2	K(0.961)TGK(0.039)TVSYLGLE	-1.2191	4	1.35087		1.01014	1.04196	0.597035		0.992021	0.999472	1.05531	0.919429	1.02988	1.00389	1.362		0.957	1.133	0.58		0.739	0.461063
O00268	817	K	Transcription initiation factor TFIID subunit 4 OS=Homo sapiens OX=9606 GN=TAF4 PE=1 SV=2	TAF4	1	3.50542e-22	179.98	2	ALSAVSAQAAAAQK(1)NK	1.5584	4			0.936606	1.56328	1.04216	0.457962	0.937717	1.01334	1.04979	0.960571		1.03858			0.892	1.627		0.441	1.159
O00273	324	K	DNA fragmentation factor subunit alpha OS=Homo sapiens OX=9606 GN=DFFA PE=1 SV=1	DFFA	1	0.0467663	40.533	2	ASPPGDLQNPK(1)R	-0.89578	1						1	1.18066	0.879678	0.97021	1.07566	0.931186	0.9626						1.039
O00273	313	K	DNA fragmentation factor subunit alpha OS=Homo sapiens OX=9606 GN=DFFA PE=1 SV=1	DFFA	1	3.92534e-23	197.79	2	SISASK(1)ASPPGDLQNPK	-0.50169	9	1.29125	0.921213	0.780444	1.23513	0.836312	0.935658	1.18066	0.879678	0.97021	1.07566	0.931186	0.9626	1.094	1.047	0.804	1.148	0.898	0.972	1.025	0.826634
O00399	182	K	Dynactin subunit 6 OS=Homo sapiens OX=9606 GN=DCTN6 PE=1 SV=1	DCTN6	1	0.0630381	40.386	2	TMK(1)GSSTPVK	-0.88838	1						1	1.01882	0.972054	0.927999	1.01725	1.02035	1.04353						0.958
O00429	597	K	Dynamin-1-like protein OS=Homo sapiens OX=9606 GN=DNM1L PE=1 SV=2	DNM1L	1	7.71186e-05	84.309	2	TSK(1)AEELLAEEK	0.39539	4		0.879207	0.569194	1.80515		0.746451	1.00924	0.962765	0.954499	0.986979	1.02361	1.0629		0.913	0.596	1.829		0.702	1.677	0.498876
O00499	13	K	Myc box-dependent-interacting protein 1 OS=Homo sapiens OX=9606 GN=BIN1 PE=1 SV=1	BIN1	1	9.41282e-07	115.41	2	GVTAGK(1)IASNVQK	-0.14465	6	1.00419	0.974758	0.966271	0.867261	1.09754	1.08998	0.903494	0.943733	0.962002	1.00961	1.04191	1.13925	1.111	1.033	1.004	0.859	1.053	0.957	0.911	0.222658
O00506	335	K	Serine/threonine-protein kinase 25 OS=Homo sapiens OX=9606 GN=STK25 PE=1 SV=1	STK25	0.999851	9.62553e-08	58.794	3	LHK(1)GTALHSSQKPAEPVK	0.11717	6	1.08007	0.930514	0.992444	1.09222	0.903468	1.00128
O00515	6	K	Ladinin-1 OS=Homo sapiens OX=9606 GN=LAD1 PE=1 SV=2	LAD1	1	8.93483e-05	125.17	2	K(1)DWSALSSLAR	-0.049833	6	0.89711	1.1323	0.876588	1.2734	0.935815	0.884787	0.97585	1.05714	1.02732	1.03808	0.966245	0.935364	0.919	1.071	0.853	1.227	0.969	0.946	1.105	0.412407
O00515	382	K	Ladinin-1 OS=Homo sapiens OX=9606 GN=LAD1 PE=1 SV=2	LAD1	1	0.00153227	87.942	2	K(1)ENSETTLTR	0.41134	2		1.01802		0.98198			0.97585	1.05714	1.02732	1.03808	0.966245	0.935364		0.963		0.946			0.982
O00515	259	K	Ladinin-1 OS=Homo sapiens OX=9606 GN=LAD1 PE=1 SV=2	LAD1	1	0.000352319	101.48	2	LVSEK(1)ASIFEK	0.35753	6	0.958297	1.14609	0.868424	1.05569	1.04851	0.922983	0.97585	1.05714	1.02732	1.03808	0.966245	0.935364	0.982	1.084	0.845	1.017	1.085	0.987	1.061	0.457506
O00515	199	K	Ladinin-1 OS=Homo sapiens OX=9606 GN=LAD1 PE=1 SV=2	LAD1	1	0.0330059	65.879	2	SLVSDK(1)TSISEK	-1.2104	1		1					0.97585	1.05714	1.02732	1.03808	0.966245	0.935364		0.946
O00515	235	K	Ladinin-1 OS=Homo sapiens OX=9606 GN=LAD1 PE=1 SV=2	LAD1	1	0.000356889	71.066	2	SVLEK(1)TSVSEK	1.4333	3		1.06058		1.00138	0.938037		0.97585	1.05714	1.02732	1.03808	0.966245	0.935364		1.003		0.965	0.971		0.965
O00541	441	K	Pescadillo homolog OS=Homo sapiens OX=9606 GN=PES1 PE=1 SV=1	PES1	1	0.000539466	131.3	2	LK(1)LLALQR	0.0093547	6	1.08472	1.02094	0.995625	1.19054	0.939322	0.768853	1.0959	0.910946	1.01222	1.00498	0.996197	0.979757	0.99	1.121	0.984	1.185	0.943	0.785	0.941	0.594612
O00541	517	K	Pescadillo homolog OS=Homo sapiens OX=9606 GN=PES1 PE=1 SV=1	PES1	1	0.00658285	62.271	2	VMAGTLK(1)LEDK	0.08359	3		1.27792		0.880912	0.841164		1.0959	0.910946	1.01222	1.00498	0.996197	0.979757		1.403		0.877	0.844		0.613
O00567	578	K	Nucleolar protein 56 OS=Homo sapiens OX=9606 GN=NOP56 PE=1 SV=4	NOP56	1	1.02851e-10	91.032	2	EEPVSSGPEEAVGK(1)SSSK	-2.0726	1	1						1.08059	0.929254	0.984214	1.06525	0.953735	0.986954	0.925
O00571	55	K	ATP-dependent RNA helicase DDX3X OS=Homo sapiens OX=9606 GN=DDX3X PE=1 SV=3	DDX3X	1	1.31238e-10	121.69	2	GFYDK(1)DSSGWSSSK	0.032209	6	0.976976	1.00898	0.855277	1.41306	0.811395	0.93431	0.927049	1.02332	1.07561	0.865963	0.992934	1.11512	1.054	0.986	0.795	1.632	0.817	0.838	1.159	0.698876
O00571	81	K	ATP-dependent RNA helicase DDX3X OS=Homo sapiens OX=9606 GN=DDX3X PE=1 SV=3	DDX3X	1	0.00621053	76.605	2	GK(1)SSFFSDR	-0.11972	5	0.866801		1.01264	1.03735	0.958348	1.12486	0.927049	1.02332	1.07561	0.865963	0.992934	1.11512	0.935		0.941	1.198	0.965	1.009	1.127	0.26855
O00571	118	K	ATP-dependent RNA helicase DDX3X OS=Homo sapiens OX=9606 GN=DDX3X PE=1 SV=3	DDX3X	1	0.00254843	94.806	2	SGFGK(1)FER	0.5738	5	0.907931	1.17294		0.920042	0.85866	1.14043	0.927049	1.02332	1.07561	0.865963	0.992934	1.11512	0.979	1.146		1.062	0.865	1.023	0.925	0.492627
O14530	50	K	Thioredoxin domain-containing protein 9 OS=Homo sapiens OX=9606 GN=TXNDC9 PE=1 SV=2	TXNDC9	1	0.0834392	67.903	2	EK(1)RLQALR	6.4855	1					1		0.886205	1.07715	1.12345	0.796218	1.06298	1.054					0.941
O14530	208	K	Thioredoxin domain-containing protein 9 OS=Homo sapiens OX=9606 GN=TXNDC9 PE=1 SV=2	TXNDC9	1	0.00347435	83.358	2	FGTNFTK(1)LEK	-2.7969	4			1.10116	1.02034	0.833994	1.04451	0.886205	1.07715	1.12345	0.796218	1.06298	1.054			0.98	1.281	0.785	0.991	1.04
O14617	165	K	AP-3 complex subunit delta-1 OS=Homo sapiens OX=9606 GN=AP3D1 PE=1 SV=1	AP3D1	1	0.0441047	51.456	2	K(1)AVLIMYK	-10.815	1				1			1.085	0.972367	1.00496	1.05216	0.915317	0.970194				0.95
O14617	7	K	AP-3 complex subunit delta-1 OS=Homo sapiens OX=9606 GN=AP3D1 PE=1 SV=1	AP3D1	1	0.0168728	53.679	2	MVK(1)GSIDR	-0.40656	1				1			1.085	0.972367	1.00496	1.05216	0.915317	0.970194				0.95
O14617	654	K	AP-3 complex subunit delta-1 OS=Homo sapiens OX=9606 GN=AP3D1 PE=1 SV=1	AP3D1	1	1.70775e-06	124.06	4	RPK(1)HRPSEADEEELAR	-0.083938	6	1.26308	0.981731	0.780052	1.55702	0.858134	0.559985	1.085	0.972367	1.00496	1.05216	0.915317	0.970194	1.164	1.01	0.776	1.48	0.938	0.577	1.015	0.890902
O14618	265	K	Copper chaperone for superoxide dismutase OS=Homo sapiens OX=9606 GN=CCS PE=1 SV=1	CCS	1	0.000149124	137.84	2	K(1)ESAQPPAHL	0.23018	5	0.657217	1.17178		0.946399	1.18783	1.03677	0.905827	1.00085	1.05404	0.940101	1.0319	1.06729	0.726	1.171		1.007	1.151	0.971	1.1	0.571286
O14647	1769	K	Chromodomain-helicase-DNA-binding protein 2 OS=Homo sapiens OX=9606 GN=CHD2 PE=1 SV=2	CHD2	1	0.000482877	110.52	2	SFHTDK(1)LGEYK	-0.91897	3		0.993779		1.33954		0.666679	1.05169	0.916882	0.921463	1.3279	0.86825	0.913814		1.084		1.009		0.73	0.802
O14654	618	K	Insulin receptor substrate 4 OS=Homo sapiens OX=9606 GN=IRS4 PE=1 SV=1	IRS4	1	0.0281802	58.916	2	SYFGK(1)LTQSK	1.9847	1	1
P49792	1963	K	E3 SUMO-protein ligase RanBP2 OS=Homo sapiens OX=9606 GN=RANBP2 PE=1 SV=2	RANBP2	1	0.0329496	47.561	2	STSGEGFQFGK(1)K	0.24237	1				1			1.01894	0.989571	0.973511	1.01211	1.00815	0.997715				0.988
O14737	20	K	Programmed cell death protein 5 OS=Homo sapiens OX=9606 GN=PDCD5 PE=1 SV=3	PDCD5	1	4.54848e-06	70.831	3	LAELQAK(1)HGDPGDAAQQEAK	-0.3838	1					1		1.10271	0.865693	0.950909	1.02389	0.991508	1.06529					1.009
O14737	110	K	Programmed cell death protein 5 OS=Homo sapiens OX=9606 GN=PDCD5 PE=1 SV=3	PDCD5	1	0.00059844	130	2	TTTVK(1)FNR	-0.9772	6	0.903863	1.0173	1.10231	0.777929	0.979351	1.21925	1.10271	0.865693	0.950909	1.02389	0.991508	1.06529	0.82	1.175	1.159	0.76	0.988	1.145	0.917	0.63122
O14737	105	K	Programmed cell death protein 5 OS=Homo sapiens OX=9606 GN=PDCD5 PE=1 SV=3	PDCD5	1	5.01096e-06	99.174	2	VSQQTEK(1)TTTVK	-0.0014018	3		0.919345	0.836904			1.24375	1.10271	0.865693	0.950909	1.02389	0.991508	1.06529		1.062	0.88			1.168	1.203
O14744	240	K	Protein arginine N-methyltransferase 5 OS=Homo sapiens OX=9606 GN=PRMT5 PE=1 SV=4	PRMT5	1	0.000582893	85.821	2	AAILPTSIFLTNK(1)K	-3.6815	5	1.44472	0.73604	0.543828	1.65698	0.618427		1.04123	0.987609	1.00584	1.03059	0.949911	0.98482	1.388	0.745	0.541	1.608	0.651		1.267	0.689122
O14818	52	K	Proteasome subunit alpha type-7 OS=Homo sapiens OX=9606 GN=PSMA7 PE=1 SV=1	PSMA7	1	0.000336712	115.86	2	SVAK(1)LQDER	-0.5898	6	0.809002	1.1401	0.975322	1.04351	0.999144	1.03292	0.974229	1.00134	0.971691	0.963609	1.04579	1.04334	0.83	1.139	1.004	1.083	0.955	0.99	1.018	0.811622
O14879	390	K	Interferon-induced protein with tetratricopeptide repeats 3 OS=Homo sapiens OX=9606 GN=IFIT3 PE=1 SV=1	IFIT3	1	0.000724834	76.009	3	SEDTAVQHGLEGLSISK(1)K	0.6817	2		0.806354			1.19365		0.344852	1.40733	0.746753	0.560558	1.97667	0.963832		0.573			0.604		1.054
O14908	10	K	PDZ domain-containing protein GIPC1 OS=Homo sapiens OX=9606 GN=GIPC1 PE=1 SV=2	GIPC1	1	3.99596e-17	170.22	2	K(1)APPLVENEEAEPGR	-1.8991	6	1.05679	1.01992	0.970053	1.11366	0.900868	0.938708	0.936279	1.05924	1.06182	0.95865	0.98911	0.994897	1.129	0.963	0.914	1.162	0.911	0.944	1.004	0.985867
O14974	442	K	Protein phosphatase 1 regulatory subunit 12A OS=Homo sapiens OX=9606 GN=PPP1R12A PE=1 SV=1	PPP1R12A	1	2.6027e-13	106.97	2	K(1)TGSYGALAEITASK	-3.1299	1						1	0.975671	0.995657	1.01856	0.966233	0.996601	1.04728						0.955
O14974	532	K	Protein phosphatase 1 regulatory subunit 12A OS=Homo sapiens OX=9606 GN=PPP1R12A PE=1 SV=1	PPP1R12A	1	0.00439856	90.761	2	K(1)WEDDLKK	-0.043181	6	1.27295	0.978813	0.722574	1.52691	0.754781	0.743974	0.975671	0.995657	1.01856	0.966233	0.996601	1.04728	1.305	0.983	0.709	1.58	0.757	0.71	1.017	0.944964
O14981	248	K	TATA-binding protein-associated factor 172 OS=Homo sapiens OX=9606 GN=BTAF1 PE=1 SV=2	BTAF1	1	3.92468e-17	183.08	2	K(1)IANVVINQSANDSK	-1.352	6	0.969436	1.01881	0.9835	1.36912	0.792376	0.86675	0.918479	1.08207	0.959849	1.02414	1.03421	0.981248	1.055	0.942	1.025	1.337	0.766	0.883	0.988	0.827386
O15014	1310	K	Zinc finger protein 609 OS=Homo sapiens OX=9606 GN=ZNF609 PE=1 SV=2	ZNF609	1	4.75448e-05	55.604	3	ALDILQQHASHYK(1)SK	0.55428	3		0.906564			0.873427	1.22001				0.927783	1.07222						0.815
O15014	586	K	Zinc finger protein 609 OS=Homo sapiens OX=9606 GN=ZNF609 PE=1 SV=2	ZNF609	1	0.0208735	58.286	2	FSTK(1)GLCK	-1.4168	2			0.961419		1.03858					0.927783	1.07222						0.969
O15014	84	K	Zinc finger protein 609 OS=Homo sapiens OX=9606 GN=ZNF609 PE=1 SV=2	ZNF609	1	0.00627572	67.548	2	FVTPVPGPQGK(1)EGK	-0.46581	1				1						0.927783	1.07222					1.078
O15014	647	K	Zinc finger protein 609 OS=Homo sapiens OX=9606 GN=ZNF609 PE=1 SV=2	ZNF609	0.999986	0.000699704	104.04	3	KPSSLKPEK(1)IPSK	0.081245	3					0.925802	1.0742				0.927783	1.07222						0.863
O15014	1100	K	Zinc finger protein 609 OS=Homo sapiens OX=9606 GN=ZNF609 PE=1 SV=2	ZNF609	1	0.00642699	79.311	2	VK(1)LSDASHLSK	-0.3164	2		1.02442			0.975579					0.927783	1.07222						0.91
O15027	2118	K	Protein transport protein Sec16A OS=Homo sapiens OX=9606 GN=SEC16A PE=1 SV=4	SEC16A	1	0.0203494	57.888	2	K(1)TEAYLPDDK	-1.5756	2					0.873843	1.12616	1.04563	0.985615	0.925459	1.0541	0.992429	0.996765					0.881	1.13
O15042	88	K	U2 snRNP-associated SURP motif-containing protein OS=Homo sapiens OX=9606 GN=U2SURP PE=1 SV=2	U2SURP	1	0.000230526	76.572	2	AFSIGK(1)MSTAK	0.6382	5		1.11938	0.990676	0.557137	1.19794	1.13487	0.964695	1.00734	0.995392	0.969481	1.03755	1.02554		1.111	0.995	0.575	1.155	1.107	0.898	0.639805
O15042	168	K	U2 snRNP-associated SURP motif-containing protein OS=Homo sapiens OX=9606 GN=U2SURP PE=1 SV=2	U2SURP	1	0.000227423	48.945	3	FADQK(1)NPPNQSSNERPPSLLVIETK	1.1439	1						1	0.964695	1.00734	0.995392	0.969481	1.03755	1.02554						0.975
O15042	188	K	U2 snRNP-associated SURP motif-containing protein OS=Homo sapiens OX=9606 GN=U2SURP PE=1 SV=2	U2SURP	0.75245	0.000215447	62.304	4	NPPNQSSNERPPSLLVIETK(0.752)K(0.248)PPLK	0.68147	1				1			0.964695	1.00734	0.995392	0.969481	1.03755	1.02554				1.031
O15042	832	K	U2 snRNP-associated SURP motif-containing protein OS=Homo sapiens OX=9606 GN=U2SURP PE=1 SV=2	U2SURP	1	0.000455588	106.35	2	FSK(1)YSEMSEEK	0.27003	5	1.02971	1.10219	0.933725	1.11548	0.818901		0.964695	1.00734	0.995392	0.969481	1.03755	1.02554	1.067	1.094	0.938	1.151	0.789		0.939	0.644906
O15042	159	K	U2 snRNP-associated SURP motif-containing protein OS=Homo sapiens OX=9606 GN=U2SURP PE=1 SV=2	U2SURP	1	0.0842934	58.687	2	IYK(1)PSSR	0.3019	1				1			0.964695	1.00734	0.995392	0.969481	1.03755	1.02554				1.031
O15042	755	K	U2 snRNP-associated SURP motif-containing protein OS=Homo sapiens OX=9606 GN=U2SURP PE=1 SV=2	U2SURP	1	0.000336371	91.245	2	NEPIFK(1)VAPSK	-0.9199	8	1.00987	0.959008	0.907117	1.20924	0.951536	0.963233	0.964695	1.00734	0.995392	0.969481	1.03755	1.02554	1.047	0.952	0.911	1.247	0.917	0.939	1.066	0.628944
O15042	201	K	U2 snRNP-associated SURP motif-containing protein OS=Homo sapiens OX=9606 GN=U2SURP PE=1 SV=2	U2SURP	1	0.00113698	98.009	2	K(1)SNLELFK	-0.58466	4		1.05046	0.880046		0.868656	1.20084	0.964695	1.00734	0.995392	0.969481	1.03755	1.02554		1.043	0.884		0.837	1.171	1.042	0.885295
O15042	80	K	U2 snRNP-associated SURP motif-containing protein OS=Homo sapiens OX=9606 GN=U2SURP PE=1 SV=2	U2SURP	1	0.000420913	155.82	2	PLLENK(1)LK	-0.087743	6	0.915829	0.962453	0.997319	1.17312	0.970373	0.980907	0.964695	1.00734	0.995392	0.969481	1.03755	1.02554	0.949	0.955	1.002	1.21	0.935	0.956	1.067	0.527256
O15042	865	K	U2 snRNP-associated SURP motif-containing protein OS=Homo sapiens OX=9606 GN=U2SURP PE=1 SV=2	U2SURP	0.77149	0.000858352	61.067	4	RPK(0.771)K(0.229)PGQSFQEQVEHYR	-0.68924	2	1.18645			0.813551			0.964695	1.00734	0.995392	0.969481	1.03755	1.02554	1.23			0.839			0.682
O15144	295	K	Actin-related protein 2/3 complex subunit 2 OS=Homo sapiens OX=9606 GN=ARPC2 PE=1 SV=1	ARPC2	1	0.00612073	67.881	2	TITGK(1)TFSSR	-0.066129	3		0.921898		1.03233	1.04578		1.00127	0.996331	1.00442	1.01595	0.955294	1.02673		0.925		1.016	1.095		1.141
O15156	212	K	Zinc finger and BTB domain-containing protein 7B OS=Homo sapiens OX=9606 GN=ZBTB7B PE=1 SV=2	ZBTB7B	1	0.000316698	155.82	2	AFLQTK(1)GAR	-0.73991	6	0.950618	1.09898	0.958791	0.985363	1.03736	0.968886	0.804782	1.08141	0.839732	1.25795	1.08058	0.93555	1.181	1.016	1.142	0.783	0.96	1.036	0.832	0.119023
O15156	360	K	Zinc finger and BTB domain-containing protein 7B OS=Homo sapiens OX=9606 GN=ZBTB7B PE=1 SV=2	ZBTB7B	1	0.00170926	78.178	2	IIHGAGK(1)LPR	0.23192	4	1.06363	1.27722	0.886479			0.772667	0.804782	1.08141	0.839732	1.25795	1.08058	0.93555	1.322	1.181	1.056			0.826	0.696
O15156	206	K	Zinc finger and BTB domain-containing protein 7B OS=Homo sapiens OX=9606 GN=ZBTB7B PE=1 SV=2	ZBTB7B	1	0.00143719	134.85	2	K(1)AFLQTK	1.595	6	0.884284	1.08708	0.97395	1.07732	1.11805	0.859312	0.804782	1.08141	0.839732	1.25795	1.08058	0.93555	1.099	1.005	1.16	0.856	1.035	0.919	0.861	0.0950356
O15231	201	K	Zinc finger protein 185 OS=Homo sapiens OX=9606 GN=ZNF185 PE=1 SV=3	ZNF185	1	8.12815e-05	117.3	2	EHSYVLSAAK(1)K	0.44837	4	1.40502		0.818731	1.51946	0.256789		1.01318	1.03116	1.0597	0.983475	0.904358	1.00813	1.387		0.773	1.545	0.284		0.847	0.667495
O15294	16	K	UDP-N-acetylglucosamine--peptide N-acetylglucosaminyltransferase 110 kDa subunit OS=Homo sapiens OX=9606 GN=OGT PE=1 SV=3	OGT	1	6.00245e-18	175.68	2	ASSVGNVADSTEPTK(1)R	-0.50185	5	0.563794	1.36461	0.698917		0.994093	1.37859	0.691506	1.14121	0.992832	0.710468	1.20859	1.25539	0.815	1.196	0.704		0.823	1.098	1.061	0.766716
O15347	170	K	High mobility group protein B3 OS=Homo sapiens OX=9606 GN=HMGB3 PE=1 SV=4	HMGB3	1	0.00924316	69.905	2	FDGAK(1)GPAK	-0.23441	3	0.788059	0.688754		1.52319			0.983107	0.931754	1.14648	1.54277	0.577479	0.818408	0.802	0.739		0.987			1.281
O15355	247	K	Protein phosphatase 1G OS=Homo sapiens OX=9606 GN=PPM1G PE=1 SV=1	PPM1G	1	3.5974e-47	169.26	3	GTEAGQVGEPGIPTGEAGPSCSSASDK(1)LPR	0.37377	6	2.19229	1.24239	0.397353	1.23681	0.72978	0.201376	1.014	1.03497	1.07972	0.957637	0.973022	0.940646	2.162	1.2	0.368	1.292	0.75	0.214	0.605	0.531803
O15355	519	K	Protein phosphatase 1G OS=Homo sapiens OX=9606 GN=PPM1G PE=1 SV=1	PPM1G	1	7.29808e-06	144.47	2	NTAELQPESGK(1)R	0.50562	6	1.06972	1.16445	1.00201	0.940764	0.934895	0.888158	1.014	1.03497	1.07972	0.957637	0.973022	0.940646	1.055	1.125	0.928	0.982	0.961	0.944	0.929	0.287716
O15371	142	K	Eukaryotic translation initiation factor 3 subunit D OS=Homo sapiens OX=9606 GN=EIF3D PE=1 SV=1	EIF3D	1	0.00103723	126.2	2	FQK(1)QFGVR	0.55871	12	0.915564	0.944572	1.01358	0.912575	1.08733	1.12638	1.02812	1.04296	1.06078	0.905048	1.01372	0.949358	0.891	0.906	0.955	1.008	1.073	1.186	1.187	0.0305416
O15371	53	K	Eukaryotic translation initiation factor 3 subunit D OS=Homo sapiens OX=9606 GN=EIF3D PE=1 SV=1	EIF3D	1	2.3876e-07	138.71	2	VADWTGATYQDK(1)R	0.21821	6	1.37409	1.17244	0.718444	0.893647	0.931936	0.909441	1.02812	1.04296	1.06078	0.905048	1.01372	0.949358	1.337	1.124	0.677	0.987	0.919	0.958	0.913	0.810456
O15372	5	K	Eukaryotic translation initiation factor 3 subunit H OS=Homo sapiens OX=9606 GN=EIF3H PE=1 SV=1	EIF3H	1	7.956e-07	69.613	2	K(1)EGTGSTATSSSSTAGAAGK	-0.88885	3			1.29379		0.933507	0.772707	1.00555	1.02405	1.06537	0.920931	0.981602	1.0025			1.214		0.951	0.771	0.709
O15381	156	K	Nuclear valosin-containing protein-like OS=Homo sapiens OX=9606 GN=NVL PE=1 SV=1	NVL	1	0.0187871	72.365	2	ISSK(1)TGSIPLK	-0.14558	4		1.09768		1.02176	0.907731	0.97283		1.0832	0.933192		1.0027	0.980909		1.013			0.905	0.992	0.936
O15498	141	K	Synaptobrevin homolog YKT6 OS=Homo sapiens OX=9606 GN=YKT6 PE=1 SV=1	YKT6	1	2.76703e-08	146.37	2	EADPMTK(1)VQAELDETK	-0.016814	3			0.981339	1.32526		0.693399	0.979426	0.989797	1.01969	1.04451	1.01259	0.953994			0.962	1.269		0.727	1.037
O15511	3	K	Actin-related protein 2/3 complex subunit 5 OS=Homo sapiens OX=9606 GN=ARPC5 PE=1 SV=3	ARPC5	1	0.000538039	79.059	2	SK(1)NTVSSAR	-1.717	4		1.25873	1.00188		0.842441	0.896952	1.01911	0.99546	1.05783	0.974506	0.872088	1.08101		1.264	0.947		0.966	0.83	0.812	0.344171
O15541	139	K	E3 ubiquitin-protein ligase RNF113A OS=Homo sapiens OX=9606 GN=RNF113A PE=1 SV=1	RNF113A	1	0.000894342	100.84	2	SQK(1)IQEELR	-0.39791	6	0.935917	1.12103	0.928707	1.01355	0.991875	1.00892	1.57317	0.969777	1.00976	0.930602	0.377414	1.13928	0.595	1.156	0.92	1.089	2.628	0.886	1.723	0.296975
O15541	69	K	E3 ubiquitin-protein ligase RNF113A OS=Homo sapiens OX=9606 GN=RNF113A PE=1 SV=1	RNF113A	1	0.000488001	117.99	3	VTHNPMIQK(1)TR	-0.19605	9	1.04332	1.25573	0.725705	1.39056	0.855043	0.729642	1.57317	0.969777	1.00976	0.930602	0.377414	1.13928	0.663	1.295	0.719	1.494	2.266	0.64	1.644	0.383152
O43143	786	K	Pre-mRNA-splicing factor ATP-dependent RNA helicase DHX15 OS=Homo sapiens OX=9606 GN=DHX15 PE=1 SV=2	DHX15	1	0.0677082	53.878	2	IIAK(1)LQSK	-0.22165	1		1					0.985719	1.0165	1.0411	1.0156	0.964266	0.976811		0.984
O43143	17	K	Pre-mRNA-splicing factor ATP-dependent RNA helicase DHX15 OS=Homo sapiens OX=9606 GN=DHX15 PE=1 SV=2	DHX15	1	1.30113e-16	215.84	2	LDLGEDYPSGK(1)K	0.50168	6	1.02007	0.992365	0.91176	1.26065	0.84421	0.970951	0.985719	1.0165	1.0411	1.0156	0.964266	0.976811	1.035	0.976	0.876	1.241	0.875	0.994	1.077	0.589929
O43143	3	K	Pre-mRNA-splicing factor ATP-dependent RNA helicase DHX15 OS=Homo sapiens OX=9606 GN=DHX15 PE=1 SV=2	DHX15	1	0.00027	55.604	4	SK(1)RHRLDLGEDYPSGK	0.73095	3	0.852816		1.13156		1.01562		0.985719	1.0165	1.0411	1.0156	0.964266	0.976811	0.865		1.087		1.053		1.079
O43148	83	K	mRNA cap guanine-N7 methyltransferase OS=Homo sapiens OX=9606 GN=RNMT PE=1 SV=1	RNMT	1	0.000211805	103.76	2	K(1)LDPEIVPEEK	1.228	6	1.43009	0.865223	0.751553	1.46904	0.70817	0.775922	1.05057	0.905509	1.01766	1.03473	0.987152	1.00438	1.361	0.956	0.739	1.42	0.717	0.773	0.952	0.822985
O43159	78	K	Ribosomal RNA-processing protein 8 OS=Homo sapiens OX=9606 GN=RRP8 PE=1 SV=2	RRP8	1	8.05405e-07	128.57	2	K(1)ASFASASAEVGK	-0.9562	5	0.916383		1.09701	1.46501	0.825767	0.695837	1.11902	1.01645	1.02284	1.00197	0.937276	0.902452	0.819		1.073	1.462	0.881	0.771	1.097	0.833002
O43172	45	K	U4/U6 small nuclear ribonucleoprotein Prp4 OS=Homo sapiens OX=9606 GN=PRPF4 PE=1 SV=2	PRPF4	1	0.00539907	74.849	2	LAK(1)GESGILGK	-0.15911	3				1.29569	0.813001	0.891312	0.867947	1.01593	1.00898	0.979252	1.08833	1.03956				1.323	0.747	0.857
O43172	15	K	U4/U6 small nuclear ribonucleoprotein Prp4 OS=Homo sapiens OX=9606 GN=PRPF4 PE=1 SV=2	PRPF4	1	0.0570592	51.454	2	TK(1)APDDLVAPVVK	-1.9372	1						1	0.867947	1.01593	1.00898	0.979252	1.08833	1.03956						0.962
O43237	462	K	Cytoplasmic dynein 1 light intermediate chain 2 OS=Homo sapiens OX=9606 GN=DYNC1LI2 PE=1 SV=1	DYNC1LI2	1	3.08356e-08	95.345	2	SGQK(1)TVLSNVQEELDR	-2.1428	3			1.20081		1.3985	0.40069	1.03652	0.984407	0.952693	1.10199	0.965275	0.959121			1.26		1.449	0.418	0.741
O43242	503	K	26S proteasome non-ATPase regulatory subunit 3 OS=Homo sapiens OX=9606 GN=PSMD3 PE=1 SV=2	PSMD3	1	5.58398e-05	108.24	2	SYNK(1)DLESAEER	1.1914	2		0.610275		1.38973			1.00512	0.990904	1.02036	1.01763	0.949464	1.01652		0.616		1.366			2.218
O43252	12	K	Bifunctional 3'-phosphoadenosine 5'-phosphosulfate synthase 1 OS=Homo sapiens OX=9606 GN=PAPSS1 PE=1 SV=2	PAPSS1	1	6.92734e-11	130.99	2	VK(1)LSNNAQNWGMQR	-0.090499	6	0.859993	1.18723	0.557212	1.588	1.09514	0.712431	1.03109	1.0051	0.948935	1.02504	1.0248	0.965039	0.834	1.181	0.587	1.549	1.069	0.738	1.29	0.444177
O43290	302	K	U4/U6.U5 tri-snRNP-associated protein 1 OS=Homo sapiens OX=9606 GN=SART1 PE=1 SV=1	SART1	1	0.0237322	67.464	2	AEK(1)NVELR	0.38715	1		1					1.07326	0.9096	0.983497	1.05109	0.978132	1.00442		1.099
O43290	666	K	U4/U6.U5 tri-snRNP-associated protein 1 OS=Homo sapiens OX=9606 GN=SART1 PE=1 SV=1	SART1	1	7.62472e-07	86.135	2	APNK(1)SLPSAVYCIEDK	-0.49346	6	1.14473	1.38992	0.747316	0.900041	0.999802	0.818185	1.07326	0.9096	0.983497	1.05109	0.978132	1.00442	1.067	1.528	0.76	0.856	1.022	0.815	0.803	0.435948
O43290	657	K	U4/U6.U5 tri-snRNP-associated protein 1 OS=Homo sapiens OX=9606 GN=SART1 PE=1 SV=1	SART1	1	0.000105099	109.88	2	GLLETTVQK(1)VAR	-0.87386	4			1.06438	1.13277	0.99436	0.808496	1.07326	0.9096	0.983497	1.05109	0.978132	1.00442			1.082	1.078	1.017	0.805	0.893
O43290	183	K	U4/U6.U5 tri-snRNP-associated protein 1 OS=Homo sapiens OX=9606 GN=SART1 PE=1 SV=1	SART1	1	0.0474317	42.229	2	LLNQK(1)LGK	-0.6702	2		0.923399			1.0766		1.07326	0.9096	0.983497	1.05109	0.978132	1.00442		1.015			1.101		1.085
O60506	576	K	Heterogeneous nuclear ribonucleoprotein Q OS=Homo sapiens OX=9606 GN=SYNCRIP PE=1 SV=2	SYNCRIP	1	0.00261032	81.335	2	ADGYNQPDSK(1)R	0.18661	1				1			1.06439	0.951525	0.997221	1.07359	0.953446	0.959827				0.931
O60506	566	K	Heterogeneous nuclear ribonucleoprotein Q OS=Homo sapiens OX=9606 GN=SYNCRIP PE=1 SV=2	SYNCRIP	1	3.27227e-10	187.33	2	K(1)ADGYNQPDSK	0.33627	6	0.312985	0.772197	0.851848	2.00477	1.02249	1.03571	1.06439	0.951525	0.997221	1.07359	0.953446	0.959827	0.294	0.812	0.854	1.867	1.072	1.079	2.05	0.115882
O43395	103	K	U4/U6 small nuclear ribonucleoprotein Prp3 OS=Homo sapiens OX=9606 GN=PRPF3 PE=1 SV=2	PRPF3	1	2.48516e-05	90.156	2	EVFGDDSEISK(1)ESSGVK	-0.98196	1				1			0.90955	1.02184	1.04631	0.901461	1.05093	1.0699				1.109
O43395	328	K	U4/U6 small nuclear ribonucleoprotein Prp3 OS=Homo sapiens OX=9606 GN=PRPF3 PE=1 SV=2	PRPF3	1	0.0648788	41.025	2	TFK(1)FHDK	0.72669	1						1	0.90955	1.02184	1.04631	0.901461	1.05093	1.0699						0.935
O43633	94	K	Charged multivesicular body protein 2a OS=Homo sapiens OX=9606 GN=CHMP2A PE=1 SV=1	CHMP2A	1	3.89277e-77	293.43	2	IQTLK(1)SNNSMAQAMK	-0.30868	11	1.38614	0.848734	0.944531	1.25051	0.71898	0.851108	1.29185	0.833517	0.980137	1.22188	0.808911	0.863712	1.073	1.018	0.964	1.023	0.889	0.985	0.948	0.359477
O43633	197	K	Charged multivesicular body protein 2a OS=Homo sapiens OX=9606 GN=CHMP2A PE=1 SV=1	CHMP2A	1	1.35135e-20	145.73	2	K(1)AEAAASALADADADLEER	-1.3619	6	0.802558	0.765518	1.05382	2.23255	0.440095	0.705451	1.29185	0.833517	0.980137	1.22188	0.808911	0.863712	0.621	0.918	1.075	1.827	0.544	0.817	1.22	0.822437
O43633	9	K	Charged multivesicular body protein 2a OS=Homo sapiens OX=9606 GN=CHMP2A PE=1 SV=1	CHMP2A	1	0.0043804	81.642	2	K(1)TPEELLR	0.9811	4		0.973468	0.842875	1.47951		0.704151	1.29185	0.833517	0.980137	1.22188	0.808911	0.863712		1.168	0.86	1.211		0.815	0.999	0.975157
O43660	510	K	Pleiotropic regulator 1 OS=Homo sapiens OX=9606 GN=PLRG1 PE=1 SV=1	PLRG1	0.998638	4.14702e-25	142.32	4	VYREDDTATEETHPVSWK(0.001)PEIIK(0.999)R	0.79189	10	1.45741	0.975135	0.738453	1.062	0.767002		0.975242	0.997585	0.950793	1.00884	1.04415	1.02339	1.494	0.977	0.777	1.053	0.735		0.826	0.58801
O43663	484	K	Protein regulator of cytokinesis 1 OS=Homo sapiens OX=9606 GN=PRC1 PE=1 SV=2	PRC1	1	0.0408787	52.591	2	GLAPNTPGK(1)AR	0.56116	1		1						1.27722	0.755465		0.988877	0.97844		0.783
O43665	12	K	Regulator of G-protein signaling 10 OS=Homo sapiens OX=9606 GN=RGS10 PE=1 SV=3	RGS10	1	3.11971e-62	286.92	3	K(1)RPPSDIHDSDGSSSSSHQSLK	0.83005	18	1.31491	0.824892	1.0241	1.1275	0.801994	0.9066	1.10174	1.02445	1.19294	1.03326	0.777743	0.869874	1.193	0.805	0.858	1.091	1.031	1.042	1.108	0.394149
O43665	173	K	Regulator of G-protein signaling 10 OS=Homo sapiens OX=9606 GN=RGS10 PE=1 SV=3	RGS10	1	1.97045e-28	184.65	2	TEEEEEDLPDAQTAAK(1)R	-0.43996	8	1.0225	0.585511	1.09861	1.82663	0.79343	0.673325	1.10174	1.02445	1.19294	1.03326	0.777743	0.869874	0.928	0.572	0.921	1.768	1.02	0.774	1.471	0.295463
O43670	100	K	BUB3-interacting and GLEBS motif-containing protein ZNF207 OS=Homo sapiens OX=9606 GN=ZNF207 PE=1 SV=1	ZNF207	1	7.85856e-05	145.75	2	LLEQK(1)TQESQK	-0.97064	6	1.06448	1.18293	0.966637	0.9347	0.944787	0.906469	0.929563	1.05128	1.03988	0.935931	1.00193	1.04141	1.145	1.125	0.93	0.999	0.943	0.87	0.879	0.178882
O43707	592	K	Alpha-actinin-4 OS=Homo sapiens OX=9606 GN=ACTN4 PE=1 SV=2	ACTN4	1	0.000114578	101.48	2	EAILAIHK(1)EAQR	-0.85708	3	1.40064	0.786159		0.8132			1.11431	0.963261	1.03882	0.975843	0.933661	0.974097	1.257	0.816		0.833			0.804
P12814	436	K	Alpha-actinin-1 OS=Homo sapiens OX=9606 GN=ACTN1 PE=1 SV=2	ACTN1	1	1.53675e-13	148.57	3	K(1)HEAFESDLAAHQDR	-0.14212	6	1.6601	1.1374	0.939544	0.627659	0.720197	0.915098	1.13746	0.976601	1.02275	0.934584	0.940703	0.987904	1.459	1.165	0.919	0.672	0.766	0.926	0.667	0.0718386
P12814	35	K	Alpha-actinin-1 OS=Homo sapiens OX=9606 GN=ACTN1 PE=1 SV=2	ACTN1	1	4.18516e-06	148.76	2	K(1)TFTAWCNSHLR	0.71826	2			1.05526	0.944741			1.13746	0.976601	1.02275	0.934584	0.940703	0.987904			1.032	1.011			0.98
O43719	119	K	HIV Tat-specific factor 1 OS=Homo sapiens OX=9606 GN=HTATSF1 PE=1 SV=1	HTATSF1	1	3.13376e-09	121.86	3	K(1)AESGWFHVEEDR	0.59113	8	0.960067	1.25943	1.12692	0.951592	0.755677	0.946322	0.980937	0.987037	1.0671	0.973659	0.981145	1.01012	0.979	1.276	1.056	0.977	0.77	0.937	0.811	0.124379
O43768	40	K	Alpha-endosulfine OS=Homo sapiens OX=9606 GN=ENSA PE=1 SV=1	ENSA	1	0.00924316	69.905	2	AK(1)YPSLGQK	-0.96147	2		0.893483		1.10652			1.0978	1.04346	1.00652	1.01773	1.08547	0.749019		0.856		1.087			1.27
O43768	114	K	Alpha-endosulfine OS=Homo sapiens OX=9606 GN=ENSA PE=1 SV=1	ENSA	1	1.17241e-12	154.94	2	SSLVTSK(1)LAGGQVE	0.76198	9	1.21803	1.10962	0.847439	1.13932	0.984864	0.700728	1.0978	1.04346	1.00652	1.01773	1.08547	0.749019	1.11	1.063	0.842	1.119	0.907	0.936	0.982	0.896617
O43768	80	K	Alpha-endosulfine OS=Homo sapiens OX=9606 GN=ENSA PE=1 SV=1	ENSA	1	0.000225005	87.895	2	NK(1)QLPSAGPDK	-0.38155	6	0.92426	1.25204	0.965172	0.829213	1.12906	0.900259	1.0978	1.04346	1.00652	1.01773	1.08547	0.749019	0.842	1.2	0.959	0.815	1.04	1.202	1.019	0.918506
O43809	23	K	Cleavage and polyadenylation specificity factor subunit 5 OS=Homo sapiens OX=9606 GN=NUDT21 PE=1 SV=1	NUDT21	1	1.20765e-61	298.26	2	GVTQFGNK(1)YIQQTK	-0.27373	6	0.902048	1.10135	0.928745	1.29804	0.927983	0.841838	0.91002	1.05355	1.01026	1.01904	1.02385	0.983278	0.991	1.045	0.919	1.274	0.906	0.856	1.027	0.927917
O43813	128	K	Glutathione S-transferase LANCL1 OS=Homo sapiens OX=9606 GN=LANCL1 PE=1 SV=1	LANCL1	1	1.91571e-18	205.09	2	MNNEK(1)QAEDCITR	1.7467	10	1.68817	0.454294	0.544432	2.06155	0.629984	0.621572	1.26348	0.904965	0.90222	1.18481	0.891474	0.853042	1.336	0.502	0.603	1.74	0.707	0.729	1.301	0.562743
O43818	84	K	U3 small nucleolar RNA-interacting protein 2 OS=Homo sapiens OX=9606 GN=RRP9 PE=1 SV=1	RRP9	1	0.0040605	90.263	2	LAK(1)LYLEQLR	0.12265	6	1.04922	1.05634	0.954283	1.16758	0.99086	0.781719	1.01563	0.953326	1.01739	0.992566	1.01221	1.00888	1.033	1.108	0.938	1.176	0.979	0.775	0.952	0.65989
O43823	306	K	A-kinase anchor protein 8 OS=Homo sapiens OX=9606 GN=AKAP8 PE=1 SV=1	AKAP8	1	2.56603e-08	153.33	2	K(1)QFQLYEEPDTK	0.37755	5		1.20958	0.994151	1.25757	0.781719	0.756974	0.87649	1.03486	1.02068	0.910409	1.04243	1.11512		1.169	0.974	1.381	0.75	0.679	0.874	0.579831
O43896	294	K	Kinesin-like protein KIF1C OS=Homo sapiens OX=9606 GN=KIF1C PE=1 SV=3	KIF1C	1	0.00470965	84.368	2	K(1)SDFIPYR	-0.62244	1				1			1.28062	0.786871	0.935432	1.08533	1.027	0.884749				0.921
O43929	7	K	Origin recognition complex subunit 4 OS=Homo sapiens OX=9606 GN=ORC4 PE=1 SV=2	ORC4	1	4.32209e-13	118.87	3	SK(1)SNSLIHTECLSQVQR	0.43219	6	0.680144	0.965877	1.10922	1.3149	0.925655	1.00421
O60231	93	K	Pre-mRNA-splicing factor ATP-dependent RNA helicase DHX16 OS=Homo sapiens OX=9606 GN=DHX16 PE=1 SV=2	DHX16	1	0.0393632	61.494	2	ALLEK(1)NR	0.62842	4		1.06199	1.0386	0.943487	0.955916		0.972299	0.983609	1.03063	0.915187	1.0366	1.06167		1.08	1.008	1.031	0.922		0.935	0.410288
O60231	340	K	Pre-mRNA-splicing factor ATP-dependent RNA helicase DHX16 OS=Homo sapiens OX=9606 GN=DHX16 PE=1 SV=2	DHX16	1	0.000103775	119.07	2	LGAASLK(1)FGAR	-0.16702	5		1.101	0.924122	0.98494	0.725552	1.26439	0.972299	0.983609	1.03063	0.915187	1.0366	1.06167		1.119	0.897	1.076	0.7	1.191	0.981	0.876845
O60264	1036	K	SWI/SNF-related matrix-associated actin-dependent regulator of chromatin subfamily A member 5 OS=Homo sapiens OX=9606 GN=SMARCA5 PE=1 SV=1	SMARCA5	1	0.000324195	102.55	2	K(1)MDGAPDGR	1.4312	7	0.38639	0.961888	1.01185	1.5057	1.05427	1.0799	0.886304	1.02882	1.01721	0.974556	1.0282	1.0649	0.436	0.935	0.995	1.545	1.025	1.014	1.515	0.200195
O60264	119	K	SWI/SNF-related matrix-associated actin-dependent regulator of chromatin subfamily A member 5 OS=Homo sapiens OX=9606 GN=SMARCA5 PE=1 SV=1	SMARCA5	1	0.0413586	62.969	2	TPTSPLK(1)MK	0.70815	2				1.58376		0.416238	0.886304	1.02882	1.01721	0.974556	1.0282	1.0649				1.625		0.391
O60264	929	K	SWI/SNF-related matrix-associated actin-dependent regulator of chromatin subfamily A member 5 OS=Homo sapiens OX=9606 GN=SMARCA5 PE=1 SV=1	SMARCA5	1	0.000331661	113.14	2	YK(1)APFHQLR	0.43892	6	1.05635	0.951133	0.810111	1.37827	0.831702	0.972429	0.886304	1.02882	1.01721	0.974556	1.0282	1.0649	1.192	0.924	0.796	1.414	0.809	0.913	1.077	0.791616
O60281	623	K	Zinc finger protein 292 OS=Homo sapiens OX=9606 GN=ZNF292 PE=1 SV=3	ZNF292	1	0.0523213	40.224	3	ITTTNENQK(1)TNTVAK(1)QEQR	3.1032	1	1
O60281	629	K	Zinc finger protein 292 OS=Homo sapiens OX=9606 GN=ZNF292 PE=1 SV=3	ZNF292	1	0.0523213	40.224	3	ITTTNENQK(1)TNTVAK(1)QEQR	3.1032	1	1
O60306	762	K	RNA helicase aquarius OS=Homo sapiens OX=9606 GN=AQR PE=1 SV=4	AQR	1	3.76238e-30	250.16	2	K(1)DADVEDEDTEEAK	1.0638	5	0.926703	1.09345	0.822757		1.08131	1.07579	0.767862	1.10289	1.08125	0.837642	1.1166	1.09376	1.207	0.991	0.761		0.968	0.984	0.99	0.970135
O60502	597	K	Protein O-GlcNAcase OS=Homo sapiens OX=9606 GN=OGA PE=1 SV=2	OGA	1	7.50887e-06	120.65	2	ANSSVVSVNCK(1)GK	-0.26797	4	1.4358	0.810229		1.18309	0.570877		1.12382	0.931617	0.997824	1.05823	0.954543	0.933961	1.278	0.87		1.118	0.598		0.799	0.560179
O60563	590	K	Cyclin-T1 OS=Homo sapiens OX=9606 GN=CCNT1 PE=1 SV=1	CCNT1	1	7.16283e-21	153.05	2	GPSEETGGAVFDHPAK(1)IAK	-1.0131	1						1	1.01003	0.969829	0.981274	1.01187	1.00814	1.01886						0.981
O60610	1224	K	Protein diaphanous homolog 1 OS=Homo sapiens OX=9606 GN=DIAPH1 PE=1 SV=2	DIAPH1	1	5.4544e-12	101.43	2	K(1)AGCAVTSLLASELTK	0.89654	4	1.67583	0.84352		1.27149		0.209156	1.03178	1.02124	1.09804	0.974965	0.927305	0.946661	1.624	0.826		1.304		0.221	0.622	0.503148
O60610	35	K	Protein diaphanous homolog 1 OS=Homo sapiens OX=9606 GN=DIAPH1 PE=1 SV=2	DIAPH1	1	0.0206254	46.358	2	SPDELPSAGGDGGK(1)SK	-1.8009	1			1				1.03178	1.02124	1.09804	0.974965	0.927305	0.946661			0.911
O60610	1252	K	Protein diaphanous homolog 1 OS=Homo sapiens OX=9606 GN=DIAPH1 PE=1 SV=2	DIAPH1	1	0.00103325	88.796	2	VSK(1)NSETFPTILEEAK	-5.5865	1				1			1.03178	1.02124	1.09804	0.974965	0.927305	0.946661				1.026
O60664	128	K	Perilipin-3 OS=Homo sapiens OX=9606 GN=PLIN3 PE=1 SV=3	PLIN3	1	1.30365e-90	306.65	2	ELVSSK(1)VSGAQEMVSSAK	0.14437	6	1.27858	1.17791	0.703825	1.34555	0.795811	0.698326	1.14023	0.941778	1.01785	1.01134	0.894158	0.994649	1.121	1.251	0.691	1.33	0.89	0.702	0.954	0.853822
O60664	164	K	Perilipin-3 OS=Homo sapiens OX=9606 GN=PLIN3 PE=1 SV=3	PLIN3	1	0.000217957	94.66	2	GAVQSGVDK(1)TK	0.53603	6	0.923215	1.16459	0.65794	1.30493	1.009	0.940331	1.14023	0.941778	1.01785	1.01134	0.894158	0.994649	0.81	1.237	0.646	1.29	1.128	0.945	1.249	0.299015
O60664	166	K	Perilipin-3 OS=Homo sapiens OX=9606 GN=PLIN3 PE=1 SV=3	PLIN3	1	3.42646e-28	155.34	2	TK(1)SVVTGGVQSVMGSR	-0.11192	6	1.09015	1.10474	0.879267	1.1192	0.961807	0.844834	1.14023	0.941778	1.01785	1.01134	0.894158	0.994649	0.956	1.173	0.864	1.107	1.076	0.849	1.013	0.9133
O60664	314	K	Perilipin-3 OS=Homo sapiens OX=9606 GN=PLIN3 PE=1 SV=3	PLIN3	0.997639	1.7837e-05	71.912	3	QLQGPEK(0.998)EPPK(0.002)PEQVESR	1.0038	1				1			1.14023	0.941778	1.01785	1.01134	0.894158	0.994649				0.989
O60664	84	K	Perilipin-3 OS=Homo sapiens OX=9606 GN=PLIN3 PE=1 SV=3	PLIN3	1	0.00262637	62.95	3	TLTAAAVSGAQPILSK(1)LEPQIASASEYAHR	2.7081	1	1						1.14023	0.941778	1.01785	1.01134	0.894158	0.994649	0.877
O60664	65	K	Perilipin-3 OS=Homo sapiens OX=9606 GN=PLIN3 PE=1 SV=3	PLIN3	1	0.000149686	121.8	2	TVCDAAEK(1)GVR	-0.83264	6	1.11416	1.08204	0.822298	1.21559	0.895272	0.87064	1.14023	0.941778	1.01785	1.01134	0.894158	0.994649	0.977	1.149	0.808	1.202	1.001	0.875	1.049	0.735587
O60664	122	K	Perilipin-3 OS=Homo sapiens OX=9606 GN=PLIN3 PE=1 SV=3	PLIN3	1	3.86827e-05	81.799	2	VLADTK(1)ELVSSK	0.010488	4	1.30428	0.740869		0.970093		0.984755	1.14023	0.941778	1.01785	1.01134	0.894158	0.994649	1.144	0.787		0.959		0.99	1.009	0.900513
O60684	18	K	Importin subunit alpha-7 OS=Homo sapiens OX=9606 GN=KPNA6 PE=1 SV=1	KPNA6	1	1.03323e-06	101.64	2	SYK(1)NNALNPEEMR	2.4068	5	0.922127	1.25603	0.904453		0.944068	0.973323	0.950408	1.01673	1.01383	0.850176	1.05865	1.11021	0.97	1.235	0.892		0.892	0.877	0.857	0.333799
O60701	490	K	UDP-glucose 6-dehydrogenase OS=Homo sapiens OX=9606 GN=UGDH PE=1 SV=1	UGDH	0.931491	4.06672e-05	135.28	2	FSLQDPPNK(0.931)K(0.069)PK	-0.28256	11	1.3147	1.38632	0.914518	1.17202	1.04267	0.169765	0.974069	1.02207	0.997403	1.01212	0.964125	1.03021	1.35	1.356	0.917	1.158	1.081	0.165	0.664	0.344011
O60701	481	K	UDP-glucose 6-dehydrogenase OS=Homo sapiens OX=9606 GN=UGDH PE=1 SV=1	UGDH	1	3.88756e-09	111.03	3	RIPYAPSGEIPK(1)FSLQDPPNK	-0.14701	1				1			0.974069	1.02207	0.997403	1.01212	0.964125	1.03021				0.988
Q93079	35	K	Histone H2B type 1-H OS=Homo sapiens OX=9606 GN=H2BC9 PE=1 SV=3	H2BC9	1	0.000310111	107.08	2	K(1)ESYSVYVYK	0.49972	6	1.21447	1.00201	0.856491	1.12957	0.792953	1.00451
Q93079	109	K	Histone H2B type 1-H OS=Homo sapiens OX=9606 GN=H2BC9 PE=1 SV=3	H2BC9	1	1.70797e-12	135.13	2	LLLPGELAK(1)HAVSEGTK	-0.094904	11	0.833874	0.840435	0.667664	2.0178	0.776247	0.863982
P62807	6	K	Histone H2B type 1-C/E/F/G/I OS=Homo sapiens OX=9606 GN=H2BC4 PE=1 SV=4	H2BC4	1	8.67473e-05	164.31	2	PEPAK(1)SAPAPK	-0.053345	14	1.10372	0.938526	0.87611	1.31155	0.880458	0.889639
Q93079	47	K	Histone H2B type 1-H OS=Homo sapiens OX=9606 GN=H2BC9 PE=1 SV=3	H2BC9	1	9.14736e-17	183	2	VLK(1)QVHPDTGISSK	0.14663	11	1.3511	1.15563	0.9427	0.721674	0.891188	0.937707
O60828	189	K	Polyglutamine-binding protein 1 OS=Homo sapiens OX=9606 GN=PQBP1 PE=1 SV=1	PQBP1	1	0.000298597	92.445	2	REELAPYPK(1)SK	0.11177	9	1.04254		0.913498	1.13579	0.814703	1.09348	0.966696	1.04562	1.12225	0.758222	1.046	1.06121	1.078		0.814	1.498	0.779	1.03	1.165	0.6665
O60828	223	K	Polyglutamine-binding protein 1 OS=Homo sapiens OX=9606 GN=PQBP1 PE=1 SV=1	PQBP1	1	0.00152217	84.368	2	GTWSTGLPK(1)R	1.1254	3			1.02599	0.917005		1.05701	0.966696	1.04562	1.12225	0.758222	1.046	1.06121			0.914	1.209		0.996	1.206
O60832	11	K	H/ACA ribonucleoprotein complex subunit DKC1 OS=Homo sapiens OX=9606 GN=DKC1 PE=1 SV=3	DKC1	1	0.000148515	76.572	2	ADAEVIILPK(1)K	-0.53136	4		1.12802		1.6729	0.657799	0.541289	1.10407	0.958185	0.931168	1.11793	0.976357	0.912287		1.177		1.496	0.674	0.593	0.782
O60832	443	K	H/ACA ribonucleoprotein complex subunit DKC1 OS=Homo sapiens OX=9606 GN=DKC1 PE=1 SV=3	DKC1	1	6.70793e-05	103.76	2	APQVVAEAAK(1)TAK	0.708	4	0.927166		0.714206	1.19354	1.16508		1.10407	0.958185	0.931168	1.11793	0.976357	0.912287	0.84		0.767	1.068	1.193		1.407	0.0414038
O60832	20	K	H/ACA ribonucleoprotein complex subunit DKC1 OS=Homo sapiens OX=9606 GN=DKC1 PE=1 SV=3	DKC1	0.999997	0.000103335	56.064	4	K(1)SLPEEDVAEIQHAEEFLIKPESK	0.16394	1		1					1.10407	0.958185	0.931168	1.11793	0.976357	0.912287		1.044
O60841	275	K	Eukaryotic translation initiation factor 5B OS=Homo sapiens OX=9606 GN=EIF5B PE=1 SV=4	EIF5B	1	0.00896523	88.921	2	K(1)FEEETVK	-0.13739	2		1.1233			0.876699		1.11093	0.992931	0.994797	1.05273	0.930135	0.918477		1.131			0.943		0.834
O60841	453	K	Eukaryotic translation initiation factor 5B OS=Homo sapiens OX=9606 GN=EIF5B PE=1 SV=4	EIF5B	1	0.0277467	45.489	2	K(1)IPQQLESK	-2.0115	1		1					1.11093	0.992931	0.994797	1.05273	0.930135	0.918477		1.007
O60841	436	K	Eukaryotic translation initiation factor 5B OS=Homo sapiens OX=9606 GN=EIF5B PE=1 SV=4	EIF5B	1	0.000103528	69.201	2	LLQAQGVEVPSK(1)DSLPK	0.32925	2		0.930746		1.06925			1.11093	0.992931	0.994797	1.05273	0.930135	0.918477		0.937		1.016			1.084
O60869	143	K	Endothelial differentiation-related factor 1 OS=Homo sapiens OX=9606 GN=EDF1 PE=1 SV=1	EDF1	1	0.000356359	127.93	2	DIGKPIEK(1)GPR	0.98842	6	0.699238	1.10127	0.94522	1.18022	0.940837	1.13322	0.916039	0.980195	1.06213	0.949285	0.999503	1.09285	0.763	1.124	0.89	1.243	0.941	1.037	1.16	0.329081
O60869	56	K	Endothelial differentiation-related factor 1 OS=Homo sapiens OX=9606 GN=EDF1 PE=1 SV=1	EDF1	0.999996	0.0071848	84.309	3	QHSITK(1)NTAKLDR	1.0378	2			0.906362	1.09364			0.916039	0.980195	1.06213	0.949285	0.999503	1.09285			0.853	1.152			1.351
O60869	25	K	Endothelial differentiation-related factor 1 OS=Homo sapiens OX=9606 GN=EDF1 PE=1 SV=1	EDF1	1	1.10091e-09	184.04	2	SK(1)QAILAAQR	0.56411	6	0.773952	1.06073	1.01676	0.949882	1.08696	1.11172	0.916039	0.980195	1.06213	0.949285	0.999503	1.09285	0.845	1.082	0.957	1.001	1.087	1.017	1.077	0.359547
O60869	50	K	Endothelial differentiation-related factor 1 OS=Homo sapiens OX=9606 GN=EDF1 PE=1 SV=1	EDF1	1	1.37247e-25	216.04	2	WAAGQNK(1)QHSITK	-0.50487	6	1.1077	0.837285	1.28481	0.79968	0.831578	1.13895	0.916039	0.980195	1.06213	0.949285	0.999503	1.09285	1.209	0.854	1.21	0.842	0.832	1.042	0.83	0.261531
O60884	39	K	DnaJ homolog subfamily A member 2 OS=Homo sapiens OX=9606 GN=DNAJA2 PE=1 SV=1	DNAJA2	1	3.95216e-07	145.95	2	EYHPDK(1)NPNAGDK	0.4263	6	0.990734	0.99776	0.996321	1.48826	0.772894	0.754031	0.950128	1.01128	0.990675	1.0136	1.03761	0.996707	1.043	0.987	1.006	1.468	0.745	0.757	0.978	0.755832
O60885	1050	K	Bromodomain-containing protein 4 OS=Homo sapiens OX=9606 GN=BRD4 PE=1 SV=2	BRD4	1	6.54517e-10	174.23	3	HHK(1)SDPYSTGHLR	0.78974	5		0.611297	0.989803	1.304	0.978564	1.11634	0.933774	0.950935	0.879418	1.04263	1.05589	1.13735		0.643	1.126	1.251	0.927	0.982	1.191	0.456389
O60885	333	K	Bromodomain-containing protein 4 OS=Homo sapiens OX=9606 GN=BRD4 PE=1 SV=2	BRD4	1	2.02211e-05	123.99	3	K(1)DVPDSQQHPAPEK	-0.48747	4		0.751406	0.678844	1.54127		1.02848	0.933774	0.950935	0.879418	1.04263	1.05589	1.13735		0.79	0.772	1.478		0.904	1.525	0.252068
O60907	189	K	F-box-like/WD repeat-containing protein TBL1X OS=Homo sapiens OX=9606 GN=TBL1X PE=1 SV=3	TBL1X	1	9.11402e-07	40.394	4	LAQQQASAAAAAAAATAAATAATTTSAGVSHQNPSK(1)NR	0.34673	1				1			1.57611	0.721952	0.699685	1.68213	0.615496	0.704626				0.594
O60927	40	K	E3 ubiquitin-protein ligase PPP1R11 OS=Homo sapiens OX=9606 GN=PPP1R11 PE=1 SV=1	PPP1R11	1	2.0827e-06	91.939	3	K(1)VEWTSDTVDNEHMGR	1.6403	3			0.791688		1.38246	0.825855	1.06874	0.967473	0.950044	0.984468	0.933931	1.09534			0.833		1.48	0.754	1.341
O60927	31	K	E3 ubiquitin-protein ligase PPP1R11 OS=Homo sapiens OX=9606 GN=PPP1R11 PE=1 SV=1	PPP1R11	1	0.00369058	105.22	2	SLTIK(1)LR	0.18494	6	1.13862	0.948688	0.789282	1.45583	0.748972	0.918611	1.06874	0.967473	0.950044	0.984468	0.933931	1.09534	1.065	0.981	0.831	1.479	0.802	0.839	1.084	0.839062
O60927	59	K	E3 ubiquitin-protein ligase PPP1R11 OS=Homo sapiens OX=9606 GN=PPP1R11 PE=1 SV=1	PPP1R11	1	4.74033e-06	163.59	2	SSK(1)CCCIYEKPR	-0.25954	2	1.3331			0.666896			1.06874	0.967473	0.950044	0.984468	0.933931	1.09534	1.247			0.677			0.543
O60934	435	K	Nibrin OS=Homo sapiens OX=9606 GN=NBN PE=1 SV=1	NBN	1	0.00125731	67.887	2	IPNYQLSPTK(1)LPSINK	-1.8397	1		1					0.872313	0.924272	1.12359	0.996938	1.0039	1.07899		1.082
O60934	441	K	Nibrin OS=Homo sapiens OX=9606 GN=NBN PE=1 SV=1	NBN	1	0.00860307	77.072	2	LPSINK(1)SK	-1.0947	5	1.24384	0.922254	0.809904		0.920825	1.10318	0.872313	0.924272	1.12359	0.996938	1.0039	1.07899	1.426	0.998	0.721		0.917	1.022	0.925	0.883504
O60942	220	K	mRNA-capping enzyme OS=Homo sapiens OX=9606 GN=RNGTT PE=1 SV=1	RNGTT	1	7.68468e-05	110.88	2	ESEPGSSASFGK(1)R	0.026977	1				1
O75131	262	K	Copine-3 OS=Homo sapiens OX=9606 GN=CPNE3 PE=1 SV=1	CPNE3	1	0.0238275	56.202	2	SYK(1)NSGVISVK	1.2221	1				1			0.989022	0.964432	1.07556	1.02188	0.941601	1.0075				0.979
O75175	72	K	CCR4-NOT transcription complex subunit 3 OS=Homo sapiens OX=9606 GN=CNOT3 PE=1 SV=1	CNOT3	1	1.91811e-05	153.33	2	TWVASNEIK(1)DK	0.68582	9	1.05709	1.0414	0.850882	1.22354	0.864483	0.962607	0.871598	1.0592	1.04401	0.939824	1.06519	1.02018	1.213	0.983	0.815	1.302	0.812	0.944	1.016	0.96313
O75177	13	K	Calcium-responsive transactivator OS=Homo sapiens OX=9606 GN=SS18L1 PE=1 SV=2	SS18L1	1	6.99689e-06	168.05	2	GK(1)GEVTQQTIQK	0.22117	5	1.20144	1.0428	0.786047	1.28675		0.682956
O75347	51	K	Tubulin-specific chaperone A OS=Homo sapiens OX=9606 GN=TBCA PE=1 SV=3	TBCA	1	0.0348149	57.293	2	AEDGENYDIK(1)K	3.8265	1						1	1.04498	0.972604	0.97863	0.912469	0.994081	1.09723						0.911
O75347	52	K	Tubulin-specific chaperone A OS=Homo sapiens OX=9606 GN=TBCA PE=1 SV=3	TBCA	1	0.000179783	111.61	2	K(1)QAEILQESR	-0.49096	6	1.21325	0.962917	0.810148	0.962306	1.0395	1.01187	1.04498	0.972604	0.97863	0.912469	0.994081	1.09723	1.161	0.99	0.828	1.055	1.046	0.922	1.015	0.845154
O75362	574	K	Zinc finger protein 217 OS=Homo sapiens OX=9606 GN=ZNF217 PE=1 SV=1	ZNF217	1	0.000374561	78.816	2	DVTGSPPAK(1)QLK	-0.35038	5	0.517159	1.27562	0.900893		1.07058	1.23575			0.982428		1.00284	1.01473			0.917		1.068	1.218	1.246
O75362	565	K	Zinc finger protein 217 OS=Homo sapiens OX=9606 GN=ZNF217 PE=1 SV=1	ZNF217	1	4.37818e-11	117.41	2	FFDGAK(1)DVTGSPPAK	-0.34317	5		1.18568	0.930273	0.79699	1.09527	0.991787			0.982428		1.00284	1.01473			0.947		1.092	0.977	1.092
O75362	166	K	Zinc finger protein 217 OS=Homo sapiens OX=9606 GN=ZNF217 PE=1 SV=1	ZNF217	1	0.00410628	72.038	2	FK(1)EPWFLK	-0.14057	6	0.390987	1.14236	1.01361	1.00083	1.15481	1.2974			0.982428		1.00284	1.01473			1.032		1.152	1.279	1.178
O75362	348	K	Zinc finger protein 217 OS=Homo sapiens OX=9606 GN=ZNF217 PE=1 SV=1	ZNF217	1	1.38982e-07	179.31	2	GSCAGLSQEK(1)EK	1.5529	5	0.426486	1.20857	0.558743		1.10773	1.69847			0.982428		1.00284	1.01473			0.569		1.105	1.674	2.442
O75362	366	K	Zinc finger protein 217 OS=Homo sapiens OX=9606 GN=ZNF217 PE=1 SV=1	ZNF217	1	1.20857e-15	97.949	3	HSHGEAPSVDADPK(1)LPSSK	0.9062	4		0.79296	0.908396		1.08509	1.21355			0.982428		1.00284	1.01473			0.925		1.082	1.196	1.231
O75362	785	K	Zinc finger protein 217 OS=Homo sapiens OX=9606 GN=ZNF217 PE=1 SV=1	ZNF217	1	0.000597542	72.846	2	SAFPAQSK(1)SLPSAK	0.41495	6	0.591346	1.2429	1.17073	0.553649	1.3084	1.13298			0.982428		1.00284	1.01473			1.192		1.305	1.117	1.016
O75362	918	K	Zinc finger protein 217 OS=Homo sapiens OX=9606 GN=ZNF217 PE=1 SV=1	ZNF217	1	1.96431e-22	200.82	2	SASNTAAEFGEPLPK(1)R	-1.1136	4		1.32583		0.166228	1.34675	1.16119			0.982428		1.00284	1.01473					1.343	1.144
O75362	110	K	Zinc finger protein 217 OS=Homo sapiens OX=9606 GN=ZNF217 PE=1 SV=1	ZNF217	1	0.000315174	66.953	2	VEAEYLSPLDK(1)SQVR	-0.61374	1		1							0.982428		1.00284	1.01473
O75367	134	K	Core histone macro-H2A.1 OS=Homo sapiens OX=9606 GN=MACROH2A1 PE=1 SV=4	MACROH2A1	1	0.000103331	99.855	2	LEAIITPPPAK(1)K	-0.99664	6	0.914665	1.17008	0.793852	2.09377	0.594626	0.433008	1.01937	0.971999	0.948236	1.16195	0.953147	0.945305	0.897	1.204	0.837	1.802	0.624	0.458	0.982	0.684898
O75369	681	K	Filamin-B OS=Homo sapiens OX=9606 GN=FLNB PE=1 SV=2	FLNB	1	0.000719818	50.314	2	APLK(1)IFAQDGEGQR	-0.097442	2	1.22594			0.774062			1.19232	0.886416	1.00102	0.976615	0.924587	1.01904	1.028			0.793			0.771
P21333	120	K	Filamin-A OS=Homo sapiens OX=9606 GN=FLNA PE=1 SV=4	FLNA	1	0.0187871	54.584	2	ESIK(1)LVSIDSK	-1.6718	2		1.07215				0.927852	1.12078	0.959205	0.999757	0.922215	0.988228	1.00981		1.118				0.919	0.822
O75369	1979	K	Filamin-B OS=Homo sapiens OX=9606 GN=FLNB PE=1 SV=2	FLNB	1	0.00704508	76.85	2	EVGEHLVSIK(1)K	0.56706	1	1						1.19232	0.886416	1.00102	0.976615	0.924587	1.01904	0.839
O75369	495	K	Filamin-B OS=Homo sapiens OX=9606 GN=FLNB PE=1 SV=2	FLNB	1	0.0125252	66.664	2	GPK(1)GLEELVK	0.50113	1				1			1.19232	0.886416	1.00102	0.976615	0.924587	1.01904				1.024
O75369	1510	K	Filamin-B OS=Homo sapiens OX=9606 GN=FLNB PE=1 SV=2	FLNB	1	0.0233352	40.386	2	VK(1)VLPTYDASK	-0.034052	1	1						1.19232	0.886416	1.00102	0.976615	0.924587	1.01904	0.839
O75376	1334	K	Nuclear receptor corepressor 1 OS=Homo sapiens OX=9606 GN=NCOR1 PE=1 SV=2	NCOR1	1	0.0373397	58.916	2	AFEGAITK(1)GK	-0.64668	2		0.798957	1.20104				0.795604	1.02542	1.08657	0.888283	1.04061	1.16352		0.779	1.105
O75376	1313	K	Nuclear receptor corepressor 1 OS=Homo sapiens OX=9606 GN=NCOR1 PE=1 SV=2	NCOR1	1	4.727e-22	188.6	2	ATTESFEDGLK(1)YPK	0.62401	8	1.09346	0.560631	1.33803	1.55181	0.626212	0.829855	0.795604	1.02542	1.08657	0.888283	1.04061	1.16352	1.374	0.547	1.231	1.747	0.602	0.713	0.971	0.881247
O75376	1207	K	Nuclear receptor corepressor 1 OS=Homo sapiens OX=9606 GN=NCOR1 PE=1 SV=2	NCOR1	1	3.95289e-18	207.12	3	GREEAASK(1)GHVIYEGK	-0.22474	11	0.735026	0.996458	1.17283	0.555536	1.1056	1.43456	0.795604	1.02542	1.08657	0.888283	1.04061	1.16352	0.924	0.972	1.079	0.625	1.062	1.233	0.982	0.80283
O75376	551	K	Nuclear receptor corepressor 1 OS=Homo sapiens OX=9606 GN=NCOR1 PE=1 SV=2	NCOR1	0.999486	1.89598e-10	116.36	2	EK(0.999)DK(0.001)IDGTAEETEER	0.22243	6	1.52727	0.675178	1.03615	0.736353	0.662945	1.3621	0.795604	1.02542	1.08657	0.888283	1.04061	1.16352	1.92	0.658	0.954	0.829	0.637	1.171	0.747	0.57012
O75376	1532	K	Nuclear receptor corepressor 1 OS=Homo sapiens OX=9606 GN=NCOR1 PE=1 SV=2	NCOR1	1	4.80306e-09	84.309	4	ESIPAK(1)SPVPGVDPVVSHSPFDPHHR	0.059408	4	1.86134		0.693223		0.824234	0.621205	0.795604	1.02542	1.08657	0.888283	1.04061	1.16352	2.34		0.638		0.792	0.534	0.445	0.45106
O75376	344	K	Nuclear receptor corepressor 1 OS=Homo sapiens OX=9606 GN=NCOR1 PE=1 SV=2	NCOR1	1	2.47803e-11	170.85	2	EYYEK(1)QFPEIR	-0.77592	6	1.03709	1.00928	0.924545	1.22961	0.846243	0.95324	0.795604	1.02542	1.08657	0.888283	1.04061	1.16352	1.304	0.984	0.851	1.384	0.813	0.819	0.961	0.806481
O75376	1400	K	Nuclear receptor corepressor 1 OS=Homo sapiens OX=9606 GN=NCOR1 PE=1 SV=2	NCOR1	1	2.52203e-17	222.48	2	FDNNSGQSAIK(1)HNVK	-0.67852	7		0.89755	0.865373		0.888574	1.3485	0.795604	1.02542	1.08657	0.888283	1.04061	1.16352		0.875	0.796		0.854	1.159	1.205	0.386318
O75376	1345	K	Nuclear receptor corepressor 1 OS=Homo sapiens OX=9606 GN=NCOR1 PE=1 SV=2	NCOR1	1	0.000343858	77.157	3	GKPYDGITTIK(1)EMGR	-0.1335	3			0.935929		1.06407		0.795604	1.02542	1.08657	0.888283	1.04061	1.16352			0.861		1.023		1.188
O75376	1439	K	Nuclear receptor corepressor 1 OS=Homo sapiens OX=9606 GN=NCOR1 PE=1 SV=2	NCOR1	1	0.00118175	85.813	2	GKYEDVK(1)AGETVR	0.63604	6	0.743595	1.04496	1.35052	0.503529	0.956147	1.40125	0.795604	1.02542	1.08657	0.888283	1.04061	1.16352	0.935	1.019	1.243	0.567	0.919	1.204	0.841	0.419961
O75376	1152	K	Nuclear receptor corepressor 1 OS=Homo sapiens OX=9606 GN=NCOR1 PE=1 SV=2	NCOR1	1	3.87127e-22	174.72	2	GTPTSK(1)ISVESIPSLR	-0.39538	11	1.29425	0.985013	1.00432	0.510734	1.06354	1.14214	0.795604	1.02542	1.08657	0.888283	1.04061	1.16352	1.627	0.961	0.924	0.575	1.022	0.982	0.734	0.304773
O75376	965	K	Nuclear receptor corepressor 1 OS=Homo sapiens OX=9606 GN=NCOR1 PE=1 SV=2	NCOR1	1	2.18073e-06	97.084	3	HIK(1)AMHESALLEEQR	-0.37399	3		0.87784	1.12904			0.993124	0.795604	1.02542	1.08657	0.888283	1.04061	1.16352		0.856	1.039			0.854	0.901
O75376	683	K	Nuclear receptor corepressor 1 OS=Homo sapiens OX=9606 GN=NCOR1 PE=1 SV=2	NCOR1	1	3.84068e-07	162.21	3	HNLDNLLQQHK(1)QK	0.20127	6	0.842328	0.978399	1.14114	0.617906	1.05977	1.36046	0.795604	1.02542	1.08657	0.888283	1.04061	1.16352	1.059	0.954	1.05	0.696	1.018	1.169	0.941	0.630487
O75376	1518	K	Nuclear receptor corepressor 1 OS=Homo sapiens OX=9606 GN=NCOR1 PE=1 SV=2	NCOR1	1	0.000315678	99.305	2	K(1)STLTPTQR	-0.69669	6	0.427015	0.998929	1.31294	0.532374	1.22832	1.50041	0.795604	1.02542	1.08657	0.888283	1.04061	1.16352	0.537	0.974	1.208	0.599	1.18	1.29	1.129	0.739305
O75376	1366	K	Nuclear receptor corepressor 1 OS=Homo sapiens OX=9606 GN=NCOR1 PE=1 SV=2	NCOR1	1	0.00104382	88.181	2	K(1)TPEVVQSTR	-2.3747	5	0.826924	1.00893	0.897427		0.890963	1.37576	0.795604	1.02542	1.08657	0.888283	1.04061	1.16352	1.039	0.984	0.826		0.856	1.182	1.073	0.705907
O75376	1998	K	Nuclear receptor corepressor 1 OS=Homo sapiens OX=9606 GN=NCOR1 PE=1 SV=2	NCOR1	1	0.013226	45.826	2	LQTYQPEVVK(1)ANQAENDPTR	0.6756	1				1			0.795604	1.02542	1.08657	0.888283	1.04061	1.16352				1.126
O75376	670	K	Nuclear receptor corepressor 1 OS=Homo sapiens OX=9606 GN=NCOR1 PE=1 SV=2	NCOR1	1	0.0028406	84.064	2	NFYFNYK(1)R	0.38103	4			0.968405	1.74192	0.461684	0.82799	0.795604	1.02542	1.08657	0.888283	1.04061	1.16352			0.891	1.961	0.444	0.712	1.166
O75376	652	K	Nuclear receptor corepressor 1 OS=Homo sapiens OX=9606 GN=NCOR1 PE=1 SV=2	NCOR1	1	4.77057e-05	96.957	2	NWAAIAK(1)MVGTK	0.027213	6		0.524757	0.944037	1.70106	0.648002	1.18215	0.795604	1.02542	1.08657	0.888283	1.04061	1.16352		0.512	0.869	1.915	0.623	1.016	1.716	0.386218
O75376	513	K	Nuclear receptor corepressor 1 OS=Homo sapiens OX=9606 GN=NCOR1 PE=1 SV=2	NCOR1	1	1.41326e-10	120.75	3	PSQEEK(1)VEEKEEDK	2.5965	9		0.812525	1.06465	1.00303	0.972622	1.14718	0.795604	1.02542	1.08657	0.888283	1.04061	1.16352		0.792	0.98	1.129	0.935	0.986	1.147	0.28358
O75376	2325	K	Nuclear receptor corepressor 1 OS=Homo sapiens OX=9606 GN=NCOR1 PE=1 SV=2	NCOR1	0.884259	0.0560109	49.155	4	REEGDPSPHSGGVCK(0.116)PK(0.884)LISK	-6.8202	1						1	0.795604	1.02542	1.08657	0.888283	1.04061	1.16352						0.859
O75376	663	K	Nuclear receptor corepressor 1 OS=Homo sapiens OX=9606 GN=NCOR1 PE=1 SV=2	NCOR1	1	6.22681e-13	199.59	2	SEAQCK(1)NFYFNYK	-1.0079	6	1.45556	0.904268	0.72912	1.43172	0.60497	0.874361	0.795604	1.02542	1.08657	0.888283	1.04061	1.16352	1.83	0.882	0.671	1.612	0.581	0.751	0.87	0.753902
O75376	1226	K	Nuclear receptor corepressor 1 OS=Homo sapiens OX=9606 GN=NCOR1 PE=1 SV=2	NCOR1	1	1.34665e-16	159.12	2	SGHILSYDNIK(1)NAR	-1.2498	2		1.31115			0.688849		0.795604	1.02542	1.08657	0.888283	1.04061	1.16352		1.279			0.662		0.518
O75376	1412	K	Nuclear receptor corepressor 1 OS=Homo sapiens OX=9606 GN=NCOR1 PE=1 SV=2	NCOR1	1	0.000824406	72.365	2	SLITGPSK(1)LSR	-0.25464	5	0.580709	1.00947	1.09459		1.03033	1.28489	0.795604	1.02542	1.08657	0.888283	1.04061	1.16352	0.73	0.984	1.007		0.99	1.104	1.154	0.3553
O75376	1468	K	Nuclear receptor corepressor 1 OS=Homo sapiens OX=9606 GN=NCOR1 PE=1 SV=2	NCOR1	1	5.23455e-07	70.831	3	STLHEAPK(1)AQLSPGIYDDTSAR	0.46399	4		0.915579	0.84291		1.02466	1.21686	0.795604	1.02542	1.08657	0.888283	1.04061	1.16352		0.893	0.776		0.985	1.046	1.217	0.121802
O75376	1244	K	Nuclear receptor corepressor 1 OS=Homo sapiens OX=9606 GN=NCOR1 PE=1 SV=2	NCOR1	1	0.000333187	118.06	2	TAHEISLK(1)R	-0.20944	6	0.730729	1.07851	1.05059	0.603195	1.1675	1.36948	0.795604	1.02542	1.08657	0.888283	1.04061	1.16352	0.918	1.052	0.967	0.679	1.122	1.177	1.014	0.943746
O75376	1875	K	Nuclear receptor corepressor 1 OS=Homo sapiens OX=9606 GN=NCOR1 PE=1 SV=2	NCOR1	1	0.0386788	66.087	2	TLEVEK(1)R	0.11501	5	1.20557		1.00126	1.02792	0.75225	1.013	0.795604	1.02542	1.08657	0.888283	1.04061	1.16352	1.515		0.921	1.157	0.723	0.871	0.753	0.365847
O75376	1511	K	Nuclear receptor corepressor 1 OS=Homo sapiens OX=9606 GN=NCOR1 PE=1 SV=2	NCOR1	1	1.61753e-44	199.3	2	TSDVTISSNK(1)STNHER	0.46496	5	0.831374	0.644441	1.11975		0.958722	1.44571	0.795604	1.02542	1.08657	0.888283	1.04061	1.16352	1.045	0.628	1.031		0.921	1.243	1.2	0.475921
O75376	201	K	Nuclear receptor corepressor 1 OS=Homo sapiens OX=9606 GN=NCOR1 PE=1 SV=2	NCOR1	1	0.00555807	67.464	2	VEQQILK(1)LK	-2.2182	1				1			0.795604	1.02542	1.08657	0.888283	1.04061	1.16352				1.126
O75376	835	K	Nuclear receptor corepressor 1 OS=Homo sapiens OX=9606 GN=NCOR1 PE=1 SV=2	NCOR1	1	5.73655e-05	94.507	3	VPENHASK(1)VEGDNTK	1.2581	7		0.82934	0.943334	1.43424	0.266122	1.52697	0.795604	1.02542	1.08657	0.888283	1.04061	1.16352		0.809	0.868	1.615	0.256	1.312	1.265	0.973494
O75376	2127	K	Nuclear receptor corepressor 1 OS=Homo sapiens OX=9606 GN=NCOR1 PE=1 SV=2	NCOR1	1	0.0033691	72.922	2	VSPENLVDK(1)SR	-2.6664	5	0.901953		0.778495	1.60456	0.677751	1.03724	0.795604	1.02542	1.08657	0.888283	1.04061	1.16352	1.134		0.716	1.806	0.651	0.891	1.206	0.796872
O75391	166	K	Sperm-associated antigen 7 OS=Homo sapiens OX=9606 GN=SPAG7 PE=1 SV=2	SPAG7	1	0.00104268	83.358	2	DK(1)YSHLIGK	0.36988	6	0.633013	1.13585	0.861074	0.884064	1.08013	1.40586	0.798371	1.08465	1.16422	0.830473	1.07362	1.04866	0.793	1.047	0.74	1.065	1.006	1.341	1.322	0.108935
O75391	173	K	Sperm-associated antigen 7 OS=Homo sapiens OX=9606 GN=SPAG7 PE=1 SV=2	SPAG7	1	0.000807058	83.358	2	YSHLIGK(1)GAAK	-0.84344	3		1.10826	0.832495		1.05924		0.798371	1.08465	1.16422	0.830473	1.07362	1.04866		1.022	0.715		0.987		1.136
O75400	810	K	Pre-mRNA-processing factor 40 homolog A OS=Homo sapiens OX=9606 GN=PRPF40A PE=1 SV=2	PRPF40A	1	1.31706e-06	69.201	3	DFMHVLEHECQHHHSK(1)NK	1.841	4	1.12361	1.14212	0.872913	0.86136			1.06035	0.952617	0.958044	1.0667	0.953892	1.0084	1.06	1.199	0.911	0.808			0.765
O75446	91	K	Histone deacetylase complex subunit SAP30 OS=Homo sapiens OX=9606 GN=SAP30 PE=1 SV=1	SAP30	1	0.00406044	87.251	2	IQK(1)SISQK	-1.9746	5	1.30552	0.856695	0.803635	1.3801	0.654049				0.982858	1.01714					0.818	1.357			1.659
O75475	407	K	PC4 and SFRS1-interacting protein OS=Homo sapiens OX=9606 GN=PSIP1 PE=1 SV=1	PSIP1	1	0.00828137	43.168	2	FK(1)VSQVIMEK	-2.1458	1						1	1.02647	0.874962	0.956369	1.04273	0.956369	1.1431						0.875
P51858	21	K	Hepatoma-derived growth factor OS=Homo sapiens OX=9606 GN=HDGF PE=1 SV=1	HDGF	1	0.000194251	113.7	3	MK(1)GYPHWPAR	-0.013956	9	0.856883	0.780588	0.926454	1.55505	0.548856	1.33217	1.10284	0.888642	0.927386	1.17507	0.907068	0.998992	0.777	0.878	0.999	1.323	0.605	1.334	1.229	0.611517
O75475	189	K	PC4 and SFRS1-interacting protein OS=Homo sapiens OX=9606 GN=PSIP1 PE=1 SV=1	PSIP1	1	0.0046343	78.816	2	PAATEVK(1)IPK	-0.7039	3		0.947432		1.48797	0.5646		1.02647	0.874962	0.956369	1.04273	0.956369	1.1431		1.083		1.427	0.59		0.931
O75533	240	K	Splicing factor 3B subunit 1 OS=Homo sapiens OX=9606 GN=SF3B1 PE=1 SV=3	SF3B1	1	2.40519e-05	98.167	2	AK(1)GSETPGATPGSK	1.585	3			0.702176	1.4801		0.817726	0.959661	0.981853	1.02621	0.991826	1.00504	1.03541			0.684	1.492		0.79	1.668
O75533	252	K	Splicing factor 3B subunit 1 OS=Homo sapiens OX=9606 GN=SF3B1 PE=1 SV=3	SF3B1	1	1.15728e-13	89.913	3	GSETPGATPGSK(1)IWDPTPSHTPAGAATPGR	1.6636	6	0.962789	0.883649	0.94344	1.23181	0.944333	1.03398	0.959661	0.981853	1.02621	0.991826	1.00504	1.03541	1.003	0.9	0.919	1.242	0.94	0.999	1.127	0.279429
O75533	333	K	Splicing factor 3B subunit 1 OS=Homo sapiens OX=9606 GN=SF3B1 PE=1 SV=3	SF3B1	1	2.05238e-22	163.93	2	GGDSIGETPTPGASK(1)R	1.3065	6	1.23465	1.10631	0.938227	1.13094	0.734539	0.855331	0.959661	0.981853	1.02621	0.991826	1.00504	1.03541	1.287	1.127	0.914	1.14	0.731	0.826	0.81	0.258015
O75533	120	K	Splicing factor 3B subunit 1 OS=Homo sapiens OX=9606 GN=SF3B1 PE=1 SV=3	SF3B1	1	0.0228816	62.271	2	IADREDEYK(1)K	0.88233	2		1.09683				0.903171	0.959661	0.981853	1.02621	0.991826	1.00504	1.03541		1.117				0.872	0.781
O75533	6	K	Splicing factor 3B subunit 1 OS=Homo sapiens OX=9606 GN=SF3B1 PE=1 SV=3	SF3B1	1	1.0138e-07	114.93	2	IAK(1)THEDIEAQIR	0.10938	7		0.979084	0.679126		1.12668	1.21511	0.959661	0.981853	1.02621	0.991826	1.00504	1.03541		0.997	0.662		1.121	1.174	1.383	0.235967
O75533	214	K	Splicing factor 3B subunit 1 OS=Homo sapiens OX=9606 GN=SF3B1 PE=1 SV=3	SF3B1	1	1.18454e-35	209.84	3	K(1)LSSWDQAETPGHTPSLR	0.098331	12	0.939227	0.897108	1.03502	1.40521	0.760943	0.962493	0.959661	0.981853	1.02621	0.991826	1.00504	1.03541	0.979	0.914	1.009	1.417	0.757	0.93	1.07	0.867358
O75533	146	K	Splicing factor 3B subunit 1 OS=Homo sapiens OX=9606 GN=SF3B1 PE=1 SV=3	SF3B1	1	0.0452383	40.502	2	TPDPK(1)MNAR	-0.017476	1				1			0.959661	0.981853	1.02621	0.991826	1.00504	1.03541				1.008
O75534	758	K	Cold shock domain-containing protein E1 OS=Homo sapiens OX=9606 GN=CSDE1 PE=1 SV=2	CSDE1	1	0.000560447	88.24	2	LK(1)NITLDDASAPR	-0.52849	6	0.854299	1.25048	1.08886	0.730455	1.00013	1.07578	0.890954	1.03066	1.0876	0.814078	1.04611	1.1306	0.959	1.213	1.001	0.897	0.956	0.952	0.884	0.190179
O75534	277	K	Cold shock domain-containing protein E1 OS=Homo sapiens OX=9606 GN=CSDE1 PE=1 SV=2	CSDE1	1	0.00391277	52.837	2	VPSK(1)NQNDPLPGR	-0.18841	2		1.08352				0.916483	0.890954	1.03066	1.0876	0.814078	1.04611	1.1306		1.051				0.811	0.772
O75554	290	K	WW domain-binding protein 4 OS=Homo sapiens OX=9606 GN=WBP4 PE=1 SV=1	WBP4	1	3.75973e-06	157.74	2	K(1)SNPYGEWQEIK	0.0077833	6	1.26841	0.975494	0.770453	1.26232	0.861322	0.861999
O75674	5	K	TOM1-like protein 1 OS=Homo sapiens OX=9606 GN=TOM1L1 PE=1 SV=2	TOM1L1	1	0.00421836	96.51	2	AFGK(1)SHR	2.0639	6	1.15503	0.981152	0.899991	1.42517	0.764151	0.774507	0.984322	1.03392	0.992856	1.18832	0.999056	0.801524	1.173	0.949	0.906	1.199	0.765	0.966	0.968	0.790763
O75676	759	K	Ribosomal protein S6 kinase alpha-4 OS=Homo sapiens OX=9606 GN=RPS6KA4 PE=1 SV=1	RPS6KA4	1	0.000229061	105.36	2	APVASK(1)GAPR	0.77624	5		1.16698	1.04112	0.598424	1.17382	1.01965	0.546967	1.36072	1.19655	0.536655	1.26591	1.0932		0.858	0.87	1.115	0.927	0.933	1.148	0.185211
O75676	729	K	Ribosomal protein S6 kinase alpha-4 OS=Homo sapiens OX=9606 GN=RPS6KA4 PE=1 SV=1	RPS6KA4	1	0.00030311	102.46	2	SVENAPLAK(1)R	2.5927	4		1.47257	1.00538	0.206073	1.31598		0.546967	1.36072	1.19655	0.536655	1.26591	1.0932		1.082	0.84	0.384	1.04		0.741	0.507655
O75691	2510	K	Small subunit processome component 20 homolog OS=Homo sapiens OX=9606 GN=UTP20 PE=1 SV=3	UTP20	1	0.00116244	81.099	2	K(1)HLPEPVAIK	-0.8832	5	1.18794		0.886244	1.30805	0.712874	0.904885	1.03404	0.880018	1.01777	1.13064	0.943642	0.993897	1.149		0.871	1.157	0.755	0.91	0.931	0.712806
O75717	971	K	WD repeat and HMG-box DNA-binding protein 1 OS=Homo sapiens OX=9606 GN=WDHD1 PE=1 SV=1	WDHD1	1	0.00787063	65.879	2	PK(1)QASAASYFQK	0.1678	2					0.808133	1.19187	0.54749	1.16265	1.19108	0.495023	1.30899	1.29476					0.617	0.921
O75717	941	K	WD repeat and HMG-box DNA-binding protein 1 OS=Homo sapiens OX=9606 GN=WDHD1 PE=1 SV=1	WDHD1	1	0.0093087	47.57	2	STNILDNMGK(1)SSK	0.30994	2		1.14784			0.852163		0.54749	1.16265	1.19108	0.495023	1.30899	1.29476		0.987			0.651		0.66
O75821	148	K	Eukaryotic translation initiation factor 3 subunit G OS=Homo sapiens OX=9606 GN=EIF3G PE=1 SV=2	EIF3G	1	8.68921e-06	96.313	2	EDLNCQEEEDPMNK(1)LK	2.1603	1	1						0.95268	1.00915	1.04871	0.863809	1.04623	1.07941	1.05
O75821	209	K	Eukaryotic translation initiation factor 3 subunit G OS=Homo sapiens OX=9606 GN=EIF3G PE=1 SV=2	EIF3G	1	4.28142e-09	130.78	2	LPGELEPVQATQNK(1)TGK	0.53867	9		0.967368	0.895088	1.11639	1.0363	0.984854	0.95268	1.00915	1.04871	0.863809	1.04623	1.07941		0.959	0.854	1.292	0.991	0.912	1.175	0.365104
O75821	153	K	Eukaryotic translation initiation factor 3 subunit G OS=Homo sapiens OX=9606 GN=EIF3G PE=1 SV=2	EIF3G	1	0.00430119	84.368	2	GQK(1)IVSCR	0.37481	3	0.590757		1.11065			1.29859	0.95268	1.00915	1.04871	0.863809	1.04623	1.07941	0.62		1.059			1.203	1.433
O75822	224	K	Eukaryotic translation initiation factor 3 subunit J OS=Homo sapiens OX=9606 GN=EIF3J PE=1 SV=2	EIF3J	1	0.00104096	72.038	2	K(1)GVVPGGGLK	-0.1052	7	1.27653	1.07022	1.04438	1.12423	0.484635		1.12235	0.90993	1.12766	0.994695	0.869008	0.976356	1.137	1.176	0.926	1.13	0.558		0.782	0.36017
O75822	122	K	Eukaryotic translation initiation factor 3 subunit J OS=Homo sapiens OX=9606 GN=EIF3J PE=1 SV=2	EIF3J	1	9.06688e-06	101.64	2	K(1)LQEESDLELAK	-0.16282	6	0.975133	0.927498	0.871733	1.38492	0.870243	0.970478	1.12235	0.90993	1.12766	0.994695	0.869008	0.976356	0.869	1.019	0.773	1.392	1.001	0.994	1.273	0.161404
O75909	357	K	Cyclin-K OS=Homo sapiens OX=9606 GN=CCNK PE=1 SV=2	CCNK	1	0.00941462	56.473	4	IPK(1)IETTHPPLPPAHPPPDR	0.74447	1				1			0.975698	1.02572	1.01129	0.937677	1.0424	1.00721				1.066
O75915	151	K	PRA1 family protein 3 OS=Homo sapiens OX=9606 GN=ARL6IP5 PE=1 SV=1	ARL6IP5	1	0.00236453	101.64	2	LENK(1)MEGIGLK	-2.702	2				1			0.974548	1.14692	0.973035	0.911932	0.969656	1.02391				1.097
O75937	246	K	DnaJ homolog subfamily C member 8 OS=Homo sapiens OX=9606 GN=DNAJC8 PE=1 SV=2	DNAJC8	1	0.00407632	100.84	2	TFLRPPK(1)VK	-0.33898	6	0.785858	0.934963	1.0368	1.02147	1.06678	1.15413	0.935989	1.03219	1.0702	0.924402	1.01051	1.02672	0.84	0.906	0.969	1.105	1.056	1.124	1.21	0.0132695
O75940	177	K	Survival of motor neuron-related-splicing factor 30 OS=Homo sapiens OX=9606 GN=SMNDC1 PE=1 SV=1	SMNDC1	1	0.00174664	81.32	2	VK(1)WQQFNNR	2.1512	3		1.02016			0.906166	1.07367	1.01614	1.08955	1.0454	0.966176	1.10032	0.782414		0.936			0.824	1.372	1.173
O76021	373	K	Ribosomal L1 domain-containing protein 1 OS=Homo sapiens OX=9606 GN=RSL1D1 PE=1 SV=3	RSL1D1	1	2.4842e-05	77.696	2	ATNESEDEIPQLVPIGK(1)K	-1.5232	1				1			1.09153	0.874391	1.01002	1.12893	0.944593	0.950531				0.886
O76021	468	K	Ribosomal L1 domain-containing protein 1 OS=Homo sapiens OX=9606 GN=RSL1D1 PE=1 SV=3	RSL1D1	1	0.00029552	122.44	2	FFTTPSK(1)SVR	1.4159	6	1.09886	0.911997	0.906939	1.35793	0.896197	0.828081	1.09153	0.874391	1.01002	1.12893	0.944593	0.950531	1.007	1.043	0.898	1.203	0.949	0.871	1.025	0.876748
O76021	408	K	Ribosomal L1 domain-containing protein 1 OS=Homo sapiens OX=9606 GN=RSL1D1 PE=1 SV=3	RSL1D1	1	0.0006104	92.732	2	K(1)ALPASETPK	0.33589	6	1.07594	1.00508	0.90607	1.19405	0.93783	0.881035	1.09153	0.874391	1.01002	1.12893	0.944593	0.950531	0.986	1.149	0.897	1.058	0.993	0.927	0.982	0.870497
O76021	461	K	Ribosomal L1 domain-containing protein 1 OS=Homo sapiens OX=9606 GN=RSL1D1 PE=1 SV=3	RSL1D1	0.99999	3.88869e-05	117.21	2	KPEAK(1)FFTTPSK	-0.36436	5	1.14272	1.0243	0.806362	1.17061		0.856017	1.09153	0.874391	1.01002	1.12893	0.944593	0.950531	1.047	1.171	0.798	1.037		0.901	0.964	0.875164
O76021	395	K	Ribosomal L1 domain-containing protein 1 OS=Homo sapiens OX=9606 GN=RSL1D1 PE=1 SV=3	RSL1D1	1	0.00283909	74.524	2	SPAK(1)SPNPSTPR	1.0378	5	1.22024	0.793354	0.567438	1.77602	0.642948		1.09153	0.874391	1.01002	1.12893	0.944593	0.950531	1.118	0.907	0.562	1.573	0.681		1.307	0.624382
O76041	811	K	Nebulette OS=Homo sapiens OX=9606 GN=NEBL PE=1 SV=1	NEBL	1	8.2765e-05	92.445	2	K(1)NTQVVSDAAYK	-1.9731	1				1
O94776	531	K	Metastasis-associated protein MTA2 OS=Homo sapiens OX=9606 GN=MTA2 PE=1 SV=1	MTA2	1	0.000187155	90.263	2	DLVAQAPLK(1)PK	0.12739	6	0.920423	0.810581	0.950041	1.56736	0.764936	0.986655	0.955768	0.980892	0.968975	0.950927	1.0438	1.09964	0.963	0.826	0.98	1.648	0.733	0.897	1.184	0.682648
O94776	533	K	Metastasis-associated protein MTA2 OS=Homo sapiens OX=9606 GN=MTA2 PE=1 SV=1	MTA2	0.99999	1.31108e-21	237.27	2	DLVAQAPLKPK(1)TPR	-0.886	12	1.15673	0.854462	0.885206	1.32962	0.867871	0.906115	0.955768	0.980892	0.968975	0.950927	1.0438	1.09964	1.21	0.871	0.914	1.398	0.831	0.824	1.019	0.99229
O94776	559	K	Metastasis-associated protein MTA2 OS=Homo sapiens OX=9606 GN=MTA2 PE=1 SV=1	MTA2	1	0.00125081	88.35	2	GLGGIMVK(1)R	-0.23963	6	0.813052	1.11867	1.04244	0.666256	1.12193	1.23765	0.955768	0.980892	0.968975	0.950927	1.0438	1.09964	0.851	1.14	1.076	0.701	1.075	1.126	0.946	0.713767
O94776	539	K	Metastasis-associated protein MTA2 OS=Homo sapiens OX=9606 GN=MTA2 PE=1 SV=1	MTA2	1	0.000827116	109.36	2	GTK(1)TPINR	0.21251	6	0.473767	0.85451	1.04709	1.02277	1.26763	1.33424	0.955768	0.980892	0.968975	0.950927	1.0438	1.09964	0.496	0.871	1.081	1.076	1.214	1.213	1.431	0.159039
O94776	618	K	Metastasis-associated protein MTA2 OS=Homo sapiens OX=9606 GN=MTA2 PE=1 SV=1	MTA2	1	0.000315424	109.88	2	K(1)ALTHLEMR	0.44575	5	0.927409	1.01452	1.02293	1.19552		0.839622	0.955768	0.980892	0.968975	0.950927	1.0438	1.09964	0.97	1.034	1.056	1.257		0.764	0.991	0.847856
O94776	611	K	Metastasis-associated protein MTA2 OS=Homo sapiens OX=9606 GN=MTA2 PE=1 SV=1	MTA2	1	3.49467e-11	164.22	3	LNPADAPNPVVFVATK(1)DTR	-0.24783	4		1.44728	0.661535	1.06335	0.82783		0.955768	0.980892	0.968975	0.950927	1.0438	1.09964		1.475	0.683	1.118	0.793		0.886	0.893429
O94776	522	K	Metastasis-associated protein MTA2 OS=Homo sapiens OX=9606 GN=MTA2 PE=1 SV=1	MTA2	0.999994	1.33463e-05	96.313	3	LPLATIVK(1)DLVAQAPLKPK	-0.34948	2				1.58444		0.415557	0.955768	0.980892	0.968975	0.950927	1.0438	1.09964				1.666		0.378
O94776	595	K	Metastasis-associated protein MTA2 OS=Homo sapiens OX=9606 GN=MTA2 PE=1 SV=1	MTA2	1	3.73158e-22	155.28	2	QK(1)LNPADAPNPVVFVATK	0.16182	6	0.637434	0.788633	0.89095	1.49924	1.0973	1.08644	0.955768	0.980892	0.968975	0.950927	1.0438	1.09964	0.667	0.804	0.919	1.577	1.051	0.988	1.513	0.0824538
O94776	460	K	Metastasis-associated protein MTA2 OS=Homo sapiens OX=9606 GN=MTA2 PE=1 SV=1	MTA2	1	1.19724e-16	192.14	2	QTFLLQTTK(1)LTR	-0.43182	6	1.10329	1.17233	1.02202	1.0363	1.01038	0.655685	0.955768	0.980892	0.968975	0.950927	1.0438	1.09964	1.154	1.195	1.055	1.09	0.968	0.596	0.78	0.211854
O94776	637	K	Metastasis-associated protein MTA2 OS=Homo sapiens OX=9606 GN=MTA2 PE=1 SV=1	MTA2	1	0.0329513	82.716	2	RPNLPLK(1)VK	-0.083327	1	1						0.955768	0.980892	0.968975	0.950927	1.0438	1.09964	1.046
O94776	508	K	Metastasis-associated protein MTA2 OS=Homo sapiens OX=9606 GN=MTA2 PE=1 SV=1	MTA2	1	6.06045e-10	158.37	2	TPLK(1)IHPLVR	-0.23601	12	1.1662	0.889285	0.895476	1.31681	0.823195	0.909035	0.955768	0.980892	0.968975	0.950927	1.0438	1.09964	1.22	0.907	0.924	1.385	0.789	0.827	0.984	0.850109
O94842	207	K	TOX high mobility group box family member 4 OS=Homo sapiens OX=9606 GN=TOX4 PE=1 SV=1	TOX4	1	0.00577491	72.038	2	TVVVEAGK(1)K	-2.1607	5		1.05494	0.916205	1.06583	0.765959	1.19707	0.712118	0.89254	1.28077	0.828642	1.10651	1.17942		1.182	0.715	1.286	0.692	1.015	1.052	0.877322
O94903	260	K	Pyridoxal phosphate homeostasis protein OS=Homo sapiens OX=9606 GN=PLPBP PE=1 SV=1	PLPBP	0.999823	0.00320968	72.846	2	KPTPDK(1)CAADVK	0.56718	1				1			1.13399	0.983233	0.924006	1.27461	0.87549	0.808668				0.785
O94906	137	K	Pre-mRNA-processing factor 6 OS=Homo sapiens OX=9606 GN=PRPF6 PE=1 SV=1	PRPF6	1	9.83733e-05	122.51	2	PK(1)IQQQFSDLK	0.062531	6	1.13706	0.877068	0.912863	1.28471	0.866607	0.92169	0.959559	0.95234	0.994783	1.05764	0.997272	1.03841	1.185	0.921	0.918	1.215	0.869	0.888	0.983	0.879937
O94906	178	K	Pre-mRNA-processing factor 6 OS=Homo sapiens OX=9606 GN=PRPF6 PE=1 SV=1	PRPF6	1	0.000402699	78.864	2	YEK(1)LTPVPDSFFAK	-0.16946	3		1.55172	0.385252	1.06303			0.959559	0.95234	0.994783	1.05764	0.997272	1.03841		1.629	0.387	1.005			0.997
O95782	6	K	AP-2 complex subunit alpha-1 OS=Homo sapiens OX=9606 GN=AP2A1 PE=1 SV=3	AP2A1	1	0.0521384	41.796	2	PAVSK(1)GDGMR	-0.84224	2	0.877296			1.1227			1.01987	1.00593	0.944331	1.0343	0.951992	1.04357	0.86			1.085			1.262
O94979	1109	K	Protein transport protein Sec31A OS=Homo sapiens OX=9606 GN=SEC31A PE=1 SV=3	SEC31A	0.980072	0.00153791	104.49	3	ITK(0.98)K(0.02)PIPDEHLILK	-2.3177	3	0.579374			1.87139	0.549241		1.03268	0.945059	0.976913	1.01621	0.976997	1.05215	0.561			1.842	0.562		2.143
O95149	34	K	Snurportin-1 OS=Homo sapiens OX=9606 GN=SNUPN PE=1 SV=1	SNUPN	1	0.00125856	51.531	2	SK(1)YSSLEQSER	2.4088	1						1		1.00156	0.998726			0.999716						1
O95218	54	K	Zinc finger Ran-binding domain-containing protein 2 OS=Homo sapiens OX=9606 GN=ZRANB2 PE=1 SV=2	ZRANB2	1	0.000687887	86.243	2	AGGTEIGK(1)TLAEK	-1.1398	5	0.701854	1.11954		0.905694	1.07961	1.19329	0.926314	0.967332	0.958619	1.15548	0.968873	1.02339	0.758	1.157		0.784	1.114	1.166	1.067	0.771835
O95218	137	K	Zinc finger Ran-binding domain-containing protein 2 OS=Homo sapiens OX=9606 GN=ZRANB2 PE=1 SV=2	ZRANB2	1	0.000236922	106.35	2	GK(1)AVGPASILK	0.13379	6	1.07859	0.855029	0.862188	1.39959	0.879631	0.924969	0.926314	0.967332	0.958619	1.15548	0.968873	1.02339	1.164	0.884	0.899	1.211	0.908	0.904	1.026	0.86419
O95218	46	K	Zinc finger Ran-binding domain-containing protein 2 OS=Homo sapiens OX=9606 GN=ZRANB2 PE=1 SV=2	ZRANB2	1	0.00995552	85.622	2	MMK(1)AGGTEIGK	-0.66245	5		0.959335	1.04995			0.990711	0.926314	0.967332	0.958619	1.15548	0.968873	1.02339		0.992	1.095			0.968	0.928
O95218	18	K	Zinc finger Ran-binding domain-containing protein 2 OS=Homo sapiens OX=9606 GN=ZRANB2 PE=1 SV=2	ZRANB2	1	9.1618e-06	130.79	2	VSDGDWICPDK(1)K	0.33184	6	1.2436	0.991711	0.724225	1.28925	0.965705	0.785509	0.926314	0.967332	0.958619	1.15548	0.968873	1.02339	1.343	1.025	0.755	1.116	0.997	0.768	0.923	0.760345
O95218	95	K	Zinc finger Ran-binding domain-containing protein 2 OS=Homo sapiens OX=9606 GN=ZRANB2 PE=1 SV=2	ZRANB2	1	0.00829747	96.51	2	YAK(1)LEER	-0.088923	5	0.468812	1.09094	1.04635	1.26508		1.12882	0.926314	0.967332	0.958619	1.15548	0.968873	1.02339	0.506	1.128	1.092	1.095		1.103	1.209	0.510326
O95239	593	K	Chromosome-associated kinesin KIF4A OS=Homo sapiens OX=9606 GN=KIF4A PE=1 SV=3	KIF4A	1	0.00801406	78.932	2	DANQAK(1)LSER	0.48986	4		1.19491	0.931555		0.919053	0.954483	0.326422	1.30871	1.21433	0.269091	1.34326	1.53819		0.913	0.767		0.684	0.621	0.777	0.128846
O95292	147	K	Vesicle-associated membrane protein-associated protein B/C OS=Homo sapiens OX=9606 GN=VAPB PE=1 SV=3	VAPB	1	5.94798e-12	115.35	2	IISTTASK(1)TETPIVSK	-1.2787	4	1.44219		0.512075	1.43261		0.613126	1.05483	0.952465	0.962911	1.12431	0.945065	0.960419	1.367		0.532	1.274		0.638	1.007	0.932923
O95292	155	K	Vesicle-associated membrane protein-associated protein B/C OS=Homo sapiens OX=9606 GN=VAPB PE=1 SV=3	VAPB	0.999868	0.0025302	61.503	3	TETPIVSK(1)SLSSSLDDTEVKK	-0.80366	1				1			1.05483	0.952465	0.962911	1.12431	0.945065	0.960419				0.889
O95336	180	K	6-phosphogluconolactonase OS=Homo sapiens OX=9606 GN=PGLS PE=1 SV=2	PGLS	1	6.49976e-17	165.39	2	IVAPISDSPK(1)PPPQR	0.08787	5	1.57546	0.309936		1.1146			1.14623	0.865705	0.931975	1.19548	0.899438	0.961168	1.374	0.358		0.932			1.076
O95365	396	K	Zinc finger and BTB domain-containing protein 7A OS=Homo sapiens OX=9606 GN=ZBTB7A PE=1 SV=1	ZBTB7A	1	0.00145303	69.905	2	VIQGAGK(1)LPR	-0.14761	4		1.90773	0.573287			0.518988	0.651928	1.38902	0.716544	0.451872	1.35093	1.4397		1.373	0.8			0.36	0.331
O95373	1013	K	Importin-7 OS=Homo sapiens OX=9606 GN=IPO7 PE=1 SV=1	IPO7	1	0.000853064	93.467	2	MIEK(1)HGGYK	0.34735	2				1.24922		0.750784	1.00643	1.00985	1.02237	0.984879	0.978735	0.997729				1.268		0.752
O95391	114	K	Pre-mRNA-splicing factor SLU7 OS=Homo sapiens OX=9606 GN=SLU7 PE=1 SV=2	SLU7	1	0.000739901	93.467	2	ENSIITK(1)YR	-0.48461	5		1.11249	1.00961	0.94277	0.811708	1.12342
O95400	188	K	CD2 antigen cytoplasmic tail-binding protein 2 OS=Homo sapiens OX=9606 GN=CD2BP2 PE=1 SV=1	CD2BP2	1	0.0054583	76.85	2	K(1)GPGQPSSPQR	1.2513	4		1.09569		1.36886	0.887822	0.647625	1.17448	0.524019	0.928472	0.86784	1.24686	1.25832		2.091		1.577	0.712	0.515	0.447
O95400	26	K	CD2 antigen cytoplasmic tail-binding protein 2 OS=Homo sapiens OX=9606 GN=CD2BP2 PE=1 SV=1	CD2BP2	1	2.52401e-11	137.58	2	K(1)LVDPVAGSGGPGSR	0.074579	6	0.806361	1.14703	1.02779	0.938719	1.02369	1.0564	1.17448	0.524019	0.928472	0.86784	1.24686	1.25832	0.687	2.189	1.107	1.082	0.821	0.84	0.689	0.484638
O95400	5	K	CD2 antigen cytoplasmic tail-binding protein 2 OS=Homo sapiens OX=9606 GN=CD2BP2 PE=1 SV=1	CD2BP2	1	0.00217813	67.927	2	K(1)VTFQGVGDEEDEDEIIVPK	0.11351	3			1.28231	0.946495		0.771195	1.17448	0.524019	0.928472	0.86784	1.24686	1.25832			1.381	1.091		0.613	0.617
O95433	3	K	Activator of 90 kDa heat shock protein ATPase homolog 1 OS=Homo sapiens OX=9606 GN=AHSA1 PE=1 SV=1	AHSA1	1	0.000370273	100.84	2	AK(1)WGEGDPR	0.3849	4	0.819023	1.13675	0.938367			1.10586	0.96162	1.02937	1.0736	0.901331	1.0198	1.01428	0.852	1.104	0.874			1.09	1.155
O95433	203	K	Activator of 90 kDa heat shock protein ATPase homolog 1 OS=Homo sapiens OX=9606 GN=AHSA1 PE=1 SV=1	AHSA1	1	0.000275926	90.263	2	PVGVK(1)IPTCK	-0.57754	6	0.976668	0.965516	0.91174	1.04042	1.02903	1.07662	0.96162	1.02937	1.0736	0.901331	1.0198	1.01428	1.016	0.938	0.849	1.154	1.009	1.061	1.15	0.0959608
O95453	525	K	Poly(A)-specific ribonuclease PARN OS=Homo sapiens OX=9606 GN=PARN PE=1 SV=1	PARN	1	0.00590326	84.368	2	K(1)WTEDSWK	0.92285	4			0.986984	1.18094	0.832914	0.999162	0.931294	0.922738	1.08372	1.04036	0.970281	1.05161			0.911	1.135	0.858	0.95	1.077
O95487	836	K	Protein transport protein Sec24B OS=Homo sapiens OX=9606 GN=SEC24B PE=1 SV=2	SEC24B	1	1.90641e-08	94.63	2	SSTK(1)VVQHLGPATDFYK	0.0084653	2				1.46211		0.537893	1.05458	0.958145	0.943698	1.09839	0.971342	0.97384				1.331		0.552
O95568	282	K	Histidine protein methyltransferase 1 homolog OS=Homo sapiens OX=9606 GN=METTL18 PE=1 SV=1	METTL18	1	0.00531292	51.872	2	LVLSSEK(1)LFVK	-0.61799	2			0.467391	1.53261
O95684	275	K	Centrosomal protein 43 OS=Homo sapiens OX=9606 GN=CEP43 PE=1 SV=1	CEP43	1	0.000120351	66.485	2	K(1)QAGSLASLSDAPPLK	-1.8897	1	1						0.859986	1.13617	1.01702	0.647405	1.23557	1.10385	1.163
O95684	173	K	Centrosomal protein 43 OS=Homo sapiens OX=9606 GN=CEP43 PE=1 SV=1	CEP43	1	8.42039e-05	90.142	2	TSAQTTPSK(1)IPR	1.1711	2		1.04678		0.953222			0.859986	1.13617	1.01702	0.647405	1.23557	1.10385		0.921		1.472			1.598
O95721	169	K	Synaptosomal-associated protein 29 OS=Homo sapiens OX=9606 GN=SNAP29 PE=1 SV=1	SNAP29	1	0.000180875	87.895	2	K(1)LDDTDPVPR	-1.5399	1				1			0.984995	0.9781	1.01884	1.01153	0.992719	1.01382				0.989
P34932	388	K	Heat shock 70 kDa protein 4 OS=Homo sapiens OX=9606 GN=HSPA4 PE=1 SV=4	HSPA4	1	4.46594e-05	61.194	2	GCALQCAILSPAFK(1)VR	2.0493	1						1	0.975969	0.989149	1.049	0.983171	0.949897	1.05282						0.95
O95785	1175	K	Protein Wiz OS=Homo sapiens OX=9606 GN=WIZ PE=1 SV=2	WIZ	0.999999	0.00243348	125.5	2	K(1)LKPEQIR	0.45857	6	0.94425	0.970467	0.951951	0.986341	1.04273	1.10426	0.877818	0.981904	1.06716	0.940415	1.02524	1.10746	1.076	0.988	0.892	1.049	1.017	0.997	1.036	0.53326
O95785	988	K	Protein Wiz OS=Homo sapiens OX=9606 GN=WIZ PE=1 SV=2	WIZ	1	5.31243e-05	104.49	2	K(1)TPLALAGSPTPK	-0.018324	6	0.952334	1.06078	0.912237	1.04005	0.981792	1.0528	0.877818	0.981904	1.06716	0.940415	1.02524	1.10746	1.085	1.08	0.855	1.106	0.958	0.951	0.998	0.9846
O95785	1108	K	Protein Wiz OS=Homo sapiens OX=9606 GN=WIZ PE=1 SV=2	WIZ	1	7.16516e-09	144.51	2	PGGPPNPPGPSPK(1)ALAK	-0.91551	2				0.872972		1.12703	0.877818	0.981904	1.06716	0.940415	1.02524	1.10746				0.928		1.018
O95785	1322	K	Protein Wiz OS=Homo sapiens OX=9606 GN=WIZ PE=1 SV=2	WIZ	1	0.00290506	57.888	2	PGK(1)PGAGPAQVPR	-1.5366	1			1				0.877818	0.981904	1.06716	0.940415	1.02524	1.10746			0.937
O95785	1534	K	Protein Wiz OS=Homo sapiens OX=9606 GN=WIZ PE=1 SV=2	WIZ	1	0.00217439	105.81	2	QNINK(1)FER	0.14129	6	1.0126	1.04093	1.02991	0.974841	1.11324	0.828473	0.877818	0.981904	1.06716	0.940415	1.02524	1.10746	1.154	1.06	0.965	1.037	1.086	0.748	0.903	0.429922
O95785	1138	K	Protein Wiz OS=Homo sapiens OX=9606 GN=WIZ PE=1 SV=2	WIZ	1	1.07432e-07	160.98	2	SPSDLHISPLAK(1)K	-0.3292	6	1.01538	0.922412	0.877445	1.2124	0.887205	1.08516	0.877818	0.981904	1.06716	0.940415	1.02524	1.10746	1.157	0.939	0.822	1.289	0.865	0.98	1.074	0.685224
O95785	1382	K	Protein Wiz OS=Homo sapiens OX=9606 GN=WIZ PE=1 SV=2	WIZ	1	7.4714e-05	106.35	2	TYIQTELPFK(1)AK	0.26778	8	1.11515	1.27513	0.777767	1.13062	1.00443	0.696902	0.877818	0.981904	1.06716	0.940415	1.02524	1.10746	1.27	1.299	0.729	1.202	0.98	0.629	0.852	0.580375
O95786	851	K	Antiviral innate immune response receptor RIG-I OS=Homo sapiens OX=9606 GN=DDX58 PE=1 SV=2	DDX58	1	0.000683032	102.55	2	PK(1)QFSSFEK	0.2176	2		0.876412			1.12359		0.539349	1.31346	0.820326	0.787597	1.52247	1.0168		0.667			0.738		1.106
O95816	5	K	BAG family molecular chaperone regulator 2 OS=Homo sapiens OX=9606 GN=BAG2 PE=1 SV=1	BAG2	1	0.00404852	76.833	2	AQAK(1)INAK	2.8849	5	1.06486	1.12518	0.81671		0.94711	1.04614	1.10995	0.932814	1.03974	0.898391	0.972218	1.04688	0.959	1.206	0.785		0.974	0.999	1.003	0.915309
O95817	344	K	BAG family molecular chaperone regulator 3 OS=Homo sapiens OX=9606 GN=BAG3 PE=1 SV=3	BAG3	0.999999	7.46279e-05	109.16	3	K(1)EVDSKPVSQKPPPPSEK	1.2795	3	1.72795		0.378167			0.893886	1.00546	0.997336	1.04948	0.968254	0.975588	1.00388	1.719		0.36			0.89	0.856
O95983	41	K	Methyl-CpG-binding domain protein 3 OS=Homo sapiens OX=9606 GN=MBD3 PE=1 SV=1	MBD3	1	0.000214356	90.263	2	DVFYYSPSGK(1)K	1.7458	5	1.18148	1.0314	0.874411		1.06705	0.845668	0.915414	1.07176	0.97718	0.887399	1.08848	1.05976	1.291	0.962	0.895		0.98	0.798	0.847	0.405091
Q9UBB5	253	K	Methyl-CpG-binding domain protein 2 OS=Homo sapiens OX=9606 GN=MBD2 PE=1 SV=1	MBD2	1	0.00539735	51.531	2	QTASIFK(1)QPVTK	-0.69434	2			0.969698	1.0303			1.14637	0.95108	0.816531	1.10942	1.02628	0.950315			1.188	0.929			0.782
Q9UBB5	190	K	Methyl-CpG-binding domain protein 2 OS=Homo sapiens OX=9606 GN=MBD2 PE=1 SV=1	MBD2	1	0.0591959	53.679	2	SK(1)PQLAR	0.45023	2	1.01933			0.980665			1.14637	0.95108	0.816531	1.10942	1.02628	0.950315	0.889			0.884			0.994
O96028	404	K	Histone-lysine N-methyltransferase NSD2 OS=Homo sapiens OX=9606 GN=NSD2 PE=1 SV=1	NSD2	1	0.000303824	49.487	3	AK(1)LCSSAETLESHPDIGK	-0.16736	3		1.00718			0.879164	1.11366	0.609677	1.23657	0.951516		1.049	1.15324		0.814			0.838	0.966	1.108
P00338	232	K	L-lactate dehydrogenase A chain OS=Homo sapiens OX=9606 GN=LDHA PE=1 SV=2	LDHA	1	9.92916e-23	162.52	2	EVHK(1)QVVESAYEVIK	0.39466	7	1.57181	1.10052	0.838262	1.29591	0.677675	0.515828	0.851892	1.02483	1.02023	0.917846	1.08609	1.09911	1.845	1.074	0.822	1.412	0.624	0.469	0.67	0.32411
P00338	81	K	L-lactate dehydrogenase A chain OS=Homo sapiens OX=9606 GN=LDHA PE=1 SV=2	LDHA	1	2.25059e-05	112.95	2	IVSGK(1)DYNVTANSK	-0.35416	5		1.03823	0.819698	1.07734	0.999202	1.06553	0.851892	1.02483	1.02023	0.917846	1.08609	1.09911		1.013	0.803	1.174	0.92	0.969	1.124	0.426531
P00338	318	K	L-lactate dehydrogenase A chain OS=Homo sapiens OX=9606 GN=LDHA PE=1 SV=2	LDHA	1	2.56266e-07	179.95	2	K(1)SADTLWGIQK	-0.44306	7	1.18158	1.06602	0.776188	1.12338	0.913811	0.939028	0.851892	1.02483	1.02023	0.917846	1.08609	1.09911	1.387	1.04	0.761	1.224	0.841	0.854	0.916	0.744895
P00338	222	K	L-lactate dehydrogenase A chain OS=Homo sapiens OX=9606 GN=LDHA PE=1 SV=2	LDHA	1	2.01005e-08	126.17	2	TLHPDLGTDK(1)DK	3.1777	6	1.27436	0.875	0.648408	1.32961	0.872624		0.851892	1.02483	1.02023	0.917846	1.08609	1.09911	1.496	0.854	0.636	1.449	0.803		1.131	0.735834
P00338	228	K	L-lactate dehydrogenase A chain OS=Homo sapiens OX=9606 GN=LDHA PE=1 SV=2	LDHA	0.996593	4.77715e-07	77.325	3	TLHPDLGTDK(0.001)DK(0.002)EQWK(0.997)EVHK	0.57679	2		0.700561		1.29944			0.851892	1.02483	1.02023	0.917846	1.08609	1.09911		0.684		1.416			2.07
P00387	164	K	NADH-cytochrome b5 reductase 3 OS=Homo sapiens OX=9606 GN=CYB5R3 PE=1 SV=3	CYB5R3	1	0.00412152	100.67	2	K(1)SNPIIR	-0.28738	6	1.29998	0.856791	0.541204	1.54611	0.960701	0.795217	1.14782	0.949378	0.968911	1.01819	0.964546	0.951154	1.133	0.902	0.559	1.518	0.996	0.836	1.291	0.387546
P00558	216	K	Phosphoglycerate kinase 1 OS=Homo sapiens OX=9606 GN=PGK1 PE=1 SV=3	PGK1	1	2.44959e-09	76.23	3	ALESPERPFLAILGGAK(1)VADK	0.9134	9	1.21132	1.70976	0.353131	2.10151	0.246596	0.377687	0.835611	0.963985	0.917651	1.01763	1.10443	1.1607	1.45	1.774	0.385	2.065	0.223	0.325	0.724	0.494184
P00558	220	K	Phosphoglycerate kinase 1 OS=Homo sapiens OX=9606 GN=PGK1 PE=1 SV=3	PGK1	1	0.00106667	62.454	2	VADK(1)IQLINNMLDK	-5.9259	3		1.26219		1.20172	0.536088		0.835611	0.963985	0.917651	1.01763	1.10443	1.1607		1.309		1.181	0.485		0.636
P00558	361	K	Phosphoglycerate kinase 1 OS=Homo sapiens OX=9606 GN=PGK1 PE=1 SV=3	PGK1	1	0.00300298	75.474	2	ALMDEVVK(1)ATSR	0.0061798	6	1.5104	1.20061	0.419982	1.43527	0.71004	0.723689	0.835611	0.963985	0.917651	1.01763	1.10443	1.1607	1.808	1.245	0.458	1.41	0.643	0.623	0.762	0.702875
P00558	131	K	Phosphoglycerate kinase 1 OS=Homo sapiens OX=9606 GN=PGK1 PE=1 SV=3	PGK1	1	0.000163809	112.8	2	FHVEEEGK(1)GK	-0.85866	5		1.20693	0.590085	1.62431	0.883737	0.694947	0.835611	0.963985	0.917651	1.01763	1.10443	1.1607		1.252	0.643	1.596	0.8	0.599	1.054	0.968885
P00558	192	K	Phosphoglycerate kinase 1 OS=Homo sapiens OX=9606 GN=PGK1 PE=1 SV=3	PGK1	1	0.00912088	74.486	2	K(1)ELNYFAK	4.7505	1				1			0.835611	0.963985	0.917651	1.01763	1.10443	1.1607				0.983
P00558	323	K	Phosphoglycerate kinase 1 OS=Homo sapiens OX=9606 GN=PGK1 PE=1 SV=3	PGK1	1	0.0112405	79.809	2	K(1)YAEAVTR	-4.1502	3		1.07994			1.00772	0.912331	0.835611	0.963985	0.917651	1.01763	1.10443	1.1607		1.12			0.912	0.786	0.758
P00558	91	K	Phosphoglycerate kinase 1 OS=Homo sapiens OX=9606 GN=PGK1 PE=1 SV=3	PGK1	1	0.0486007	47.561	2	SLLGK(1)DVLFLK	-0.39603	1				1			0.835611	0.963985	0.917651	1.01763	1.10443	1.1607				0.983
P02545	260	K	Prelamin-A/C OS=Homo sapiens OX=9606 GN=LMNA PE=1 SV=1	LMNA	1	9.19793e-05	97.175	2	AQHEDQVEQYK(1)K	-0.24313	1		1					0.939312	1.0243	0.960964	1.11095	0.988781	0.975693		0.976
P02545	155	K	Prelamin-A/C OS=Homo sapiens OX=9606 GN=LMNA PE=1 SV=1	LMNA	1	0.0028606	64.906	2	EAALSTALSEK(1)R	1.1463	4		1.24666		0.928322	0.848212	0.97681	0.939312	1.0243	0.960964	1.11095	0.988781	0.975693		1.217		0.836	0.858	1.001	0.738
P02545	171	K	Prelamin-A/C OS=Homo sapiens OX=9606 GN=LMNA PE=1 SV=1	LMNA	1	0.00049439	86.838	2	GQVAK(1)LEAALGEAK	-2.1131	5	1.54732	1.24183	0.478487	0.993054	0.739308		0.939312	1.0243	0.960964	1.11095	0.988781	0.975693	1.647	1.212	0.498	0.894	0.748		0.734	0.698909
P02545	180	K	Prelamin-A/C OS=Homo sapiens OX=9606 GN=LMNA PE=1 SV=1	LMNA	1	0.000310111	95.311	2	LEAALGEAK(1)K	1.222	5		1.24682	0.808074	0.943871	1.06242	0.938821	0.939312	1.0243	0.960964	1.11095	0.988781	0.975693		1.217	0.841	0.85	1.074	0.962	0.935	0.758464
P02545	378	K	Prelamin-A/C OS=Homo sapiens OX=9606 GN=LMNA PE=1 SV=1	LMNA	1	0.00151232	79.059	2	K(1)LLEGEEER	0.85216	4	1.13166	0.934809		1.31625	0.617278		0.939312	1.0243	0.960964	1.11095	0.988781	0.975693	1.205	0.913		1.185	0.624		0.854	0.626978
P02545	135	K	Prelamin-A/C OS=Homo sapiens OX=9606 GN=LMNA PE=1 SV=1	LMNA	1	0.000189277	122.51	2	LK(1)DLEALLNSK	1.2291	4	1.20881			0.959827	0.92211	0.909257	0.939312	1.0243	0.960964	1.11095	0.988781	0.975693	1.287			0.864	0.933	0.932	0.707
P02545	97	K	Prelamin-A/C OS=Homo sapiens OX=9606 GN=LMNA PE=1 SV=1	LMNA	1	0.000332096	67.507	2	TLDSVAK(1)ER	0.28573	3	1.17685	0.797594		1.02556			0.939312	1.0243	0.960964	1.11095	0.988781	0.975693	1.253	0.779		0.923			0.908
P02545	270	K	Prelamin-A/C OS=Homo sapiens OX=9606 GN=LMNA PE=1 SV=1	LMNA	1	0.000219715	102.55	2	TYSAK(1)LDNAR	1.3803	4		1.25557	0.830149	0.989572	0.924704		0.939312	1.0243	0.960964	1.11095	0.988781	0.975693		1.226	0.864	0.891	0.935		0.874	0.566676
P02545	114	K	Prelamin-A/C OS=Homo sapiens OX=9606 GN=LMNA PE=1 SV=1	LMNA	1	0.07869	50.297	2	VREEFK(1)ELK	0.10738	1					1		0.939312	1.0243	0.960964	1.11095	0.988781	0.975693					1.011
P04075	330	K	Fructose-bisphosphate aldolase A OS=Homo sapiens OX=9606 GN=ALDOA PE=1 SV=2	ALDOA	1	0.000315678	79.059	2	AAQEEYVK(1)R	-0.81173	6	1.19608	1.25454	1.02397	0.734521	0.934637	0.856252	0.88933	0.991961	1.03017	0.950277	1.02354	1.11472	1.345	1.265	0.994	0.773	0.913	0.768	0.681	0.0248208
P04075	312	K	Fructose-bisphosphate aldolase A OS=Homo sapiens OX=9606 GN=ALDOA PE=1 SV=2	ALDOA	1	8.24984e-05	96.957	2	ALQASALK(1)AWGGK	-0.16783	6	1.60071	1.2066	0.663069	1.14892	0.776769	0.603932	0.88933	0.991961	1.03017	0.950277	1.02354	1.11472	1.8	1.216	0.644	1.209	0.759	0.542	0.686	0.411601
P04075	230	K	Fructose-bisphosphate aldolase A OS=Homo sapiens OX=9606 GN=ALDOA PE=1 SV=2	ALDOA	1	3.2762e-45	200.17	4	ALSDHHIYLEGTLLK(1)PNMVTPGHACTQK	1.8171	16	0.924343	1.12335	0.845583	1.29841	0.896322	0.911992	0.88933	0.991961	1.03017	0.950277	1.02354	1.11472	1.039	1.132	0.821	1.366	0.876	0.818	1.023	0.981853
P04075	147	K	Fructose-bisphosphate aldolase A OS=Homo sapiens OX=9606 GN=ALDOA PE=1 SV=2	ALDOA	1	3.15038e-15	236.03	2	KDGADFAK(1)WR	2.1882	19	0.924179	1.22944	0.983128	0.955526	0.947614	0.960111	0.88933	0.991961	1.03017	0.950277	1.02354	1.11472	1.039	1.239	0.954	1.006	0.926	0.861	0.864	0.186312
P04075	322	K	Fructose-bisphosphate aldolase A OS=Homo sapiens OX=9606 GN=ALDOA PE=1 SV=2	ALDOA	1	5.60393e-06	138.71	2	ENLK(1)AAQEEYVK	-0.57902	6	1.225	1.02287	0.836682	1.08509	0.920824	0.909539	0.88933	0.991961	1.03017	0.950277	1.02354	1.11472	1.377	1.031	0.812	1.142	0.9	0.816	0.888	0.592248
P04075	108	K	Fructose-bisphosphate aldolase A OS=Homo sapiens OX=9606 GN=ALDOA PE=1 SV=2	ALDOA	1	0.00146307	108.3	2	GGVVGIK(1)VDK	-0.28657	5	1.06114		0.895747	1.16066	0.905096	0.977353	0.88933	0.991961	1.03017	0.950277	1.02354	1.11472	1.193		0.87	1.221	0.884	0.877	0.964	0.853454
P04075	42	K	Fructose-bisphosphate aldolase A OS=Homo sapiens OX=9606 GN=ALDOA PE=1 SV=2	ALDOA	1	7.76318e-39	257.01	2	GILAADESTGSIAK(1)R	0.52139	6	1.03788	0.926564	0.793536	1.59382	0.851938	0.796265	0.88933	0.991961	1.03017	0.950277	1.02354	1.11472	1.167	0.934	0.77	1.677	0.832	0.714	1.123	0.852919
P04075	28	K	Fructose-bisphosphate aldolase A OS=Homo sapiens OX=9606 GN=ALDOA PE=1 SV=2	ALDOA	1	0.0678529	42.495	3	IVAPGK(1)GILAADESTGSIAK	0.43128	1						1	0.88933	0.991961	1.03017	0.950277	1.02354	1.11472						0.897
P04075	14	K	Fructose-bisphosphate aldolase A OS=Homo sapiens OX=9606 GN=ALDOA PE=1 SV=2	ALDOA	1	0.000330452	115.86	2	K(1)ELSDIAHR	0.48078	6	1.17663	0.876266	0.679866	1.71755	0.911244	0.638441	0.88933	0.991961	1.03017	0.950277	1.02354	1.11472	1.323	0.883	0.66	1.807	0.89	0.573	1.141	0.886426
P04075	13	K	Fructose-bisphosphate aldolase A OS=Homo sapiens OX=9606 GN=ALDOA PE=1 SV=2	ALDOA	1	1.8465e-18	188.6	2	PYQYPALTPEQK(1)K	-0.42799	6	1.40098	0.784852	0.627171	1.7836	0.705535	0.697857	0.88933	0.991961	1.03017	0.950277	1.02354	1.11472	1.575	0.791	0.609	1.877	0.689	0.626	1.073	0.964063
P04075	101	K	Fructose-bisphosphate aldolase A OS=Homo sapiens OX=9606 GN=ALDOA PE=1 SV=2	ALDOA	1	0.0128742	76.605	2	SK(1)GGVVGIK	0.27824	3		1.19268			0.873926	0.933391	0.88933	0.991961	1.03017	0.950277	1.02354	1.11472		1.202			0.854	0.837	0.703
P04080	91	K	Cystatin-B OS=Homo sapiens OX=9606 GN=CSTB PE=1 SV=2	CSTB	1	0.0389972	51.864	2	AK(1)HDELTYF	-0.63564	2					1.16415	0.835846	0.958445	1.07458	0.997769	0.872657	1.08015	1.0164					1.078	0.822
P04080	39	K	Cystatin-B OS=Homo sapiens OX=9606 GN=CSTB PE=1 SV=2	CSTB	0.999434	0.00463535	57.293	2	K(0.001)FPVFK(0.999)AVSFK	0.20105	3	1.21743		0.613996	1.16857			0.958445	1.07458	0.997769	0.872657	1.08015	1.0164	1.27		0.615	1.339			1.421
P04083	90	K	Annexin A1 OS=Homo sapiens OX=9606 GN=ANXA1 PE=1 SV=2	ANXA1	1	5.86092e-12	126.17	2	AAYLQETGK(1)PLDETLK	0.25561	6	1.24246	1.03696	0.613616	1.61778	0.917693	0.571491	1.02888	0.956977	0.953962	1.15836	0.982489	0.919333	1.208	1.084	0.643	1.397	0.934	0.622	1.006	0.96977
P04083	97	K	Annexin A1 OS=Homo sapiens OX=9606 GN=ANXA1 PE=1 SV=2	ANXA1	0.999201	0.00045963	58.508	2	AAYLQETGK(0.001)PLDETLK(0.999)K	-2.5283	2	1.59963				0.400371		1.02888	0.956977	0.953962	1.15836	0.982489	0.919333	1.555				0.408		0.262
P04083	98	K	Annexin A1 OS=Homo sapiens OX=9606 GN=ANXA1 PE=1 SV=2	ANXA1	1	8.14241e-09	94.63	3	K(1)ALTGHLEEVVLALLK	-0.09778	1				1			1.02888	0.956977	0.953962	1.15836	0.982489	0.919333				0.863
P04083	166	K	Annexin A1 OS=Homo sapiens OX=9606 GN=ANXA1 PE=1 SV=2	ANXA1	1	1.12547e-12	121.69	2	DLAK(1)DITSDTSGDFR	0.59576	6	1.62172	1.04427	0.317227	2.01506	0.658746	0.342967	1.02888	0.956977	0.953962	1.15836	0.982489	0.919333	1.576	1.091	0.333	1.74	0.67	0.373	0.928	0.89448
P04083	250	K	Annexin A1 OS=Homo sapiens OX=9606 GN=ANXA1 PE=1 SV=2	ANXA1	1	0.000497691	99.589	2	HDMNK(1)VLDLELK	-1.8478	5	1.10905	1.2088		1.38606	0.77279	0.523297	1.02888	0.956977	0.953962	1.15836	0.982489	0.919333	1.078	1.263		1.197	0.787	0.569	0.727	0.292179
P04083	257	K	Annexin A1 OS=Homo sapiens OX=9606 GN=ANXA1 PE=1 SV=2	ANXA1	1	0.000264856	88.24	2	VLDLELK(1)GDIEK	-0.45545	1				1			1.02888	0.956977	0.953962	1.15836	0.982489	0.919333				0.863
P04083	214	K	Annexin A1 OS=Homo sapiens OX=9606 GN=ANXA1 PE=1 SV=2	ANXA1	1	4.23279e-11	153.18	2	K(1)GTDVNVFNTILTTR	2.8916	4		1.15165	0.490141	1.55207	0.806137		1.02888	0.956977	0.953962	1.15836	0.982489	0.919333		1.203	0.514	1.34	0.821		1.259	0.616593
P04083	287	K	Annexin A1 OS=Homo sapiens OX=9606 GN=ANXA1 PE=1 SV=2	ANXA1	1	0.000187155	90.263	2	LHQAMK(1)GVGTR	0.29986	3	0.917768			1.52384	0.558391		1.02888	0.956977	0.953962	1.15836	0.982489	0.919333	0.892			1.316	0.568		1.056
P04083	185	K	Annexin A1 OS=Homo sapiens OX=9606 GN=ANXA1 PE=1 SV=2	ANXA1	1	0.000105376	132.39	2	NALLSLAK(1)GDR	-0.25466	6	1.39002	1.45474	0.849397	1.48892	0.125671	0.691259	1.02888	0.956977	0.953962	1.15836	0.982489	0.919333	1.351	1.52	0.89	1.285	0.128	0.752	0.576	0.277974
P04083	281	K	Annexin A1 OS=Homo sapiens OX=9606 GN=ANXA1 PE=1 SV=2	ANXA1	1	0.00338856	60.547	3	PAFFAEK(1)LHQAMK	1.1236	3	1.44747	1.1299	0.422631				1.02888	0.956977	0.953962	1.15836	0.982489	0.919333	1.407	1.181	0.443
P04083	312	K	Annexin A1 OS=Homo sapiens OX=9606 GN=ANXA1 PE=1 SV=2	ANXA1	1	2.45493e-29	228.28	2	SEIDMNDIK(1)AFYQK	-1.6008	6	1.65159	1.47313	0.760712	1.28018	0.590302	0.244082	1.02888	0.956977	0.953962	1.15836	0.982489	0.919333	1.605	1.539	0.797	1.105	0.601	0.265	0.5	0.163133
P04083	29	K	Annexin A1 OS=Homo sapiens OX=9606 GN=ANXA1 PE=1 SV=2	ANXA1	1	2.13669e-81	251.21	3	SSK(1)GGPGSAVSPYPTFNPSSDVAALHK	0.37646	6	1.23802	1.15459	0.566535	1.45558	0.982334	0.602949	1.02888	0.956977	0.953962	1.15836	0.982489	0.919333	1.203	1.206	0.594	1.257	1	0.656	0.97	0.963616
P04406	215	K	Glyceraldehyde-3-phosphate dehydrogenase OS=Homo sapiens OX=9606 GN=GAPDH PE=1 SV=3	GAPDH	1	8.60056e-12	104.86	2	GALQNIIPASTGAAK(1)AVGK	0.14282	12	1.34498	0.965914	0.61312	1.79259	0.708056	0.575339	0.991583	0.951068	1.04818	1.02758	0.92533	1.05627	1.356	1.016	0.585	1.744	0.765	0.545	1.033	0.939443
P04406	263	K	Glyceraldehyde-3-phosphate dehydrogenase OS=Homo sapiens OX=9606 GN=GAPDH PE=1 SV=3	GAPDH	1	0.000888626	88.24	2	VVK(1)QASEGPLK	-1.0892	9	1.43024	1.14288	0.857799	0.965499	0.771241	0.832342	0.991583	0.951068	1.04818	1.02758	0.92533	1.05627	1.442	1.202	0.818	0.94	0.833	0.788	0.74	0.188278
P04406	254	K	Glyceraldehyde-3-phosphate dehydrogenase OS=Homo sapiens OX=9606 GN=GAPDH PE=1 SV=3	GAPDH	1	0.00160697	112.93	2	PAK(1)YDDIK	0.45067	12	1.32854	1.1586	0.870153	0.912026	0.764347	0.966335	0.991583	0.951068	1.04818	1.02758	0.92533	1.05627	1.34	1.218	0.83	0.888	0.826	0.915	0.776	0.192402
P04406	194	K	Glyceraldehyde-3-phosphate dehydrogenase OS=Homo sapiens OX=9606 GN=GAPDH PE=1 SV=3	GAPDH	1	8.76218e-05	158.57	2	TVDGPSGK(1)LWR	-0.066902	6	1.27491	0.941723	0.759942	1.45737	0.796486	0.769574	0.991583	0.951068	1.04818	1.02758	0.92533	1.05627	1.286	0.99	0.725	1.418	0.861	0.729	1.002	0.964967
P04637	120	K	Cellular tumor antigen p53 OS=Homo sapiens OX=9606 GN=TP53 PE=1 SV=4	TP53	1	1.26124e-06	91.457	3	LGFLHSGTAK(1)SVTCTYSPALNK	0.54562	3		1.11694	0.913788			0.969269	0.855735	0.986664	1.08994	0.861655	1.08547	1.12053		1.132	0.838			0.865	0.878
P04792	198	K	Heat shock protein beta-1 OS=Homo sapiens OX=9606 GN=HSPB1 PE=1 SV=2	HSPB1	1	1.85343e-28	199.84	2	AQLGGPEAAK(1)SDETAAK	0.97297	6	1.07744	1.19951	0.794998	0.959585	1.02962	0.938851	0.836576	1.00938	1.03977	0.945162	1.08895	1.08015	1.288	1.188	0.765	1.015	0.946	0.869	0.873	0.538567
P04792	123	K	Heat shock protein beta-1 OS=Homo sapiens OX=9606 GN=HSPB1 PE=1 SV=2	HSPB1	1	9.6104e-07	110.52	2	DGVVEITGK(1)HEER	-0.001946	6	1.14144	1.36704	0.941527	0.691477	0.844243	1.01428	0.836576	1.00938	1.03977	0.945162	1.08895	1.08015	1.364	1.354	0.906	0.732	0.775	0.939	0.675	0.0692733
P04792	114	K	Heat shock protein beta-1 OS=Homo sapiens OX=9606 GN=HSPB1 PE=1 SV=2	HSPB1	1	0.000496259	97.175	2	TK(1)DGVVEITGK	-0.17985	6	1.19862	1.0959	0.777535	0.840001	1.00381	1.08413	0.836576	1.00938	1.03977	0.945162	1.08895	1.08015	1.433	1.086	0.748	0.889	0.922	1.004	0.862	0.579146
P04792	112	K	Heat shock protein beta-1 OS=Homo sapiens OX=9606 GN=HSPB1 PE=1 SV=2	HSPB1	1	7.87989e-08	77.347	3	VSLDVNHFAPDELTVK(1)TK	0.22338	3		1.05182		1.55233		0.395853	0.836576	1.00938	1.03977	0.945162	1.08895	1.08015		1.042		1.642		0.366	0.964
P04843	579	K	Dolichyl-diphosphooligosaccharide--protein glycosyltransferase subunit 1 OS=Homo sapiens OX=9606 GN=RPN1 PE=1 SV=1	RPN1	1	0.00488178	83.623	2	K(1)DTYIENEK	0.81312	2	1.02159			0.978412			1.04751	0.972738	0.972873	1.03954	0.984277	0.983062	0.975			0.941			0.965
P04843	538	K	Dolichyl-diphosphooligosaccharide--protein glycosyltransferase subunit 1 OS=Homo sapiens OX=9606 GN=RPN1 PE=1 SV=1	RPN1	1	0.000365298	76.85	2	LK(1)TEGSDLCDR	2.2448	2		1.36163				0.638374	1.04751	0.972738	0.972873	1.03954	0.984277	0.983062		1.4				0.649	0.464
P05141	105	K	ADP/ATP translocase 2 OS=Homo sapiens OX=9606 GN=SLC25A5 PE=1 SV=7	SLC25A5	1	0.00378234	74.269	2	QIFLGGVDK(1)R	0.46202	3	1.31507	0.695436		0.989494			1.0485	0.88041	1.12819	0.974878	0.867615	1.10041	1.254	0.79		1.015			0.993
P05141	33	K	ADP/ATP translocase 2 OS=Homo sapiens OX=9606 GN=SLC25A5 PE=1 SV=7	SLC25A5	1	1.12382e-05	123.42	2	VK(1)LLLQVQHASK	-0.084439	6	1.71331	1.2407	0.589464	0.9434	0.716425	0.796708	1.0485	0.88041	1.12819	0.974878	0.867615	1.10041	1.634	1.409	0.522	0.968	0.826	0.724	0.706	0.54431
P05141	92	K	ADP/ATP translocase 2 OS=Homo sapiens OX=9606 GN=SLC25A5 PE=1 SV=7	SLC25A5	1	2.40519e-05	73.891	2	YFPTQALNFAFK(1)DK	0.65698	1				1			1.0485	0.88041	1.12819	0.974878	0.867615	1.10041				1.026
P05141	96	K	ADP/ATP translocase 2 OS=Homo sapiens OX=9606 GN=SLC25A5 PE=1 SV=7	SLC25A5	1	0.000664648	90.142	2	YK(1)QIFLGGVDK	-0.35257	2				1.49599		0.504015	1.0485	0.88041	1.12819	0.974878	0.867615	1.10041				1.535		0.458
P05198	61	K	Eukaryotic translation initiation factor 2 subunit 1 OS=Homo sapiens OX=9606 GN=EIF2S1 PE=1 SV=3	EIF2S1	1	0.0101889	80.294	2	SINK(1)LIR	-0.16255	5		1.22495	0.897951	0.980706	0.94486	0.951529	1.02978	1.01198	1.01198	1.01023	0.980797	0.95522		1.21	0.887	0.971	0.963	0.996	0.931	0.646967
P05387	25	K	60S acidic ribosomal protein P2 OS=Homo sapiens OX=9606 GN=RPLP2 PE=1 SV=1	RPLP2	1	0.00277598	49.097	2	K(1)ILDSVGIEADDDR	0.7095	3		1.0757	0.58097	1.34333			1.1378	0.943884	1.0074	1.07221	0.900618	0.938087		1.14	0.577	1.253			1.46
P05455	354	K	Lupus La protein OS=Homo sapiens OX=9606 GN=SSB PE=1 SV=2	SSB	1	7.70905e-05	134.85	2	GK(1)VQFQGK	-0.20817	5	1.06459	0.985512	0.862045	1.25097		0.836884	1.05715	0.979088	0.953852	1.13923	0.944418	0.926258	1.007	1.007	0.904	1.098		0.904	1.029	0.788142
P05455	360	K	Lupus La protein OS=Homo sapiens OX=9606 GN=SSB PE=1 SV=2	SSB	1	0.0251252	64.547	2	VQFQGK(1)K	-1.877	4	0.990861			1.34403	0.899372	0.765742	1.05715	0.979088	0.953852	1.13923	0.944418	0.926258	0.937			1.18	0.952	0.827	1.053
P05455	328	K	Lupus La protein OS=Homo sapiens OX=9606 GN=SSB PE=1 SV=2	SSB	1	7.12558e-45	274.62	2	IIEDQQESLNK(1)WK	-0.22163	6	1.27295	1.01254	0.777772	1.44019	0.816248	0.680297	1.05715	0.979088	0.953852	1.13923	0.944418	0.926258	1.204	1.034	0.815	1.264	0.864	0.734	0.937	0.710499
P05556	794	K	Integrin beta-1 OS=Homo sapiens OX=9606 GN=ITGB1 PE=1 SV=2	ITGB1	1	0.00029882	90.306	2	SAVTTVVNPK(1)YEGK	-1.6004	1				1			1.14678	0.826472	0.948237	1.06853	0.927302	1.08268				0.936
P05783	417	K	Keratin, type I cytoskeletal 18 OS=Homo sapiens OX=9606 GN=KRT18 PE=1 SV=2	KRT18	1	7.12805e-39	252.75	2	IVDGK(1)VVSETNDTK	0.21791	11	0.999276	1.126	0.739909	1.13351	1.15122	0.850086	1.16042	0.968519	1.00269	1.04353	0.923803	0.901028	0.861	1.163	0.738	1.086	1.246	0.943	1.186	0.307711
P05783	426	K	Keratin, type I cytoskeletal 18 OS=Homo sapiens OX=9606 GN=KRT18 PE=1 SV=2	KRT18	1	1.06359e-07	171.34	2	VVSETNDTK(1)VLR	-0.75454	6	0.954641	1.08493	0.813698	1.05573	1.17579	0.915212	1.16042	0.968519	1.00269	1.04353	0.923803	0.901028	0.823	1.12	0.812	1.012	1.273	1.016	1.198	0.223771
P05783	187	K	Keratin, type I cytoskeletal 18 OS=Homo sapiens OX=9606 GN=KRT18 PE=1 SV=2	KRT18	1	0.000181239	96.957	2	K(1)VIDDTNITR	-1.0726	5	1.37383	0.891227		1.39317	0.727528	0.614246	1.16042	0.968519	1.00269	1.04353	0.923803	0.901028	1.184	0.92		1.335	0.788	0.682	0.889	0.621567
P05783	317	K	Keratin, type I cytoskeletal 18 OS=Homo sapiens OX=9606 GN=KRT18 PE=1 SV=2	KRT18	1	0.000228199	74.849	2	NLK(1)ASLENSLR	-0.17486	6	1.7181	1.32509	0.592333	0.972057	0.811018	0.581399	1.16042	0.968519	1.00269	1.04353	0.923803	0.901028	1.481	1.368	0.591	0.932	0.878	0.645	0.714	0.435257
P06400	900	K	Retinoblastoma-associated protein OS=Homo sapiens OX=9606 GN=RB1 PE=1 SV=2	RB1	1	9.87012e-06	101.48	2	FQQK(1)LAEMTSTR	-2.0178	4		1.01823	0.966278	1.19025		0.825248
P06400	873	K	Retinoblastoma-associated protein OS=Homo sapiens OX=9606 GN=RB1 PE=1 SV=2	RB1	0.999826	3.53366e-06	136.94	2	SAEGSNPPKPLK(1)K	0.20205	5	1.07446	0.634043	1.38944	0.97269		0.929361
P06454	15	K	Prothymosin alpha OS=Homo sapiens OX=9606 GN=PTMA PE=1 SV=2	PTMA	1	5.01865e-07	98.167	2	SDAAVDTSSEITTK(1)DLK	-0.34382	1				1			0.965013	1.52929	1.40665	0.211389	1.02912	0.85854				4.731
P06703	40	K	Protein S100-A6 OS=Homo sapiens OX=9606 GN=S100A6 PE=1 SV=1	S100A6	1	4.15248e-11	165.39	2	ELIQK(1)ELTIGSK	-0.17492	6	1.11129	1.34316	0.66607	1.0541	0.894569	0.930808	0.962976	1.08346	0.938203	0.916636	1.10126	0.997464	1.154	1.24	0.71	1.15	0.812	0.933	0.933	0.812495
P06703	47	K	Protein S100-A6 OS=Homo sapiens OX=9606 GN=S100A6 PE=1 SV=1	S100A6	1	4.79978e-62	228.73	2	ELTIGSK(1)LQDAEIAR	-1.2025	10	0.870599	1.30279	0.705938	1.14416	1.1214	0.855116	0.962976	1.08346	0.938203	0.916636	1.10126	0.997464	0.904	1.202	0.752	1.248	1.018	0.857	1.093	0.612455
P06703	35	K	Protein S100-A6 OS=Homo sapiens OX=9606 GN=S100A6 PE=1 SV=1	S100A6	1	0.00094973	102.46	2	ELK(1)ELIQK	-0.69273	1					1		0.962976	1.08346	0.938203	0.916636	1.10126	0.997464					0.908
P06729	88	K	T-cell surface antigen CD2 OS=Homo sapiens OX=9606 GN=CD2 PE=1 SV=2	CD2	0.995683	0.0255338	41.025	2	LFK(0.996)NGTLK(0.004)IK	-0.70181	1						1
P06730	206	K	Eukaryotic translation initiation factor 4E OS=Homo sapiens OX=9606 GN=EIF4E PE=1 SV=2	EIF4E	1	0.000135687	57.62	3	IVIGYQSHADTATK(1)SGSTTK	-0.72212	1				1			0.933559	0.975547	1.08852	1.05646	0.948215	0.997698				0.947
P06733	126	K	Alpha-enolase OS=Homo sapiens OX=9606 GN=ENO1 PE=1 SV=2	ENO1	1	0.00047784	68.49	2	AGAVEK(1)GVPLYR	-0.31436	2		1.25345	0.746551				0.927067	0.999921	1.01355	1.01412	0.999733	1.04561		1.254	0.737
P06733	71	K	Alpha-enolase OS=Homo sapiens OX=9606 GN=ENO1 PE=1 SV=2	ENO1	1	2.91393e-22	164.56	2	AVEHINK(1)TIAPALVSK	0.12784	12	1.24091	1.10502	0.705737	1.3602	0.852872	0.735261	0.927067	0.999921	1.01355	1.01412	0.999733	1.04561	1.339	1.105	0.696	1.341	0.853	0.703	0.923	0.777408
P06733	80	K	Alpha-enolase OS=Homo sapiens OX=9606 GN=ENO1 PE=1 SV=2	ENO1	1	0.00323065	83.358	2	TIAPALVSK(1)K	0.43188	4			0.788006	1.43727	0.901391	0.873329	0.927067	0.999921	1.01355	1.01412	0.999733	1.04561			0.777	1.417	0.902	0.835	1.353
P06733	335	K	Alpha-enolase OS=Homo sapiens OX=9606 GN=ENO1 PE=1 SV=2	ENO1	1	5.30284e-05	95.656	2	AVNEK(1)SCNCLLLK	1.5762	3	1.60994	1.03579	0.354262				0.927067	0.999921	1.01355	1.01412	0.999733	1.04561	1.737	1.036	0.35
P06733	64	K	Alpha-enolase OS=Homo sapiens OX=9606 GN=ENO1 PE=1 SV=2	ENO1	1	7.3591e-05	150.21	2	GVSK(1)AVEHINK	-0.6608	6	1.2628	1.09605	0.80328	1.10186	0.901658	0.834347	0.927067	0.999921	1.01355	1.01412	0.999733	1.04561	1.362	1.096	0.793	1.087	0.902	0.798	0.857	0.488273
P06733	420	K	Alpha-enolase OS=Homo sapiens OX=9606 GN=ENO1 PE=1 SV=2	ENO1	1	0.000193246	107.08	2	IEEELGSK(1)AK	-0.27406	6	1.30346	1.04226	0.776904	1.1955	0.830366	0.851509	0.927067	0.999921	1.01355	1.01412	0.999733	1.04561	1.406	1.042	0.767	1.179	0.831	0.814	0.878	0.618821
P06733	193	K	Alpha-enolase OS=Homo sapiens OX=9606 GN=ENO1 PE=1 SV=2	ENO1	1	1.06057e-07	145.95	2	IGAEVYHNLK(1)NVIK	-0.971	6	1.63386	1.18554	0.437571	1.80758	0.591425	0.344027	0.927067	0.999921	1.01355	1.01412	0.999733	1.04561	1.762	1.186	0.432	1.782	0.592	0.329	0.8	0.648849
P06733	81	K	Alpha-enolase OS=Homo sapiens OX=9606 GN=ENO1 PE=1 SV=2	ENO1	1	8.26604e-07	192.6	2	K(1)LNVTEQEK	-0.99301	6	1.01428	1.08847	0.819461	1.27129	0.934201	0.872301	0.927067	0.999921	1.01355	1.01412	0.999733	1.04561	1.094	1.089	0.809	1.254	0.934	0.834	1.01	0.978718
P06733	89	K	Alpha-enolase OS=Homo sapiens OX=9606 GN=ENO1 PE=1 SV=2	ENO1	1	3.94788e-07	145.08	2	LNVTEQEK(1)IDK	-2.4594	10	1.60974	0.962828	0.740309	1.25071	0.668224	0.768188	0.927067	0.999921	1.01355	1.01412	0.999733	1.04561	1.736	0.963	0.73	1.233	0.668	0.735	0.769	0.503907
P06733	406	K	Alpha-enolase OS=Homo sapiens OX=9606 GN=ENO1 PE=1 SV=2	ENO1	1	0.000605331	101.41	2	LAK(1)YNQLLR	-1.4499	6	1.21506	1.15183	1.00098	0.901944	0.87623	0.853949	0.927067	0.999921	1.01355	1.01412	0.999733	1.04561	1.311	1.152	0.988	0.889	0.876	0.817	0.748	0.0296178
P06733	256	K	Alpha-enolase OS=Homo sapiens OX=9606 GN=ENO1 PE=1 SV=2	ENO1	1	0.0122592	76.572	2	SGK(1)YDLDFK	2.0465	3		1.19962		1.09405		0.70633	0.927067	0.999921	1.01355	1.01412	0.999733	1.04561		1.2		1.079		0.676	0.731
P06733	262	K	Alpha-enolase OS=Homo sapiens OX=9606 GN=ENO1 PE=1 SV=2	ENO1	1	0.00591271	44.82	2	YDLDFK(1)SPDDPSR	1.135	1	1						0.927067	0.999921	1.01355	1.01412	0.999733	1.04561	1.079
P06733	5	K	Alpha-enolase OS=Homo sapiens OX=9606 GN=ENO1 PE=1 SV=2	ENO1	1	8.30276e-11	129.56	2	SILK(1)IHAR	0.27848	6	1.22591	1.04631	0.776679	1.32841	0.809725	0.81297	0.927067	0.999921	1.01355	1.01412	0.999733	1.04561	1.322	1.046	0.766	1.31	0.81	0.778	0.925	0.736408
P06733	233	K	Alpha-enolase OS=Homo sapiens OX=9606 GN=ENO1 PE=1 SV=2	ENO1	1	0.00103105	87.942	2	TAIGK(1)AGYTDK	-0.79888	6	1.26637	1.06956	0.787014	1.12614	0.822671	0.928247	0.927067	0.999921	1.01355	1.01412	0.999733	1.04561	1.366	1.07	0.776	1.11	0.823	0.888	0.878	0.581888
P06733	60	K	Alpha-enolase OS=Homo sapiens OX=9606 GN=ENO1 PE=1 SV=2	ENO1	1	0.0417001	74.486	2	YMGK(1)GVSK	-1.1847	2		1.09076			0.90924		0.927067	0.999921	1.01355	1.01412	0.999733	1.04561		1.091			0.909		0.833
P06737	421	K	Glycogen phosphorylase, liver form OS=Homo sapiens OX=9606 GN=PYGL PE=1 SV=4	PYGL	1	0.00214231	69.915	2	IVALFPK(1)DVDR	-3.0691	2				1.3213		0.678697	1.0075	0.942637	0.890841	1.12678	1.03779	0.994452				1.173		0.682
P06744	454	K	Glucose-6-phosphate isomerase OS=Homo sapiens OX=9606 GN=GPI PE=1 SV=4	GPI	1	1.13817e-10	130.65	2	ELQAAGK(1)SPEDLER	-0.82968	5	0.747136	0.909007	0.426883	2.05964	0.857332		0.919228	0.940337	0.972092	1.04126	1.02545	1.10163	0.813	0.967	0.439	1.978	0.836		1.902	0.2671
P06748	27	K	Nucleophosmin OS=Homo sapiens OX=9606 GN=NPM1 PE=1 SV=2	NPM1	1	0.00191176	86.205	2	ADK(1)DYHFK	-0.015506	6	1.43132	1.1252	0.877898	0.990856	0.743235	0.831494	1.09211	0.964435	0.989589	1.08021	0.942146	0.931507	1.311	1.167	0.887	0.917	0.789	0.893	0.772	0.118382
P06748	32	K	Nucleophosmin OS=Homo sapiens OX=9606 GN=NPM1 PE=1 SV=2	NPM1	0.998386	9.48101e-06	50.819	4	ADK(0.002)DYHFK(0.998)VDNDENEHQLSLR	-0.30721	1	1						1.09211	0.964435	0.989589	1.08021	0.942146	0.931507	0.916
P06748	250	K	Nucleophosmin OS=Homo sapiens OX=9606 GN=NPM1 PE=1 SV=2	NPM1	1	0.000216524	133.98	2	AK(1)MQASIEK	0.04278	6	0.997869	1.14751	0.940774	1.05326	0.946013	0.914568	1.09211	0.964435	0.989589	1.08021	0.942146	0.931507	0.914	1.19	0.951	0.975	1.004	0.982	0.969	0.782219
P06748	257	K	Nucleophosmin OS=Homo sapiens OX=9606 GN=NPM1 PE=1 SV=2	NPM1	1	0.00137949	91.245	2	MQASIEK(1)GGSLPK	0.94099	7		0.89548	1.05631	1.23302	0.824412	0.990773	1.09211	0.964435	0.989589	1.08021	0.942146	0.931507		0.929	1.067	1.141	0.875	1.064	1.029	0.844485
P06748	273	K	Nucleophosmin OS=Homo sapiens OX=9606 GN=NPM1 PE=1 SV=2	NPM1	1	0.000194074	113.14	2	FINYVK(1)NCFR	0.10668	6	1.40503	1.24889	0.642766	1.23145	0.86955	0.602302	1.09211	0.964435	0.989589	1.08021	0.942146	0.931507	1.287	1.295	0.65	1.14	0.923	0.647	0.838	0.612384
P06748	248	K	Nucleophosmin OS=Homo sapiens OX=9606 GN=NPM1 PE=1 SV=2	NPM1	1	0.000196449	118.91	2	GPSSVEDIK(1)AK	-1.8817	5	1.19572	0.972988	0.778058	1.0634	0.989834		1.09211	0.964435	0.989589	1.08021	0.942146	0.931507	1.095	1.009	0.786	0.984	1.051		1.056	0.659581
P06748	141	K	Nucleophosmin OS=Homo sapiens OX=9606 GN=NPM1 PE=1 SV=2	NPM1	1	0.000109984	140.12	2	LLSISGK(1)R	-0.21846	6	1.10744	1.04539	0.892001	1.24479	0.841421	0.868968	1.09211	0.964435	0.989589	1.08021	0.942146	0.931507	1.014	1.084	0.901	1.152	0.893	0.933	0.993	0.918108
P06748	150	K	Nucleophosmin OS=Homo sapiens OX=9606 GN=NPM1 PE=1 SV=2	NPM1	1	0.000116651	126.29	2	SAPGGGSK(1)VPQK	0.83003	6	0.91126	1.02286	0.981568	1.27322	0.952987	0.858108	1.09211	0.964435	0.989589	1.08021	0.942146	0.931507	0.834	1.061	0.992	1.179	1.012	0.921	1.078	0.501967
P06748	223	K	Nucleophosmin OS=Homo sapiens OX=9606 GN=NPM1 PE=1 SV=2	NPM1	1	0.00115169	118.06	2	SK(1)GQESFK	0.33417	5		0.529751	0.853733	1.61644	1.03177	0.968305	1.09211	0.964435	0.989589	1.08021	0.942146	0.931507		0.549	0.863	1.496	1.095	1.04	1.714	0.0903358
P06748	239	K	Nucleophosmin OS=Homo sapiens OX=9606 GN=NPM1 PE=1 SV=2	NPM1	1	3.37622e-06	160.62	2	TPK(1)GPSSVEDIK	0.41912	6	0.939051	1.07744	0.874016	1.23606	0.965497	0.907936	1.09211	0.964435	0.989589	1.08021	0.942146	0.931507	0.86	1.117	0.883	1.144	1.025	0.975	1.099	0.356636
P06748	267	K	Nucleophosmin OS=Homo sapiens OX=9606 GN=NPM1 PE=1 SV=2	NPM1	1	0.000711737	88.181	2	VEAK(1)FINYVK	-1.3866	5		1.08363	0.837892	1.2821	0.868813	0.927562	1.09211	0.964435	0.989589	1.08021	0.942146	0.931507		1.124	0.847	1.187	0.922	0.996	1.05	0.733935
P67936	116	K	Tropomyosin alpha-4 chain OS=Homo sapiens OX=9606 GN=TPM4 PE=1 SV=3	TPM4	1	0.000226616	79.889	2	EAK(1)HIAEEADR	-1.0186	6	2.03967	0.935137	0.515414	0.94852	0.936813	0.624446	1.08521	0.908422	0.947015	0.98541	1.01011	1.06383	1.88	1.029	0.544	0.963	0.927	0.587	0.717	0.584906
P07108	55	K	Acyl-CoA-binding protein OS=Homo sapiens OX=9606 GN=DBI PE=1 SV=2	DBI	1	0.00907354	72.365	2	AK(1)WDAWNELK	-0.15349	1				1			1.05023	0.958581	1.14884	1.00887	0.880011	0.953475				0.991
P07195	308	K	L-lactate dehydrogenase B chain OS=Homo sapiens OX=9606 GN=LDHB PE=1 SV=2	LDHB	1	0.0015836	83.623	2	GLTSVINQK(1)LK	0.8567	3	1.37969	0.891087	0.729223				0.994499	0.976417	1.05588	1.0002	0.953006	1.01999	1.387	0.913	0.691
P07195	319	K	L-lactate dehydrogenase B chain OS=Homo sapiens OX=9606 GN=LDHB PE=1 SV=2	LDHB	1	9.60101e-05	110.88	2	K(1)SADTLWDIQK	0.92234	3	1.78269			0.722304		0.495011	0.994499	0.976417	1.05588	1.0002	0.953006	1.01999	1.793			0.722		0.485	0.337
P07195	156	K	L-lactate dehydrogenase B chain OS=Homo sapiens OX=9606 GN=LDHB PE=1 SV=2	LDHB	1	0.00343993	104.76	2	LSGLPK(1)HR	-0.96842	4	1.30791	0.825976		1.37998	0.486134		0.994499	0.976417	1.05588	1.0002	0.953006	1.01999	1.315	0.846		1.38	0.51		0.875	0.714974
P07237	309	K	Protein disulfide-isomerase OS=Homo sapiens OX=9606 GN=P4HB PE=1 SV=3	P4HB	1	0.000312263	121.31	2	K(1)EECPAVR	-0.25681	5		1.34264	1.01354	0.686876	0.892135	1.06481	0.986251	0.97604	0.943839	1.00099	1.04427	1.04861		1.376	1.074	0.686	0.854	1.015	0.695	0.123029
P07237	31	K	Protein disulfide-isomerase OS=Homo sapiens OX=9606 GN=P4HB PE=1 SV=3	P4HB	1	0.00279235	83.775	2	K(1)SNFAEALAAHK	0.67626	2			0.502738			1.49726	0.986251	0.97604	0.943839	1.00099	1.04427	1.04861			0.533			1.428	2.679
P07237	328	K	Protein disulfide-isomerase OS=Homo sapiens OX=9606 GN=P4HB PE=1 SV=3	P4HB	1	0.000264487	74.524	2	YK(1)PESEELTAER	0.67362	6	1.55783	1.66972	0.657036	0.449194	0.923758	0.742466	0.986251	0.97604	0.943839	1.00099	1.04427	1.04861	1.58	1.711	0.696	0.449	0.885	0.708	0.512	0.144591
P07355	47	K	Annexin A2 OS=Homo sapiens OX=9606 GN=ANXA2 PE=1 SV=2	ANXA2	1	3.86827e-05	81.799	2	DALNIETAIK(1)TK	-0.51508	6	1.60654	1.16368	0.466501	1.60337	0.573259	0.586654	0.982893	0.959329	1.02169	1.09898	0.946437	0.990665	1.634	1.213	0.457	1.459	0.606	0.592	0.804	0.725893
P07355	49	K	Annexin A2 OS=Homo sapiens OX=9606 GN=ANXA2 PE=1 SV=2	ANXA2	1	1.73598e-29	190.06	2	TK(1)GVDEVTIVNILTNR	1.0686	6	1.63623	1.56584	0.470733	1.49994	0.637508	0.189757	0.982893	0.959329	1.02169	1.09898	0.946437	0.990665	1.665	1.632	0.461	1.365	0.674	0.192	0.594	0.412028
P07355	204	K	Annexin A2 OS=Homo sapiens OX=9606 GN=ANXA2 PE=1 SV=2	ANXA2	1	0.00032047	109.36	2	DLYDAGVK(1)R	-0.30592	6	1.21695	0.710201	0.939936	1.25803	0.913146	0.961743	0.982893	0.959329	1.02169	1.09898	0.946437	0.990665	1.238	0.74	0.92	1.145	0.965	0.971	1.063	0.640128
P07355	152	K	Annexin A2 OS=Homo sapiens OX=9606 GN=ANXA2 PE=1 SV=2	ANXA2	1	0.000745409	96.311	2	EMYK(1)TDLEK	1.2126	6	1.05316	1.22473	0.766357	1.15038	0.983924	0.821443	0.982893	0.959329	1.02169	1.09898	0.946437	0.990665	1.071	1.277	0.75	1.047	1.04	0.829	0.941	0.818965
P07355	157	K	Annexin A2 OS=Homo sapiens OX=9606 GN=ANXA2 PE=1 SV=2	ANXA2	1	2.27945e-08	124.24	2	TDLEK(1)DIISDTSGDFR	0.78246	5	1.41482	1.13291	0.568957	1.51509		0.368224	0.982893	0.959329	1.02169	1.09898	0.946437	0.990665	1.439	1.181	0.557	1.379		0.372	0.827	0.643177
P07355	81	K	Annexin A2 OS=Homo sapiens OX=9606 GN=ANXA2 PE=1 SV=2	ANXA2	1	0.00105896	100.84	2	K(1)ELASALK	0.0486	4	0.538557		0.688909	1.95837	0.81416		0.982893	0.959329	1.02169	1.09898	0.946437	0.990665	0.548		0.674	1.782	0.86		2.162	0.201056
P07355	169	K	Annexin A2 OS=Homo sapiens OX=9606 GN=ANXA2 PE=1 SV=2	ANXA2	1	0.00363012	70.67	2	K(1)LMVALAK	0.67527	1				1			0.982893	0.959329	1.02169	1.09898	0.946437	0.990665				0.91
P07355	279	K	Annexin A2 OS=Homo sapiens OX=9606 GN=ANXA2 PE=1 SV=2	ANXA2	1	0.0615572	44.767	2	LYDSMK(1)GK	0.23722	1				1			0.982893	0.959329	1.02169	1.09898	0.946437	0.990665				0.91
P07355	302	K	Annexin A2 OS=Homo sapiens OX=9606 GN=ANXA2 PE=1 SV=2	ANXA2	1	0.000242193	98.009	2	SEVDMLK(1)IR	1.319	5		1.20669	0.748069	1.56729	0.896632	0.581323	0.982893	0.959329	1.02169	1.09898	0.946437	0.990665		1.258	0.732	1.426	0.947	0.587	0.992	0.931485
P07355	324	K	Annexin A2 OS=Homo sapiens OX=9606 GN=ANXA2 PE=1 SV=2	ANXA2	1	4.09439e-12	84.102	2	SLYYYIQQDTK(1)GDYQK	-0.59195	4	0.818159		0.848788	2.01594	0.317109		0.982893	0.959329	1.02169	1.09898	0.946437	0.990665	0.832		0.831	1.834	0.335		1.304	0.950949
P07355	227	K	Annexin A2 OS=Homo sapiens OX=9606 GN=ANXA2 PE=1 SV=2	ANXA2	1	0.00110568	88.24	2	SVPHLQK(1)VFDR	-0.29259	6	1.31433	1.05024		1.19625	0.710538	0.728644	0.982893	0.959329	1.02169	1.09898	0.946437	0.990665	1.337	1.095		1.089	0.751	0.736	0.706	0.140204
P07355	115	K	Annexin A2 OS=Homo sapiens OX=9606 GN=ANXA2 PE=1 SV=2	ANXA2	1	7.16057e-11	105.78	2	TPAQYDASELK(1)ASMK	-0.70833	6	1.44621	1.22815	0.720275	1.01885	0.781991	0.804514	0.982893	0.959329	1.02169	1.09898	0.946437	0.990665	1.471	1.28	0.705	0.927	0.826	0.812	0.742	0.332256
P07355	313	K	Annexin A2 OS=Homo sapiens OX=9606 GN=ANXA2 PE=1 SV=2	ANXA2	1	0.0375166	61.042	2	YGK(1)SLYYYIQQDTK	-0.54005	1				1			0.982893	0.959329	1.02169	1.09898	0.946437	0.990665				0.91
P07437	58	K	Tubulin beta chain OS=Homo sapiens OX=9606 GN=TUBB PE=1 SV=2	TUBB	1	0.0741282	45.183	2	ISVYYNEATGGK(1)YVPR	-0.36049	1				1			0.991508	0.995216	0.974468	0.950872	0.97119	1.11675				1.052
P07737	126	K	Profilin-1 OS=Homo sapiens OX=9606 GN=PFN1 PE=1 SV=2	PFN1	1	8.76105e-05	138.26	2	EGVHGGLINK(1)K	0.85899	6	1.23114	1.40062	0.927069	0.691552	0.780145	0.969474
P07737	127	K	Profilin-1 OS=Homo sapiens OX=9606 GN=PFN1 PE=1 SV=2	PFN1	1	0.000180546	136.84	2	K(1)CYEMASHLR	1.0034	6	1.14252	1.38457	0.940742	0.635516	0.788226	1.10842
P07737	105	K	Profilin-1 OS=Homo sapiens OX=9606 GN=PFN1 PE=1 SV=2	PFN1	1	1.51023e-12	135.24	2	STGGAPTFNVTVTK(1)TDK	-1.1011	6	1.6167	1.285	0.622865	1.33522	0.561321	0.578895
P07737	108	K	Profilin-1 OS=Homo sapiens OX=9606 GN=PFN1 PE=1 SV=2	PFN1	1	0.000543074	99.34	2	TDK(1)TLVLLMGK	-1.4954	2	0.873132			1.12687
P07737	91	K	Profilin-1 OS=Homo sapiens OX=9606 GN=PFN1 PE=1 SV=2	PFN1	1	1.57564e-17	146.48	2	TK(1)STGGAPTFNVTVTK	-0.95617	6	1.56605	0.957554	0.699468	1.40075	0.624971	0.751203
P07864	224	K	L-lactate dehydrogenase C chain OS=Homo sapiens OX=9606 GN=LDHC PE=1 SV=4	LDHC	1	0.0648099	48.157	2	LGTDSDK(1)EHWK	18.771	2	1.31898			0.681019			0.923721	0.975119	0.975157	1.10993	1.01608		1.428			0.614			0.43
P07900	112	K	Heat shock protein HSP 90-alpha OS=Homo sapiens OX=9606 GN=HSP90AA1 PE=1 SV=5	HSP90AA1	1	3.83034e-13	128.46	2	ADLINNLGTIAK(1)SGTK	0.12003	6	1.61891	1.24305	0.739812	0.939668	0.660682	0.797872	0.947441	0.999819	1.08099	0.954965	0.988823	1.02796	1.709	1.243	0.684	0.984	0.668	0.776	0.668	0.296834
P07900	539	K	Heat shock protein HSP 90-alpha OS=Homo sapiens OX=9606 GN=HSP90AA1 PE=1 SV=5	HSP90AA1	1	0.018197	55.754	2	EFEGK(1)TLVSVTK	-2.2241	2		1.37881				0.621194	0.947441	0.999819	1.08099	0.954965	0.988823	1.02796		1.379				0.604	0.438
P07900	283	K	Heat shock protein HSP 90-alpha OS=Homo sapiens OX=9606 GN=HSP90AA1 PE=1 SV=5	HSP90AA1	1	2.01736e-22	224.13	2	EK(1)YIDQEELNK	-0.071428	6	1.11018	1.07819	0.963398	0.941987	0.935022	0.971223	0.947441	0.999819	1.08099	0.954965	0.988823	1.02796	1.172	1.078	0.891	0.986	0.946	0.945	0.916	0.37799
P07900	292	K	Heat shock protein HSP 90-alpha OS=Homo sapiens OX=9606 GN=HSP90AA1 PE=1 SV=5	HSP90AA1	1	0.000100853	108.93	2	YIDQEELNK(1)TK	0.045331	3	1.38053	1.00131	0.61816				0.947441	0.999819	1.08099	0.954965	0.988823	1.02796	1.457	1.001	0.572
P07900	407	K	Heat shock protein HSP 90-alpha OS=Homo sapiens OX=9606 GN=HSP90AA1 PE=1 SV=5	HSP90AA1	1	0.00028466	84.368	2	EMLQQSK(1)ILK	-0.33244	6	1.12761	1.00479	0.815995	1.46068	0.842486	0.748435	0.947441	0.999819	1.08099	0.954965	0.988823	1.02796	1.19	1.005	0.755	1.53	0.852	0.728	1.054	0.952593
P07900	489	K	Heat shock protein HSP 90-alpha OS=Homo sapiens OX=9606 GN=HSP90AA1 PE=1 SV=5	HSP90AA1	1	0.000475188	73.891	2	ENQK(1)HIYYITGETK	-1.53	1	1						0.947441	0.999819	1.08099	0.954965	0.988823	1.02796	1.055
P07900	185	K	Heat shock protein HSP 90-alpha OS=Homo sapiens OX=9606 GN=HSP90AA1 PE=1 SV=5	HSP90AA1	1	0.00121579	88.181	2	GTK(1)VILHLK	0.12232	6	1.29706	1.45035	0.851211	0.56402	0.939559	0.897797	0.947441	0.999819	1.08099	0.954965	0.988823	1.02796	1.369	1.451	0.787	0.591	0.95	0.873	0.669	0.187782
P07900	615	K	Heat shock protein HSP 90-alpha OS=Homo sapiens OX=9606 GN=HSP90AA1 PE=1 SV=5	HSP90AA1	1	0.00105648	131.3	2	IMK(1)AQALR	-1.2392	7	1.23684		1.12858	1.44452	0.19005		0.947441	0.999819	1.08099	0.954965	0.988823	1.02796	1.305		1.044	1.513	0.192		0.726	0.53427
P07900	632	K	Heat shock protein HSP 90-alpha OS=Homo sapiens OX=9606 GN=HSP90AA1 PE=1 SV=5	HSP90AA1	1	1.05873e-09	127.07	3	K(1)HLEINPDHSIIETLR	0.34557	6	1.49931	1.39214	0.933682	0.632768	0.775211	0.766892	0.947441	0.999819	1.08099	0.954965	0.988823	1.02796	1.582	1.392	0.864	0.663	0.784	0.746	0.571	0.0497585
P07900	458	K	Heat shock protein HSP 90-alpha OS=Homo sapiens OX=9606 GN=HSP90AA1 PE=1 SV=5	HSP90AA1	1	0.023883	76.833	2	K(1)LSELLR	-0.083212	1	1						0.947441	0.999819	1.08099	0.954965	0.988823	1.02796	1.055
P07900	585	K	Heat shock protein HSP 90-alpha OS=Homo sapiens OX=9606 GN=HSP90AA1 PE=1 SV=5	HSP90AA1	0.999836	0.0059377	99.34	2	KVEK(1)VVVSNR	-0.36716	6	1.15663	1.22276	0.856113	1.02059	0.859543	0.884361	0.947441	0.999819	1.08099	0.954965	0.988823	1.02796	1.221	1.223	0.792	1.069	0.869	0.86	0.865	0.462212
P07900	446	K	Heat shock protein HSP 90-alpha OS=Homo sapiens OX=9606 GN=HSP90AA1 PE=1 SV=5	HSP90AA1	1	0.000149477	101.45	2	NIK(1)LGIHEDSQNR	0.084293	2			1.10514		0.894859		0.947441	0.999819	1.08099	0.954965	0.988823	1.02796			1.022		0.905		0.886
P07900	294	K	Heat shock protein HSP 90-alpha OS=Homo sapiens OX=9606 GN=HSP90AA1 PE=1 SV=5	HSP90AA1	1	0.0204618	65.313	2	TK(1)PIWTR	-0.012343	3			0.686691	1.49476		0.818552	0.947441	0.999819	1.08099	0.954965	0.988823	1.02796			0.635	1.565		0.796	1.859
P07900	69	K	Heat shock protein HSP 90-alpha OS=Homo sapiens OX=9606 GN=HSP90AA1 PE=1 SV=5	HSP90AA1	1	8.66815e-12	128.97	2	YESLTDPSK(1)LDSGK	1.5883	5	1.17856	1.14883	0.972076		0.858468	0.842068	0.947441	0.999819	1.08099	0.954965	0.988823	1.02796	1.244	1.149	0.899		0.868	0.819	0.769	0.141338
P07910	8	K	Heterogeneous nuclear ribonucleoproteins C1/C2 OS=Homo sapiens OX=9606 GN=HNRNPC PE=1 SV=4	HNRNPC	1	3.15073e-07	195.4	2	ASNVTNK(1)TDPR	-0.21732	6	1.2451	0.996724	0.845438	1.27903	0.798468	0.835241	1.03125	0.930317	1.02685	1.03464	0.922697	1.05424	1.207	1.071	0.823	1.236	0.865	0.792	0.933	0.689329
P07910	157	K	Heterogeneous nuclear ribonucleoproteins C1/C2 OS=Homo sapiens OX=9606 GN=HNRNPC PE=1 SV=4	HNRNPC	1	0.00947419	80.294	2	AVVPSK(1)R	-1.5257	6	1.17312	0.84868	0.85527	1.54183	0.759161	0.821941	1.03125	0.930317	1.02685	1.03464	0.922697	1.05424	1.138	0.912	0.833	1.49	0.823	0.78	1.073	0.889255
P07910	204	K	Heterogeneous nuclear ribonucleoproteins C1/C2 OS=Homo sapiens OX=9606 GN=HNRNPC PE=1 SV=4	HNRNPC	1	0.0243711	53.679	2	ELTQIK(1)QK	0.3958	2	1.44356					0.556436	1.03125	0.930317	1.02685	1.03464	0.922697	1.05424	1.4					0.528	0.377
P07910	223	K	Heterogeneous nuclear ribonucleoproteins C1/C2 OS=Homo sapiens OX=9606 GN=HNRNPC PE=1 SV=4	HNRNPC	1	9.01742e-05	142.56	2	EQSK(1)QAVEMK	-1.0766	2			0.742704			1.2573	1.03125	0.930317	1.02685	1.03464	0.922697	1.05424			0.723			1.193	1.65
P07910	189	K	Heterogeneous nuclear ribonucleoproteins C1/C2 OS=Homo sapiens OX=9606 GN=HNRNPC PE=1 SV=4	HNRNPC	1	0.00530752	62.271	2	LK(1)GDDLQAIK	2.522	4			0.828372	1.08714	1.08182	1.00266	1.03125	0.930317	1.02685	1.03464	0.922697	1.05424			0.807	1.051	1.172	0.951	1.311
P07910	176	K	Heterogeneous nuclear ribonucleoproteins C1/C2 OS=Homo sapiens OX=9606 GN=HNRNPC PE=1 SV=4	HNRNPC	1	0.000193945	135.63	2	SGFNSK(1)SGQR	0.050646	4			0.64325	1.60211	0.810362	0.944275	1.03125	0.930317	1.02685	1.03464	0.922697	1.05424			0.626	1.548	0.878	0.896	1.769
P08237	678	K	ATP-dependent 6-phosphofructokinase, muscle type OS=Homo sapiens OX=9606 GN=PFKM PE=1 SV=2	PFKM	1	0.000336411	125.5	2	NFATK(1)MGAK	-0.20221	10	0.919644	1.04972	0.844958	1.44681	0.738865		1.02851	0.958629	1.00355	1.03707	0.946582	1.02566	0.894	1.095	0.842	1.395	0.781		1.153	0.684334
P08238	559	K	Heat shock protein HSP 90-beta OS=Homo sapiens OX=9606 GN=HSP90AB1 PE=1 SV=4	HSP90AB1	1	0.00321253	93.561	2	AK(1)FENLCK	-0.12912	4	0.777348	1.30253	0.954817		0.965306		0.905703	0.998875	1.07744	0.921125	1.06844	1.02842	0.858	1.304	0.886		0.903		0.889
P08238	347	K	Heat shock protein HSP 90-beta OS=Homo sapiens OX=9606 GN=HSP90AB1 PE=1 SV=4	HSP90AB1	1	0.0432772	60	2	RAPFDLFENK(1)K	-0.32617	2	1.49689		0.503108				0.905703	0.998875	1.07744	0.921125	1.06844	1.02842	1.653		0.467
P08238	624	K	Heat shock protein HSP 90-beta OS=Homo sapiens OX=9606 GN=HSP90AB1 PE=1 SV=4	HSP90AB1	1	1.12521e-05	84.58	3	K(1)HLEINPDHPIVETLR	1.0475	6	0.792855	1.4996	1.13297	0.605669	0.950301	1.01861	0.905703	0.998875	1.07744	0.921125	1.06844	1.02842	0.875	1.501	1.052	0.658	0.889	0.99	0.74	0.220989
P08238	577	K	Heat shock protein HSP 90-beta OS=Homo sapiens OX=9606 GN=HSP90AB1 PE=1 SV=4	HSP90AB1	0.99993	0.0208076	79.311	2	KVEK(1)VTISNR	-0.53884	3	1.22484	1.08152	0.693634				0.905703	0.998875	1.07744	0.921125	1.06844	1.02842	1.352	1.083	0.644
P08238	438	K	Heat shock protein HSP 90-beta OS=Homo sapiens OX=9606 GN=HSP90AB1 PE=1 SV=4	HSP90AB1	1	0.00234383	78.864	2	NLK(1)LGIHEDSTNR	-0.64463	1		1					0.905703	0.998875	1.07744	0.921125	1.06844	1.02842		1.001
P08397	70	K	Porphobilinogen deaminase OS=Homo sapiens OX=9606 GN=HMBS PE=1 SV=2	HMBS	1	3.86827e-05	117.99	2	ILDTALSK(1)IGEK	0.48293	6	1.16681	0.968494	0.749961	1.57824	0.793355	0.743136	1.15494	0.98908	0.921931	1.11273	0.999089	0.82223	1.01	0.979	0.813	1.418	0.794	0.904	1.112	0.697659
P08579	111	K	U2 small nuclear ribonucleoprotein B'' OS=Homo sapiens OX=9606 GN=SNRPB2 PE=1 SV=1	SNRPB2	1	2.48263e-34	228.28	2	AK(1)TVEQTATTTNK	-0.22767	6	1.0199	1.06374	1.02467	1.0917	0.847071	0.952923	0.944847	0.922676	1.09417	0.948608	1.06969	1.02001	1.079	1.153	0.936	1.151	0.792	0.934	0.908	0.448787
P08579	93	K	U2 small nuclear ribonucleoprotein B'' OS=Homo sapiens OX=9606 GN=SNRPB2 PE=1 SV=1	SNRPB2	1	0.000307441	85.716	2	TDSDIISK(1)MR	-0.58175	4			0.906598	1.36804	0.926942	0.798419	0.944847	0.922676	1.09417	0.948608	1.06969	1.02001			0.829	1.442	0.867	0.783	1.243
P08651	280	K	Nuclear factor 1 C-type OS=Homo sapiens OX=9606 GN=NFIC PE=1 SV=2	NFIC	1	0.00049115	78.932	2	TLPSTSSSGSK(1)R	0.052156	6	0.927166	0.750961	0.988875	1.29213	0.909496	1.13137	1.02511	0.991308	0.939009	1.08572	0.898265	1.06059	0.904	0.758	1.053	1.19	1.013	1.067	1.204	0.143716
P08670	188	K	Vimentin OS=Homo sapiens OX=9606 GN=VIM PE=1 SV=4	VIM	1	0.000333503	105.36	2	EK(1)LQEEMLQR	1.1873	1	1						1.28981	0.824389	1.0878	0.824281	0.851111	1.12261	0.775
P08670	439	K	Vimentin OS=Homo sapiens OX=9606 GN=VIM PE=1 SV=4	VIM	1	1.37653e-22	150.81	2	ETNLDSLPLVDTHSK(1)R	-0.53509	10	1.87215	0.497989	0.702837	0.991849	0.91017	1.025	1.28981	0.824389	1.0878	0.824281	0.851111	1.12261	1.451	0.604	0.646	1.203	1.069	0.913	1.179	0.452905
P08670	120	K	Vimentin OS=Homo sapiens OX=9606 GN=VIM PE=1 SV=4	VIM	1	0.00173457	91.783	2	FANYIDK(1)VR	0.78708	5	2.22664	0.829328	0.86265	0.53581	0.545568		1.28981	0.824389	1.0878	0.824281	0.851111	1.12261	1.726	1.006	0.793	0.65	0.641		0.549	0.164276
P08670	139	K	Vimentin OS=Homo sapiens OX=9606 GN=VIM PE=1 SV=4	VIM	1	2.92325e-05	88.24	2	ILLAELEQLK(1)GQGK	0.98791	1	1						1.28981	0.824389	1.0878	0.824281	0.851111	1.12261	0.775
P08670	223	K	Vimentin OS=Homo sapiens OX=9606 GN=VIM PE=1 SV=4	VIM	1	1.31859e-05	74.524	2	K(1)VESLQEEIAFLK	1.8912	5	1.57698	1.42627	0.538104	0.710709	0.747933		1.28981	0.824389	1.0878	0.824281	0.851111	1.12261	1.223	1.73	0.495	0.862	0.879		0.757	0.769905
P08670	235	K	Vimentin OS=Homo sapiens OX=9606 GN=VIM PE=1 SV=4	VIM	1	0.0135149	73.891	2	KVESLQEEIAFLK(1)K	-0.88574	1	1						1.28981	0.824389	1.0878	0.824281	0.851111	1.12261	0.775
P08670	168	K	Vimentin OS=Homo sapiens OX=9606 GN=VIM PE=1 SV=4	VIM	1	0.00611149	65.933	2	QVDQLTNDK(1)AR	0.67853	1	1						1.28981	0.824389	1.0878	0.824281	0.851111	1.12261	0.775
P08670	294	K	Vimentin OS=Homo sapiens OX=9606 GN=VIM PE=1 SV=4	VIM	1	8.70771e-07	160.98	2	SK(1)FADLSEAANR	0.25309	5	1.61758	0.970853	0.770842		0.681829	0.958899	1.28981	0.824389	1.0878	0.824281	0.851111	1.12261	1.254	1.178	0.709		0.801	0.854	0.79	0.445497
P08670	445	K	Vimentin OS=Homo sapiens OX=9606 GN=VIM PE=1 SV=4	VIM	1	9.40444e-05	178.95	2	TLLIK(1)TVETR	-0.35772	6	1.26372	0.700701	0.971436	0.640374	1.24807	1.17569	1.28981	0.824389	1.0878	0.824281	0.851111	1.12261	0.98	0.85	0.893	0.777	1.466	1.047	1.208	0.44985
P08708	19	K	40S ribosomal protein S17 OS=Homo sapiens OX=9606 GN=RPS17 PE=1 SV=2	RPS17	1	0.0304642	67.507	2	VIIEK(1)YYTR	-0.10054	2			1.11719		0.882806		1.08396	1.04034	0.965447	0.93157	0.984951	0.993734			1.157		0.896		0.774
P08865	42	K	40S ribosomal protein SA OS=Homo sapiens OX=9606 GN=RPSA PE=1 SV=4	RPSA	1	3.63186e-05	159.93	2	K(1)SDGIYIINLK	0.27604	6	0.809703	1.05468	1.04635	1.12504	0.95173	1.0125	1.01352	0.967306	1.00198	1.01784	1.00177	0.997583	0.799	1.09	1.044	1.105	0.95	1.015	1.047	0.645755
P09382	64	K	Galectin-1 OS=Homo sapiens OX=9606 GN=LGALS1 PE=1 SV=2	LGALS1	1	1.15928e-22	113.93	3	FNAHGDANTIVCNSK(1)DGGAWGTEQR	2.0269	1	1						1.03433	0.916875	1.03557	0.96865	0.96865	1.07592	0.967
P09382	29	K	Galectin-1 OS=Homo sapiens OX=9606 GN=LGALS1 PE=1 SV=2	LGALS1	1	0.000859754	56.938	2	GEVAPDAK(1)SFVLNLGK	0.27837	2	0.90803			1.09197			1.03433	0.916875	1.03557	0.96865	0.96865	1.07592	0.878			1.127			1.284
P09429	90	K	High mobility group protein B1 OS=Homo sapiens OX=9606 GN=HMGB1 PE=1 SV=3	HMGB1	1	0.000837331	137.88	2	FK(1)DPNAPK	-1.7279	6	1.35078	1.00226	0.820304	1.4296	0.683355	0.713705	1.19089	0.970061	0.945936	1.16046	0.859816	0.872835	1.134	1.033	0.867	1.232	0.795	0.818	0.938	0.65092
P09429	82	K	High mobility group protein B1 OS=Homo sapiens OX=9606 GN=HMGB1 PE=1 SV=3	HMGB1	1	0.0218551	46.447	2	TYIPPK(1)GETK	-0.009832	2		1					1.19089	0.970061	0.945936	1.16046	0.859816	0.872835		1.031
P09429	157	K	High mobility group protein B1 OS=Homo sapiens OX=9606 GN=HMGB1 PE=1 SV=3	HMGB1	1	0.0510954	43.734	2	YEK(1)DIAAYR	0.81167	1				1			1.19089	0.970061	0.945936	1.16046	0.859816	0.872835				0.862
P09496	223	K	Clathrin light chain A OS=Homo sapiens OX=9606 GN=CLTA PE=1 SV=1	CLTA	1	0.000219715	109.88	2	LCDFNPK(1)SSK	-0.2861	5	0.828368	1.00417	0.884348	1.19574	1.08737		1.00411	0.924179	1.03698	1.03598	0.89459	1.10416	0.825	1.087	0.853	1.154	1.215		1.285	0.10799
P09496	242	K	Clathrin light chain A OS=Homo sapiens OX=9606 GN=CLTA PE=1 SV=1	CLTA	1	0.000848976	50.834	2	SVLISLK(1)QAPLVH	-0.4255	1				1			1.00411	0.924179	1.03698	1.03598	0.89459	1.10416				0.965
P09497	204	K	Clathrin light chain B OS=Homo sapiens OX=9606 GN=CLTB PE=1 SV=1	CLTB	1	2.22533e-07	140.57	2	VAQLCDFNPK(1)SSK	-0.51104	6	0.88848	1.17102	0.833837	1.26451	1.0606	0.781554	1.10694	1.01428	1.02425	1.05285	0.899474	0.902214	0.803	1.155	0.814	1.201	1.179	0.866	1.171	0.367741
P09651	105	K	Heterogeneous nuclear ribonucleoprotein A1 OS=Homo sapiens OX=9606 GN=HNRNPA1 PE=1 SV=5	HNRNPA1	1	2.5117e-07	119.43	3	EDSQRPGAHLTVK(1)K	1.285	5	1.25478	1.34624	0.934239	0.695805		0.768934	0.964162	0.990255	1.03339	0.985814	1.00934	1.01703	1.301	1.359	0.904	0.706		0.756	0.615	0.0686404
P09651	8	K	Heterogeneous nuclear ribonucleoprotein A1 OS=Homo sapiens OX=9606 GN=HNRNPA1 PE=1 SV=5	HNRNPA1	1	0.000163541	81.335	2	SESPK(1)EPEQLR	-0.46843	3		1.15396		1.16304	0.683009		0.964162	0.990255	1.03339	0.985814	1.00934	1.01703		1.165		1.18	0.677		0.797
P09651	3	K	Heterogeneous nuclear ribonucleoprotein A1 OS=Homo sapiens OX=9606 GN=HNRNPA1 PE=1 SV=5	HNRNPA1	1	9.50151e-10	176.97	2	SK(1)SESPKEPEQLR	0.25726	11	1.42661	1.04501	0.815238	1.00319	0.820293	0.88965	0.964162	0.990255	1.03339	0.985814	1.00934	1.01703	1.48	1.055	0.789	1.018	0.813	0.875	0.814	0.411708
P09651	350	K	Heterogeneous nuclear ribonucleoprotein A1 OS=Homo sapiens OX=9606 GN=HNRNPA1 PE=1 SV=5	HNRNPA1	1	5.92081e-68	248.59	2	SSGPYGGGGQYFAK(1)PR	-1.0574	10	0.986036	1.05297	0.854915	1.33278	0.92273	0.850574	0.964162	0.990255	1.03339	0.985814	1.00934	1.01703	1.023	1.063	0.827	1.352	0.914	0.836	1.065	0.795697
P09661	172	K	U2 small nuclear ribonucleoprotein A' OS=Homo sapiens OX=9606 GN=SNRPA1 PE=1 SV=2	SNRPA1	1	0.000282484	123.5	2	GAQLAK(1)DIARR	0.1611	8	1.05443	1.05185	0.934763	1.17962	0.891999	0.887343	0.99245	0.969848	1.05944	1.03732	0.973367	0.967574	1.062	1.085	0.882	1.137	0.916	0.917	0.981	0.841952
P09661	193	K	U2 small nuclear ribonucleoprotein A' OS=Homo sapiens OX=9606 GN=SNRPA1 PE=1 SV=2	SNRPA1	1	0.000159443	89.382	2	K(1)GGPSPGDVEAIK	0.94655	6	0.766429	1.20278	0.99688	1.50688	0.792879	0.734147	0.99245	0.969848	1.05944	1.03732	0.973367	0.967574	0.772	1.24	0.941	1.453	0.815	0.759	1.025	0.997757
P09661	221	K	U2 small nuclear ribonucleoprotein A' OS=Homo sapiens OX=9606 GN=SNRPA1 PE=1 SV=2	SNRPA1	1	0.00196188	64.266	2	LK(1)GLLQSGQIPGR	0.66688	2		0.894784		1.10522			0.99245	0.969848	1.05944	1.03732	0.973367	0.967574		0.923		1.065			1.154
P09661	179	K	U2 small nuclear ribonucleoprotein A' OS=Homo sapiens OX=9606 GN=SNRPA1 PE=1 SV=2	SNRPA1	1	3.8944e-23	218.12	2	SK(1)TFNPGAGLPTDK	-0.63742	6	0.957998	1.03329	0.921849	1.1593	0.956274	0.971292	0.99245	0.969848	1.05944	1.03732	0.973367	0.967574	0.965	1.065	0.87	1.118	0.982	1.004	1.07	0.380284
P09661	191	K	U2 small nuclear ribonucleoprotein A' OS=Homo sapiens OX=9606 GN=SNRPA1 PE=1 SV=2	SNRPA1	1	0.0565949	57.003	2	TFNPGAGLPTDK(1)K	4.1794	1			1				0.99245	0.969848	1.05944	1.03732	0.973367	0.967574			0.944
P09874	108	K	Poly [ADP-ribose] polymerase 1 OS=Homo sapiens OX=9606 GN=PARP1 PE=1 SV=4	PARP1	1	0.000122554	71.219	2	AEK(1)TLGDFAAEYAK	-1.7323	1				1			1.01562	0.925873	0.966375	1.05723	1.0023	1.0326				0.946
P09874	518	K	Poly [ADP-ribose] polymerase 1 OS=Homo sapiens OX=9606 GN=PARP1 PE=1 SV=4	PARP1	1	0.000307917	137.84	2	EEGINK(1)SEK	0.56251	5		0.901748	0.852089	1.21244	1.11226	0.921464	1.01562	0.925873	0.966375	1.05723	1.0023	1.0326		0.974	0.882	1.147	1.11	0.892	1.131	0.354668
P09874	105	K	Poly [ADP-ribose] polymerase 1 OS=Homo sapiens OX=9606 GN=PARP1 PE=1 SV=4	PARP1	1	0.000759776	92.445	2	GQDGIGSK(1)AEK	0.25323	5	0.570337	1.05026	0.792568	1.52705	1.05978		1.01562	0.925873	0.966375	1.05723	1.0023	1.0326	0.562	1.134	0.82	1.444	1.057		1.491	0.232305
P09874	512	K	Poly [ADP-ribose] polymerase 1 OS=Homo sapiens OX=9606 GN=PARP1 PE=1 SV=4	PARP1	1	0.000193772	118.91	2	GQVK(1)EEGINK	1.1405	4		1.0095		0.874727	1.11872	0.997052	1.01562	0.925873	0.966375	1.05723	1.0023	1.0326		1.09		0.827	1.116	0.966	0.89
P09874	654	K	Poly [ADP-ribose] polymerase 1 OS=Homo sapiens OX=9606 GN=PARP1 PE=1 SV=4	PARP1	1	2.23153e-06	124.81	2	K(1)LTVNPGTK	0.46367	6	1.07376	1.01394	0.69737	1.23074	0.980791	1.0034	1.01562	0.925873	0.966375	1.05723	1.0023	1.0326	1.057	1.095	0.722	1.164	0.979	0.972	1.084	0.554448
P09874	528	K	Poly [ADP-ribose] polymerase 1 OS=Homo sapiens OX=9606 GN=PARP1 PE=1 SV=4	PARP1	1	3.60673e-22	156.48	3	LTLK(1)GGAAVDPDSGLEHSAHVLEK	-0.16095	4	1.05641	0.821117		1.69069		0.431785	1.01562	0.925873	0.966375	1.05723	1.0023	1.0326	1.04	0.887		1.599		0.418	1.047	0.833714
P09874	97	K	Poly [ADP-ribose] polymerase 1 OS=Homo sapiens OX=9606 GN=PARP1 PE=1 SV=4	PARP1	1	4.57172e-76	271.8	2	TAEAGGVTGK(1)GQDGIGSK	0.50829	6	1.17004	0.955751	0.924343	1.10996	0.931993	0.907913	1.01562	0.925873	0.966375	1.05723	1.0023	1.0326	1.152	1.032	0.957	1.05	0.93	0.879	0.91	0.279539
P09884	125	K	DNA polymerase alpha catalytic subunit OS=Homo sapiens OX=9606 GN=POLA1 PE=1 SV=2	POLA1	1	0.00345422	87.895	2	K(1)LAVTKPNNIK	-0.43552	2					0.794712	1.20529		0.750594	1.21144	0.467509	1.21025	1.36021					0.657	0.886
P09972	42	K	Fructose-bisphosphate aldolase C OS=Homo sapiens OX=9606 GN=ALDOC PE=1 SV=2	ALDOC	1	0.00226806	47.361	2	GILAADESVGSMAK(1)R	9.9312	1						1	0.897272	0.915276	1.02091	1.08502	0.963901	1.11762						0.895
Q71UI9	116	K	Histone H2A.V OS=Homo sapiens OX=9606 GN=H2AZ2 PE=1 SV=3	H2AZ2	1	5.18068e-11	116.36	2	ATIAGGGVIPHIHK(1)SLIGK	0.033539	11	1.1474	0.924359	0.830018	1.53282	0.777224	0.788171
Q99878	96	K	Histone H2A type 1-J OS=Homo sapiens OX=9606 GN=H2AC14 PE=1 SV=3	H2AC14	1	0.017653	50.09	2	NDEELNK(1)LLGK	2.1795	1				1
Q99878	119	K	Histone H2A type 1-J OS=Homo sapiens OX=9606 GN=H2AC14 PE=1 SV=3	H2AC14	1	3.35283e-06	89.359	3	VTIAQGGVLPNIQAVLLPK(1)K	0.90324	3	0.946908	0.699274		1.35382
P0C7T5	405	K	Ataxin-1-like OS=Homo sapiens OX=9606 GN=ATXN1L PE=1 SV=1	ATXN1L	1	0.00162451	53.051	4	GFYPQSHQEPVK(1)HRPLPK	1.8644	1			1
P0C7T5	389	K	Ataxin-1-like OS=Homo sapiens OX=9606 GN=ATXN1L PE=1 SV=1	ATXN1L	1	0.00283909	64.266	2	NPAELAEK(1)SQAR	0.044041	2		1.03172				0.968278
P62987	48	K	Ubiquitin-60S ribosomal protein L40 OS=Homo sapiens OX=9606 GN=UBA52 PE=1 SV=2	UBA52	1	1.1104e-05	114.39	2	LIFAGK(1)QLEDGR	0.84507	6	1.32942	1.12732	0.84213	1.00969	0.911452	0.779984
P62987	6	K	Ubiquitin-60S ribosomal protein L40 OS=Homo sapiens OX=9606 GN=UBA52 PE=1 SV=2	UBA52	1	0.000184967	108.93	4	QIFVK(1)TLTGK(1)TITLEVEPSDTIENVK	-1.5037	6	0.625058		0.76254	1.81932		0.793085
P62987	11	K	Ubiquitin-60S ribosomal protein L40 OS=Homo sapiens OX=9606 GN=UBA52 PE=1 SV=2	UBA52	1	0.00333597	59.625	4	QIFVK(1)TLTGK(1)TITLEVEPSDTIENVK	-1.5037	1	1
P62987	63	K	Ubiquitin-60S ribosomal protein L40 OS=Homo sapiens OX=9606 GN=UBA52 PE=1 SV=2	UBA52	1	4.12915e-11	111.38	3	TLSDYNIQK(1)ESTLHLVLR	-0.086675	6	1.15327	1.35075	0.376237	1.81127	0.540982	0.767488
P0DMV9	507	K	Heat shock 70 kDa protein 1B OS=Homo sapiens OX=9606 GN=HSPA1B PE=1 SV=1	HSPA1B	1	0.00720482	74.486	2	ITITNDK(1)GR	0.90288	3		1.29234	0.9707	0.736962			0.87036	1.00144	0.974332	0.968735	1.10237	1.08277		1.29	0.996	0.761			0.666
P0DMV9	526	K	Heat shock 70 kDa protein 1B OS=Homo sapiens OX=9606 GN=HSPA1B PE=1 SV=1	HSPA1B	1	0.0556689	49.96	2	YK(1)AEDEVQR	-1.0379	1		1					0.87036	1.00144	0.974332	0.968735	1.10237	1.08277		0.999
P0DP25	22	K	Calmodulin-3 OS=Homo sapiens OX=9606 GN=CALM3 PE=1 SV=1	CALM3	1	7.00265e-05	83.474	2	EAFSLFDK(1)DGDGTITTK	1.6847	1				1			0.974185	0.975419	1.07826	0.964478	0.973046	1.03461				1.037
P0DP25	78	K	Calmodulin-3 OS=Homo sapiens OX=9606 GN=CALM3 PE=1 SV=1	CALM3	1	0.000127859	71.066	2	MK(1)DTDSEEEIR	-0.64077	2	1.36313					0.636872	0.974185	0.975419	1.07826	0.964478	0.973046	1.03461	1.399					0.616	0.44
P16403	106	K	Histone H1.2 OS=Homo sapiens OX=9606 GN=H1-2 PE=1 SV=2	H1-2	1	0.0354351	47.561	2	GTGASGSFK(1)LNK	-0.81319	1	1
P16403	97	K	Histone H1.2 OS=Homo sapiens OX=9606 GN=H1-2 PE=1 SV=2	H1-2	1	1.28371e-22	165.02	2	GTLVQTK(1)GTGASGSFK	0.43052	5	1.37652	0.738832	0.799393		1.23696	0.848303
P16403	64	K	Histone H1.2 OS=Homo sapiens OX=9606 GN=H1-2 PE=1 SV=2	H1-2	1	3.57198e-05	76.255	2	K(1)ALAAAGYDVEK	0.90103	6	1.29896	0.910617	0.875505	0.904792	1.02669	0.983432
P16403	34	K	Histone H1.2 OS=Homo sapiens OX=9606 GN=H1-2 PE=1 SV=2	H1-2	1	0.000424629	99.589	2	K(1)ASGPPVSELITK	-0.20788	6	1.28796	0.789328	0.871114	1.47045	0.791066	0.790076
P16403	90	K	Histone H1.2 OS=Homo sapiens OX=9606 GN=H1-2 PE=1 SV=2	H1-2	1	1.24853e-05	112.93	2	SLVSK(1)GTLVQTK	0.50134	5		0.897926	0.870054	1.20782	0.962248	1.06195
P10809	133	K	60 kDa heat shock protein, mitochondrial OS=Homo sapiens OX=9606 GN=HSPD1 PE=1 SV=2	HSPD1	1	0.00410454	58.889	2	ISK(1)GANPVEIR	0.34875	5	1.25942	1.24925	0.671387	0.828168	0.991768		1.08453	1.00169	0.987637	1.03845	0.982884	0.90481	1.161	1.247	0.68	0.798	1.009		0.878	0.7202
P10809	417	K	60 kDa heat shock protein, mitochondrial OS=Homo sapiens OX=9606 GN=HSPD1 PE=1 SV=2	HSPD1	1	0.00529057	64.266	2	VGGTSDVEVNEK(1)K	-1.3334	1		1					1.08453	1.00169	0.987637	1.03845	0.982884	0.90481		0.998
P11021	163	K	Endoplasmic reticulum chaperone BiP OS=Homo sapiens OX=9606 GN=HSPA5 PE=1 SV=2	HSPA5	1	0.0187868	54.436	2	ETAEAYLGK(1)K	1.136	1	1						1.11874	0.862238	0.921186	1.13115	0.959041	1.00765	0.894
P11021	164	K	Endoplasmic reticulum chaperone BiP OS=Homo sapiens OX=9606 GN=HSPA5 PE=1 SV=2	HSPA5	1	0.0046149	42.495	3	K(1)VTHAVVTVPAYFNDAQR	0.81257	1	1						1.11874	0.862238	0.921186	1.13115	0.959041	1.00765	0.894
P11021	523	K	Endoplasmic reticulum chaperone BiP OS=Homo sapiens OX=9606 GN=HSPA5 PE=1 SV=2	HSPA5	1	0.00410465	61.48	2	NK(1)ITITNDQNR	-1.3224	3	1.49284	0.426305		1.08085			1.11874	0.862238	0.921186	1.13115	0.959041	1.00765	1.334	0.494		0.956			1.046
P11142	601	K	Heat shock cognate 71 kDa protein OS=Homo sapiens OX=9606 GN=HSPA8 PE=1 SV=1	HSPA8	1	0.0381082	47.361	2	ELEK(1)VCNPIITK	-1.6593	1	1						0.865971	1.03927	1.11764	0.815665	1.04236	1.11909	1.155
P11142	319	K	Heat shock cognate 71 kDa protein OS=Homo sapiens OX=9606 GN=HSPA8 PE=1 SV=1	HSPA8	1	0.00658285	57.888	2	GTLDPVEK(1)ALR	2.4796	2		1.20481				0.795193	0.865971	1.03927	1.11764	0.815665	1.04236	1.11909		1.159				0.711	0.613
P11142	187	K	Heat shock cognate 71 kDa protein OS=Homo sapiens OX=9606 GN=HSPA8 PE=1 SV=1	HSPA8	1	0.000298973	61.23	2	IINEPTAAAIAYGLDK(1)K	-0.51222	1		1					0.865971	1.03927	1.11764	0.815665	1.04236	1.11909		0.962
P11142	328	K	Heat shock cognate 71 kDa protein OS=Homo sapiens OX=9606 GN=HSPA8 PE=1 SV=1	HSPA8	1	4.8309e-05	58.794	3	LDK(1)SQIHDIVLVGGSTR	1.2033	2		1.40755			0.592452		0.865971	1.03927	1.11764	0.815665	1.04236	1.11909		1.354			0.568		0.419
P11142	597	K	Heat shock cognate 71 kDa protein OS=Homo sapiens OX=9606 GN=HSPA8 PE=1 SV=1	HSPA8	1	1.00319e-10	123.92	3	NQTAEKEEFEHQQK(1)ELEK	-0.51166	3	1.68191	0.501537		0.816554			0.865971	1.03927	1.11764	0.815665	1.04236	1.11909	1.942	0.483		1.001			0.826
P11142	71	K	Heat shock cognate 71 kDa protein OS=Homo sapiens OX=9606 GN=HSPA8 PE=1 SV=1	HSPA8	1	7.61154e-18	137.58	2	NQVAMNPTNTVFDAK(1)R	-0.033307	5	1.50546	1.49814	0.677535		0.879041	0.439829	0.865971	1.03927	1.11764	0.815665	1.04236	1.11909	1.738	1.442	0.606		0.843	0.393	0.49	0.265408
P11142	159	K	Heat shock cognate 71 kDa protein OS=Homo sapiens OX=9606 GN=HSPA8 PE=1 SV=1	HSPA8	1	0.0138858	46.068	2	QATK(1)DAGTIAGLNVLR	-1.217	1				1			0.865971	1.03927	1.11764	0.815665	1.04236	1.11909				1.226
P11142	108	K	Heat shock cognate 71 kDa protein OS=Homo sapiens OX=9606 GN=HSPA8 PE=1 SV=1	HSPA8	1	0.0210275	57.888	2	VQVEYK(1)GETK	-0.85678	3		1.29743			0.79817	0.904397	0.865971	1.03927	1.11764	0.815665	1.04236	1.11909		1.248			0.766	0.808	0.631
P11216	3	K	Glycogen phosphorylase, brain form OS=Homo sapiens OX=9606 GN=PYGB PE=1 SV=5	PYGB	1	0.0157389	42.075	2	AK(1)PLTDSEK	-0.22375	2				0.575125	1.42488		0.962843	1.04129	0.901828	1.39791	0.932455	0.763674				0.411	1.528
P11216	10	K	Glycogen phosphorylase, brain form OS=Homo sapiens OX=9606 GN=PYGB PE=1 SV=5	PYGB	1	0.0541664	58.286	2	PLTDSEK(1)R	0.1818	1				1			0.962843	1.04129	0.901828	1.39791	0.932455	0.763674				0.715
P11234	7	K	Ras-related protein Ral-B OS=Homo sapiens OX=9606 GN=RALB PE=1 SV=1	RALB	1	0.00976554	51.531	2	SK(1)GQSSLALHK	0.54736	2		0.816616		1.18338			1.02826	0.993607	1.0098	1.05502	0.944846	0.968474		0.822		1.122			1.365
P11387	150	K	DNA topoisomerase 1 OS=Homo sapiens OX=9606 GN=TOP1 PE=1 SV=2	TOP1	0.999821	9.07582e-22	212.4	2	DEDDADYKPK(1)K	1.2534	6	0.850465	0.990349	0.90493	1.26742	1.01168	0.975149	1.03105	0.987901	1.03826	1.00618	0.95929	0.977311	0.825	1.002	0.872	1.26	1.055	0.998	1.227	0.0892198
P11387	164	K	DNA topoisomerase 1 OS=Homo sapiens OX=9606 GN=TOP1 PE=1 SV=2	TOP1	1	0.000241391	115.41	2	K(1)LEEEEDGK	1.1568	11	1.06374	0.937732	0.922259	1.28588	0.935374	0.855012	1.03105	0.987901	1.03826	1.00618	0.95929	0.977311	1.032	0.949	0.888	1.278	0.975	0.875	1.09	0.566416
P11387	172	K	DNA topoisomerase 1 OS=Homo sapiens OX=9606 GN=TOP1 PE=1 SV=2	TOP1	1	0.000421378	101.45	2	KLEEEEDGK(1)LK	0.34398	5		1.13037	0.945733	1.15668	0.86196	0.905252	1.03105	0.987901	1.03826	1.00618	0.95929	0.977311		1.144	0.911	1.15	0.899	0.926	0.965	0.80609
P11388	1484	K	DNA topoisomerase 2-alpha OS=Homo sapiens OX=9606 GN=TOP2A PE=1 SV=3	TOP2A	1	0.0263975	44.82	2	IVSK(1)AVTSK	-1.6391	1						1	0.457451	1.384	1.23243	0.35799	1.35113	1.217						0.822
P11388	1276	K	DNA topoisomerase 2-alpha OS=Homo sapiens OX=9606 GN=TOP2A PE=1 SV=3	TOP2A	1	0.000590224	103.87	2	K(1)QTTLAFKPIK	-0.34238	2					1.15356	0.846443	0.457451	1.384	1.23243	0.35799	1.35113	1.217					0.854	0.696
P11388	1286	K	DNA topoisomerase 2-alpha OS=Homo sapiens OX=9606 GN=TOP2A PE=1 SV=3	TOP2A	0.998515	0.00199028	102.55	2	QTTLAFK(0.001)PIK(0.999)K	0.79071	1		1					0.457451	1.384	1.23243	0.35799	1.35113	1.217		0.723
P11586	543	K	C-1-tetrahydrofolate synthase, cytoplasmic OS=Homo sapiens OX=9606 GN=MTHFD1 PE=1 SV=4	MTHFD1	1	0.00348937	57.293	2	K(1)ITIGQAPTEK	-0.72208	1				1			1.00077	0.981151	1.01214	1.04225	0.960297	1.00339				0.959
P11940	512	K	Polyadenylate-binding protein 1 OS=Homo sapiens OX=9606 GN=PABPC1 PE=1 SV=2	PABPC1	1	0.000927647	67.881	2	TVPQYK(1)YAAGVR	-0.77344	7	1.32897	1.02909	1.00708	1.22908	0.25669	1.1491	0.939289	1.00758	1.03828	0.923393	1.05076	1.0407	1.415	1.021	0.97	1.331	0.244	1.104	0.787	0.455083
P12004	80	K	Proliferating cell nuclear antigen OS=Homo sapiens OX=9606 GN=PCNA PE=1 SV=1	PCNA	1	0.000472882	58.338	2	ILK(1)CAGNEDIITLR	-0.69562	1				1			0.690789	1.15097	1.15471	0.693311	1.14509	1.16513				1.442
P12268	511	K	Inosine-5'-monophosphate dehydrogenase 2 OS=Homo sapiens OX=9606 GN=IMPDH2 PE=1 SV=2	IMPDH2	1	3.82692e-11	88.421	3	TSSAQVEGGVHSLHSYEK(1)R	1.278	6	1.97637	0.831895	0.581919	1.46128	0.523491	0.625048	1.05269	0.972501	1.02575	1.04036	0.946726	0.96198	1.877	0.855	0.567	1.405	0.553	0.65	0.791	0.687806
P12270	364	K	Nucleoprotein TPR OS=Homo sapiens OX=9606 GN=TPR PE=1 SV=3	TPR	1	0.000669328	71.219	2	ELENANDLLSATK(1)R	0.058095	1				1			1.05843	0.931775	0.950343	1.08239	0.96335	1.01371				0.924
P12270	1648	K	Nucleoprotein TPR OS=Homo sapiens OX=9606 GN=TPR PE=1 SV=3	TPR	1	3.79523e-18	186.27	2	QITLK(1)TTPASGER	0.1948	6	1.11272	1.04283	0.884074	1.10586	1.00439	0.850133	1.05843	0.931775	0.950343	1.08239	0.96335	1.01371	1.051	1.119	0.93	1.022	1.043	0.839	0.937	0.48891
P12270	1690	K	Nucleoprotein TPR OS=Homo sapiens OX=9606 GN=TPR PE=1 SV=3	TPR	1	6.03606e-06	97.594	2	VTAAAMAGNK(1)STPR	1.5355	4		1.05624	0.598464	1.59401	0.751281		1.05843	0.931775	0.950343	1.08239	0.96335	1.01371		1.134	0.63	1.473	0.78		1.277	0.638259
P12814	195	K	Alpha-actinin-1 OS=Homo sapiens OX=9606 GN=ACTN1 PE=1 SV=2	ACTN1	1	0.0013869	55.754	3	HRPELIDYGK(1)LR	2.3842	1	1						1.13746	0.976601	1.02275	0.934584	0.940703	0.987904	0.879
P12814	420	K	Alpha-actinin-1 OS=Homo sapiens OX=9606 GN=ACTN1 PE=1 SV=2	ACTN1	1	0.000372388	71.896	2	QK(1)DYETATLSEIK	-0.98832	2		1.23907		0.760926			1.13746	0.976601	1.02275	0.934584	0.940703	0.987904		1.269		0.814			0.641
P12956	591	K	X-ray repair cross-complementing protein 6 OS=Homo sapiens OX=9606 GN=XRCC6 PE=1 SV=2	XRCC6	1	0.00153729	79.809	2	AYGLK(1)SGLK	-0.16123	2		1.07986	0.920138				1.06307	0.982626	0.998853	1.09489	0.913242	0.947319		1.099	0.921
P12956	539	K	X-ray repair cross-complementing protein 6 OS=Homo sapiens OX=9606 GN=XRCC6 PE=1 SV=2	XRCC6	1	0.000435893	66.619	2	ELVYPPDYNPEGK(1)VTK	7.0028	4	0.378302	1.33228		1.28942			1.06307	0.982626	0.998853	1.09489	0.913242	0.947319	0.356	1.356		1.178			1.376
P12956	461	K	X-ray repair cross-complementing protein 6 OS=Homo sapiens OX=9606 GN=XRCC6 PE=1 SV=2	XRCC6	1	6.64652e-05	78.932	2	IMATPEQVGK(1)MK	0.9867	6	1.15201	1.13384	0.949685	1.11741	0.561112	1.08595	1.06307	0.982626	0.998853	1.09489	0.913242	0.947319	1.084	1.154	0.951	1.021	0.614	1.146	0.872	0.447851
P12956	556	K	X-ray repair cross-complementing protein 6 OS=Homo sapiens OX=9606 GN=XRCC6 PE=1 SV=2	XRCC6	1	0.0019864	94.791	2	RPK(1)VEYSEEELK	-0.58465	5		1.13096	0.907084	1.02079	0.746596	1.19456	1.06307	0.982626	0.998853	1.09489	0.913242	0.947319		1.151	0.908	0.932	0.818	1.261	0.975	0.86315
P12956	317	K	X-ray repair cross-complementing protein 6 OS=Homo sapiens OX=9606 GN=XRCC6 PE=1 SV=2	XRCC6	1	1.13055e-22	164.56	2	TFNTSTGGLLLPSDTK(1)R	0.56074	6	1.03052	1.09869	0.79838	1.19109	0.981789	0.899531	1.06307	0.982626	0.998853	1.09489	0.913242	0.947319	0.969	1.118	0.799	1.088	1.075	0.95	1.079	0.478325
P12956	570	K	X-ray repair cross-complementing protein 6 OS=Homo sapiens OX=9606 GN=XRCC6 PE=1 SV=2	XRCC6	1	0.000279129	113.46	2	THISK(1)GTLGK	-0.58578	6	1.07611	1.01824	0.892243	1.23345	0.895557	0.884397	1.06307	0.982626	0.998853	1.09489	0.913242	0.947319	1.012	1.036	0.893	1.127	0.981	0.934	1.034	0.676659
P13010	565	K	X-ray repair cross-complementing protein 5 OS=Homo sapiens OX=9606 GN=XRCC5 PE=1 SV=3	XRCC5	1	9.61045e-14	129.53	3	DQVTAQEIFQDNHEDGPTAK(1)K	0.72032	6	1.10422	1.12955	0.788653	1.49017	0.774847	0.712557	1.04925	0.98919	0.9877	1.07685	0.931395	0.965606	1.052	1.142	0.798	1.384	0.832	0.738	0.987	0.864613
P13010	545	K	X-ray repair cross-complementing protein 5 OS=Homo sapiens OX=9606 GN=XRCC5 PE=1 SV=3	XRCC5	0.920075	5.2301e-33	166.29	3	K(0.08)K(0.92)DQVTAQEIFQDNHEDGPTAK	0.3369	6	1.13301	0.980815	0.716017	1.39866	0.923882	0.847616	1.04925	0.98919	0.9877	1.07685	0.931395	0.965606	1.08	0.992	0.725	1.299	0.992	0.878	1.133	0.495942
P13010	568	K	X-ray repair cross-complementing protein 5 OS=Homo sapiens OX=9606 GN=XRCC5 PE=1 SV=3	XRCC5	1	6.83604e-28	120.29	3	LK(1)TEQGGAHFSVSSLAEGSVTSVGSVNPAENFR	1.6353	6	0.799028	1.33969	0.433847	2.20081	0.558188	0.66843	1.04925	0.98919	0.9877	1.07685	0.931395	0.965606	0.762	1.354	0.439	2.044	0.599	0.692	1.305	0.700938
P13639	571	K	Elongation factor 2 OS=Homo sapiens OX=9606 GN=EEF2 PE=1 SV=4	EEF2	1	1.28937e-09	139.78	2	DLEEDHACIPIK(1)K	0.30914	7	0.719231	1.32649	1.29736	0.799824	0.957516	0.899585	0.96245	1.02564	1.06462	0.872388	1.03085	1.04406	0.747	1.293	1.219	0.917	0.929	0.862	0.831	0.420394
P13639	572	K	Elongation factor 2 OS=Homo sapiens OX=9606 GN=EEF2 PE=1 SV=4	EEF2	1	0.000311782	99.855	2	K(1)SDPVVSYR	1.077	6	1.2155	1.25506	0.900002	0.641042	0.928344	1.06006	0.96245	1.02564	1.06462	0.872388	1.03085	1.04406	1.263	1.224	0.845	0.735	0.901	1.015	0.796	0.238016
P13639	445	K	Elongation factor 2 OS=Homo sapiens OX=9606 GN=EEF2 PE=1 SV=4	EEF2	1	0.00475339	65.933	2	EDLYLK(1)PIQR	0.20716	5	1.56394			1.13686		0.299205	0.96245	1.02564	1.06462	0.872388	1.03085	1.04406	1.625			1.303		0.287	0.489
P13639	333	K	Elongation factor 2 OS=Homo sapiens OX=9606 GN=EEF2 PE=1 SV=4	EEF2	0.985948	0.00601972	81.48	3	LDSEDK(0.001)DK(0.013)EGK(0.986)PLLK	0.19079	1	1						0.96245	1.02564	1.06462	0.872388	1.03085	1.04406	1.039
P13639	337	K	Elongation factor 2 OS=Homo sapiens OX=9606 GN=EEF2 PE=1 SV=4	EEF2	1	0.000952515	96.51	2	PLLK(1)AVMR	-0.36875	3	1.2819			0.718101			0.96245	1.02564	1.06462	0.872388	1.03085	1.04406	1.332			0.823			0.618
P13639	239	K	Elongation factor 2 OS=Homo sapiens OX=9606 GN=EEF2 PE=1 SV=4	EEF2	1	7.95329e-30	240.94	2	FAAK(1)GEGQLGPAER	0.049304	6	0.955757	1.07921	0.875159	0.983906	1.0596	1.04637	0.96245	1.02564	1.06462	0.872388	1.03085	1.04406	0.993	1.052	0.822	1.128	1.028	1.002	1.101	0.290038
P13639	275	K	Elongation factor 2 OS=Homo sapiens OX=9606 GN=EEF2 PE=1 SV=4	EEF2	1	9.03942e-05	124.81	2	FSK(1)SATSPEGK	-0.60452	6	1.36794	0.984261	0.85724	1.09706	0.833948	0.859547	0.96245	1.02564	1.06462	0.872388	1.03085	1.04406	1.421	0.96	0.805	1.258	0.809	0.823	0.907	0.704412
P13639	439	K	Elongation factor 2 OS=Homo sapiens OX=9606 GN=EEF2 PE=1 SV=4	EEF2	1	0.000156931	154.35	2	K(1)EDLYLKPIQR	-0.25782	6	1.07363	1.13838	0.830957	0.939583	1.06931	0.948137	0.96245	1.02564	1.06462	0.872388	1.03085	1.04406	1.116	1.11	0.781	1.077	1.037	0.908	1.005	0.909012
P13639	314	K	Elongation factor 2 OS=Homo sapiens OX=9606 GN=EEF2 PE=1 SV=4	EEF2	0.999952	0.00183237	75.474	2	KEETAK(1)LIEK	-1.3047	6	1.68086	0.934153	0.690727	1.24035	0.62801	0.825905	0.96245	1.02564	1.06462	0.872388	1.03085	1.04406	1.746	0.911	0.649	1.422	0.609	0.791	0.854	0.739578
P13639	322	K	Elongation factor 2 OS=Homo sapiens OX=9606 GN=EEF2 PE=1 SV=4	EEF2	1	5.10672e-05	97.175	2	LDIK(1)LDSEDKDK	0.97554	4	1.44933	0.891675	0.845717			0.813274	0.96245	1.02564	1.06462	0.872388	1.03085	1.04406	1.506	0.869	0.794			0.779	0.737
P13639	512	K	Elongation factor 2 OS=Homo sapiens OX=9606 GN=EEF2 PE=1 SV=4	EEF2	1	3.28344e-07	153.25	2	VAVEAK(1)NPADLPK	-0.064195	6	1.32785	1.00551	0.802252	1.1323	0.84225	0.88984	0.96245	1.02564	1.06462	0.872388	1.03085	1.04406	1.38	0.98	0.754	1.298	0.817	0.852	0.953	0.868816
P13639	426	K	Elongation factor 2 OS=Homo sapiens OX=9606 GN=EEF2 PE=1 SV=4	EEF2	1	5.48048e-07	123.42	2	VFSGLVSTGLK(1)VR	-0.70152	2				1.41903		0.58097	0.96245	1.02564	1.06462	0.872388	1.03085	1.04406				1.627		0.556
P13796	97	K	Plastin-2 OS=Homo sapiens OX=9606 GN=LCP1 PE=1 SV=6	LCP1	1	1.48572e-07	48.801	3	K(1)EGICAIGGTSEQSSVGTQHSYSEEEK	1.2128	1						1	1.27555	1.04471	1.12777	0.622349	0.98186	0.947757						1.055
P13797	100	K	Plastin-3 OS=Homo sapiens OX=9606 GN=PLS3 PE=1 SV=4	PLS3	1	3.32918e-25	101.67	3	K(1)EGICALGGTSELSSEGTQHSYSEEEK	1.2936	6	0.84257	1.10279	0.899839	1.21581	1.00795	0.931041	0.967191	1.0635	1.06884	0.891545	0.979866	1.02907	0.871	1.037	0.842	1.364	1.029	0.905	1.199	0.280902
P13861	318	K	cAMP-dependent protein kinase type II-alpha regulatory subunit OS=Homo sapiens OX=9606 GN=PRKAR2A PE=1 SV=2	PRKAR2A	1	6.74136e-17	196.38	2	SNK(1)DGGNQEVEIAR	-0.36092	6	1.17555	1.02176	0.783039	1.3251	0.82101	0.873548	1.19117	0.885239	0.973973	1.18012	0.827742	0.941754	0.987	1.154	0.804	1.123	0.992	0.928	1.033	0.750459
P14174	78	K	Macrophage migration inhibitory factor OS=Homo sapiens OX=9606 GN=MIF PE=1 SV=4	MIF	1	8.9955e-06	114.93	2	SYSK(1)LLCGLLAER	1.5402	3	0.846355			1.711	0.44264		0.944874	1.07235	0.932272	1.03126	1.0645	0.954736	0.896			1.659	0.416		1.158
P14324	123	K	Farnesyl pyrophosphate synthase OS=Homo sapiens OX=9606 GN=FDPS PE=1 SV=4	FDPS	1	3.33585e-07	112.93	2	EVLEYNAIGGK(1)YNR	-0.43575	1				1			1.10585	0.970383	1.03829	1.06739	0.900543	0.917546				0.937
P14618	433	K	Pyruvate kinase PKM OS=Homo sapiens OX=9606 GN=PKM PE=1 SV=4	PKM	1	3.53761e-07	106.11	2	CCSGAIIVLTK(1)SGR	-1.9139	1				1			0.921448	1.02305	1.04142	0.966829	0.972042	1.07522				1.034
P14618	66	K	Pyruvate kinase PKM OS=Homo sapiens OX=9606 GN=PKM PE=1 SV=4	PKM	1	0.00506366	61.48	2	EMIK(1)SGMNVAR	0.092759	1				1			0.921448	1.02305	1.04142	0.966829	0.972042	1.07522				1.034
P14618	135	K	Pyruvate kinase PKM OS=Homo sapiens OX=9606 GN=PKM PE=1 SV=4	PKM	1	6.27629e-07	170.85	2	GSGTAEVELK(1)K	0.068153	6	1.24261	1.22027	0.887459	0.901134	0.762349	0.986178	0.921448	1.02305	1.04142	0.966829	0.972042	1.07522	1.349	1.193	0.852	0.932	0.784	0.917	0.776	0.182105
P14618	270	K	Pyruvate kinase PKM OS=Homo sapiens OX=9606 GN=PKM PE=1 SV=4	PKM	1	6.55886e-05	117.21	2	IISK(1)IENHEGVR	0.18848	6	1.2194	1.41015	0.938314	0.584135	0.837415	1.01059	0.921448	1.02305	1.04142	0.966829	0.972042	1.07522	1.323	1.378	0.901	0.604	0.862	0.94	0.668	0.102634
P14618	186	K	Pyruvate kinase PKM OS=Homo sapiens OX=9606 GN=PKM PE=1 SV=4	PKM	1	0.000287961	62.705	2	IYVDDGLISLQVK(1)QK	0.55841	1		1					0.921448	1.02305	1.04142	0.966829	0.972042	1.07522		0.977
P14618	207	K	Pyruvate kinase PKM OS=Homo sapiens OX=9606 GN=PKM PE=1 SV=4	PKM	1	0.000311811	66.509	2	K(1)GVNLPGAAVDLPAVSEK	-0.74986	1				1			0.921448	1.02305	1.04142	0.966829	0.972042	1.07522				1.034
P14618	89	K	Pyruvate kinase PKM OS=Homo sapiens OX=9606 GN=PKM PE=1 SV=4	PKM	1	5.84036e-29	204.61	4	LNFSHGTHEYHAETIK(1)NVR	-0.06284	12	1.23787	1.14978	1.01868	1.00596	0.700855	0.886849	0.921448	1.02305	1.04142	0.966829	0.972042	1.07522	1.343	1.124	0.978	1.04	0.721	0.825	0.751	0.108825
P14618	166	K	Pyruvate kinase PKM OS=Homo sapiens OX=9606 GN=PKM PE=1 SV=4	PKM	1	0.000452134	92.445	2	NICK(1)VVEVGSK	-0.7313	4	1.18084		0.777903	1.23862		0.802634	0.921448	1.02305	1.04142	0.966829	0.972042	1.07522	1.282		0.747	1.281		0.746	0.999	0.998039
P14618	115	K	Pyruvate kinase PKM OS=Homo sapiens OX=9606 GN=PKM PE=1 SV=4	PKM	1	2.87952e-06	115.04	2	PVAVALDTK(1)GPEIR	-0.042593	8	1.24844	1.24854	0.857481	0.887372	0.783978	0.974188	0.921448	1.02305	1.04142	0.966829	0.972042	1.07522	1.355	1.22	0.823	0.918	0.807	0.906	0.774	0.208412
P14618	62	K	Pyruvate kinase PKM OS=Homo sapiens OX=9606 GN=PKM PE=1 SV=4	PKM	1	0.00734798	88.181	2	SVETLK(1)EMIK	-3.8411	3		1.07857		1.16204	0.759394		0.921448	1.02305	1.04142	0.966829	0.972042	1.07522		1.054		1.202	0.781		0.941
P14618	498	K	Pyruvate kinase PKM OS=Homo sapiens OX=9606 GN=PKM PE=1 SV=4	PKM	1	0.00451663	79.059	2	VNFAMNVGK(1)AR	-1.4751	4	1.45552	1.20318		0.828518	0.512774		0.921448	1.02305	1.04142	0.966829	0.972042	1.07522	1.58	1.176		0.857	0.528		0.503	0.130456
P14649	35	K	Myosin light chain 6B OS=Homo sapiens OX=9606 GN=MYL6B PE=1 SV=1	MYL6B	1	0.0263897	46.068	2	TK(1)AEPAVPQAPQK	-0.0046507	1				1			1.22885	0.994679	0.936254	1.28018	0.837819	0.722215				0.781
P14866	62	K	Heterogeneous nuclear ribonucleoprotein L OS=Homo sapiens OX=9606 GN=HNRNPL PE=1 SV=2	HNRNPL	1	1.60488e-63	256.34	3	LK(1)TDNAGDQHGGGGGGGGGAGAAGGGGGGENYDDPHK	1.5747	13	1.20389	0.719939	0.806656	1.60785	0.567339	1.09433	0.981682	0.951921	0.978256	1.06711	0.962412	1.05862	1.226	0.756	0.825	1.507	0.589	1.034	1.115	0.854347
P14866	302	K	Heterogeneous nuclear ribonucleoprotein L OS=Homo sapiens OX=9606 GN=HNRNPL PE=1 SV=2	HNRNPL	1	1.33867e-45	186.89	3	NDQDTWDYTNPNLSGQGDPGSNPNK(1)R	0.85337	6	1.59963	1.15483	0.439813	1.84794	0.443546	0.514243	0.981682	0.951921	0.978256	1.06711	0.962412	1.05862	1.629	1.213	0.45	1.732	0.461	0.486	0.814	0.659572
P15121	95	K	Aldo-keto reductase family 1 member B1 OS=Homo sapiens OX=9606 GN=AKR1B1 PE=1 SV=3	AKR1B1	1	0.000176949	87.942	2	GACQK(1)TLSDLK	0.3302	3	0.854461	1.45827	0.687271				0.860405	1.03222	0.896414	0.908878	1.07585	1.22623	0.993	1.413	0.767
P15121	243	K	Aldo-keto reductase family 1 member B1 OS=Homo sapiens OX=9606 GN=AKR1B1 PE=1 SV=3	AKR1B1	1	0.000353317	114.39	2	HNK(1)TTAQVLIR	0.06362	6	1.20971	1.55239	0.860424	0.164096	1.04437	1.16901	0.860405	1.03222	0.896414	0.908878	1.07585	1.22623	1.406	1.504	0.96	0.181	0.971	0.953	0.544	0.221052
P15121	86	K	Aldo-keto reductase family 1 member B1 OS=Homo sapiens OX=9606 GN=AKR1B1 PE=1 SV=3	AKR1B1	1	1.2085e-05	90.306	2	LWCTYHEK(1)GLVK	0.48608	5		1.58844	0.449626	0.791205	0.492388	1.67834	0.860405	1.03222	0.896414	0.908878	1.07585	1.22623		1.539	0.502	0.871	0.458	1.369	0.881	0.909085
P15121	263	K	Aldo-keto reductase family 1 member B1 OS=Homo sapiens OX=9606 GN=AKR1B1 PE=1 SV=3	AKR1B1	1	0.00086629	52.837	2	NLVVIPK(1)SVTPER	0.36387	4	1.04464			1.63897	0.760697	0.555693	0.860405	1.03222	0.896414	0.908878	1.07585	1.22623	1.214			1.803	0.707	0.453	0.814
P15121	308	K	Aldo-keto reductase family 1 member B1 OS=Homo sapiens OX=9606 GN=AKR1B1 PE=1 SV=3	AKR1B1	1	1.12779e-05	110.91	3	VCALLSCTSHK(1)DYPFHEEF	-0.21043	5	0.747237	1.83734	0.795205	0.931622		0.688596	0.860405	1.03222	0.896414	0.908878	1.07585	1.22623	0.868	1.78	0.887	1.025		0.562	0.673	0.387915
P15121	179	K	Aldo-keto reductase family 1 member B1 OS=Homo sapiens OX=9606 GN=AKR1B1 PE=1 SV=3	AKR1B1	1	1.12936e-10	97.084	3	YK(1)PAVNQIECHPYLTQEK	0.72679	8	1.12152	1.58007	0.757462	0.72183	0.900842	0.918275	0.860405	1.03222	0.896414	0.908878	1.07585	1.22623	1.303	1.531	0.845	0.794	0.837	0.749	0.647	0.0871851
P15311	344	K	Ezrin OS=Homo sapiens OX=9606 GN=EZR PE=1 SV=4	EZR	1	0.0398514	53.878	2	EK(1)EELMLR	0.79686	1	1						1.01747	1.03686	1.01099	1.02721	0.976329	0.931137	0.983
P26038	262	K	Moesin OS=Homo sapiens OX=9606 GN=MSN PE=1 SV=3	MSN	0.999995	0.0266507	81.163	2	FVIKPIDK(1)K	0.22846	5	1.9118	1.0941	0.599428		0.693985	0.700685	1.12076	0.962228	1.01862	0.987	0.893554	1.01784	1.706	1.137	0.588		0.777	0.688	0.64	0.441228
P26038	263	K	Moesin OS=Homo sapiens OX=9606 GN=MSN PE=1 SV=3	MSN	1	0.00348937	64.906	2	K(1)APDFVFYAPR	0.64479	5	1.37612		0.505055	1.50558		0.613239	1.12076	0.962228	1.01862	0.987	0.893554	1.01784	1.228		0.496	1.525		0.602	1.234	0.781933
P15311	72	K	Ezrin OS=Homo sapiens OX=9606 GN=EZR PE=1 SV=4	EZR	1	0.00076327	109.36	2	K(1)ENPLQFK	-0.11515	3	0.987012	0.512758		1.50023			1.01747	1.03686	1.01099	1.02721	0.976329	0.931137	0.97	0.495		1.46			1.993
P26038	254	K	Moesin OS=Homo sapiens OX=9606 GN=MSN PE=1 SV=3	MSN	1	0.00104244	115.86	2	K(1)FVIKPIDK	-0.1761	2			0.916274		1.08373		1.12076	0.962228	1.01862	0.987	0.893554	1.01784			0.9		1.213		1.348
P15311	3	K	Ezrin OS=Homo sapiens OX=9606 GN=EZR PE=1 SV=4	EZR	1	0.012015	75.915	2	PK(1)PINVR	0.55345	2	0.876127			1.12387			1.01747	1.03686	1.01099	1.02721	0.976329	0.931137	0.861			1.094			1.271
P15311	438	K	Ezrin OS=Homo sapiens OX=9606 GN=EZR PE=1 SV=4	EZR	1	2.89091e-05	96.946	3	RK(1)EDEVEEWQHR	-1.1242	3	1.30186	1.03159			0.666552		1.01747	1.03686	1.01099	1.02721	0.976329	0.931137	1.28	0.995			0.683		0.6
P22392	26	K	Nucleoside diphosphate kinase B OS=Homo sapiens OX=9606 GN=NME2 PE=1 SV=1	NME2	1	0.00109752	75.243	2	GLVGEIIK(1)R	-4.8573	2		1.26753	0.732474
P22392	100	K	Nucleoside diphosphate kinase B OS=Homo sapiens OX=9606 GN=NME2 PE=1 SV=1	NME2	1	6.68125e-06	79.235	2	VMLGETNPADSK(1)PGTIR	-1.7238	3		1.74098	0.554879			0.704141
P15880	275	K	40S ribosomal protein S2 OS=Homo sapiens OX=9606 GN=RPS2 PE=1 SV=2	RPS2	1	1.18785e-08	105.08	3	SPYQEFTDHLVK(1)THTR	0.96646	5	1.29668	0.942976		1.13544	0.739641	0.885267	1.01504	0.947437	1.07747	0.986507	0.957756	1.0158	1.277	0.995		1.151	0.772	0.872	0.82	0.334888
P15923	171	K	Transcription factor E2-alpha OS=Homo sapiens OX=9606 GN=TCF3 PE=1 SV=1	TCF3	1	0.000202573	79.311	2	AADGSLDTQPK(1)K	-1.3284	3		0.849013			0.966146	1.18484
P15924	2026	K	Desmoplakin OS=Homo sapiens OX=9606 GN=DSP PE=1 SV=3	DSP	1	9.949e-06	112.7	2	GAGSIAGASASPK(1)EK	1.7876	3		0.337969		2.10793	0.554102		0.991199	0.958729	0.969487	1.02221	0.999463	1.05891		0.353		2.062	0.554		3.705
P15924	2592	K	Desmoplakin OS=Homo sapiens OX=9606 GN=DSP PE=1 SV=3	DSP	1	2.60508e-07	106.47	2	HESVSK(1)ISTISSVR	-0.35562	6	1.47572	1.03962	0.607741	1.37557	0.754177	0.747165	0.991199	0.958729	0.969487	1.02221	0.999463	1.05891	1.489	1.084	0.627	1.346	0.755	0.706	0.877	0.742194
P15924	2458	K	Desmoplakin OS=Homo sapiens OX=9606 GN=DSP PE=1 SV=3	DSP	1	9.5519e-05	117.3	2	QVQTSQK(1)NTLR	-1.7772	5	1.61992	0.850148		1.5323	0.61262	0.385017	0.991199	0.958729	0.969487	1.02221	0.999463	1.05891	1.634	0.887		1.499	0.613	0.364	0.655	0.412555
P16104	128	K	Histone H2AX OS=Homo sapiens OX=9606 GN=H2AX PE=1 SV=2	H2AX	1	1.89109e-10	150.44	2	TSATVGPK(1)APSGGK	-0.88278	6	0.986323	1.09692	0.843514	1.31731	0.939141	0.816793
P16220	122	K	Cyclic AMP-responsive element-binding protein 1 OS=Homo sapiens OX=9606 GN=CREB1 PE=1 SV=3	CREB1	1	5.59631e-30	234.58	2	K(1)ILNDLSSDAPGVPR	0.13429	6	0.936646	1.03234	0.845276	1.18355	1.00569	0.996494
P16401	67	K	Histone H1.5 OS=Homo sapiens OX=9606 GN=H1-5 PE=1 SV=3	H1-5	1	0.000544395	70.195	2	K(1)ALAAGGYDVEK	2.5913	6	1.33181	0.936173	1.28029	1.08349	0.833181	0.535058	0.953674	0.804899	1.04079	1.30374	0.838417	1.05848	1.397	1.163	1.23	0.831	0.994	0.505	0.615	0.0674751
P16401	37	K	Histone H1.5 OS=Homo sapiens OX=9606 GN=H1-5 PE=1 SV=3	H1-5	1	5.8176e-05	108.5	2	K(1)ATGPPVSELITK	-0.27387	2				1.39183	0.608172		0.953674	0.804899	1.04079	1.30374	0.838417	1.05848				1.068	0.725
P16401	17	K	Histone H1.5 OS=Homo sapiens OX=9606 GN=H1-5 PE=1 SV=3	H1-5	1	2.04279e-05	51.07	2	SETAPAETATPAPVEK(1)SPAK	-0.99914	1	1						0.953674	0.804899	1.04079	1.30374	0.838417	1.05848	1.049
P16949	119	K	Stathmin OS=Homo sapiens OX=9606 GN=STMN1 PE=1 SV=3	STMN1	1	4.11397e-05	127.03	2	EAQMAAK(1)LERLR	-0.76564	7	0.942221	1.17821	0.93878		1.02585	0.914938	1.00426	0.85781	1.04693	1.0282	0.851533	1.21126	0.938	1.374	0.897		1.205	0.755	0.916	0.724203
P16949	43	K	Stathmin OS=Homo sapiens OX=9606 GN=STMN1 PE=1 SV=3	STMN1	0.942876	0.0213441	71.066	2	K(0.057)K(0.943)DLSLEEIQK	0.64957	1			1				1.00426	0.85781	1.04693	1.0282	0.851533	1.21126			0.955
P17096	31	K	High mobility group protein HMG-I/HMG-Y OS=Homo sapiens OX=9606 GN=HMGA1 PE=1 SV=3	HMGA1	1	1.6928e-08	135.5	2	K(1)QPPVSPGTALVGSQK	-0.7999	6	1.49482	0.844448	0.783902	1.62972	0.584501	0.662607
P17096	7	K	High mobility group protein HMG-I/HMG-Y OS=Homo sapiens OX=9606 GN=HMGA1 PE=1 SV=3	HMGA1	1	7.38231e-39	260.76	2	SESSSK(1)SSQPLASK	1.0988	6	1.61345	1.05203	0.811312	1.14224	0.716811	0.664156
P17096	15	K	High mobility group protein HMG-I/HMG-Y OS=Homo sapiens OX=9606 GN=HMGA1 PE=1 SV=3	HMGA1	1	0.00976554	47.334	2	SSQPLASK(1)QEK	-2.0801	1			1
P17706	364	K	Tyrosine-protein phosphatase non-receptor type 2 OS=Homo sapiens OX=9606 GN=PTPN2 PE=1 SV=2	PTPN2	1	3.40745e-07	158.57	2	ATTAQK(1)VQQMK	-0.062269	6	0.614234	1.23705	0.95788	0.858162	1.11158	1.2211
P17844	523	K	Probable ATP-dependent RNA helicase DDX5 OS=Homo sapiens OX=9606 GN=DDX5 PE=1 SV=1	DDX5	1	0.00817705	96.51	2	GYSSLLK(1)R	-0.22945	6	0.466252	1.41249	1.15656	0.474234	1.16099	1.32948	0.652318	1.22149	1.21233	0.627633	1.13918	1.14705	0.715	1.156	0.954	0.756	1.019	1.159	1.039	0.836774
P17844	33	K	Probable ATP-dependent RNA helicase DDX5 OS=Homo sapiens OX=9606 GN=DDX5 PE=1 SV=1	DDX5	1	5.28049e-05	133.68	2	K(1)FGNPGEK	0.18523	6	0.551757	1.18891	1.15861	0.816854	1.11208	1.1718	0.652318	1.22149	1.21233	0.627633	1.13918	1.14705	0.846	0.973	0.956	1.301	0.976	1.022	1.189	0.168731
P17844	45	K	Probable ATP-dependent RNA helicase DDX5 OS=Homo sapiens OX=9606 GN=DDX5 PE=1 SV=1	DDX5	1	0.000562445	85.716	2	K(1)WNLDELPK	0.1125	13		1.38293	0.390979	1.00425	1.02867	1.19318	0.652318	1.22149	1.21233	0.627633	1.13918	1.14705		1.132	0.323	1.6	0.903	1.04	1.623	0.304907
P17858	677	K	ATP-dependent 6-phosphofructokinase, liver type OS=Homo sapiens OX=9606 GN=PFKL PE=1 SV=6	PFKL	1	0.00225019	94.806	2	NYGTK(1)LGVK	-0.1663	6	0.630723	1.23133	1.09961	1.01124	1.24039	0.786711	0.937792	0.948573	0.851757	1.16288	1.06523	1.03378	0.673	1.298	1.291	0.87	1.164	0.761	0.857	0.640421
P17987	400	K	T-complex protein 1 subunit alpha OS=Homo sapiens OX=9606 GN=TCP1 PE=1 SV=1	TCP1	1	0.00255242	58.916	2	SLHDALCVVK(1)R	1.0704	1				1			1.01412	0.933637	1.02764	1.02015	0.978472	1.02598				0.98
P18124	77	K	60S ribosomal protein L7 OS=Homo sapiens OX=9606 GN=RPL7 PE=1 SV=1	RPL7	1	9.79694e-06	115.41	2	K(1)AGNFYVPAEPK	-0.3289	7	1.612	0.462967	0.580394	1.58195	0.641123	1.12157	1.07678	0.842705	0.981307	1.11799	0.957115	1.0241	1.497	0.549	0.591	1.415	0.67	1.095	1.206	0.551865
P18124	9	K	60S ribosomal protein L7 OS=Homo sapiens OX=9606 GN=RPL7 PE=1 SV=1	RPL7	0.922532	4.0038e-05	119.94	2	K(0.077)K(0.923)EVPAVPETLK	-0.29272	6	1.1203	1.10697		0.987664	0.98282	0.802252	1.07678	0.842705	0.981307	1.11799	0.957115	1.0241	1.04	1.314		0.883	1.027	0.783	0.763	0.136329
P18206	219	K	Vinculin OS=Homo sapiens OX=9606 GN=VCL PE=1 SV=4	VCL	1	1.15515e-05	144.27	2	NSK(1)NQGIEEALK	0.74247	6	1.063	1.10892	0.74665	1.15336	0.997808	0.930255	1.01875	1.00482	1.06009	0.939033	0.956202	1.02111	1.043	1.104	0.704	1.228	1.044	0.911	1.116	0.503337
P18615	130	K	Negative elongation factor E OS=Homo sapiens OX=9606 GN=NELFE PE=1 SV=3	NELFE	1	8.18005e-07	102.03	2	K(1)SLYESFVSSSDR	0.012176	3				0.851358	0.865059	1.28358	1.05104	0.831368	1.08826	0.960857	0.914558	1.15392				0.886	0.946	1.112
P18615	95	K	Negative elongation factor E OS=Homo sapiens OX=9606 GN=NELFE PE=1 SV=3	NELFE	0.999998	0.000351611	144.27	2	TLEGK(1)LKDPEK	-0.39282	5	0.826325	1.07458	1.00017	0.987327		1.1116	1.05104	0.831368	1.08826	0.960857	0.914558	1.15392	0.786	1.293	0.919	1.028		0.963	0.996	0.932017
P18621	49	K	60S ribosomal protein L17 OS=Homo sapiens OX=9606 GN=RPL17 PE=1 SV=3	RPL17	1	0.000836153	102.46	2	YLK(1)DVTLQK	-0.85396	4	1.47023			1.00832	0.654265	0.867181	1.03169	0.962472	0.981548	1.06737	0.991526	0.965399	1.425			0.945	0.66	0.898	0.585
P18669	251	K	Phosphoglycerate mutase 1 OS=Homo sapiens OX=9606 GN=PGAM1 PE=1 SV=2	PGAM1	1	3.34592e-05	112.8	2	AMEAVAAQGK(1)AK	-0.032963	6	0.39288	1.66879	0.106812	1.49081	1.35262	0.988093	0.874862	1.07428	1.00921	0.995859	1.04687	0.998919	0.449	1.553	0.106	1.497	1.292	0.989	1.792	0.239332
P18669	113	K	Phosphoglycerate mutase 1 OS=Homo sapiens OX=9606 GN=PGAM1 PE=1 SV=2	PGAM1	1	0.0523804	53.517	2	HGEAQVK(1)IWR	-1.5788	1					1		0.874862	1.07428	1.00921	0.995859	1.04687	0.998919					0.955
P18669	100	K	Phosphoglycerate mutase 1 OS=Homo sapiens OX=9606 GN=PGAM1 PE=1 SV=2	PGAM1	1	6.33846e-45	234.58	2	HYGGLTGLNK(1)AETAAK	-0.81839	13	1.2518	1.1594	0.569052	1.7059	0.711158	0.602685	0.874862	1.07428	1.00921	0.995859	1.04687	0.998919	1.431	1.079	0.564	1.713	0.679	0.603	0.974	0.874896
P18846	69	K	Cyclic AMP-dependent transcription factor ATF-1 OS=Homo sapiens OX=9606 GN=ATF1 PE=1 SV=2	ATF1	1	0.000128552	99.174	2	ILK(1)DLSSEDTR	0.38558	6	0.767338	0.993061	1.00001	1.04342	1.03451	1.16165
P18887	243	K	DNA repair protein XRCC1 OS=Homo sapiens OX=9606 GN=XRCC1 PE=1 SV=2	XRCC1	0.996103	0.00187611	51.454	3	AIGSTSK(0.004)PQESPK(0.996)GK	0.12973	1			1				1.02872	0.984814	0.996886	1.12231	0.856493	1.01078			1.003
P18887	247	K	DNA repair protein XRCC1 OS=Homo sapiens OX=9606 GN=XRCC1 PE=1 SV=2	XRCC1	1	3.28046e-06	187.23	2	K(1)LDLNQEEK	0.42846	6	1.01508	1.02765	0.918992	1.32662	0.763408	0.948249	1.02872	0.984814	0.996886	1.12231	0.856493	1.01078	0.987	1.043	0.922	1.182	0.891	0.938	1.02	0.894038
P18887	271	K	DNA repair protein XRCC1 OS=Homo sapiens OX=9606 GN=XRCC1 PE=1 SV=2	XRCC1	1	4.08636e-08	127.07	4	KTPSKPPAQLSPSVPK(1)RPK	0.70725	14	1.23104	0.947949	1.11205	1.20815	0.713042	0.787766	1.02872	0.984814	0.996886	1.12231	0.856493	1.01078	1.197	0.963	1.116	1.076	0.833	0.779	0.821	0.157889
P18887	431	K	DNA repair protein XRCC1 OS=Homo sapiens OX=9606 GN=XRCC1 PE=1 SV=2	XRCC1	1	0.000338433	103.8	2	LPQK(1)QPQTK	0.62778	6	0.790055	1.03779	0.936198	1.42612	0.877605	0.932238	1.02872	0.984814	0.996886	1.12231	0.856493	1.01078	0.768	1.054	0.939	1.271	1.025	0.922	1.166	0.312775
P18887	169	K	DNA repair protein XRCC1 OS=Homo sapiens OX=9606 GN=XRCC1 PE=1 SV=2	XRCC1	1	6.23081e-10	192.6	2	VTVTK(1)LGQFR	0.19005	6	1.14971	0.919195	0.94335	1.27895	0.817497	0.891302	1.02872	0.984814	0.996886	1.12231	0.856493	1.01078	1.118	0.933	0.946	1.14	0.954	0.882	0.993	0.926138
P19338	95	K	Nucleolin OS=Homo sapiens OX=9606 GN=NCL PE=1 SV=3	NCL	0.970977	0.00195901	93.162	2	AAATPAK(0.971)K(0.029)TVTPAK	-1.1775	3	0.798773	1.11788			1.08335		1.03437	0.997969	1.0265	0.987739	0.987174	0.96625	0.772	1.12			1.097		1.16
P19338	96	K	Nucleolin OS=Homo sapiens OX=9606 GN=NCL PE=1 SV=3	NCL	0.836663	0.00261526	65.408	2	AAATPAK(0.163)K(0.837)TVTPAK	-0.089144	1						1	1.03437	0.997969	1.0265	0.987739	0.987174	0.96625						1.035
P19338	102	K	Nucleolin OS=Homo sapiens OX=9606 GN=NCL PE=1 SV=3	NCL	1	1.77375e-10	176.45	2	TVTPAK(1)AVTTPGK	0.94646	20	0.897162	1.01147	0.821521	1.30157	1.06361	0.904671	1.03437	0.997969	1.0265	0.987739	0.987174	0.96625	0.867	1.014	0.8	1.318	1.077	0.936	1.242	0.155341
P19338	62	K	Nucleolin OS=Homo sapiens OX=9606 GN=NCL PE=1 SV=3	NCL	0.998373	1.97364e-16	158.59	2	AAATSAK(0.998)K(0.002)VVVSPTK	0.87355	6	1.13496	0.733117	1.02806	0.699347	1.04245	1.36206	1.03437	0.997969	1.0265	0.987739	0.987174	0.96625	1.097	0.735	1.002	0.708	1.056	1.41	1.12	0.723534
P19338	63	K	Nucleolin OS=Homo sapiens OX=9606 GN=NCL PE=1 SV=3	NCL	1	0.000238896	118.06	2	K(1)VVVSPTK	-1.3357	2			0.531614	1.46839			1.03437	0.997969	1.0265	0.987739	0.987174	0.96625			0.518	1.487			2.871
P19338	70	K	Nucleolin OS=Homo sapiens OX=9606 GN=NCL PE=1 SV=3	NCL	1	0.00449571	115.35	2	VVVSPTK(1)K	-0.42772	9	1.05595	0.831228	0.670473	1.77033	0.904258	0.767762	1.03437	0.997969	1.0265	0.987739	0.987174	0.96625	1.021	0.833	0.653	1.792	0.916	0.795	1.397	0.369709
P19338	223	K	Nucleolin OS=Homo sapiens OX=9606 GN=NCL PE=1 SV=3	NCL	1	0.0290227	49.325	2	AAK(1)VVPVK	0.32134	8	1.17799	1.09991	0.857201		0.961207	0.903693	1.03437	0.997969	1.0265	0.987739	0.987174	0.96625	1.139	1.102	0.835		0.974	0.935	0.931	0.65919
P19338	124	K	Nucleolin OS=Homo sapiens OX=9606 GN=NCL PE=1 SV=3	NCL	1	0.0011942	79.809	2	ALVATPGK(1)K	0.56165	6	1.04234	1.04583	0.776566	1.26811	1.01508	0.852069	1.03437	0.997969	1.0265	0.987739	0.987174	0.96625	1.008	1.048	0.757	1.284	1.028	0.882	1.135	0.449985
P19338	125	K	Nucleolin OS=Homo sapiens OX=9606 GN=NCL PE=1 SV=3	NCL	1	0.00278046	75.243	2	K(1)GAAIPAK	0.33835	6	0.40413	1.16824	0.836138	1.39174	1.30532	0.89444	1.03437	0.997969	1.0265	0.987739	0.987174	0.96625	0.391	1.171	0.815	1.409	1.322	0.926	1.538	0.216531
P19338	109	K	Nucleolin OS=Homo sapiens OX=9606 GN=NCL PE=1 SV=3	NCL	0.973441	0.00214572	77.358	2	AVTTPGK(0.973)K(0.027)GATPGK	-0.78355	4	0.63894	0.992114	1.20939		1.15955		1.03437	0.997969	1.0265	0.987739	0.987174	0.96625	0.618	0.994	1.178		1.175		1.263
P19338	116	K	Nucleolin OS=Homo sapiens OX=9606 GN=NCL PE=1 SV=3	NCL	1	8.69988e-17	220.81	2	GATPGK(1)ALVATPGK	-0.20278	19	0.922285	0.980397	0.856484	1.22095	1.07958	0.940301	1.03437	0.997969	1.0265	0.987739	0.987174	0.96625	0.892	0.982	0.834	1.236	1.094	0.973	1.22	0.0792938
P19338	610	K	Nucleolin OS=Homo sapiens OX=9606 GN=NCL PE=1 SV=3	NCL	1	0.00022625	55.354	2	ETGSSK(1)GFGFVDFNSEEDAK	-0.74118	1				1			1.03437	0.997969	1.0265	0.987739	0.987174	0.96625				1.012
P19338	477	K	Nucleolin OS=Homo sapiens OX=9606 GN=NCL PE=1 SV=3	NCL	1	1.68048e-13	183.57	2	GGK(1)NSTWSGESK	0.33528	6	0.936501	1.10399	0.902683	1.1428	0.967438	0.946588	1.03437	0.997969	1.0265	0.987739	0.987174	0.96625	0.905	1.106	0.879	1.157	0.98	0.98	1.079	0.440542
P19338	348	K	Nucleolin OS=Homo sapiens OX=9606 GN=NCL PE=1 SV=3	NCL	1	0.00265451	55.782	2	K(1)FGYVDFESAEDLEK	0.46346	1				1			1.03437	0.997969	1.0265	0.987739	0.987174	0.96625				1.012
P19338	71	K	Nucleolin OS=Homo sapiens OX=9606 GN=NCL PE=1 SV=3	NCL	1	0.000306046	111.39	2	K(1)VAVATPAK	-1.1171	6	0.94786	0.937908	0.809372	1.36764	1.07172	0.865501	1.03437	0.997969	1.0265	0.987739	0.987174	0.96625	0.916	0.94	0.788	1.385	1.086	0.896	1.273	0.171478
P19338	79	K	Nucleolin OS=Homo sapiens OX=9606 GN=NCL PE=1 SV=3	NCL	1	0.000360841	110.22	2	VAVATPAK(1)K	-2.39	6	1.04524	1.02977	0.749248	1.26827	1.05224	0.855229	1.03437	0.997969	1.0265	0.987739	0.987174	0.96625	1.011	1.032	0.73	1.284	1.066	0.885	1.167	0.375631
P19338	403	K	Nucleolin OS=Homo sapiens OX=9606 GN=NCL PE=1 SV=3	NCL	1	0.000871514	71.066	2	NLPYK(1)VTQDELK	-0.77641	3	1.7688	0.699165			0.532034		1.03437	0.997969	1.0265	0.987739	0.987174	0.96625	1.71	0.701			0.539		0.447
P19338	467	K	Nucleolin OS=Homo sapiens OX=9606 GN=NCL PE=1 SV=3	NCL	1	7.4718e-36	187.47	2	SISLYYTGEK(1)GQNQDYR	-0.38248	6	0.992004	0.960264	0.839637	1.66819	0.702716	0.83719	1.03437	0.997969	1.0265	0.987739	0.987174	0.96625	0.959	0.962	0.818	1.689	0.712	0.866	1.193	0.708074
P19338	429	K	Nucleolin OS=Homo sapiens OX=9606 GN=NCL PE=1 SV=3	NCL	1	0.000251763	104.39	2	SK(1)GIAYIEFK	0.14939	6	1.2601	1.07464	0.8174	1.39255	0.692167	0.763148	1.03437	0.997969	1.0265	0.987739	0.987174	0.96625	1.218	1.077	0.796	1.41	0.701	0.79	0.939	0.71822
P19338	577	K	Nucleolin OS=Homo sapiens OX=9606 GN=NCL PE=1 SV=3	NCL	1	1.76746e-08	110.9	2	TLFVK(1)GLSEDTTEETLK	0.15573	3			0.673242	1.43626		0.890495	1.03437	0.997969	1.0265	0.987739	0.987174	0.96625			0.656	1.454		0.922	1.811
P19338	398	K	Nucleolin OS=Homo sapiens OX=9606 GN=NCL PE=1 SV=3	NCL	1	0.00021629	133.98	2	TLLAK(1)NLPYK	-0.30518	6	1.12992	1.00784	0.975055	1.23468	0.888981	0.763531	1.03437	0.997969	1.0265	0.987739	0.987174	0.96625	1.092	1.01	0.95	1.25	0.901	0.79	0.964	0.721138
P19447	222	K	General transcription and DNA repair factor IIH helicase subunit XPB OS=Homo sapiens OX=9606 GN=ERCC3 PE=1 SV=1	ERCC3	1	5.63856e-23	188.19	2	SAISK(1)TAESSGGPSTSR	-0.056905	4	1.02552	1.00495		1.15577		0.813766	1.06255	1.06268	0.853461	1.13054	1.03186	0.858918	0.965	0.946		1.022		0.947	1.03	0.535402
P19544	381	K	Wilms tumor protein OS=Homo sapiens OX=9606 GN=WT1 PE=1 SV=2	WT1	1	0.07027	42.446	3	HTGVK(1)PFQCK(1)TCQRK(1)FSR	11.542	2			0.80315		1.19685
P19544	386	K	Wilms tumor protein OS=Homo sapiens OX=9606 GN=WT1 PE=1 SV=2	WT1	1	0.07027	42.446	3	HTGVK(1)PFQCK(1)TCQRK(1)FSR	11.542	2			0.80315		1.19685
P19544	391	K	Wilms tumor protein OS=Homo sapiens OX=9606 GN=WT1 PE=1 SV=2	WT1	1	0.07027	42.446	3	HTGVK(1)PFQCK(1)TCQRK(1)FSR	11.542	2			0.80315		1.19685
P20042	87	K	Eukaryotic translation initiation factor 2 subunit 2 OS=Homo sapiens OX=9606 GN=EIF2S2 PE=1 SV=2	EIF2S2	1	3.20442e-07	142.51	2	K(1)IFDIDEAEEGVK	-0.21162	6	1.19473	1.13222	0.855824	1.27674	0.855999	0.684485	1.10486	0.924328	1.01434	1.08988	0.91157	0.955015	1.081	1.225	0.844	1.171	0.939	0.717	0.897	0.551559
P20042	324	K	Eukaryotic translation initiation factor 2 subunit 2 OS=Homo sapiens OX=9606 GN=EIF2S2 PE=1 SV=2	EIF2S2	1	2.24469e-06	196.32	2	TGFQAVTGK(1)R	0.10504	6	1.03546	1.16091	0.951805	1.12339	0.908258	0.820183	1.10486	0.924328	1.01434	1.08988	0.91157	0.955015	0.937	1.256	0.938	1.031	0.996	0.859	0.922	0.542354
P20248	54	K	Cyclin-A2 OS=Homo sapiens OX=9606 GN=CCNA2 PE=1 SV=2	CCNA2	1	9.90573e-06	97.277	2	AALAVLK(1)SGNPR	0.87313	4		1.08416	0.814701		1.15393	0.947207
P20290	57	K	Transcription factor BTF3 OS=Homo sapiens OX=9606 GN=BTF3 PE=1 SV=1	BTF3	1	0.000962931	93.561	2	LAK(1)LQAQVR	1.5594	5	0.914244		1.2152	0.994706	1.04021	0.835641	0.949987	1.07297	1.06888	0.759053	1.11685	1.03225	0.962		1.137	1.31	0.931	0.81	0.969	0.817873
P20749	21	K	B-cell lymphoma 3 protein OS=Homo sapiens OX=9606 GN=BCL3 PE=1 SV=2	BCL3	1	0.0111723	63.908	2	TRPK(1)AAGLPGAALPLR	-0.10633	1		1					0.84299	1.03816	0.930194	1.10591	0.978452	1.10429		0.963
P20810	261	K	Calpastatin OS=Homo sapiens OX=9606 GN=CAST PE=1 SV=4	CAST	1	4.87635e-12	153.52	2	EESTEVLK(1)AQSAGTVR	-1.0578	2		1.18357		0.816425			1.05031	0.943902	0.908854	1.26378	0.945867	0.887292		1.254		0.646			0.515
P20810	64	K	Calpastatin OS=Homo sapiens OX=9606 GN=CAST PE=1 SV=4	CAST	1	0.000193945	140.05	2	EHTEPK(1)SLPK	-0.5075	5	0.601642	1.18185	0.421591	2.06928	0.725642		1.05031	0.943902	0.908854	1.26378	0.945867	0.887292	0.573	1.252	0.464	1.637	0.767		1.575	0.391808
P20810	68	K	Calpastatin OS=Homo sapiens OX=9606 GN=CAST PE=1 SV=4	CAST	1	4.56901e-18	170.22	2	SLPK(1)QASDTGSNDAHNK	1.0683	5				1.33506	0.818499	0.846436	1.05031	0.943902	0.908854	1.26378	0.945867	0.887292				1.056	0.865	0.954
P20810	132	K	Calpastatin OS=Homo sapiens OX=9606 GN=CAST PE=1 SV=4	CAST	1	5.55787e-13	123.24	3	K(1)SLTPAVPVESKPDKPSGK	-0.41576	6	0.90612	1.04789	0.700864	1.51311	1.02397	0.808053	1.05031	0.943902	0.908854	1.26378	0.945867	0.887292	0.863	1.11	0.771	1.197	1.083	0.911	1.163	0.307894
P20810	283	K	Calpastatin OS=Homo sapiens OX=9606 GN=CAST PE=1 SV=4	CAST	0.791217	4.38217e-14	114.35	3	K(0.209)VEK(0.791)DTMSDQALEALSASLGTR	0.0017144	2		1.34354		0.656461			1.05031	0.943902	0.908854	1.26378	0.945867	0.887292		1.423		0.519			0.365
P20810	43	K	Calpastatin OS=Homo sapiens OX=9606 GN=CAST PE=1 SV=4	CAST	1	4.61054e-06	168.05	2	SQSTK(1)LSVVHEK	0.31687	7	0.906636	1.1442	0.902338	0.997547	1.13059	0.918684	1.05031	0.943902	0.908854	1.26378	0.945867	0.887292	0.863	1.212	0.993	0.789	1.195	1.035	0.984	0.900827
P21291	112	K	Cysteine and glycine-rich protein 1 OS=Homo sapiens OX=9606 GN=CSRP1 PE=1 SV=3	CSRP1	1	2.50337e-06	196.32	2	FAQK(1)IGGSER	0.011918	6	1.09975	1.06888	0.946181	1.09555	0.89654	0.893102	1.1342	0.995457	0.97418	0.969295	0.987225	0.93964	0.97	1.074	0.971	1.13	0.908	0.95	0.991	0.876633
P21291	108	K	Cysteine and glycine-rich protein 1 OS=Homo sapiens OX=9606 GN=CSRP1 PE=1 SV=3	CSRP1	1	1.0969e-24	181.9	2	PTTNPNASK(1)FAQK	-1.0572	23	0.840128	1.15422	0.764114	1.36747	0.940613	0.933457	1.1342	0.995457	0.97418	0.969295	0.987225	0.93964	0.741	1.159	0.784	1.411	0.953	0.993	1.251	0.291209
P21291	69	K	Cysteine and glycine-rich protein 1 OS=Homo sapiens OX=9606 GN=CSRP1 PE=1 SV=3	CSRP1	1	4.76408e-08	84.105	2	YGPK(1)GYGYGQGAGTLSTDK	-2.4721	2		1.29873		0.701275			1.1342	0.995457	0.97418	0.969295	0.987225	0.93964		1.305		0.723			0.554
P21333	268	K	Filamin-A OS=Homo sapiens OX=9606 GN=FLNA PE=1 SV=4	FLNA	0.999978	0.0255301	109.88	3	AK(1)LKPGAPLRPK	-0.26273	1		1					1.12078	0.959205	0.999757	0.922215	0.988228	1.00981		1.043
P21333	1294	K	Filamin-A OS=Homo sapiens OX=9606 GN=FLNA PE=1 SV=4	FLNA	1	1.03956e-06	110.52	2	ALTQTGGPHVK(1)AR	-0.54908	6	1.50227	1.07392	0.852494	1.14123	0.724548	0.705539	1.12078	0.959205	0.999757	0.922215	0.988228	1.00981	1.34	1.12	0.853	1.237	0.733	0.699	0.806	0.356672
P21333	2559	K	Filamin-A OS=Homo sapiens OX=9606 GN=FLNA PE=1 SV=4	FLNA	1	5.46185e-09	90.806	3	ATCAPQHGAPGPGPADASK(1)VVAK	0.60685	1	1						1.12078	0.959205	0.999757	0.922215	0.988228	1.00981	0.892
P21333	2563	K	Filamin-A OS=Homo sapiens OX=9606 GN=FLNA PE=1 SV=4	FLNA	1	0.00898977	63.397	2	VVAK(1)GLGLSK	-1.1229	4			0.864884	1.37473	0.907053	0.85333	1.12078	0.959205	0.999757	0.922215	0.988228	1.00981			0.865	1.491	0.918	0.845	1.254
P21333	2623	K	Filamin-A OS=Homo sapiens OX=9606 GN=FLNA PE=1 SV=4	FLNA	1	0.00518002	68.49	2	DK(1)GEYTLVVK	-1.3868	2				1.46475		0.535248	1.12078	0.959205	0.999757	0.922215	0.988228	1.00981				1.588		0.53
P21333	994	K	Filamin-A OS=Homo sapiens OX=9606 GN=FLNA PE=1 SV=4	FLNA	1	3.72748e-10	115.35	2	DQEFTVK(1)SK	0.55678	11	1.90353	0.696361	0.498692	1.57069	0.72023	0.61049	1.12078	0.959205	0.999757	0.922215	0.988228	1.00981	1.698	0.726	0.499	1.703	0.729	0.605	1.039	0.896911
P21333	2024	K	Filamin-A OS=Homo sapiens OX=9606 GN=FLNA PE=1 SV=4	FLNA	1	7.93708e-07	127.94	2	ETGEHLVHVK(1)K	0.025984	4		1.18221		1.28826	0.926014	0.603515	1.12078	0.959205	0.999757	0.922215	0.988228	1.00981		1.232		1.397	0.937	0.598	0.793
P21333	906	K	Filamin-A OS=Homo sapiens OX=9606 GN=FLNA PE=1 SV=4	FLNA	1	0.00520616	88.24	2	GK(1)LDVQFSGLTK	-2.3173	2	1.032			0.968004			1.12078	0.959205	0.999757	0.922215	0.988228	1.00981	0.921			1.05			1.14
P21333	916	K	Filamin-A OS=Homo sapiens OX=9606 GN=FLNA PE=1 SV=4	FLNA	1	6.10431e-23	187.47	2	LDVQFSGLTK(1)GDAVR	-0.61037	7	1.03393	1.06621	0.611428	1.50267	0.917656	0.868099	1.12078	0.959205	0.999757	0.922215	0.988228	1.00981	0.923	1.112	0.612	1.629	0.929	0.86	1.291	0.415603
P21333	626	K	Filamin-A OS=Homo sapiens OX=9606 GN=FLNA PE=1 SV=4	FLNA	1	1.69119e-16	144.51	2	IECDDK(1)GDGSCDVR	0.057572	5	1.4471	1.79181	1.14897	0.222012		0.390109	1.12078	0.959205	0.999757	0.922215	0.988228	1.00981	1.291	1.868	1.149	0.241		0.386	0.218	0.00963616
P21333	975	K	Filamin-A OS=Homo sapiens OX=9606 GN=FLNA PE=1 SV=4	FLNA	1	0.00469584	83.623	2	IK(1)VSGLGEK	0.39592	4	1.28521	0.723752		1.28859	0.702444		1.12078	0.959205	0.999757	0.922215	0.988228	1.00981	1.147	0.755		1.397	0.711		1.108	0.878835
P21333	1801	K	Filamin-A OS=Homo sapiens OX=9606 GN=FLNA PE=1 SV=4	FLNA	1	0.000315678	79.059	2	K(1)GEITGEVR	-1.2756	4			0.715295	0.928446	1.23606	1.1202	1.12078	0.959205	0.999757	0.922215	0.988228	1.00981			0.715	1.007	1.251	1.109	1.57
P21333	700	K	Filamin-A OS=Homo sapiens OX=9606 GN=FLNA PE=1 SV=4	FLNA	1	6.48361e-14	144.72	3	TGVAVNKPAEFTVDAK(1)HGGK	0.60866	6	1.49271	0.987468	0.7166	1.22211	0.857048	0.724066	1.12078	0.959205	0.999757	0.922215	0.988228	1.00981	1.332	1.029	0.717	1.325	0.867	0.717	0.945	0.829024
P21333	1007	K	Filamin-A OS=Homo sapiens OX=9606 GN=FLNA PE=1 SV=4	FLNA	1	0.000212402	97.084	2	VASK(1)IVGPSGAAVPCK	-0.98188	2	1.4737			0.526295			1.12078	0.959205	0.999757	0.922215	0.988228	1.00981	1.315			0.571			0.434
P21333	1372	K	Filamin-A OS=Homo sapiens OX=9606 GN=FLNA PE=1 SV=4	FLNA	1	9.11325e-07	115.04	3	VHGPGIQSGTTNK(1)PNK	-0.080288	1	1						1.12078	0.959205	0.999757	0.922215	0.988228	1.00981	0.892
P21333	876	K	Filamin-A OS=Homo sapiens OX=9606 GN=FLNA PE=1 SV=4	FLNA	1	0.00153613	61.48	2	VK(1)AEGPGLSR	-2.3682	1	1						1.12078	0.959205	0.999757	0.922215	0.988228	1.00981	0.892
P21333	1071	K	Filamin-A OS=Homo sapiens OX=9606 GN=FLNA PE=1 SV=4	FLNA	1	1.16072e-27	148.62	2	VK(1)AFGPGLQGGSAGSPAR	-0.62426	3	1.69542		0.382432	0.922146			1.12078	0.959205	0.999757	0.922215	0.988228	1.00981	1.513		0.383	1			1.055
P21333	1538	K	Filamin-A OS=Homo sapiens OX=9606 GN=FLNA PE=1 SV=4	FLNA	1	0.0233352	40.386	2	VK(1)VLPTHDASK	-2.6065	1			1				1.12078	0.959205	0.999757	0.922215	0.988228	1.00981			1
P21333	1547	K	Filamin-A OS=Homo sapiens OX=9606 GN=FLNA PE=1 SV=4	FLNA	1	0.0475153	47.334	2	VLPTHDASK(1)VK	1.1302	1		1					1.12078	0.959205	0.999757	0.922215	0.988228	1.00981		1.043
P21333	771	K	Filamin-A OS=Homo sapiens OX=9606 GN=FLNA PE=1 SV=4	FLNA	1	7.71416e-06	144.27	2	VNVGAGSHPNK(1)VK	0.85797	5	1.15647	0.986126	0.352177	1.99562	0.509602		1.12078	0.959205	0.999757	0.922215	0.988228	1.00981	1.032	1.028	0.352	2.164	0.516		1.667	0.624925
P21333	1450	K	Filamin-A OS=Homo sapiens OX=9606 GN=FLNA PE=1 SV=4	FLNA	1	9.89501e-07	121.96	2	VPVHDVTDASK(1)VK	0.73339	4	1.74793	0.800087	0.727956	0.72403			1.12078	0.959205	0.999757	0.922215	0.988228	1.00981	1.56	0.834	0.728	0.785			0.754
P21333	1491	K	Filamin-A OS=Homo sapiens OX=9606 GN=FLNA PE=1 SV=4	FLNA	1	6.66837e-27	112.27	3	VQGPK(1)GLVEPVDVVDNADGTQTVNYVPSR	-0.47849	3	1.30032	0.488328		1.21135			1.12078	0.959205	0.999757	0.922215	0.988228	1.00981	1.16	0.509		1.314			1.575
P21333	508	K	Filamin-A OS=Homo sapiens OX=9606 GN=FLNA PE=1 SV=4	FLNA	1	0.000229763	101.48	2	VYTK(1)GAGSGELK	0.189	6	1.55909	1.25369	0.867469	0.940076	0.682374	0.697301	1.12078	0.959205	0.999757	0.922215	0.988228	1.00981	1.391	1.307	0.868	1.019	0.691	0.691	0.673	0.116761
P22061	4	K	Protein-L-isoaspartate(D-aspartate) O-methyltransferase OS=Homo sapiens OX=9606 GN=PCMT1 PE=1 SV=4	PCMT1	1	5.28528e-13	180.17	4	AWK(1)SGGASHSELIHNLRK	0.15917	12	1.05918	0.99581	0.880176	1.24674	0.908997	0.909097	1.07296	0.926566	0.959879	1.1289	0.906701	1.00499	0.987	1.075	0.917	1.104	1.003	0.905	1.011	0.899949
P22234	11	K	Multifunctional protein ADE2 OS=Homo sapiens OX=9606 GN=PAICS PE=1 SV=3	PAICS	1	3.78758e-07	146.27	2	ATAEVLNIGK(1)K	-0.67111	5		1.08917	0.892711	1.24872	0.772874	0.996522	0.949788	0.936367	1.06606	0.987416	0.972803	1.08757		1.163	0.837	1.265	0.794	0.916	0.992	0.951327
P22234	235	K	Multifunctional protein ADE2 OS=Homo sapiens OX=9606 GN=PAICS PE=1 SV=3	PAICS	1	0.000546135	82.437	2	DLK(1)EVTPEGLQMVK	-1.7591	5		0.844325	0.428276	2.0614	0.939125	0.726872	0.949788	0.936367	1.06606	0.987416	0.972803	1.08757		0.902	0.402	2.088	0.965	0.668	1.902	0.334046
P22314	8	K	Ubiquitin-like modifier-activating enzyme 1 OS=Homo sapiens OX=9606 GN=UBA1 PE=1 SV=3	UBA1	1	0.06889	41.025	2	SSSPLSK(1)K	-0.13067	1				1			1.04997	0.95256	0.971916	1.10083	0.935659	0.989068				0.908
P22392	49	K	Nucleoside diphosphate kinase B OS=Homo sapiens OX=9606 GN=NME2 PE=1 SV=1	NME2	1	2.51195e-06	96.313	3	ASEEHLK(1)QHYIDLK	0.55093	6	1.25087	1.00588	0.923277	1.10083	0.805755	0.913385
P22392	124	K	Nucleoside diphosphate kinase B OS=Homo sapiens OX=9606 GN=NME2 PE=1 SV=1	NME2	1	2.11065e-10	142.51	2	NIIHGSDSVK(1)SAEK	-0.063742	5	1.74214		0.486636	1.38301	0.719073	0.669141
P22626	104	K	Heterogeneous nuclear ribonucleoproteins A2/B1 OS=Homo sapiens OX=9606 GN=HNRNPA2B1 PE=1 SV=2	HNRNPA2B1	1	9.1397e-05	97.175	2	EESGK(1)PGAHVTVK	0.23015	5	1.43271		0.713414	0.902903	1.03581	0.91517	0.942668	0.967485	1.02758	1.00812	0.991078	1.06307	1.52		0.694	0.896	1.045	0.861	0.844	0.765626
P22681	521	K	E3 ubiquitin-protein ligase CBL OS=Homo sapiens OX=9606 GN=CBL PE=1 SV=2	CBL	1	0.00117531	62.711	3	VCVPSSASALGTASK(1)AASGSLHK	0.27958	2	0.933074			1.06693			1.07211	0.886653	0.95398	1.0135	0.959428	1.11433	0.87			1.053			1.21
P23193	117	K	Transcription elongation factor A protein 1 OS=Homo sapiens OX=9606 GN=TCEA1 PE=1 SV=2	TCEA1	1	0.000499465	44.571	3	EESTSSGNVSNRK(1)DETNAR	0.61414	1						1	1.21845	0.857537	0.935292	1.19308	0.863683	0.931958						1.073
P23246	703	K	Splicing factor, proline- and glutamine-rich OS=Homo sapiens OX=9606 GN=SFPQ PE=1 SV=2	SFPQ	1	7.57629e-11	191.67	2	EEYEGPNK(1)K	0.63425	14	1.10238	1.14229	0.833509	1.43734	0.682214	0.80227	0.936568	0.981251	1.03052	1.00044	0.99072	1.06049	1.177	1.164	0.809	1.437	0.689	0.757	0.915	0.644459
P23246	211	K	Splicing factor, proline- and glutamine-rich OS=Homo sapiens OX=9606 GN=SFPQ PE=1 SV=2	SFPQ	1	0.000169474	73.805	2	GGK(1)MPGGPK	-0.28785	7	0.652703		1.08307	1.35973		0.904489	0.936568	0.981251	1.03052	1.00044	0.99072	1.06049	0.697		1.051	1.359		0.853	1.265	0.5368
P23246	232	K	Splicing factor, proline- and glutamine-rich OS=Homo sapiens OX=9606 GN=SFPQ PE=1 SV=2	SFPQ	1	4.47835e-06	66.619	3	PGGGPGLSTPGGHPK(1)PPHR	1.7004	2				1.26004	0.739963		0.936568	0.981251	1.03052	1.00044	0.99072	1.06049				1.259	0.747
P23284	195	K	Peptidyl-prolyl cis-trans isomerase B OS=Homo sapiens OX=9606 GN=PPIB PE=1 SV=2	PPIB	0.972025	0.00123822	57.279	2	DK(0.028)PLK(0.972)DVIIADCGK	-1.6003	2			0.553605	1.4464			0.967687	0.962002	1.02037	1.01206	1.02533	1.01255			0.543	1.429			2.632
P23284	116	K	Peptidyl-prolyl cis-trans isomerase B OS=Homo sapiens OX=9606 GN=PPIB PE=1 SV=2	PPIB	1	0.00596303	52.863	2	GDGTGGK(1)SIYGER	-1.6864	3		1.0791		1.45513	0.465769		0.967687	0.962002	1.02037	1.01206	1.02533	1.01255		1.122		1.438	0.454		0.843
P23284	209	K	Peptidyl-prolyl cis-trans isomerase B OS=Homo sapiens OX=9606 GN=PPIB PE=1 SV=2	PPIB	1	0.0465078	52.591	2	IEVEK(1)PFAIAK	0.51221	1				1			0.967687	0.962002	1.02037	1.01206	1.02533	1.01255				0.988
P23284	215	K	Peptidyl-prolyl cis-trans isomerase B OS=Homo sapiens OX=9606 GN=PPIB PE=1 SV=2	PPIB	0.999997	0.00161161	83.214	2	IEVEKPFAIAK(1)E	-0.95319	5	0.941631	0.895343		1.29793	0.938094	0.927003	0.967687	0.962002	1.02037	1.01206	1.02533	1.01255	0.973	0.931		1.282	0.915	0.916	1.09	0.649427
P23284	165	K	Peptidyl-prolyl cis-trans isomerase B OS=Homo sapiens OX=9606 GN=PPIB PE=1 SV=2	PPIB	1	0.00215096	60	2	TAWLDGK(1)HVVFGK	-0.61482	1	1						0.967687	0.962002	1.02037	1.01206	1.02533	1.01255	1.033
P23396	10	K	40S ribosomal protein S3 OS=Homo sapiens OX=9606 GN=RPS3 PE=1 SV=2	RPS3	1	0.00647825	60.892	2	K(1)FVADGIFK	1.0831	3	1.46733	1.00703	0.525636				0.974034	0.962223	1.0503	1.00856	0.986389	1.01849	1.506	1.047	0.5
P23396	62	K	40S ribosomal protein S3 OS=Homo sapiens OX=9606 GN=RPS3 PE=1 SV=2	RPS3	1	0.00816375	51.872	2	TQNVLGEK(1)GR	1.2965	4	1.5193	1.25525	0.438986	0.78646			0.974034	0.962223	1.0503	1.00856	0.986389	1.01849	1.56	1.305	0.418	0.78			0.713
P23396	108	K	40S ribosomal protein S3 OS=Homo sapiens OX=9606 GN=RPS3 PE=1 SV=2	RPS3	1	0.00838571	51.864	2	YK(1)LLGGLAVR	0.39918	3		0.923804	0.544967	1.53123			0.974034	0.962223	1.0503	1.00856	0.986389	1.01849		0.96	0.519	1.518			2.053
P23497	306	K	Nuclear autoantigen Sp-100 OS=Homo sapiens OX=9606 GN=SP100 PE=1 SV=3	SP100	0.999983	2.81913e-08	140.01	3	EKPFSNSK(1)VECQAQAR	1.2216	6		1.41948	0.931553	0.271261	1.35189	1.02581	0.488516	1.34804	0.803677	0.713585	1.53479	1.11139		1.053	1.159	0.38	0.881	0.923	0.658	0.280577
P23526	389	K	Adenosylhomocysteinase OS=Homo sapiens OX=9606 GN=AHCY PE=1 SV=4	AHCY	1	0.000312584	74.524	2	K(1)LDEAVAEAHLGK	1.1657	1		1					1.01924	0.959469	1.06774	1.04936	0.936603	0.967585		1.042
P23526	188	K	Adenosylhomocysteinase OS=Homo sapiens OX=9606 GN=AHCY PE=1 SV=4	AHCY	1	0.00254422	67.881	2	SK(1)FDNLYGCR	2.0686	3		1.21031	0.873384	0.91631			1.01924	0.959469	1.06774	1.04936	0.936603	0.967585		1.261	0.818	0.873			0.84
P23527	35	K	Histone H2B type 1-O OS=Homo sapiens OX=9606 GN=H2BC17 PE=1 SV=3	H2BC17	1	0.000180794	96.957	2	K(1)ESYSIYVYK	0.50797	5	1.22814		0.819692	1.06645	0.882347	1.00337
Q93079	6	K	Histone H2B type 1-H OS=Homo sapiens OX=9606 GN=H2BC9 PE=1 SV=3	H2BC9	1	9.67842e-07	183.13	2	PDPAK(1)SAPAPK	-1.0296	10	1.07122	0.984195	0.865424	1.30339	0.90181	0.873953
P23528	44	K	Cofilin-1 OS=Homo sapiens OX=9606 GN=CFL1 PE=1 SV=3	CFL1	1	2.10723e-05	120.33	2	AVLFCLSEDK(1)K	-0.29926	12	1.03499	1.47491	0.856433	1.27393	0.763591	0.59614	0.990156	1.0085	1.03646	0.923799	0.993195	1.04789	1.045	1.462	0.826	1.379	0.769	0.569	0.815	0.469525
P23528	45	K	Cofilin-1 OS=Homo sapiens OX=9606 GN=CFL1 PE=1 SV=3	CFL1	1	0.000337274	96.311	2	K(1)NIILEEGK	0.75136	6	1.26857	1.19848	0.860209	0.950323	0.906269	0.816156	0.990156	1.0085	1.03646	0.923799	0.993195	1.04789	1.281	1.188	0.83	1.029	0.912	0.779	0.824	0.30819
P23528	144	K	Cofilin-1 OS=Homo sapiens OX=9606 GN=CFL1 PE=1 SV=3	CFL1	1	5.78736e-17	157.74	2	HELQANCYEEVK(1)DR	-0.063741	11	1.1101	1.37943	0.83299	0.914932	0.832029	0.930519	0.990156	1.0085	1.03646	0.923799	0.993195	1.04789	1.121	1.368	0.804	0.99	0.838	0.888	0.825	0.350497
P23528	132	K	Cofilin-1 OS=Homo sapiens OX=9606 GN=CFL1 PE=1 SV=3	CFL1	1	1.42256e-08	88.421	3	LTGIK(1)HELQANCYEEVK	0.18002	7		1.06578	0.791386	1.51501	0.807396	0.820427	0.990156	1.0085	1.03646	0.923799	0.993195	1.04789		1.057	0.764	1.64	0.813	0.783	1.185	0.740062
P23528	121	K	Cofilin-1 OS=Homo sapiens OX=9606 GN=CFL1 PE=1 SV=3	CFL1	1	0.0306792	55.235	2	MIYASSK(1)DAIK	-0.098475	3	1.16487		0.902624	0.932501			0.990156	1.0085	1.03646	0.923799	0.993195	1.04789	1.176		0.871	1.009			0.986
P23528	78	K	Cofilin-1 OS=Homo sapiens OX=9606 GN=CFL1 PE=1 SV=3	CFL1	1	0.035157	49.325	2	MLPDK(1)DCR	1.1956	4	0.910589	1.39857			0.827034	0.863807	0.990156	1.0085	1.03646	0.923799	0.993195	1.04789	0.92	1.387			0.833	0.824	0.718	0.270145
P23528	19	K	Cofilin-1 OS=Homo sapiens OX=9606 GN=CFL1 PE=1 SV=3	CFL1	1	0.028696	63.301	2	VFNDMK(1)VR	0.6406	2			0.559419	1.44058			0.990156	1.0085	1.03646	0.923799	0.993195	1.04789			0.54	1.559			2.887
P23528	92	K	Cofilin-1 OS=Homo sapiens OX=9606 GN=CFL1 PE=1 SV=3	CFL1	1	1.19942e-10	145.75	2	YALYDATYETK(1)ESK	-0.80427	5	1.63532	1.13182		1.08054	0.629959	0.522368	0.990156	1.0085	1.03646	0.923799	0.993195	1.04789	1.652	1.122		1.17	0.634	0.498	0.553	0.171945
P23588	365	K	Eukaryotic translation initiation factor 4B OS=Homo sapiens OX=9606 GN=EIF4B PE=1 SV=2	EIF4B	1	0.00190352	45.183	2	AASIFGGAK(1)PVDTAAR	-0.041398	1		1					1.05685	0.977038	1.02998	0.965257	0.921161	1.04971		1.024
P23588	333	K	Eukaryotic translation initiation factor 4B OS=Homo sapiens OX=9606 GN=EIF4B PE=1 SV=2	EIF4B	1	0.00128963	134.85	2	PK(1)LNLKPR	-0.94424	9	1.03483	1.31954	1.10877	0.892884	0.828667	0.815303	1.05685	0.977038	1.02998	0.965257	0.921161	1.04971	0.979	1.351	1.077	0.925	0.9	0.777	0.764	0.0746066
P23588	586	K	Eukaryotic translation initiation factor 4B OS=Homo sapiens OX=9606 GN=EIF4B PE=1 SV=2	EIF4B	1	9.76934e-13	157.67	2	KPEENPASK(1)FSSASK	-0.40847	6	0.819113	1.20446	0.929944	0.838031	1.22653	0.981918	1.05685	0.977038	1.02998	0.965257	0.921161	1.04971	0.775	1.233	0.903	0.868	1.332	0.935	1.077	0.712796
P23588	343	K	Eukaryotic translation initiation factor 4B OS=Homo sapiens OX=9606 GN=EIF4B PE=1 SV=2	EIF4B	1	5.36688e-18	164.22	2	STPK(1)EDDSSASTSQSTR	-0.34798	2		0.600696		1.3993			1.05685	0.977038	1.02998	0.965257	0.921161	1.04971		0.615		1.45			2.358
P29692	242	K	Elongation factor 1-delta OS=Homo sapiens OX=9606 GN=EEF1D PE=1 SV=5	EEF1D	1	6.32101e-05	90.306	2	K(1)LQIQCVVEDDK	-2.0696	4		1.50392	0.758072	0.792298		0.945715	1.02913	0.968545	1.02235	1.02058	0.946752	1.01264		1.553	0.741	0.776		0.934	0.745	0.606088
P24534	129	K	Elongation factor 1-beta OS=Homo sapiens OX=9606 GN=EEF1B2 PE=1 SV=3	EEF1B2	1	0.00265757	65.313	2	LAQYESK(1)K	-0.60092	6	1.03567	1.09808	0.829339	1.32119	0.826448	0.889278	1.0782	0.990482	1.02133	0.960503	0.942929	1.00656	0.961	1.109	0.812	1.376	0.876	0.883	1.088	0.712486
P25398	102	K	40S ribosomal protein S12 OS=Homo sapiens OX=9606 GN=RPS12 PE=1 SV=3	RPS12	1	0.00100401	90.142	2	K(1)VVGCSCVVVK	1.3565	6	0.85713	1.39875	1.07531	0.838973	0.916236	0.913606	1.03945	1.01798	0.98473	1.0037	0.977468	0.97667	0.825	1.374	1.092	0.836	0.937	0.935	0.823	0.314556
P25440	275	K	Bromodomain-containing protein 2 OS=Homo sapiens OX=9606 GN=BRD2 PE=1 SV=2	BRD2	1	0.000825374	56.08	3	SLHSAGPPLLAVTAAPPAQPLAK(1)K	-0.010479	2		0.681891		1.31811			0.94608	1.00042	1.02807	0.980097	1.01743	1.02791		0.682		1.345			1.972
P25490	183	K	Transcriptional repressor protein YY1 OS=Homo sapiens OX=9606 GN=YY1 PE=1 SV=2	YY1	1	3.26413e-42	231.82	2	K(1)SYLSGGAGAAGGGGADPGNK	0.12705	5		0.998541	0.979203	0.388297	1.11429	1.51967	0.922102	0.991606	1.03458	0.923445	1.05339	1.07488		1.007	0.946	0.42	1.058	1.414	0.987	0.800382
P25490	203	K	Transcriptional repressor protein YY1 OS=Homo sapiens OX=9606 GN=YY1 PE=1 SV=2	YY1	1	4.17123e-34	166.48	2	SYLSGGAGAAGGGGADPGNK(1)K	-0.21087	3			0.973706	0.474389		1.5519	0.922102	0.991606	1.03458	0.923445	1.05339	1.07488			0.941	0.514		1.444	1.04
P25490	208	K	Transcriptional repressor protein YY1 OS=Homo sapiens OX=9606 GN=YY1 PE=1 SV=2	YY1	1	9.29246e-06	162.8	2	KWEQK(1)QVQIK	-0.39516	6	0.580819	1.40828	0.818471	0.62387	1.15382	1.41473	0.922102	0.991606	1.03458	0.923445	1.05339	1.07488	0.63	1.42	0.791	0.676	1.095	1.316	1.087	0.750782
P25685	195	K	DnaJ homolog subfamily B member 1 OS=Homo sapiens OX=9606 GN=DNAJB1 PE=1 SV=4	DNAJB1	1	0.00621053	56.378	2	LNPDGK(1)SIR	-0.90066	5	0.883027		1.09241	1.02848	1.02891	0.967179	0.828422	1.05808	1.04878	1.02109	1.02697	1.01666	1.066		1.042	1.007	1.002	0.951	0.936	0.0776194
P25786	243	K	Proteasome subunit alpha type-1 OS=Homo sapiens OX=9606 GN=PSMA1 PE=1 SV=1	PSMA1	1	1.30435e-17	190.68	2	K(1)AQPAQPADEPAEK	0.51096	6	1.11009	1.10447	0.788051	1.15485	0.939715	0.902817	0.981258	1.00819	1.00842	0.981302	1.05125	0.969574	1.131	1.096	0.781	1.177	0.894	0.931	0.998	0.979778
P25788	57	K	Proteasome subunit alpha type-3 OS=Homo sapiens OX=9606 GN=PSMA3 PE=1 SV=2	PSMA3	1	1.14528e-06	126.48	2	LVLSK(1)LYEEGSNK	-1.0387	4		0.975485	1.03442	1.19145		0.798646	0.912847	0.966437	1.04656	0.983837	1.01162	1.0787		1.009	0.988	1.211		0.74	0.977	0.848936
P26038	523	K	Moesin OS=Homo sapiens OX=9606 GN=MSN PE=1 SV=3	MSN	1	1.31635e-09	203.8	2	HLK(1)ALTSELANAR	-0.49921	5	1.71102	0.70421	0.711104	1.22778	0.645882		1.12076	0.962228	1.01862	0.987	0.893554	1.01784	1.527	0.732	0.698	1.244	0.723		0.998	0.943254
P26038	438	K	Moesin OS=Homo sapiens OX=9606 GN=MSN PE=1 SV=3	MSN	1	0.00018267	90.142	2	K(1)ESEAVEWQQK	0.80048	2					0.617375	1.38263	1.12076	0.962228	1.01862	0.987	0.893554	1.01784					0.691	1.358
P26038	72	K	Moesin OS=Homo sapiens OX=9606 GN=MSN PE=1 SV=3	MSN	1	0.000940408	118.06	2	K(1)ESPLLFK	-0.51415	6	1.54213	0.679453	0.337277	2.21526	0.551945	0.673931	1.12076	0.962228	1.01862	0.987	0.893554	1.01784	1.376	0.706	0.331	2.244	0.618	0.662	1.46	0.583561
P26038	64	K	Moesin OS=Homo sapiens OX=9606 GN=MSN PE=1 SV=3	MSN	1	0.00236968	105.81	2	K(1)VTAQDVR	-1.3307	1				1			1.12076	0.962228	1.01862	0.987	0.893554	1.01784				1.013
P26038	3	K	Moesin OS=Homo sapiens OX=9606 GN=MSN PE=1 SV=3	MSN	1	0.00530287	105.04	2	PK(1)TISVR	0.36323	6	1.25647	0.842364	0.664225	1.51281	0.851132	0.872999	1.12076	0.962228	1.01862	0.987	0.893554	1.01784	1.121	0.875	0.652	1.533	0.953	0.858	1.263	0.398424
P26038	162	K	Moesin OS=Homo sapiens OX=9606 GN=MSN PE=1 SV=3	MSN	1	0.000804261	103.8	2	VLEQHK(1)LNK	-0.26738	6	1.16222	1.01603	0.87017	1.07868	0.886137	0.98677	1.12076	0.962228	1.01862	0.987	0.893554	1.01784	1.037	1.056	0.854	1.093	0.992	0.969	1.036	0.642058
P26358	1121	K	DNA (cytosine-5)-methyltransferase 1 OS=Homo sapiens OX=9606 GN=DNMT1 PE=1 SV=2	DNMT1	0.943684	0.000212989	114.5	3	GK(0.056)PK(0.944)SQACEPSEPEIEIK	0.070019	6	0.687262	1.42985	1.11376	0.37473	1.14977	1.24462	0.557624	1.16258	1.13542	0.533185	1.28372	1.32747	1.232	1.23	0.981	0.703	0.896	0.938	0.737	0.0585183
P26358	961	K	DNA (cytosine-5)-methyltransferase 1 OS=Homo sapiens OX=9606 GN=DNMT1 PE=1 SV=2	DNMT1	1	1.16322e-05	106.11	3	K(1)EPVDEDLYPEHYR	0.1915	1						1	0.557624	1.16258	1.13542	0.533185	1.28372	1.32747						0.753
P26358	173	K	DNA (cytosine-5)-methyltransferase 1 OS=Homo sapiens OX=9606 GN=DNMT1 PE=1 SV=2	DNMT1	1	4.78236e-22	198.33	2	QTTITSHFAK(1)GPAK	-1.2886	3	0.695612	1.22024	1.08415				0.557624	1.16258	1.13542	0.533185	1.28372	1.32747	1.247	1.05	0.955
P26358	142	K	DNA (cytosine-5)-methyltransferase 1 OS=Homo sapiens OX=9606 GN=DNMT1 PE=1 SV=2	DNMT1	0.999978	0.00477097	61.067	3	SK(1)SDGEAKPEPSPSPR	0.8035	2					0.835993	1.16401	0.557624	1.16258	1.13542	0.533185	1.28372	1.32747					0.651	0.877
P26368	70	K	Splicing factor U2AF 65 kDa subunit OS=Homo sapiens OX=9606 GN=U2AF2 PE=1 SV=4	U2AF2	1	0.000544517	79.311	2	GAK(1)EEHGGLIR	-0.43878	6	0.765983	1.17063	0.78496	1.09637	1.07958	1.10247	0.971771	1.05773	1.04266	0.924514	1.01663	0.986698	0.788	1.107	0.753	1.186	1.062	1.117	1.271	0.113529
P26373	200	K	60S ribosomal protein L13 OS=Homo sapiens OX=9606 GN=RPL13 PE=1 SV=4	RPL13	1	0.00202087	81.335	2	AK(1)EAAEQDVEK	-0.26129	2	1.22417			0.775834			1.06936	0.798967	1.01464	1.16728	0.926973	1.02278	1.145			0.665			0.581
P26373	123	K	60S ribosomal protein L13 OS=Homo sapiens OX=9606 GN=RPL13 PE=1 SV=4	RPL13	1	0.00341138	90.308	2	SK(1)LILFPR	-0.64954	6	1.16258	0.792679	0.818739	1.63273	0.755838	0.837441	1.06936	0.798967	1.01464	1.16728	0.926973	1.02278	1.087	0.992	0.807	1.399	0.815	0.819	1.051	0.91195
P26599	137	K	Polypyrimidine tract-binding protein 1 OS=Homo sapiens OX=9606 GN=PTBP1 PE=1 SV=1	PTBP1	1	4.79842e-06	153.33	2	ELK(1)TDSSPNQAR	0.17736	2		0.984519		1.01548			1.04011	1.0307	0.966625	1.05132	0.993232	0.918006		0.955		0.966			1.012
P26599	410	K	Polypyrimidine tract-binding protein 1 OS=Homo sapiens OX=9606 GN=PTBP1 PE=1 SV=1	PTBP1	1	4.08538e-13	203.8	2	ITLSK(1)HQNVQLPR	-0.5088	18	1.38165	0.997851	0.688415	1.27068	0.788543	0.872856	1.04011	1.0307	0.966625	1.05132	0.993232	0.918006	1.328	0.968	0.712	1.209	0.794	0.951	0.982	0.997017
P26640	1230	K	Valine--tRNA ligase OS=Homo sapiens OX=9606 GN=VARS1 PE=1 SV=4	VARS1	1	6.17815e-13	96.453	2	AASGYPVK(1)VPLEVQEADEAK	-0.050483	6	0.514876	0.362698	0.680743	2.3776	0.787663	1.27642	1.11044	0.923849	0.962764	1.13433	0.905731	0.962882	0.464	0.393	0.707	2.096	0.87	1.326	2.744	0.0338525
P26640	246	K	Valine--tRNA ligase OS=Homo sapiens OX=9606 GN=VARS1 PE=1 SV=4	VARS1	1	1.33753e-05	150.53	2	LEK(1)FQQK	-0.50747	9	0.355791	1.48397	0.190689	1.30098	1.38554	1.28303	1.11044	0.923849	0.962764	1.13433	0.905731	0.962882	0.32	1.606	0.198	1.147	1.53	1.332	1.887	0.177141
P26640	229	K	Valine--tRNA ligase OS=Homo sapiens OX=9606 GN=VARS1 PE=1 SV=4	VARS1	1	0.000497078	58.045	3	PLSHQPGPEAPALPK(1)TAAQLK	-0.68204	2		0.353415		1.64659			1.11044	0.923849	0.962764	1.13433	0.905731	0.962882		0.383		1.452			3.791
P26641	434	K	Elongation factor 1-gamma OS=Homo sapiens OX=9606 GN=EEF1G PE=1 SV=3	EEF1G	1	0.00110619	82.716	2	AFNQGK(1)IFK	0.55667	6	1.663	0.930188	0.904919	1.3487	0.532886	0.620305	1.03583	0.971943	1.06143	1.02657	0.929052	0.975166	1.605	0.957	0.853	1.314	0.574	0.636	0.739	0.361201
P26641	277	K	Elongation factor 1-gamma OS=Homo sapiens OX=9606 GN=EEF1G PE=1 SV=3	EEF1G	1	0.00212148	78.932	2	AK(1)DPFAHLPK	0.34851	5	1.37363	0.803647	0.754857	1.43725		0.630615	1.03583	0.971943	1.06143	1.02657	0.929052	0.975166	1.326	0.827	0.711	1.4		0.647	1.072	0.934667
P26641	227	K	Elongation factor 1-gamma OS=Homo sapiens OX=9606 GN=EEF1G PE=1 SV=3	EEF1G	1	0.000895253	82.716	2	FAETQPK(1)K	0.20653	4	0.972532		0.61726	1.6079	0.802309		1.03583	0.971943	1.06143	1.02657	0.929052	0.975166	0.939		0.582	1.566	0.864		1.598	0.356842
P26641	220	K	Elongation factor 1-gamma OS=Homo sapiens OX=9606 GN=EEF1G PE=1 SV=3	EEF1G	1	0.000525155	137.88	2	K(1)FAETQPK	0.64512	12	1.11713	0.932998	1.06529	1.08551	0.829928	0.969145	1.03583	0.971943	1.06143	1.02657	0.929052	0.975166	1.078	0.96	1.004	1.057	0.893	0.994	0.968	0.599464
P26641	212	K	Elongation factor 1-gamma OS=Homo sapiens OX=9606 GN=EEF1G PE=1 SV=3	EEF1G	1	0.000543074	90.142	2	LCEK(1)MAQFDAK	4.8582	3		0.838653		1.77365		0.387698	1.03583	0.971943	1.06143	1.02657	0.929052	0.975166		0.863		1.728		0.398	1.232
P26641	219	K	Elongation factor 1-gamma OS=Homo sapiens OX=9606 GN=EEF1G PE=1 SV=3	EEF1G	1	0.032691	41.025	2	MAQFDAK(1)K	0.50166	1	1						1.03583	0.971943	1.06143	1.02657	0.929052	0.975166	0.965
P26718	107	K	NKG2-D type II integral membrane protein OS=Homo sapiens OX=9606 GN=KLRK1 PE=1 SV=1	KLRK1	1	0.0440224	40.533	3	NWICYK(1)NNCYQFFDESK	1.4914	1	1
P27348	11	K	14-3-3 protein theta OS=Homo sapiens OX=9606 GN=YWHAQ PE=1 SV=1	YWHAQ	1	0.000348441	96.311	2	AK(1)LAEQAER	0.042527	6	1.41416	1.11112	0.866305	0.927646	0.865457	0.815312	1.04009	0.991193	1.03384	1.05154	0.913948	0.969394	1.36	1.121	0.838	0.882	0.947	0.841	0.804	0.240815
P27348	85	K	14-3-3 protein theta OS=Homo sapiens OX=9606 GN=YWHAQ PE=1 SV=1	YWHAQ	1	0.0237322	58.426	2	EK(1)VESELR	1.965	1	1						1.04009	0.991193	1.03384	1.05154	0.913948	0.969394	0.961
P63104	158	K	14-3-3 protein zeta/delta OS=Homo sapiens OX=9606 GN=YWHAZ PE=1 SV=1	YWHAZ	1	0.000169019	132.39	2	K(1)EMQPTHPIR	-0.046479	6	1.24293	1.40555	0.714841	1.26318	0.687185	0.686317	1.07765	0.967641	1.02592	1.03147	0.92977	0.967548	1.153	1.453	0.697	1.225	0.739	0.709	0.809	0.514343
P27348	9	K	14-3-3 protein theta OS=Homo sapiens OX=9606 GN=YWHAQ PE=1 SV=1	YWHAQ	1	0.00987986	85.813	2	TELIQK(1)AK	0.96284	6	1.44378	1.06371	0.739572	1.38079	0.769809	0.602343	1.04009	0.991193	1.03384	1.05154	0.913948	0.969394	1.388	1.073	0.715	1.313	0.842	0.621	0.874	0.641267
P27694	163	K	Replication protein A 70 kDa DNA-binding subunit OS=Homo sapiens OX=9606 GN=RPA1 PE=1 SV=2	RPA1	1	0.00104395	88.921	2	AYGASK(1)TFGK	-0.083319	6	0.725624	1.15812	0.97404	0.945216	1.07338	1.12362	0.853962	1.05617	0.981871	0.958903	1.07625	1.07284	0.85	1.097	0.992	0.986	0.997	1.047	1.031	0.665662
P27694	167	K	Replication protein A 70 kDa DNA-binding subunit OS=Homo sapiens OX=9606 GN=RPA1 PE=1 SV=2	RPA1	1	1.80705e-18	141.36	2	TFGK(1)AAGPSLSHTSGGTQSK	-0.44144	12	0.829567	1.06183	0.962864	1.13781	0.994093	1.01383	0.853962	1.05617	0.981871	0.958903	1.07625	1.07284	0.971	1.005	0.981	1.187	0.924	0.945	1.033	0.759149
P27694	88	K	Replication protein A 70 kDa DNA-binding subunit OS=Homo sapiens OX=9606 GN=RPA1 PE=1 SV=2	RPA1	1	5.88235e-10	170.95	2	FIVNTLK(1)DGR	0.26071	6	0.941887	0.964548	0.908957	1.35231	0.926832	0.905465	0.853962	1.05617	0.981871	0.958903	1.07625	1.07284	1.103	0.913	0.926	1.41	0.861	0.844	1.059	0.868929
P27694	267	K	Replication protein A 70 kDa DNA-binding subunit OS=Homo sapiens OX=9606 GN=RPA1 PE=1 SV=2	RPA1	1	0.00106927	99.855	2	IANK(1)QFTAVK	1.2334	6	0.882393	1.05495	0.897161	1.1696	1.06274	0.933159	0.853962	1.05617	0.981871	0.958903	1.07625	1.07284	1.033	0.999	0.914	1.22	0.987	0.87	1.044	0.756128
P27695	7	K	DNA-(apurinic or apyrimidinic site) endonuclease OS=Homo sapiens OX=9606 GN=APEX1 PE=1 SV=2	APEX1	1	3.03626e-11	177.47	2	K(1)GAVAEDGDELR	0.66853	6	1.09378	1.09011	0.968344	1.04238	0.903251	0.902133	1.09838	0.908143	0.978821	1.12415	0.910572	0.979925	0.996	1.2	0.989	0.927	0.992	0.921	0.892	0.175666
P27695	32	K	DNA-(apurinic or apyrimidinic site) endonuclease OS=Homo sapiens OX=9606 GN=APEX1 PE=1 SV=2	APEX1	0.999561	5.55646e-26	204.61	3	K(1)NDKEAAGEGPALYEDPPDQK	-0.58825	5	1.04258		0.889889	1.48308	0.838901	0.745546	1.09838	0.908143	0.978821	1.12415	0.910572	0.979925	0.949		0.909	1.319	0.921	0.761	1.077	0.833966
P27797	143	K	Calreticulin OS=Homo sapiens OX=9606 GN=CALR PE=1 SV=1	CALR	1	0.000886814	69.905	2	K(1)VHVIFNYK	-0.26916	2	0.937912					1.06209	0.977603	0.910594	0.936058	1.03812	1.03834	1.09928	0.959					0.966	1.007
P27816	718	K	Microtubule-associated protein 4 OS=Homo sapiens OX=9606 GN=MAP4 PE=1 SV=3	MAP4	1	0.000222925	114.39	2	AK(1)TQPTSLPK	0.40792	6	0.928195	1.17449	0.816041	0.949845	1.09156	1.03987	1.03016	0.940871	1.00494	1.03097	0.973915	1.01915	0.901	1.248	0.812	0.921	1.121	1.02	1.034	0.753411
P27816	352	K	Microtubule-associated protein 4 OS=Homo sapiens OX=9606 GN=MAP4 PE=1 SV=3	MAP4	1	0.00605559	50.834	2	DVTLLK(1)ETER	-1.7041	3	1.0793	1.06357			0.85713		1.03016	0.940871	1.00494	1.03097	0.973915	1.01915	1.048	1.13			0.88		0.808
P27816	403	K	Microtubule-associated protein 4 OS=Homo sapiens OX=9606 GN=MAP4 PE=1 SV=3	MAP4	1	0.0631066	47.349	2	ENK(1)IVPAK	4.7803	1	1						1.03016	0.940871	1.00494	1.03097	0.973915	1.01915	0.971
P27816	318	K	Microtubule-associated protein 4 OS=Homo sapiens OX=9606 GN=MAP4 PE=1 SV=3	MAP4	1	0.00843684	79.059	2	EVALVK(1)DVR	-0.76252	5		1.07077	0.775898	1.29485	0.976859	0.881619	1.03016	0.940871	1.00494	1.03097	0.973915	1.01915		1.138	0.772	1.256	1.003	0.865	1.09	0.674252
P27816	1060	K	Microtubule-associated protein 4 OS=Homo sapiens OX=9606 GN=MAP4 PE=1 SV=3	MAP4	1	0.00035928	109.36	2	IESQK(1)LNFK	-0.28154	6	0.933398	1.15667	0.837797	0.995749	1.04832	1.02806	1.03016	0.940871	1.00494	1.03097	0.973915	1.01915	0.906	1.229	0.834	0.966	1.076	1.009	1.028	0.756242
P27816	634	K	Microtubule-associated protein 4 OS=Homo sapiens OX=9606 GN=MAP4 PE=1 SV=3	MAP4	1	1.06777e-12	139.7	2	K(1)CSLPAEEDSVLEK	-0.23311	6	1.18681	0.875243	0.70227	1.34113	1.01921	0.875336	1.03016	0.940871	1.00494	1.03097	0.973915	1.01915	1.152	0.93	0.699	1.301	1.047	0.859	1.153	0.472903
P27816	871	K	Microtubule-associated protein 4 OS=Homo sapiens OX=9606 GN=MAP4 PE=1 SV=3	MAP4	1	9.433e-28	177.74	2	K(1)TTTLSGTAPAAGVVPSR	-0.40267	6	1.06001	0.901712	0.764155	1.04483	1.11451	1.11478	1.03016	0.940871	1.00494	1.03097	0.973915	1.01915	1.029	0.958	0.76	1.013	1.144	1.094	1.183	0.14841
P27816	1034	K	Microtubule-associated protein 4 OS=Homo sapiens OX=9606 GN=MAP4 PE=1 SV=3	MAP4	0.999999	0.00635991	96.946	2	KVDISK(1)VSSK	-0.085271	6	1.04725	1.05783	1.06665	0.833365	1.0687	0.926201	1.03016	0.940871	1.00494	1.03097	0.973915	1.01915	1.017	1.124	1.061	0.808	1.097	0.909	0.879	0.21914
P27816	998	K	Microtubule-associated protein 4 OS=Homo sapiens OX=9606 GN=MAP4 PE=1 SV=3	MAP4	1	0.000185124	113.46	2	K(1)VSYSHIQSK	1.3999	4		0.700855		0.937243	1.34264	1.01926	1.03016	0.940871	1.00494	1.03097	0.973915	1.01915		0.745		0.909	1.379	1	1.471
P27816	1007	K	Microtubule-associated protein 4 OS=Homo sapiens OX=9606 GN=MAP4 PE=1 SV=3	MAP4	1	5.77176e-13	168.05	2	VSYSHIQSK(1)CGSK	1.6211	9	1.48033	1.00037	0.940455	0.682838		0.896009	1.03016	0.940871	1.00494	1.03097	0.973915	1.01915	1.437	1.063	0.936	0.662		0.879	0.673	0.139643
P27816	933	K	Microtubule-associated protein 4 OS=Homo sapiens OX=9606 GN=MAP4 PE=1 SV=3	MAP4	1	1.28122e-10	156.14	2	LATNTSAPDLK(1)NVR	0.14547	5	0.772711	1.21443		0.826617	1.17093	1.01532	1.03016	0.940871	1.00494	1.03097	0.973915	1.01915	0.75	1.291		0.802	1.202	0.996	0.98	0.992498
P27816	852	K	Microtubule-associated protein 4 OS=Homo sapiens OX=9606 GN=MAP4 PE=1 SV=3	MAP4	1	0.00378756	63.212	2	MTAK(1)SVPADLSR	-2.203	3	0.882731		1.0132		1.10407		1.03016	0.940871	1.00494	1.03097	0.973915	1.01915	0.857		1.008		1.134		1.216
P27816	780	K	Microtubule-associated protein 4 OS=Homo sapiens OX=9606 GN=MAP4 PE=1 SV=3	MAP4	1	0.0263635	41.824	2	PIADAK(1)APEK	0.83965	1	1						1.03016	0.940871	1.00494	1.03097	0.973915	1.01915	0.971
P27816	769	K	Microtubule-associated protein 4 OS=Homo sapiens OX=9606 GN=MAP4 PE=1 SV=3	MAP4	0.999597	0.00607529	85.821	2	PSILPSK(1)DVKPK	-1.0868	7		0.989499	0.773771	0.775779	1.27247	1.18848	1.03016	0.940871	1.00494	1.03097	0.973915	1.01915		1.052	0.77	0.752	1.307	1.166	1.18	0.584222
P27816	991	K	Microtubule-associated protein 4 OS=Homo sapiens OX=9606 GN=MAP4 PE=1 SV=3	MAP4	1	0.00452931	81.335	2	QPAGK(1)VQIVSK	-0.43226	4		1.14271	1.00123		1.2604	0.595664	1.03016	0.940871	1.00494	1.03097	0.973915	1.01915		1.215	0.996		1.294	0.584	0.849	0.623816
P27816	997	K	Microtubule-associated protein 4 OS=Homo sapiens OX=9606 GN=MAP4 PE=1 SV=3	MAP4	1	0.0121467	81.32	2	VQIVSK(1)K	-0.48157	4		1.06391	0.980685	0.946375	1.00903		1.03016	0.940871	1.00494	1.03097	0.973915	1.01915		1.131	0.976	0.918	1.036		0.927	0.516318
P27816	938	K	Microtubule-associated protein 4 OS=Homo sapiens OX=9606 GN=MAP4 PE=1 SV=3	MAP4	1	0.000583561	90.761	2	SK(1)VGSTENIK	-1.3827	6	0.813014	1.2017	0.947241	0.893772	1.18371	0.960567	1.03016	0.940871	1.00494	1.03097	0.973915	1.01915	0.789	1.277	0.943	0.867	1.215	0.943	1.005	0.935907
P27816	986	K	Microtubule-associated protein 4 OS=Homo sapiens OX=9606 GN=MAP4 PE=1 SV=3	MAP4	1	5.02406e-11	143.22	2	TAGPIASAQK(1)QPAGK	-1.5001	4	1.1395	1.17901		0.726828	0.954661		1.03016	0.940871	1.00494	1.03097	0.973915	1.01915	1.106	1.253		0.705	0.98		0.714	0.186771
P27816	711	K	Microtubule-associated protein 4 OS=Homo sapiens OX=9606 GN=MAP4 PE=1 SV=3	MAP4	1	5.84474e-13	150.81	2	TKPLATTQPAK(1)TSTSK	-1.6042	5		1.09643	0.850163	0.959392	0.903318	1.19069	1.03016	0.940871	1.00494	1.03097	0.973915	1.01915		1.165	0.846	0.931	0.928	1.168	1.003	0.951138
P27816	890	K	Microtubule-associated protein 4 OS=Homo sapiens OX=9606 GN=MAP4 PE=1 SV=3	MAP4	1	0.000410644	88.921	2	VK(1)ATPMPSR	-0.68168	5		1.27515	0.733553	0.810848	1.16778	1.01266	1.03016	0.940871	1.00494	1.03097	0.973915	1.01915		1.355	0.73	0.786	1.199	0.994	0.953	0.957074
P27824	170	K	Calnexin OS=Homo sapiens OX=9606 GN=CANX PE=1 SV=2	CANX	1	4.18193e-06	85.081	3	LLSK(1)TPELNLDQFHDK	-0.16697	1				1			1.07195	0.959055	1.00118	1.07332	0.941948	0.952548				0.932
P28370	59	K	Probable global transcription activator SNF2L1 OS=Homo sapiens OX=9606 GN=SMARCA1 PE=1 SV=2	SMARCA1	1	0.000298597	72.042	2	EK(1)NVSSFQLK	4.6323	1			1				0.98738	1.10518	1.10156	0.865539	0.944013	0.996329			0.908
P28715	1071	K	DNA excision repair protein ERCC-5 OS=Homo sapiens OX=9606 GN=ERCC5 PE=1 SV=3	ERCC5	1	1.09017e-12	154.94	2	GITNTLEESSSLK(1)R	-1.9828	2		1.19739		0.802609
P28838	455	K	Cytosol aminopeptidase OS=Homo sapiens OX=9606 GN=LAP3 PE=1 SV=3	LAP3	1	3.32566e-37	227.95	2	QVVDCQLADVNNIGK(1)YR	0.96505	7	0.959615	1.25814	0.684022	1.23507	1.23973	0.623422	0.686354	1.19066	0.873592	0.830354	1.37065	1.04839	1.398	1.057	0.783	1.487	0.904	0.595	0.922	0.714411
P29034	27	K	Protein S100-A2 OS=Homo sapiens OX=9606 GN=S100A2 PE=1 SV=3	S100A2	1	0.000193516	95.311	2	YSCQEGDK(1)FK	0.79244	4		1.62693	0.622259		1.04227	0.708546	0.267369	1.51923		0.453922	1.75948			1.071			0.592		0.553
P29083	330	K	General transcription factor IIE subunit 1 OS=Homo sapiens OX=9606 GN=GTF2E1 PE=1 SV=2	GTF2E1	1	0.00330023	79.809	2	ALLIHEK(1)K	0.8585	3		0.994096		1.24343		0.762479	1.15617	0.920196	0.983003	0.965904	0.986769	0.987961		1.08		1.287		0.772	0.953
P29084	24	K	Transcription initiation factor IIE subunit beta OS=Homo sapiens OX=9606 GN=GTF2E2 PE=1 SV=1	GTF2E2	1	0.0218794	60.892	2	ALSTPVVEK(1)R	-1.0101	3		1.23871	0.920605	0.840681			1.08143	0.959035	0.978306	1.0017	1.01252	0.966999		1.292	0.941	0.839			0.751
P29084	271	K	Transcription initiation factor IIE subunit beta OS=Homo sapiens OX=9606 GN=GTF2E2 PE=1 SV=1	GTF2E2	1	3.43849e-09	135.5	2	FK(1)THNEHLAGVLK	-0.82715	10	0.576444	1.11816	0.880779		1.10369	1.32092	1.08143	0.959035	0.978306	1.0017	1.01252	0.966999	0.533	1.166	0.9		1.09	1.366	1.417	0.293273
P29373	31	K	Cellular retinoic acid-binding protein 2 OS=Homo sapiens OX=9606 GN=CRABP2 PE=1 SV=2	CRABP2	1	0.000329123	102.55	2	K(1)IAVAAASK	-0.098147	6	0.885678	1.11443	0.658326	1.15613	1.17351	1.01192	1.10278	0.9674	0.941841	1.10011	0.95806	0.929807	0.803	1.152	0.699	1.051	1.225	1.088	1.268	0.173839
P29401	232	K	Transketolase OS=Homo sapiens OX=9606 GN=TKT PE=1 SV=3	TKT	1	1.89084e-11	147.02	2	AFGQAK(1)HQPTAIIAK	-1.3252	5	1.06911	0.553238		1.85971	0.517936		0.932569	0.982235	0.917175	1.25298	0.970324	0.944716	1.146	0.563		1.484	0.534		1.181	0.884021
P29401	260	K	Transketolase OS=Homo sapiens OX=9606 GN=TKT PE=1 SV=3	TKT	1	0.00117446	58.916	2	ESWHGK(1)PLPK	-0.50298	2		0.908679		1.09132			0.932569	0.982235	0.917175	1.25298	0.970324	0.944716		0.925		0.871			0.942
P29401	319	K	Transketolase OS=Homo sapiens OX=9606 GN=TKT PE=1 SV=3	TKT	1	0.000877879	87.251	2	K(1)AYGQALAK	0.33869	5	1.38299	1.12216	0.580118	1.30612	0.608605		0.932569	0.982235	0.917175	1.25298	0.970324	0.944716	1.483	1.142	0.633	1.042	0.627		0.768	0.574887
P29401	102	K	Transketolase OS=Homo sapiens OX=9606 GN=TKT PE=1 SV=3	TKT	1	6.23742e-05	84.309	2	K(1)ISSDLDGHPVPK	1.0767	3		1.5907		0.411957	0.997346		0.932569	0.982235	0.917175	1.25298	0.970324	0.944716		1.619		0.329	1.028		0.419
P29401	543	K	Transketolase OS=Homo sapiens OX=9606 GN=TKT PE=1 SV=3	TKT	1	0.00330023	79.809	2	K(1)LILDSAR	1.0685	1				1			0.932569	0.982235	0.917175	1.25298	0.970324	0.944716				0.798
P29401	6	K	Transketolase OS=Homo sapiens OX=9606 GN=TKT PE=1 SV=3	TKT	1	1.84416e-06	141.29	2	MESYHK(1)PDQQK	-0.6497	5	0.786465	1.24854	0.535548	1.55963	0.869808		0.932569	0.982235	0.917175	1.25298	0.970324	0.944716	0.843	1.271	0.584	1.245	0.896		1.19	0.550796
P29590	476	K	Protein PML OS=Homo sapiens OX=9606 GN=PML PE=1 SV=3	PML	1	3.78806e-23	170.22	2	GPSYGEDVSNTTTAQK(1)R	0.5937	6	0.850194	1.23768	0.876145	0.924246	1.13229	0.979449	0.849816	1.12223	0.862564	0.92411	1.2637	0.97759	1	1.103	1.016	1	0.896	1.002	0.929	0.197181
P29590	490	K	Protein PML OS=Homo sapiens OX=9606 GN=PML PE=1 SV=3	PML	1	0.0076387	55.235	2	VIK(1)MESEEGK	0.14461	4		1.02119		0.797234	1.18158		0.849816	1.12223	0.862564	0.92411	1.2637	0.97759		0.91		0.863	0.935		0.988
P29692	59	K	Elongation factor 1-delta OS=Homo sapiens OX=9606 GN=EEF1D PE=1 SV=5	EEF1D	1	1.13671e-57	229.05	3	ENIQK(1)SLAGSSGPGASSGTSGDHGELVVR	-0.1659	6	1.19877	1.0464	0.724083	1.50629	0.765186	0.759262	1.02913	0.968545	1.02235	1.02058	0.946752	1.01264	1.165	1.08	0.708	1.476	0.808	0.75	1.027	0.996134
P29692	17	K	Elongation factor 1-delta OS=Homo sapiens OX=9606 GN=EEF1D PE=1 SV=5	EEF1D	1	0.00950902	75.243	2	FK(1)YDDAER	-0.83594	4	1.30031		0.702183	1.18066		0.816842	1.02913	0.968545	1.02235	1.02058	0.946752	1.01264	1.264		0.687	1.157		0.807	1.007	0.927761
P29692	117	K	Elongation factor 1-delta OS=Homo sapiens OX=9606 GN=EEF1D PE=1 SV=5	EEF1D	1	1.06461e-05	132.44	2	LNVLEK(1)SSPGHR	-0.052202	6	1.61441	0.848504	0.665154	1.31976	0.86037	0.691802	1.02913	0.968545	1.02235	1.02058	0.946752	1.01264	1.569	0.876	0.651	1.293	0.909	0.683	0.932	0.914798
P30041	209	K	Peroxiredoxin-6 OS=Homo sapiens OX=9606 GN=PRDX6 PE=1 SV=3	PRDX6	1	0.000931974	92.428	2	GVFTK(1)ELPSGK	0.7886	10	1.56719	0.95268	0.863753	1.06355	0.68912	0.863704	0.98047	0.971198	0.987905	0.984024	1.02064	1.05577	1.598	0.981	0.874	1.081	0.675	0.818	0.745	0.294818
P30046	33	K	D-dopachrome decarboxylase OS=Homo sapiens OX=9606 GN=DDT PE=1 SV=3	DDT	1	1.65501e-07	97.175	2	LCAAAASILGK(1)PADR	-0.89052	2		0.799942		1.20006			0.854948	1.02751	1.039	1.06365	1.05127	0.963618		0.779		1.128			1.448
P30101	289	K	Protein disulfide-isomerase A3 OS=Homo sapiens OX=9606 GN=PDIA3 PE=1 SV=4	PDIA3	1	0.041676	62.88	2	K(1)FLDAGHK	-1.8799	2	1.34978	0.65022					1.05023	0.949484	0.949532	1.02632	1.00577	1.01867	1.285	0.685
P30101	129	K	Protein disulfide-isomerase A3 OS=Homo sapiens OX=9606 GN=PDIA3 PE=1 SV=4	PDIA3	1	0.000850067	94.804	2	TADGIVSHLK(1)K	0.73932	6	1.60811	1.01802	0.615833	1.08838	0.941477	0.728184	1.05023	0.949484	0.949532	1.02632	1.00577	1.01867	1.531	1.072	0.649	1.06	0.936	0.715	0.834	0.64773
P30519	264	K	Heme oxygenase 2 OS=Homo sapiens OX=9606 GN=HMOX2 PE=1 SV=2	HMOX2	1	0.00341114	45.939	2	K(1)CPFYAAEQDK	-0.52693	2			0.790146			1.20985	1.10075	1.04243	1.00336	1.03071	0.947329	0.87541			0.787			1.382	1.756
P30622	14	K	CAP-Gly domain-containing linker protein 1 OS=Homo sapiens OX=9606 GN=CLIP1 PE=1 SV=2	CLIP1	0.999957	0.00012612	93.772	2	APTK(1)ILKPGSTALK	-0.37689	4		0.906865	1.1039		0.908416	1.08082	1.23163	0.894133	1.05173	1.02757	0.881024	0.913912		1.014	1.05		1.031	1.183	1.073	0.439248
P30622	24	K	CAP-Gly domain-containing linker protein 1 OS=Homo sapiens OX=9606 GN=CLIP1 PE=1 SV=2	CLIP1	0.994521	9.81049e-07	72.075	3	ILK(0.005)PGSTALK(0.995)TPTAVVAPVEK	-0.012684	2				1.0731		0.926895	1.23163	0.894133	1.05173	1.02757	0.881024	0.913912				1.044		1.014
P31943	200	K	Heterogeneous nuclear ribonucleoprotein H OS=Homo sapiens OX=9606 GN=HNRNPH1 PE=1 SV=4	HNRNPH1	1	0.000765348	119.06	2	K(1)LMAMQR	0.6179	6	0.902903	1.03941	0.960542	1.32996	0.886459	0.88072	0.921799	0.958288	1.02487	0.997388	1.02171	1.07594	0.98	1.085	0.937	1.333	0.868	0.819	1.006	0.921694
P63104	49	K	14-3-3 protein zeta/delta OS=Homo sapiens OX=9606 GN=YWHAZ PE=1 SV=1	YWHAZ	1	8.78318e-13	139.78	2	NLLSVAYK(1)NVVGAR	2.3526	6	1.79823	0.942402	0.390675	1.98526	0.434501	0.448938	1.07765	0.967641	1.02592	1.03147	0.92977	0.967548	1.669	0.974	0.381	1.925	0.467	0.464	0.944	0.847046
P31947	32	K	14-3-3 protein sigma OS=Homo sapiens OX=9606 GN=SFN PE=1 SV=1	SFN	1	0.000679666	75.5	2	GAVEK(1)GEELSCEER	-1.5488	1					1		0.919354	1.17173	1.04851	0.927783	0.99429	0.938333					1.006
P31947	49	K	14-3-3 protein sigma OS=Homo sapiens OX=9606 GN=SFN PE=1 SV=1	SFN	1	7.43322e-08	110.52	2	NLLSVAYK(1)NVVGGQR	0.031391	1				1			0.919354	1.17173	1.04851	0.927783	0.99429	0.938333				1.078
P31947	140	K	14-3-3 protein sigma OS=Homo sapiens OX=9606 GN=SFN PE=1 SV=1	SFN	1	0.000707759	76.85	2	YLAEVATGDDK(1)K	1.5215	4	0.980936	1.26559		0.775065	0.978412		0.919354	1.17173	1.04851	0.927783	0.99429	0.938333	1.067	1.08		0.835	0.984		0.847	0.176276
P31948	325	K	Stress-induced-phosphoprotein 1 OS=Homo sapiens OX=9606 GN=STIP1 PE=1 SV=1	STIP1	1	1.49786e-05	99.589	3	DAIHFYNK(1)SLAEHR	-0.59405	2	0.872688			1.12731			0.97425	0.974208	0.98715	1.03456	0.984823	1.04501	0.896			1.09			1.217
P31948	78	K	Stress-induced-phosphoprotein 1 OS=Homo sapiens OX=9606 GN=STIP1 PE=1 SV=1	STIP1	1	0.000661814	98.009	2	K(1)AAALEFLNR	-0.29176	1				1			0.97425	0.974208	0.98715	1.03456	0.984823	1.04501				0.967
P31948	73	K	Stress-induced-phosphoprotein 1 OS=Homo sapiens OX=9606 GN=STIP1 PE=1 SV=1	STIP1	0.999984	0.000698607	70.806	2	TVDLKPDWGK(1)GYSR	-1.2661	1				1			0.97425	0.974208	0.98715	1.03456	0.984823	1.04501				0.967
P31949	3	K	Protein S100-A11 OS=Homo sapiens OX=9606 GN=S100A11 PE=1 SV=2	S100A11	1	4.91931e-07	121.8	2	AK(1)ISSPTETER	-0.0080982	6	0.921905	1.27218	0.722607	0.953304	1.13538	0.994617	0.872876	1.13223	1.04881	0.848321	1.10591	0.991855	1.056	1.124	0.689	1.124	1.027	1.003	1.099	0.50308
P31949	55	K	Protein S100-A11 OS=Homo sapiens OX=9606 GN=S100A11 PE=1 SV=2	S100A11	1	3.2948e-05	166.66	2	NQK(1)DPGVLDR	0.14291	6	0.881336	1.22394	0.813715	1.04237	1.13699	0.901648	0.872876	1.13223	1.04881	0.848321	1.10591	0.991855	1.01	1.081	0.776	1.229	1.028	0.909	1.104	0.490595
P31949	27	K	Protein S100-A11 OS=Homo sapiens OX=9606 GN=S100A11 PE=1 SV=2	S100A11	1	9.46674e-07	126.21	2	YAGK(1)DGYNYTLSK	0.074172	6	1.16208	1.24348	0.774401	0.823466	1.02279	0.973785	0.872876	1.13223	1.04881	0.848321	1.10591	0.991855	1.331	1.098	0.738	0.971	0.925	0.982	0.909	0.720486
P32455	215	K	Guanylate-binding protein 1 OS=Homo sapiens OX=9606 GN=GBP1 PE=1 SV=2	GBP1	1	1.06839e-06	101.64	2	GTSQK(1)DETFNLPR	-1.7263	3		0.920049			1.40734	0.672608	0.719404	1.1618	0.829334	0.746167	1.46392	1.07938		0.792			0.961	0.623	1
P32969	174	K	60S ribosomal protein L9 OS=Homo sapiens OX=9606 GN=RPL9 PE=1 SV=1	RPL9	1	0.00908057	47.334	2	K(1)FLDGIYVSEK	-1.5283	2	1.30046		0.699537				1.024	1.03367	0.995284	1.00405	1.00054	0.942446	1.27		0.703
P33176	813	K	Kinesin-1 heavy chain OS=Homo sapiens OX=9606 GN=KIF5B PE=1 SV=1	KIF5B	1	1.74149e-18	166.59	2	K(1)SAEIDSDDTGGSAAQK	-0.79809	2	1.10502			0.894978			1.04174	0.942879	0.994327	1.10939	0.935334	0.97633	1.061			0.807			0.761
P34932	557	K	Heat shock 70 kDa protein 4 OS=Homo sapiens OX=9606 GN=HSPA4 PE=1 SV=4	HSPA4	1	6.20562e-36	215.93	2	AESEEMETSQAGSK(1)DK	0.33587	4	1.23893		1.09514	0.944226		0.721704	0.975969	0.989149	1.049	0.983171	0.949897	1.05282	1.269		1.044	0.96		0.685	0.711	0.21424
P34932	560	K	Heat shock 70 kDa protein 4 OS=Homo sapiens OX=9606 GN=HSPA4 PE=1 SV=4	HSPA4	1	0.000308802	126.82	2	K(1)MDQPPQAK	0.51783	6	0.816977	1.09022	0.917323	1.2787	1.05611	0.840665	0.975969	0.989149	1.049	0.983171	0.949897	1.05282	0.837	1.102	0.874	1.301	1.112	0.798	1.141	0.514257
P34932	477	K	Heat shock 70 kDa protein 4 OS=Homo sapiens OX=9606 GN=HSPA4 PE=1 SV=4	HSPA4	1	0.0374482	68.548	2	VTPQSDGSSSK(1)VK	-2.2878	4		0.578951		2.34875	0.635615	0.436682	0.975969	0.989149	1.049	0.983171	0.949897	1.05282		0.585		2.389	0.669	0.415	1.979
P35221	889	K	Catenin alpha-1 OS=Homo sapiens OX=9606 GN=CTNNA1 PE=1 SV=1	CTNNA1	1	3.30162e-07	110.58	2	K(1)HVNPVQALSEFK	-1.1181	6	1.09446	0.952732	0.81624	1.31725	0.921799	0.897519	0.946986	1.00857	1.01875	1.06027	0.96319	1.00223	1.156	0.945	0.801	1.242	0.957	0.896	1.067	0.676126
P35232	202	K	Prohibitin OS=Homo sapiens OX=9606 GN=PHB PE=1 SV=1	PHB	1	0.0263812	54.436	2	FVVEK(1)AEQQK	-0.038348	3		0.821617		1.46815	0.710232		1.08433	0.939043	0.994619	1.11279	0.911224	0.957994		0.875		1.319	0.779		1.199
P35232	208	K	Prohibitin OS=Homo sapiens OX=9606 GN=PHB PE=1 SV=1	PHB	1	0.00394229	58.889	2	K(1)AAIISAEGDSK	-0.99334	2	0.796766			1.20323			1.08433	0.939043	0.994619	1.11279	0.911224	0.957994	0.735			1.081			1.471
P35249	18	K	Replication factor C subunit 4 OS=Homo sapiens OX=9606 GN=RFC4 PE=1 SV=2	RFC4	1	6.09497e-11	128.97	2	GTSISTKPPLTK(1)DR	-0.39851	12	0.931383	1.07484	0.864851	1.08828	0.992563	1.04808	0.960925	0.966398	1.01138	0.939209	0.983577	1.13851	0.969	1.112	0.855	1.159	1.009	0.921	1.052	0.633755
P35251	318	K	Replication factor C subunit 1 OS=Homo sapiens OX=9606 GN=RFC1 PE=1 SV=4	RFC1	1	0.0076907	62.969	2	ASSK(1)LAIMK	-0.05338	6	0.84339	1.12157	0.876917	0.982749	1.03101	1.14436	0.807622	1.12974	0.987137	0.895742	1.11025	1.0695	1.044	0.993	0.888	1.097	0.929	1.07	1.058	0.468061
P35251	5	K	Replication factor C subunit 1 OS=Homo sapiens OX=9606 GN=RFC1 PE=1 SV=4	RFC1	1	0.0015323	72.042	2	K(1)FFGVIPSGK	1.6236	3		1.21056	0.880445		0.908999		0.807622	1.12974	0.987137	0.895742	1.11025	1.0695		1.072	0.892		0.819		0.834
P35251	88	K	Replication factor C subunit 1 OS=Homo sapiens OX=9606 GN=RFC1 PE=1 SV=4	RFC1	0.99621	0.00496511	110.44	3	K(0.004)PPEK(0.996)LPVSSKPGK	0.94148	1	1						0.807622	1.12974	0.987137	0.895742	1.11025	1.0695	1.238
P35251	97	K	Replication factor C subunit 1 OS=Homo sapiens OX=9606 GN=RFC1 PE=1 SV=4	RFC1	0.995962	0.000426774	87.895	2	LPVSSK(0.004)PGK(0.996)ISR	0.4318	4		1.08378	0.869809		1.03461	1.0118	0.807622	1.12974	0.987137	0.895742	1.11025	1.0695		0.959	0.881		0.932	0.946	1.021	0.6697
P35268	107	K	60S ribosomal protein L22 OS=Homo sapiens OX=9606 GN=RPL22 PE=1 SV=2	RPL22	1	0.0231567	40.861	2	VVANSK(1)ESYELR	-2.7586	1			1				0.964333	0.903774	1.0673	0.905387	0.976203	1.183			0.937
P35269	407	K	General transcription factor IIF subunit 1 OS=Homo sapiens OX=9606 GN=GTF2F1 PE=1 SV=2	GTF2F1	1	0.000272565	123.5	2	AAASK(1)LEQGK	-0.40924	6	0.999112	0.960575	1.00898	1.21734	0.859799	0.954198	1.0264	0.950653	0.988143	0.990543	1.01402	1.03024	0.973	1.01	1.021	1.229	0.848	0.926	1	0.914056
P35269	421	K	General transcription factor IIF subunit 1 OS=Homo sapiens OX=9606 GN=GTF2F1 PE=1 SV=2	GTF2F1	1	0.00104006	75.243	2	VSEMPAAK(1)R	-0.20252	6	0.723505	1.19473	0.861974	0.985918	0.994481	1.23939	1.0264	0.950653	0.988143	0.990543	1.01402	1.03024	0.705	1.257	0.872	0.995	0.981	1.203	1.122	0.484469
P35579	1219	K	Myosin-9 OS=Homo sapiens OX=9606 GN=MYH9 PE=1 SV=4	MYH9	1	0.0076907	62.969	2	AK(1)QTLENER	2.0627	1					1		1.01436	0.984418	1.00865	0.937765	1.04496	1.00985					0.957
P35579	8	K	Myosin-9 OS=Homo sapiens OX=9606 GN=MYH9 PE=1 SV=4	MYH9	1	1.71686e-09	123.92	2	AQQAADK(1)YLYVDK	-0.35938	6	1.33498	1.49053	0.7732	1.12787	0.957794	0.31563	1.01436	0.984418	1.00865	0.937765	1.04496	1.00985	1.316	1.514	0.767	1.203	0.917	0.313	0.676	0.342123
P35579	1518	K	Myosin-9 OS=Homo sapiens OX=9606 GN=MYH9 PE=1 SV=4	MYH9	1	1.26249e-05	121.71	2	DDVGK(1)SVHELEK	-1.0506	5	1.51014	1.36376	0.372306		0.977592	0.7762	1.01436	0.984418	1.00865	0.937765	1.04496	1.00985	1.489	1.385	0.369		0.936	0.769	0.789	0.908914
P35579	1669	K	Myosin-9 OS=Homo sapiens OX=9606 GN=MYH9 PE=1 SV=4	MYH9	1	0.00102961	87.895	2	EEILAQAK(1)ENEK	0.047485	1						1	1.01436	0.984418	1.00865	0.937765	1.04496	1.00985						0.99
P35579	1477	K	Myosin-9 OS=Homo sapiens OX=9606 GN=MYH9 PE=1 SV=4	MYH9	0.999999	0.000380055	101.45	2	EKETK(1)ALSLAR	0.12783	5	1.66512	0.975256	0.694674		0.883203	0.78175	1.01436	0.984418	1.00865	0.937765	1.04496	1.00985	1.642	0.991	0.689		0.845	0.774	0.731	0.499181
P35579	860	K	Myosin-9 OS=Homo sapiens OX=9606 GN=MYH9 PE=1 SV=4	MYH9	1	0.000336216	90.761	2	EK(1)QLAAENR	-1.0405	4	1.08374	0.860409		0.954706	1.10115		1.01436	0.984418	1.00865	0.937765	1.04496	1.00985	1.068	0.874		1.018	1.054		1.067	0.564192
P35579	1173	K	Myosin-9 OS=Homo sapiens OX=9606 GN=MYH9 PE=1 SV=4	MYH9	1	0.000364782	82.716	2	EQEVNILK(1)K	0.41862	2	1.26529	0.734706					1.01436	0.984418	1.00865	0.937765	1.04496	1.00985	1.247	0.746
P35579	1918	K	Myosin-9 OS=Homo sapiens OX=9606 GN=MYH9 PE=1 SV=4	MYH9	1	0.028696	58.286	2	EVSSLK(1)NK	-0.092072	2				1.1569		0.843102	1.01436	0.984418	1.00865	0.937765	1.04496	1.00985				1.234		0.835
P35579	560	K	Myosin-9 OS=Homo sapiens OX=9606 GN=MYH9 PE=1 SV=4	MYH9	0.999526	0.0116675	84.699	2	FQKPK(1)QLK	-0.04483	6	0.897921	1.17476	0.842078	1.07821	1.11803	0.889006	1.01436	0.984418	1.00865	0.937765	1.04496	1.00985	0.885	1.193	0.835	1.15	1.07	0.88	1.064	0.641746
P35579	1724	K	Myosin-9 OS=Homo sapiens OX=9606 GN=MYH9 PE=1 SV=4	MYH9	1	0.00926263	53.878	2	GALALEEK(1)R	-0.74956	1			1				1.01436	0.984418	1.00865	0.937765	1.04496	1.00985			0.991
P35579	1404	K	Myosin-9 OS=Homo sapiens OX=9606 GN=MYH9 PE=1 SV=4	MYH9	1	0.000458393	88.24	2	HEEK(1)VAAYDK	1.1788	6	1.28279	0.842532	0.707923	0.912161	1.23062	1.02398	1.01436	0.984418	1.00865	0.937765	1.04496	1.00985	1.265	0.856	0.702	0.973	1.178	1.014	1.121	0.481303
P35579	1357	K	Myosin-9 OS=Homo sapiens OX=9606 GN=MYH9 PE=1 SV=4	MYH9	1	1.73624e-05	69.369	3	HNLEK(1)QIATLHAQVADMK	-0.3039	3		1.1692		1.01688	0.813913		1.01436	0.984418	1.00865	0.937765	1.04496	1.00985		1.188		1.084	0.779		0.784
P35579	202	K	Myosin-9 OS=Homo sapiens OX=9606 GN=MYH9 PE=1 SV=4	MYH9	1	0.000439772	146.27	2	K(1)DQGELER	1.2736	6	0.823541	0.982749	0.8584	1.14035	1.24329	0.951672	1.01436	0.984418	1.00865	0.937765	1.04496	1.00985	0.812	0.998	0.851	1.216	1.19	0.942	1.258	0.0917973
P35579	1445	K	Myosin-9 OS=Homo sapiens OX=9606 GN=MYH9 PE=1 SV=4	MYH9	1	0.000144502	127.93	2	K(1)FDQLLAEEK	1.0337	4		1.02287		1.30893	0.894416	0.773783	1.01436	0.984418	1.00865	0.937765	1.04496	1.00985		1.039		1.396	0.856	0.766	0.968
P35579	1454	K	Myosin-9 OS=Homo sapiens OX=9606 GN=MYH9 PE=1 SV=4	MYH9	0.999912	0.0883588	44.045	2	KFDQLLAEEK(1)TISAK	0.71001	1					1		1.01436	0.984418	1.00865	0.937765	1.04496	1.00985					0.957
P35579	1459	K	Myosin-9 OS=Homo sapiens OX=9606 GN=MYH9 PE=1 SV=4	MYH9	1	0.0439881	43.272	2	TISAK(1)YAEER	-0.28887	1		1					1.01436	0.984418	1.00865	0.937765	1.04496	1.00985		1.016
P35579	1937	K	Myosin-9 OS=Homo sapiens OX=9606 GN=MYH9 PE=1 SV=4	MYH9	1	7.46118e-05	85.081	2	K(1)GAGDGSDEEVDGK	-0.83936	2		1.32677		0.673228			1.01436	0.984418	1.00865	0.937765	1.04496	1.00985		1.348		0.718			0.533
P35579	1249	K	Myosin-9 OS=Homo sapiens OX=9606 GN=MYH9 PE=1 SV=4	MYH9	1	4.67793e-08	163.59	2	K(1)VEAQLQELQVK	0.5092	12	1.55397	0.853077	0.636797	1.59369	0.737464	0.625003	1.01436	0.984418	1.00865	0.937765	1.04496	1.00985	1.532	0.867	0.631	1.699	0.706	0.619	0.998	0.926199
P35579	1372	K	Myosin-9 OS=Homo sapiens OX=9606 GN=MYH9 PE=1 SV=4	MYH9	1	3.58595e-08	84.58	2	K(1)MEDSVGCLETAEEVK	2.9328	1	1						1.01436	0.984418	1.00865	0.937765	1.04496	1.00985	0.986
P35579	910	K	Myosin-9 OS=Homo sapiens OX=9606 GN=MYH9 PE=1 SV=4	MYH9	1	2.26452e-09	128.57	3	K(1)QELEEICHDLEAR	-1.3674	7	1.30397	1.40464	0.840502	0.993206	0.823327	0.634355	1.01436	0.984418	1.00865	0.937765	1.04496	1.00985	1.286	1.427	0.833	1.059	0.788	0.628	0.698	0.185965
P35579	1845	K	Myosin-9 OS=Homo sapiens OX=9606 GN=MYH9 PE=1 SV=4	MYH9	1	5.58398e-05	103.76	2	LK(1)DVLLQVDDER	-0.11568	6	1.5044	1.41191	0.454674	1.0695	0.944442	0.615073	1.01436	0.984418	1.00865	0.937765	1.04496	1.00985	1.483	1.434	0.451	1.14	0.904	0.609	0.788	0.759902
P35579	1802	K	Myosin-9 OS=Homo sapiens OX=9606 GN=MYH9 PE=1 SV=4	MYH9	1	9.40932e-05	99.174	2	LQEMEGTVK(1)SK	1.6293	6	1.41168	1.02501	0.784213	1.24714	0.766855	0.765097	1.01436	0.984418	1.00865	0.937765	1.04496	1.00985	1.392	1.041	0.777	1.33	0.734	0.758	0.879	0.613862
P35579	1024	K	Myosin-9 OS=Homo sapiens OX=9606 GN=MYH9 PE=1 SV=4	MYH9	1	1.40729e-09	181.44	2	NK(1)HEAMITDLEER	-0.11647	5	1.90229	0.804916			0.530848	0.761946	1.01436	0.984418	1.00865	0.937765	1.04496	1.00985	1.875	0.818			0.508	0.755	0.469	0.270636
P35579	299	K	Myosin-9 OS=Homo sapiens OX=9606 GN=MYH9 PE=1 SV=4	MYH9	1	9.09055e-05	105.36	2	TDLLLEPYNK(1)YR	0.38223	4	1.95082	0.991913	0.254142	0.803127			1.01436	0.984418	1.00865	0.937765	1.04496	1.00985	1.923	1.008	0.252	0.856			0.807
P35579	1274	K	Myosin-9 OS=Homo sapiens OX=9606 GN=MYH9 PE=1 SV=4	MYH9	1	0.00145182	78.816	2	TELADK(1)VTK	0.18259	5	1.35803	1.17766		0.64992	0.891012	0.923369	1.01436	0.984418	1.00865	0.937765	1.04496	1.00985	1.339	1.196		0.693	0.853	0.914	0.647	0.03156
P35579	1793	K	Myosin-9 OS=Homo sapiens OX=9606 GN=MYH9 PE=1 SV=4	MYH9	1	0.00116178	87.895	2	VK(1)LQEMEGTVK	-0.56646	6	1.69599	0.866822	0.809759	1.07466	0.706912	0.84586	1.01436	0.984418	1.00865	0.937765	1.04496	1.00985	1.672	0.881	0.803	1.146	0.676	0.838	0.793	0.510075
P35579	1240	K	Myosin-9 OS=Homo sapiens OX=9606 GN=MYH9 PE=1 SV=4	MYH9	1	2.82692e-05	108.93	2	VLLQGK(1)GDSEHK	0.58129	5	1.78332	1.00459		0.49934	0.882183	0.830565	1.01436	0.984418	1.00865	0.937765	1.04496	1.00985	1.758	1.02		0.532	0.844	0.822	0.527	0.112167
P35579	1806	K	Myosin-9 OS=Homo sapiens OX=9606 GN=MYH9 PE=1 SV=4	MYH9	1	0.0113006	68.49	2	YK(1)ASITALEAK	-0.10493	4	1.45567	0.903332			0.823494	0.817501	1.01436	0.984418	1.00865	0.937765	1.04496	1.00985	1.435	0.918			0.788	0.81	0.679	0.246882
P35610	45	K	Sterol O-acyltransferase 1 OS=Homo sapiens OX=9606 GN=SOAT1 PE=1 SV=3	SOAT1	1	0.000640061	77.072	2	IDIK(1)QLIAK	-0.60567	1				1			1.09895	1.11864	1.17382	0.739467	0.943995	0.925125				1.352
P35637	365	K	RNA-binding protein FUS OS=Homo sapiens OX=9606 GN=FUS PE=1 SV=1	FUS	1	4.15037e-14	147.02	2	EFSGNPIK(1)VSFATR	0.33304	1				1			0.946959	0.993995	1.08095	0.903864	0.990156	1.08407				1.106
P35637	510	K	RNA-binding protein FUS OS=Homo sapiens OX=9606 GN=FUS PE=1 SV=1	FUS	1	0.0414818	56.202	2	GGFGPGK(1)MDSR	-0.010359	1			1				0.946959	0.993995	1.08095	0.903864	0.990156	1.08407			0.925
P35637	316	K	RNA-binding protein FUS OS=Homo sapiens OX=9606 GN=FUS PE=1 SV=1	FUS	1	3.75564e-07	119.43	2	K(1)TGQPMINLYTDR	0.48292	6	0.945788	1.03639	0.92143	1.19185	0.962325	0.942209	0.946959	0.993995	1.08095	0.903864	0.990156	1.08407	0.999	1.043	0.852	1.319	0.972	0.869	1.092	0.615014
P35637	312	K	RNA-binding protein FUS OS=Homo sapiens OX=9606 GN=FUS PE=1 SV=1	FUS	1	0.038015	60.892	2	QIGIIK(1)TNK	-0.19579	4			1.10737	1.31725	0.993127	0.582248	0.946959	0.993995	1.08095	0.903864	0.990156	1.08407			1.024	1.457	1.003	0.537	0.976
P35658	682	K	Nuclear pore complex protein Nup214 OS=Homo sapiens OX=9606 GN=NUP214 PE=1 SV=2	NUP214	1	6.72751e-06	83.474	2	PGSPQAK(1)SLQPAVAEK	-2.0855	1				1			1.05003	0.944603	0.941504	1.0697	0.96104	1.03312				0.935
P36405	11	K	ADP-ribosylation factor-like protein 3 OS=Homo sapiens OX=9606 GN=ARL3 PE=1 SV=2	ARL3	1	0.000207744	97.277	2	LK(1)SAPDQEVR	-1.0592	5	0.973553	0.910104	0.841249	1.40247		0.872627	1.07059	0.919043	0.944801	1.16965	0.896024	0.999897	0.909	0.99	0.89	1.199		0.873	1.114	0.496566
P36578	364	K	60S ribosomal protein L4 OS=Homo sapiens OX=9606 GN=RPL4 PE=1 SV=5	RPL4	1	2.69748e-05	93.162	2	AAAAAAALQAK(1)SDEK	-0.70798	1	1						1.11316	0.781768	1.00397	1.14894	0.946649	1.00551	0.898
P37108	43	K	Signal recognition particle 14 kDa protein OS=Homo sapiens OX=9606 GN=SRP14 PE=1 SV=2	SRP14	1	3.04912e-45	248.59	2	K(1)GTVEGFEPADNK	-0.026898	6	0.924309	0.983218	0.981629	1.22883	0.961167	0.920845	0.970779	0.925715	1.04641	0.992138	0.926076	1.13888	0.952	1.062	0.938	1.239	1.038	0.809	1.045	0.823413
P37802	17	K	Transgelin-2 OS=Homo sapiens OX=9606 GN=TAGLN2 PE=1 SV=3	TAGLN2	1	0.000945472	133.98	2	EVQQK(1)IEK	0.44228	6	0.804508	1.11291	0.930426	1.14947	1.02432	0.978369	0.861807	1.03724	1.03032	0.860619	1.06142	1.14859	0.934	1.073	0.903	1.336	0.965	0.852	1.084	0.677273
P37802	79	K	Transgelin-2 OS=Homo sapiens OX=9606 GN=TAGLN2 PE=1 SV=3	TAGLN2	1	0.00032491	88.181	2	K(1)IQASTMAFK	1.2831	6	1.228	1.05113	0.730285	1.21984	0.863771	0.906969	0.861807	1.03724	1.03032	0.860619	1.06142	1.14859	1.425	1.013	0.709	1.417	0.814	0.79	0.96	0.895565
P37802	171	K	Transgelin-2 OS=Homo sapiens OX=9606 GN=TAGLN2 PE=1 SV=3	TAGLN2	1	1.17569e-09	157.7	3	NFSDNQLQEGK(1)NVIGLQMGTNR	0.74917	5	1.69337	1.62664	0.333241	0.760867	0.585886		0.861807	1.03724	1.03032	0.860619	1.06142	1.14859	1.965	1.568	0.323	0.884	0.552		0.559	0.668067
P37837	286	K	Transaldolase OS=Homo sapiens OX=9606 GN=TALDO1 PE=1 SV=2	TALDO1	1	2.74143e-13	141.87	2	AAQASDLEK(1)IHLDEK	-1.4227	1				1			1.06188	0.891156	0.95106	1.19444	0.911366	0.990093				0.837
P38159	217	K	RNA-binding motif protein, X chromosome OS=Homo sapiens OX=9606 GN=RBMX PE=1 SV=3	RBMX	1	3.95745e-10	140.57	2	DDGYSTK(1)DSYSSR	0.64673	6	1.15367	1.04159	0.54672	1.19305	0.946957	1.11801	1.00963	0.959871	1.01228	1.06648	0.948488	1.00326	1.143	1.085	0.54	1.119	0.998	1.114	1.167	0.446206
P38159	150	K	RNA-binding motif protein, X chromosome OS=Homo sapiens OX=9606 GN=RBMX PE=1 SV=3	RBMX	1	0.0041671	71.575	3	GPLPVK(1)RGPPPR	0.38059	8	1.11453	0.95352	0.798024	1.36386	0.879872	0.890194	1.00963	0.959871	1.01228	1.06648	0.948488	1.00326	1.104	0.993	0.788	1.279	0.928	0.887	1.072	0.687341
P38159	163	K	RNA-binding motif protein, X chromosome OS=Homo sapiens OX=9606 GN=RBMX PE=1 SV=3	RBMX	1	0.00072108	58.338	3	SGGPPPK(1)RSAPSGPVR	0.97401	2	0.996621					1.00338	1.00963	0.959871	1.01228	1.06648	0.948488	1.00326	0.987					1	1.013
P38432	405	K	Coilin OS=Homo sapiens OX=9606 GN=COIL PE=1 SV=1	COIL	1	0.00039865	104.39	2	EENLFSWK(1)GAK	6.1503	2				1.56103		0.438968	0.831329	1.07888	1.08201	0.901881	1.06658	1.03933				1.731		0.422
P38432	209	K	Coilin OS=Homo sapiens OX=9606 GN=COIL PE=1 SV=1	COIL	1	0.000267845	83.438	2	VQAVK(1)DWANQR	-1.5019	5		1.44782	0.961605	0.672204	1.06898	0.84939	0.831329	1.07888	1.08201	0.901881	1.06658	1.03933		1.342	0.889	0.745	1.002	0.817	0.766	0.276257
P38919	152	K	Eukaryotic initiation factor 4A-III OS=Homo sapiens OX=9606 GN=EIF4A3 PE=1 SV=4	EIF4A3	1	1.13371e-05	81.908	3	K(1)LDYGQHVVAGTPGR	0.9818	4	1.01734	0.89138		1.09128			0.94444	0.996064	1.00519	1.00858	1.02637	1.01936	1.077	0.895		1.082			1.097
P38919	19	K	Eukaryotic initiation factor 4A-III OS=Homo sapiens OX=9606 GN=EIF4A3 PE=1 SV=4	EIF4A3	1	0.0294866	43.272	2	LLK(1)EEDMTK	-1.1905	1			1				0.94444	0.996064	1.00519	1.00858	1.02637	1.01936			0.995
P39019	77	K	40S ribosomal protein S19 OS=Homo sapiens OX=9606 GN=RPS19 PE=1 SV=2	RPS19	1	0.000293598	84.309	2	GGAGVGSMTK(1)IYGGR	-1.5843	2			0.799389			1.20061	1.00467	0.963019	1.04664	1.0126	0.98699	0.986081			0.764			1.218	1.594
P39023	393	K	60S ribosomal protein L3 OS=Homo sapiens OX=9606 GN=RPL3 PE=1 SV=2	RPL3	1	0.0564047	51.456	2	AFMGPLK(1)K	-0.45012	1						1	1.02388	0.955708	1.01336	1.06692	0.965578	0.974556						1.026
P39023	66	K	60S ribosomal protein L3 OS=Homo sapiens OX=9606 GN=RPL3 PE=1 SV=2	RPL3	1	0.0348938	54.584	2	EVDRPGSK(1)VNK	-0.20552	1				1			1.02388	0.955708	1.01336	1.06692	0.965578	0.974556				0.937
P39023	373	K	60S ribosomal protein L3 OS=Homo sapiens OX=9606 GN=RPL3 PE=1 SV=2	RPL3	1	3.10387e-11	152.17	2	FIDTTSK(1)FGHGR	-0.18296	6	0.9222	1.03257	0.95349	0.964226	1.04945	1.07807	1.02388	0.955708	1.01336	1.06692	0.965578	0.974556	0.901	1.08	0.941	0.904	1.087	1.106	1.06	0.536362
P39023	120	K	60S ribosomal protein L3 OS=Homo sapiens OX=9606 GN=RPL3 PE=1 SV=2	RPL3	1	0.0139533	88.201	2	FYK(1)NWHK	-0.43952	5		1.14042	0.871179	1.14762	0.921566	0.919219	1.02388	0.955708	1.01336	1.06692	0.965578	0.974556		1.193	0.86	1.076	0.954	0.943	0.965	0.870654
P39023	366	K	60S ribosomal protein L3 OS=Homo sapiens OX=9606 GN=RPL3 PE=1 SV=2	RPL3	1	0.00533954	64.906	2	IDLK(1)FIDTTSK	-3.7624	2				1.19698		0.803016	1.02388	0.955708	1.01336	1.06692	0.965578	0.974556				1.122		0.824
P39023	286	K	60S ribosomal protein L3 OS=Homo sapiens OX=9606 GN=RPL3 PE=1 SV=2	RPL3	1	0.00602445	79.059	2	IYK(1)IGQGYLIK	0.40646	4	1.0074	1.0207		1.15378		0.818113	1.02388	0.955708	1.01336	1.06692	0.965578	0.974556	0.984	1.068		1.081		0.839	0.936	0.635759
P39023	250	K	60S ribosomal protein L3 OS=Homo sapiens OX=9606 GN=RPL3 PE=1 SV=2	RPL3	1	3.31468e-06	99.855	2	K(1)VACIGAWHPAR	-0.60371	6	0.97675	1.37229	1.15273	0.750205	0.869705	0.878325	1.02388	0.955708	1.01336	1.06692	0.965578	0.974556	0.954	1.436	1.138	0.703	0.901	0.901	0.71	0.0812296
P39023	300	K	60S ribosomal protein L3 OS=Homo sapiens OX=9606 GN=RPL3 PE=1 SV=2	RPL3	1	2.79903e-13	146.37	2	LIK(1)NNASTDYDLSDK	-0.33324	6	1.30167	1.25744	0.792767	1.04492	0.912005	0.691202	1.02388	0.955708	1.01336	1.06692	0.965578	0.974556	1.271	1.316	0.782	0.979	0.945	0.709	0.782	0.30695
P39023	356	K	60S ribosomal protein L3 OS=Homo sapiens OX=9606 GN=RPL3 PE=1 SV=2	RPL3	1	0.000703389	126.2	2	SLLVQTK(1)R	-0.18055	6	1.1656	1.21866	0.798666	1.04203	0.815349	0.959697	1.02388	0.955708	1.01336	1.06692	0.965578	0.974556	1.138	1.275	0.788	0.977	0.844	0.985	0.877	0.499362
P39687	238	K	Acidic leucine-rich nuclear phosphoprotein 32 family member A OS=Homo sapiens OX=9606 GN=ANP32A PE=1 SV=1	ANP32A	1	5.81139e-54	277.76	2	K(1)REPEDEGEDDD	0.42425	6	0.749313	0.996811	0.933639	1.52028	0.93879	0.861171	1.03423	0.971629	1.03145	1.08817	0.865106	1.00941	0.725	1.026	0.905	1.397	1.085	0.853	1.256	0.281475
P39748	201	K	Flap endonuclease 1 OS=Homo sapiens OX=9606 GN=FEN1 PE=1 SV=1	FEN1	1	9.70591e-05	99.855	2	K(1)LPIQEFHLSR	-1.166	8	1.32877	0.636295	0.380993	2.01615	0.715623	0.922169	0.87229	1.11922	1.01965	0.888018	1.06247	1.03835	1.523	0.569	0.374	2.27	0.674	0.888	1.554	0.438067
P39748	345	K	Flap endonuclease 1 OS=Homo sapiens OX=9606 GN=FEN1 PE=1 SV=1	FEN1	1	3.29577e-08	104.49	2	LDDFFK(1)VTGSLSSAK	0.78716	6	1.06272	1.50366	0.524761	1.86855	0.660946	0.379353	0.87229	1.11922	1.01965	0.888018	1.06247	1.03835	1.218	1.343	0.515	2.104	0.622	0.365	1.005	0.768829
P39748	109	K	Flap endonuclease 1 OS=Homo sapiens OX=9606 GN=FEN1 PE=1 SV=1	FEN1	1	3.11494e-19	93.517	3	RAEAEK(1)QLQQAQAAGAEQEVEK	0.4894	3		1.24403	0.601095		1.15487		0.87229	1.11922	1.01965	0.888018	1.06247	1.03835		1.112	0.59		1.087		1.277
P40121	127	K	Macrophage-capping protein OS=Homo sapiens OX=9606 GN=CAPG PE=1 SV=2	CAPG	1	1.71898e-10	92.319	3	YQEGGVESAFHK(1)TSTGAPAAIK	0.92161	5	0.83362		0.776345	1.53073	0.930139	0.92917	1.32359	0.912954	0.944998	1.05149	0.818283	0.948687	0.63		0.822	1.456	1.137	0.979	1.64	0.0717829
P40227	5	K	T-complex protein 1 subunit zeta OS=Homo sapiens OX=9606 GN=CCT6A PE=1 SV=3	CCT6A	1	0.0141247	67.464	2	AAVK(1)TLNPK	-2.5567	1						1	0.991447	0.977405	1.03673	0.954097	1.03132	1.009						0.991
P40227	10	K	T-complex protein 1 subunit zeta OS=Homo sapiens OX=9606 GN=CCT6A PE=1 SV=3	CCT6A	1	0.0246022	72.365	2	TLNPK(1)AEVAR	1.8758	1		1					0.991447	0.977405	1.03673	0.954097	1.03132	1.009		1.023
P40227	199	K	T-complex protein 1 subunit zeta OS=Homo sapiens OX=9606 GN=CCT6A PE=1 SV=3	CCT6A	1	0.00123707	71.066	2	HK(1)SETDTSLIR	-0.074085	3		0.882368		1.52171		0.595919	0.991447	0.977405	1.03673	0.954097	1.03132	1.009		0.903		1.595		0.591	1.21
P40692	123	K	DNA mismatch repair protein Mlh1 OS=Homo sapiens OX=9606 GN=MLH1 PE=1 SV=1	MLH1	1	0.00742215	65.156	2	TADGK(1)CAYR	0.84833	6	0.812122	0.766809	0.963036	1.44909	0.980888	1.02805	0.878814	1.1106	1.10978	0.769534	1.15496	0.97631	0.924	0.69	0.868	1.883	0.849	1.053	1.525	0.217963
P40926	301	K	Malate dehydrogenase, mitochondrial OS=Homo sapiens OX=9606 GN=MDH2 PE=1 SV=3	MDH2	1	0.0209268	52.591	2	GIEK(1)NLGIGK	0.023067	1	1						1.02586	0.956358	0.961371	1.15903	0.966234	0.931145	0.975
P40926	307	K	Malate dehydrogenase, mitochondrial OS=Homo sapiens OX=9606 GN=MDH2 PE=1 SV=3	MDH2	1	2.1375e-07	159.12	2	NLGIGK(1)VSSFEEK	-0.59849	6	1.54977	1.25781	0.768326	0.891752	0.885539	0.646802	1.02586	0.956358	0.961371	1.15903	0.966234	0.931145	1.511	1.315	0.799	0.769	0.916	0.695	0.657	0.134646
P40926	239	K	Malate dehydrogenase, mitochondrial OS=Homo sapiens OX=9606 GN=MDH2 PE=1 SV=3	MDH2	1	0.000415679	92.445	2	IQEAGTEVVK(1)AK	1.2375	5	1.21844	1.20266	0.698272	1.00269	0.877948		1.02586	0.956358	0.961371	1.15903	0.966234	0.931145	1.188	1.258	0.726	0.865	0.909		0.839	0.560772
P41091	266	K	Eukaryotic translation initiation factor 2 subunit 3 OS=Homo sapiens OX=9606 GN=EIF2S3 PE=1 SV=3	EIF2S3	1	0.000276982	90.156	2	SFDVNK(1)PGCEVDDLK	0.50747	5	1.13914	1.97654	0.721469	0.822032		0.340819	1.07862	0.957112	1.01551	1.06047	0.929937	0.958356	1.056	2.065	0.71	0.775		0.356	0.443	0.209521
P41229	235	K	Lysine-specific demethylase 5C OS=Homo sapiens OX=9606 GN=KDM5C PE=1 SV=2	KDM5C	1	0.000573141	79.809	2	K(1)LQIYGAGPK	0.68446	4		1.69098	0.617875		0.691405	0.999735	0.615319	1.25761	1.07367	0.843233	1.06139	1.14877		1.345	0.575		0.651	0.87	0.792	0.761741
Q6NXS1	12	K	Protein phosphatase inhibitor 2 family member B OS=Homo sapiens OX=9606 GN=PPP1R2B PE=1 SV=2	PPP1R2B	1	2.35209e-11	150.44	2	AASTASHRPIK(1)GILK	-0.34399	12	1.20958	0.927341	0.96778	1.11454	0.828764	0.951996
Q6NXS1	145	K	Protein phosphatase inhibitor 2 family member B OS=Homo sapiens OX=9606 GN=PPP1R2B PE=1 SV=2	PPP1R2B	1	0.0001049	120.65	2	K(1)LHYNEGLNIK	-0.57942	3			1.06544	0.816707		1.11785
Q6NXS1	18	K	Protein phosphatase inhibitor 2 family member B OS=Homo sapiens OX=9606 GN=PPP1R2B PE=1 SV=2	PPP1R2B	1	8.45866e-56	228.97	2	NK(1)TSTTSSMVASAEQPR	0.58122	6	1.0791	0.995813	0.910385	1.22341	0.612656	1.17864
P41250	108	K	Glycine--tRNA ligase OS=Homo sapiens OX=9606 GN=GARS1 PE=1 SV=3	GARS1	1	0.000585461	92.445	2	VLEAK(1)ELALQPK	0.33977	1				1			1.35925	0.827451	0.931373	1.31119	0.772044	0.798694				0.763
P41252	606	K	Isoleucine--tRNA ligase, cytoplasmic OS=Homo sapiens OX=9606 GN=IARS1 PE=1 SV=2	IARS1	1	0.000883825	85.821	2	K(1)NYPDPVSIIQK	-0.81128	1				1			1.21181	0.869989	0.979592	1.21441	0.825433	0.898772				0.823
P42166	269	K	Lamina-associated polypeptide 2, isoform alpha OS=Homo sapiens OX=9606 GN=TMPO PE=1 SV=2	TMPO	1	0.000294114	95.311	2	GQLQK(1)LASER	0.97008	5		1.23618	1.00358	0.52324	1.05551	1.18149	0.933327	1.06651	1.11623	0.846688	0.999605	1.03765		1.159	0.899	0.618	1.056	1.139	0.911	0.683774
P42166	356	K	Lamina-associated polypeptide 2, isoform alpha OS=Homo sapiens OX=9606 GN=TMPO PE=1 SV=2	TMPO	1	4.83787e-07	150.44	2	SHISDQSPLSSK(1)R	0.15386	6	0.830245	1.04199	1.14228	0.99926	0.919021	1.06721	0.933327	1.06651	1.11623	0.846688	0.999605	1.03765	0.89	0.977	1.023	1.18	0.919	1.028	1.082	0.416414
P42166	248	K	Lamina-associated polypeptide 2, isoform alpha OS=Homo sapiens OX=9606 GN=TMPO PE=1 SV=2	TMPO	1	0.00164789	67.881	2	VHTSK(1)GDLPR	-0.98196	4		1.05977	1.09032		0.87714	0.972761	0.933327	1.06651	1.11623	0.846688	0.999605	1.03765		0.994	0.977		0.877	0.937	0.92	0.134599
P42167	207	K	Lamina-associated polypeptide 2, isoforms beta/gamma OS=Homo sapiens OX=9606 GN=TMPO PE=1 SV=2	TMPO	1	0.0218724	56.378	2	AK(1)TPVTLK	-1.2236	2		0.732529		1.26747			1.04015	0.901353	0.975322	1.17346	0.916744	0.992973		0.813		1.08			1.328
P42167	213	K	Lamina-associated polypeptide 2, isoforms beta/gamma OS=Homo sapiens OX=9606 GN=TMPO PE=1 SV=2	TMPO	1	3.71471e-07	166.86	2	TPVTLK(1)QR	-0.37076	6	1.44254	0.861007	0.763645	1.45024	0.711974	0.770596	1.04015	0.901353	0.975322	1.17346	0.916744	0.992973	1.387	0.955	0.783	1.236	0.777	0.776	0.892	0.654552
P42167	389	K	Lamina-associated polypeptide 2, isoforms beta/gamma OS=Homo sapiens OX=9606 GN=TMPO PE=1 SV=2	TMPO	1	0.0393105	71.066	2	MEESFSSK(1)YVPK	2.0076	2		0.913862	1.08614				1.04015	0.901353	0.975322	1.17346	0.916744	0.992973		1.014	1.114
P42224	697	K	Signal transducer and activator of transcription 1-alpha/beta OS=Homo sapiens OX=9606 GN=STAT1 PE=1 SV=2	STAT1	1	0.00561682	44.045	2	EAPEPMELDGPK(1)GTGYIK	3.5187	1		1					0.591242	1.24567	0.836263	0.782308	1.48762	1.05689		0.803
P42224	685	K	Signal transducer and activator of transcription 1-alpha/beta OS=Homo sapiens OX=9606 GN=STAT1 PE=1 SV=2	STAT1	1	0.00063393	72.327	2	PK(1)EAPEPMELDGPK	5.7116	1		1					0.591242	1.24567	0.836263	0.782308	1.48762	1.05689		0.803
P42224	193	K	Signal transducer and activator of transcription 1-alpha/beta OS=Homo sapiens OX=9606 GN=STAT1 PE=1 SV=2	STAT1	1	4.49109e-31	251.58	2	SDQK(1)QEQLLLK	-0.46486	6	0.622031	1.26609	0.749045	0.961259	1.45571	0.94586	0.591242	1.24567	0.836263	0.782308	1.48762	1.05689	1.052	1.016	0.896	1.229	0.979	0.895	1.047	0.731478
P42285	369	K	Exosome RNA helicase MTR4 OS=Homo sapiens OX=9606 GN=MTREX PE=1 SV=3	MTREX	1	0.00216707	72.365	2	GGTK(1)GPSNVFK	1.3751	7	1.22554	0.981212	0.895807		0.734873	1.16257	1.00285	0.976278	1.04298	0.970809	0.994987	1.01209	1.222	1.005	0.859		0.739	1.149	0.918	0.66859
P42285	35	K	Exosome RNA helicase MTR4 OS=Homo sapiens OX=9606 GN=MTREX PE=1 SV=3	MTREX	1	0.0042234	74.424	2	WK(1)GPPGSADK	0.54165	5	1.00159	0.47495	1.15835	1.23752		1.12759	1.00285	0.976278	1.04298	0.970809	0.994987	1.01209	0.999	0.486	1.111	1.275		1.114	1.38	0.342691
P42574	57	K	Caspase-3 OS=Homo sapiens OX=9606 GN=CASP3 PE=1 SV=2	CASP3	1	0.0882522	57.888	2	NFHK(1)STGMTSR	0.5034	1					1		0.762021	1.04486	0.909033	1.10588	1.05629	1.12191					0.947
P42677	5	K	40S ribosomal protein S27 OS=Homo sapiens OX=9606 GN=RPS27 PE=1 SV=3	RPS27	1	0.000105129	92.747	3	PLAK(1)DLLHPSPEEEK	0.76818	6		1.28658	0.920829	0.499915	1.18179	1.11089	0.962454	0.94621	1.03272	0.992847	1.00499	1.06078		1.36	0.892	0.504	1.176	1.047	0.807	0.546059
P43034	88	K	Platelet-activating factor acetylhydrolase IB subunit beta OS=Homo sapiens OX=9606 GN=PAFAH1B1 PE=1 SV=2	PAFAH1B1	1	8.78714e-07	118.91	2	EEFTSGGPLGQK(1)R	-0.15229	6	1.19532	0.9341	0.686665	1.37649	0.956432	0.850985	0.988348	0.9652	0.970451	1.02	1.00205	1.05395	1.209	0.968	0.708	1.35	0.954	0.807	1.078	0.745202
P43243	245	K	Matrin-3 OS=Homo sapiens OX=9606 GN=MATR3 PE=1 SV=2	MATR3	1	1.272e-13	88.115	3	DDSFFGETSHNYHK(1)FDSEYER	0.64225	2	0.85509			1.14491			0.913214	1.00246	1.03444	0.956632	1.01489	1.07837	0.936			1.197			1.279
P43243	3	K	Matrin-3 OS=Homo sapiens OX=9606 GN=MATR3 PE=1 SV=2	MATR3	1	3.82344e-05	107.08	2	SK(1)SFQQSSLSR	0.22945	6	0.891025	1.13183	0.949814	0.941252	1.05698	1.0291	0.913214	1.00246	1.03444	0.956632	1.01489	1.07837	0.976	1.129	0.918	0.984	1.041	0.954	0.985	0.870953
P43246	537	K	DNA mismatch repair protein Msh2 OS=Homo sapiens OX=9606 GN=MSH2 PE=1 SV=1	MSH2	1	1.14712e-05	120.65	2	NNK(1)NFSTVDIQK	0.4985	6	0.998197	1.06633	0.897742	1.23554	0.85053	0.951669	0.892696	1.05619	1.03914	0.963273	1.02442	1.02428	1.118	1.01	0.864	1.283	0.83	0.929	1.017	0.97689
P43487	150	K	Ran-specific GTPase-activating protein OS=Homo sapiens OX=9606 GN=RANBP1 PE=1 SV=1	RANBP1	1	0.00112245	83.358	2	FLNAENAQK(1)FK	0.98396	2	0.988523			1.01148			1.00428	0.941256	1.04937	0.980053	0.995169	1.02987	0.984			1.032			1.049
P43487	154	K	Ran-specific GTPase-activating protein OS=Homo sapiens OX=9606 GN=RANBP1 PE=1 SV=1	RANBP1	1	0.0306362	67.903	2	TK(1)FEECR	-0.064469	4	1.00236	1.3416	1.03275	0.623298			1.00428	0.941256	1.04937	0.980053	0.995169	1.02987	0.998	1.425	0.984	0.636			0.56
P43490	423	K	Nicotinamide phosphoribosyltransferase OS=Homo sapiens OX=9606 GN=NAMPT PE=1 SV=1	NAMPT	1	0.0351072	43.734	2	DPVADPNK(1)R	-0.14297	1		1					1.32755	0.857012	0.760754	1.35909	0.880637	0.814958		1.167
P45973	91	K	Chromobox protein homolog 5 OS=Homo sapiens OX=9606 GN=CBX5 PE=1 SV=1	CBX5	1	3.13083e-06	160.62	2	K(1)SNFSNSADDIK	-1.9547	6	0.860795	1.13636	1.05328	1.02231	0.885612	1.04164	1.03436	1.00162	1.14072	0.994814	0.86711	0.961373	0.832	1.135	0.923	1.028	1.021	1.083	1.084	0.395822
P45973	102	K	Chromobox protein homolog 5 OS=Homo sapiens OX=9606 GN=CBX5 PE=1 SV=1	CBX5	1	4.37331e-13	183.08	2	SNFSNSADDIK(1)SK	0.18769	6	1.11192	0.993221	0.861308	1.36603	0.76264	0.904884	1.03436	1.00162	1.14072	0.994814	0.86711	0.961373	1.075	0.992	0.755	1.373	0.88	0.941	1.132	0.546765
P45973	32	K	Chromobox protein homolog 5 OS=Homo sapiens OX=9606 GN=CBX5 PE=1 SV=1	CBX5	1	0.00091419	85.622	2	VVK(1)GQVEYLLK	0.48835	6	1.00965	1.0254	0.889754	1.43379	0.791775	0.84963	1.03436	1.00162	1.14072	0.994814	0.86711	0.961373	0.976	1.024	0.78	1.441	0.913	0.884	1.165	0.496959
P45985	45	K	Dual specificity mitogen-activated protein kinase kinase 4 OS=Homo sapiens OX=9606 GN=MAP2K4 PE=1 SV=1	MAP2K4	1	6.91371e-05	105.36	2	ALK(1)LNFANPPFK	-0.47855	10	0.717716	0.99463	0.987433	1.30136	0.943483	1.05538	0.91399	0.980977	1.01152	1.01223	1.01999	1.0613	0.785	1.014	0.976	1.286	0.925	0.994	1.155	0.335188
P46013	2500	K	Proliferation marker protein Ki-67 OS=Homo sapiens OX=9606 GN=MKI67 PE=1 SV=2	MKI67	1	0.00452534	59.645	2	EEPLAVSK(1)LTR	0.06597	3		1.40813	0.959042		0.632828		0.493365	1.37077	1.24905	0.241545	1.39752	1.24775		1.027	0.768		0.453		0.505
P46013	2017	K	Proliferation marker protein Ki-67 OS=Homo sapiens OX=9606 GN=MKI67 PE=1 SV=2	MKI67	1	2.44445e-05	78.864	2	EEVLPVGK(1)LTQTSGK	-0.73358	1		1					0.493365	1.37077	1.24905	0.241545	1.39752	1.24775		0.73
P46013	2187	K	Proliferation marker protein Ki-67 OS=Homo sapiens OX=9606 GN=MKI67 PE=1 SV=2	MKI67	1	0.000801281	73.655	2	GK(1)AQPLEDLAGLK	0.52494	2			0.842392		1.15761		0.493365	1.37077	1.24905	0.241545	1.39752	1.24775			0.674		0.828		1.228
P46013	910	K	Proliferation marker protein Ki-67 OS=Homo sapiens OX=9606 GN=MKI67 PE=1 SV=2	MKI67	1	0.0461292	49.16	2	GQK(1)ATLLQQR	-8.3184	1			1				0.493365	1.37077	1.24905	0.241545	1.39752	1.24775			0.801
P46013	1004	K	Proliferation marker protein Ki-67 OS=Homo sapiens OX=9606 GN=MKI67 PE=1 SV=2	MKI67	1	0.00432696	65.421	3	ITK(1)MPCQSLQPEPINTPTHTK	0.19642	1		1					0.493365	1.37077	1.24905	0.241545	1.39752	1.24775		0.73
P46013	1275	K	Proliferation marker protein Ki-67 OS=Homo sapiens OX=9606 GN=MKI67 PE=1 SV=2	MKI67	1	6.48852e-05	97.175	2	K(1)ADVEGELLACR	-0.10033	4		1.32416	1.07346		0.884736	0.717642	0.493365	1.37077	1.24905	0.241545	1.39752	1.24775		0.966	0.859		0.633	0.575	0.662	0.0322607
P46013	2892	K	Proliferation marker protein Ki-67 OS=Homo sapiens OX=9606 GN=MKI67 PE=1 SV=2	MKI67	1	0.000240769	73.655	2	K(1)LDAEDVIGSR	0.29733	2		1.1604			0.839605		0.493365	1.37077	1.24905	0.241545	1.39752	1.24775		0.847			0.601		0.71
P46013	1452	K	Proliferation marker protein Ki-67 OS=Homo sapiens OX=9606 GN=MKI67 PE=1 SV=2	MKI67	1	4.43595e-05	90.306	2	LDPAASVTGSK(1)R	0.60479	5	0.503864	1.30547	1.08933		1.07341	1.02793	0.493365	1.37077	1.24905	0.241545	1.39752	1.24775	1.021	0.952	0.872		0.768	0.824	0.839	0.0742431
P46013	886	K	Proliferation marker protein Ki-67 OS=Homo sapiens OX=9606 GN=MKI67 PE=1 SV=2	MKI67	1	0.00143099	100.84	2	NIQK(1)LPVESK	-0.092823	4		1.1441	1.09863		0.959209	0.798064	0.493365	1.37077	1.24905	0.241545	1.39752	1.24775		0.835	0.88		0.686	0.64	0.773	0.0273844
P46013	850	K	Proliferation marker protein Ki-67 OS=Homo sapiens OX=9606 GN=MKI67 PE=1 SV=2	MKI67	1	0.0038701	47.334	2	NTYK(1)MTSLETK	-1.3884	2			1.22494			0.775058	0.493365	1.37077	1.24905	0.241545	1.39752	1.24775			0.981			0.621	0.633
P46013	1441	K	Proliferation marker protein Ki-67 OS=Homo sapiens OX=9606 GN=MKI67 PE=1 SV=2	MKI67	1	0.00048158	67.548	2	QK(1)LDPAASVTGSK	3.1697	2		1.04603			0.953969		0.493365	1.37077	1.24905	0.241545	1.39752	1.24775		0.763			0.683		0.895
P46013	548	K	Proliferation marker protein Ki-67 OS=Homo sapiens OX=9606 GN=MKI67 PE=1 SV=2	MKI67	1	0.00211779	64.064	2	SLVMHTPPVLK(1)K	-3.1245	2		1.23693	0.763067				0.493365	1.37077	1.24905	0.241545	1.39752	1.24775		0.902	0.611
P46013	1630	K	Proliferation marker protein Ki-67 OS=Homo sapiens OX=9606 GN=MKI67 PE=1 SV=2	MKI67	1	0.00010506	93.772	3	SSQPDPDKNPASSK(1)R	1.2257	1			1				0.493365	1.37077	1.24905	0.241545	1.39752	1.24775			0.801
P46063	637	K	ATP-dependent DNA helicase Q1 OS=Homo sapiens OX=9606 GN=RECQL PE=1 SV=3	RECQL	1	1.89252e-44	233.7	2	AANMLQQSGSK(1)NTGAK	-0.10195	6	1.14342	0.998266	0.964788	1.16574	0.871709	0.856078	1.02369	1.00875	1.05871	0.943423	0.936553	1.02888	1.117	0.99	0.911	1.236	0.931	0.832	0.994	0.903736
P46063	626	K	ATP-dependent DNA helicase Q1 OS=Homo sapiens OX=9606 GN=RECQL PE=1 SV=3	RECQL	1	9.29897e-07	179.95	2	K(1)AANMLQQSGSK	0.16064	6	0.938641	1.11933	0.976585	1.11398	0.952682	0.898776	1.02369	1.00875	1.05871	0.943423	0.936553	1.02888	0.917	1.11	0.922	1.181	1.017	0.874	1.042	0.745132
P46087	735	K	Probable 28S rRNA (cytosine(4447)-C(5))-methyltransferase OS=Homo sapiens OX=9606 GN=NOP2 PE=1 SV=2	NOP2	0.997291	1.12091e-13	105.79	3	GTDTQTPAVLSPSK(0.997)TQATLK(0.003)PK	0.9827	4	1.30911	0.583108	0.494444	1.61334			1.07474	0.998777	1.02321	1.05949	0.940087	0.9037	1.218	0.584	0.483	1.523			2
P46087	79	K	Probable 28S rRNA (cytosine(4447)-C(5))-methyltransferase OS=Homo sapiens OX=9606 GN=NOP2 PE=1 SV=2	NOP2	1	5.64521e-08	124.24	2	LPK(1)GISAGAVQTAGK	-0.063623	6	1.08232	1.14755	0.898472	1.12563	0.881764	0.864265	1.07474	0.998777	1.02321	1.05949	0.940087	0.9037	1.007	1.149	0.878	1.062	0.938	0.956	0.974	0.816116
P46087	76	K	Probable 28S rRNA (cytosine(4447)-C(5))-methyltransferase OS=Homo sapiens OX=9606 GN=NOP2 PE=1 SV=2	NOP2	1	0.076027	46.835	2	PLPGK(1)LPK	0.16523	1			1				1.07474	0.998777	1.02321	1.05949	0.940087	0.9037			0.977
P46100	956	K	Transcriptional regulator ATRX OS=Homo sapiens OX=9606 GN=ATRX PE=1 SV=5	ATRX	1	0.000544395	89.382	2	K(1)VQDGLSDIAEK	-1.2718	4		1.13571		0.736363	0.957113	1.17081	0.643153	1.12786	0.965848	0.830234	1.11323	1.31967		1.007		0.887	0.86	0.887	0.872
P46100	568	K	Transcriptional regulator ATRX OS=Homo sapiens OX=9606 GN=ATRX PE=1 SV=5	ATRX	1	0.00151807	91.783	2	LNISSK(1)DNR	0.25755	6	1.33538	0.965551	0.80256	1.20997	0.808237	0.878302	0.643153	1.12786	0.965848	0.830234	1.11323	1.31967	2.076	0.856	0.831	1.457	0.726	0.666	0.757	0.560796
P46100	690	K	Transcriptional regulator ATRX OS=Homo sapiens OX=9606 GN=ATRX PE=1 SV=5	ATRX	1	0.0558757	44.767	2	QK(1)LSVPVR	0.29401	1		1					0.643153	1.12786	0.965848	0.830234	1.11323	1.31967		0.887
P46100	799	K	Transcriptional regulator ATRX OS=Homo sapiens OX=9606 GN=ATRX PE=1 SV=5	ATRX	1	0.0390197	53.517	2	SAK(1)SSIISK	0.25405	1		1					0.643153	1.12786	0.965848	0.830234	1.11323	1.31967		0.887
P46100	830	K	Transcriptional regulator ATRX OS=Homo sapiens OX=9606 GN=ATRX PE=1 SV=5	ATRX	1	0.000997903	94.806	2	SMSK(1)IGAAR	0.35522	6	0.83652	1.14396	0.905965	0.921421	1.01194	1.18019	0.643153	1.12786	0.965848	0.830234	1.11323	1.31967	1.301	1.014	0.938	1.11	0.909	0.894	0.895	0.431907
P46100	768	K	Transcriptional regulator ATRX OS=Homo sapiens OX=9606 GN=ATRX PE=1 SV=5	ATRX	1	0.0599026	44.57	2	TLYDLK(1)TQAGK	0.52501	1				1			0.643153	1.12786	0.965848	0.830234	1.11323	1.31967				1.204
P46100	584	K	Transcriptional regulator ATRX OS=Homo sapiens OX=9606 GN=ATRX PE=1 SV=5	ATRX	1	0.0135534	62.969	2	VTK(1)ELYVK	-0.090995	2				1.11409	0.885909		0.643153	1.12786	0.965848	0.830234	1.11323	1.31967				1.342	0.796
P46459	105	K	Vesicle-fusing ATPase OS=Homo sapiens OX=9606 GN=NSF PE=1 SV=3	NSF	1	3.5591e-11	163.59	2	K(1)SIDSNPYDTDK	-0.36759	6	0.792956	1.1117	0.857238	1.15197	1.03955	1.04659	1.02968	0.940559	0.99437	1.12665	0.92014	0.9886	0.77	1.182	0.862	1.022	1.13	1.059	1.141	0.323651
P46776	94	K	60S ribosomal protein L27a OS=Homo sapiens OX=9606 GN=RPL27A PE=1 SV=2	RPL27A	1	0.00462464	60	2	NK(1)TGAAPIIDVVR	0.49362	1						1	1.05169	0.872263	1.0428	1.08431	0.93059	1.01835						0.982
P46777	197	K	60S ribosomal protein L5 OS=Homo sapiens OX=9606 GN=RPL5 PE=1 SV=3	RPL5	1	0.000353414	65.879	2	K(1)HIMGQNVADYMR	1.364	1	1						0.992506	0.972456	1.01328	1.03683	0.969071	1.01585	1.008
P46777	41	K	60S ribosomal protein L5 OS=Homo sapiens OX=9606 GN=RPL5 PE=1 SV=3	RPL5	1	0.00387058	81.32	2	LVIQDK(1)NK	1.0398	6	1.2526	0.964062	0.971051	1.25729	0.72809	0.826907	0.992506	0.972456	1.01328	1.03683	0.969071	1.01585	1.262	0.991	0.958	1.213	0.751	0.814	0.865	0.404486
P46777	276	K	60S ribosomal protein L5 OS=Homo sapiens OX=9606 GN=RPL5 PE=1 SV=3	RPL5	1	0.0074887	105.22	2	MSLAQK(1)K	-0.59332	6	0.961099	0.999498	1.10226	1.2264	0.896379	0.814362	0.992506	0.972456	1.01328	1.03683	0.969071	1.01585	0.968	1.028	1.088	1.183	0.925	0.802	0.944	0.58628
P46777	270	K	60S ribosomal protein L5 OS=Homo sapiens OX=9606 GN=RPL5 PE=1 SV=3	RPL5	1	7.93098e-05	154.71	2	WNRPK(1)MSLAQK	-0.35762	17	0.950982	1.10795	1.00017	1.03649	0.945094	0.959315	0.992506	0.972456	1.01328	1.03683	0.969071	1.01585	0.958	1.139	0.987	1	0.975	0.944	0.946	0.402324
P46777	284	K	60S ribosomal protein L5 OS=Homo sapiens OX=9606 GN=RPL5 PE=1 SV=3	RPL5	0.973062	0.00375952	92.428	2	VAQK(0.027)K(0.973)ASFLR	1.504	4		1.00698	0.723159		0.810709	1.45916	0.992506	0.972456	1.01328	1.03683	0.969071	1.01585		1.035	0.714		0.837	1.436	1.3	0.535183
P46781	139	K	40S ribosomal protein S9 OS=Homo sapiens OX=9606 GN=RPS9 PE=1 SV=3	RPS9	1	0.000913777	66.664	2	K(1)QVVNIPSFIVR	-1.4295	1				1			1.03052	0.882418	1.01963	1.08357	0.964036	1.01983				0.923
P46782	63	K	40S ribosomal protein S5 OS=Homo sapiens OX=9606 GN=RPS5 PE=1 SV=4	RPS5	1	0.000276257	106.93	2	K(1)AQCPIVER	0.077645	6	0.924934	1.41259	1.12877	0.708242	0.941944	0.883526	1.02293	0.959812	1.01879	1.02632	0.964787	1.00736	0.904	1.472	1.108	0.69	0.976	0.877	0.73	0.155715
P46782	47	K	40S ribosomal protein S5 OS=Homo sapiens OX=9606 GN=RPS5 PE=1 SV=4	RPS5	1	0.0194383	61.577	2	YAK(1)YLPHSAGR	0.57446	3		1.18982			1.2053	0.604879	1.02293	0.959812	1.01879	1.02632	0.964787	1.00736		1.24			1.249	0.6	0.746
P46783	139	K	40S ribosomal protein S10 OS=Homo sapiens OX=9606 GN=RPS10 PE=1 SV=1	RPS10	1	4.1072e-17	155.57	2	K(1)AEAGAGSATEFQFR	-0.74326	6	0.899264	0.724566	0.729629	1.68906	0.902915	1.05456	0.984513	0.972963	1.03718	0.979712	1.06655	0.959084	0.913	0.745	0.703	1.724	0.847	1.1	1.555	0.143195
P46783	107	K	40S ribosomal protein S10 OS=Homo sapiens OX=9606 GN=RPS10 PE=1 SV=1	RPS10	1	5.11421e-05	130.79	2	PK(1)GLEGERPAR	-0.0018006	13	0.971899	0.984687	0.791822	1.31808	1.00816	0.925344	0.984513	0.972963	1.03718	0.979712	1.06655	0.959084	0.987	1.012	0.763	1.345	0.945	0.965	1.178	0.337393
P46937	90	K	Transcriptional coactivator YAP1 OS=Homo sapiens OX=9606 GN=YAP1 PE=1 SV=2	YAP1	1	0.00203864	83.214	2	K(1)LPDSFFKPPEPK	0.58661	4	0.685481	1.09229	1.07561		1.14661		0.961472	0.94147	0.989933	0.977408	1.02869	1.10103	0.713	1.16	1.087		1.115		1.13
P46937	321	K	Transcriptional coactivator YAP1 OS=Homo sapiens OX=9606 GN=YAP1 PE=1 SV=2	YAP1	1	0.00106217	98.009	2	LK(1)QQELLR	-0.29973	6	1.00902	1.00715	0.89839	1.09287	0.934366	1.0582	0.961472	0.94147	0.989933	0.977408	1.02869	1.10103	1.049	1.07	0.908	1.118	0.908	0.961	0.987	0.865628
P46940	1475	K	Ras GTPase-activating-like protein IQGAP1 OS=Homo sapiens OX=9606 GN=IQGAP1 PE=1 SV=1	IQGAP1	1	1.37755e-06	136.84	2	LTELGTVDPK(1)NK	-1.8522	11	1.37743	0.707655	0.349133	1.96761	0.940181	0.657985	1.0394	0.976933	0.991953	1.0785	0.945163	0.968051	1.325	0.724	0.352	1.824	0.995	0.68	1.457	0.418014
P46940	1445	K	Ras GTPase-activating-like protein IQGAP1 OS=Homo sapiens OX=9606 GN=IQGAP1 PE=1 SV=1	IQGAP1	1	8.6616e-07	128.57	2	SVK(1)EDSNLTLQEK	-2.0247	2				0.97275	1.02725		1.0394	0.976933	0.991953	1.0785	0.945163	0.968051				0.902	1.087
P47755	97	K	F-actin-capping protein subunit alpha-2 OS=Homo sapiens OX=9606 GN=CAPZA2 PE=1 SV=3	CAPZA2	1	0.0235775	60.892	2	ICFK(1)FDHLR	-0.87898	1				1			1.03844	0.925626	0.977801	1.08774	0.941013	1.02938				0.919
P47914	73	K	60S ribosomal protein L29 OS=Homo sapiens OX=9606 GN=RPL29 PE=1 SV=2	RPL29	0.999991	0.0028891	81.099	2	AEAIK(1)ALVKPK	-0.03061	6	0.937471	0.935403	0.895724	1.12899	1.0703	1.03211	1.04317	0.835655	1.01297		0.952321	1.15589	0.899	1.119	0.884		1.124	0.893	1.043	0.773656
P47914	149	K	60S ribosomal protein L29 OS=Homo sapiens OX=9606 GN=RPL29 PE=1 SV=2	RPL29	1	8.39031e-23	188.88	2	AQAAAPASVPAQAPK(1)R	0.15763	7	1.07396	0.972732	0.85879	1.2604	0.947181	0.886945	1.04317	0.835655	1.01297		0.952321	1.15589	1.03	1.164	0.848		0.995	0.767	0.869	0.427239
P47914	134	K	60S ribosomal protein L29 OS=Homo sapiens OX=9606 GN=RPL29 PE=1 SV=2	RPL29	1	1.55239e-20	166.65	2	DQTK(1)AQAAAPASVPAQAPK	-0.50806	5	0.740537		0.646588	0.453762	1.815	1.34411	1.04317	0.835655	1.01297		0.952321	1.15589	0.71		0.638		1.906	1.163	2.277	0.0881306
P47914	103	K	60S ribosomal protein L29 OS=Homo sapiens OX=9606 GN=RPL29 PE=1 SV=2	RPL29	1	0.00420824	49.96	2	LAYIAHPK(1)LGK	-1.2789	2				1.07203		0.927975	1.04317	0.835655	1.01297		0.952321	1.15589						0.803
P48444	233	K	Coatomer subunit delta OS=Homo sapiens OX=9606 GN=ARCN1 PE=1 SV=1	ARCN1	1	0.00107531	76.85	2	GK(1)EVDNFVDK	0.6235	4		1.35999	0.807332	0.78222		1.05046	0.950096	1.02804	1.05145	0.944033	0.990062	1.03632		1.323	0.768	0.829		1.014	0.881	0.774813
P48444	224	K	Coatomer subunit delta OS=Homo sapiens OX=9606 GN=ARCN1 PE=1 SV=1	ARCN1	1	0.0422902	63.397	2	VAPAPARPSGPSK(1)ALK	0.96692	3			1.02254		0.977459		0.950096	1.02804	1.05145	0.944033	0.990062	1.03632			0.973		0.987		1.014
P48507	34	K	Glutamate--cysteine ligase regulatory subunit OS=Homo sapiens OX=9606 GN=GCLM PE=1 SV=1	GCLM	1	5.59043e-23	192.68	3	K(1)CPSTHSEELHDCIQK	0.49246	18	0.928589	0.930438	1.02946	1.1003	0.92467	1.08655	0.957596	0.970771	0.996423	0.995821	0.987126	1.09226	0.97	0.958	1.033	1.105	0.937	0.995	1.026	0.682714
P48634	49	K	Protein PRRC2A OS=Homo sapiens OX=9606 GN=PRRC2A PE=1 SV=3	PRRC2A	1	3.28344e-07	133.49	2	HGLQSLGK(1)VAIAR	-0.27903	5		1.03641	0.912453	0.963692	1.04673	1.04072	0.985064	0.999654	0.906462	0.987353	1.05072	1.07075		1.037	1.007	0.976	0.996	0.972	0.96	0.0696063
P48643	170	K	T-complex protein 1 subunit epsilon OS=Homo sapiens OX=9606 GN=CCT5 PE=1 SV=1	CCT5	1	2.46528e-12	119.79	2	DTEPLIQTAK(1)TTLGSK	-0.31945	2	0.801264			1.19874			0.969567	0.994142	1.05326	0.952013	1.01096	1.02006	0.826			1.259			1.524
P48643	265	K	T-complex protein 1 subunit epsilon OS=Homo sapiens OX=9606 GN=CCT5 PE=1 SV=1	CCT5	1	1.79967e-11	150.44	2	HK(1)LDVTSVEDYK	-0.19687	2	1.10894	0.891062					0.969567	0.994142	1.05326	0.952013	1.01096	1.02006	1.144	0.896
P48729	8	K	Casein kinase I isoform alpha OS=Homo sapiens OX=9606 GN=CSNK1A1 PE=1 SV=2	CSNK1A1	1	1.88185e-17	135.5	2	ASSSGSK(1)AEFIVGGK	-0.41507	5		0.875565	0.799852	1.74	0.65276	0.93182	0.953999	0.99918	1.02485	0.983588	1.00649	1.03189		0.876	0.78	1.769	0.649	0.903	1.337	0.633987
P49005	267	K	DNA polymerase delta subunit 2 OS=Homo sapiens OX=9606 GN=POLD2 PE=1 SV=1	POLD2	1	0.000368567	110.52	2	K(1)TQAASVEAVK	0.12082	5		1.18568	1.1127	0.574963	1.09159	1.03508	0.830585	1.04485	1.00793	0.908236	1.08905	1.11935		1.135	1.104	0.633	1.002	0.925	0.762	0.2109
P49207	36	K	60S ribosomal protein L34 OS=Homo sapiens OX=9606 GN=RPL34 PE=1 SV=3	RPL34	1	0.046213	49.325	2	IVYLYTK(1)K	-0.34299	2				1.35191		0.648091	1.08127	0.72227	0.99718	1.24844	0.963262	0.987579				1.083		0.656
P49207	19	K	60S ribosomal protein L34 OS=Homo sapiens OX=9606 GN=RPL34 PE=1 SV=3	RPL34	1	0.000590102	51.531	2	LSYNTASNK(1)TR	0.23769	2	1.01632			0.983679			1.08127	0.72227	0.99718	1.24844	0.963262	0.987579	0.94			0.788			0.838
P49368	381	K	T-complex protein 1 subunit gamma OS=Homo sapiens OX=9606 GN=CCT3 PE=1 SV=4	CCT3	1	0.000540332	42.061	2	GASK(1)EILSEVER	-1.9328	1				1			0.993946	0.956212	1.02268	1.01079	0.991189	1.02519				0.989
P49411	91	K	Elongation factor Tu, mitochondrial OS=Homo sapiens OX=9606 GN=TUFM PE=1 SV=2	TUFM	1	0.000362376	82.437	2	K(1)YEEIDNAPEER	0.44643	1		1					1.20792	0.888402	0.948761	1.16169	0.880357	0.912864		1.126
P49585	355	K	Choline-phosphate cytidylyltransferase A OS=Homo sapiens OX=9606 GN=PCYT1A PE=1 SV=2	PCYT1A	1	8.31608e-23	203.8	2	HK(1)AAAYDISEDEED	0.67417	6	0.916369	0.921855	0.983456	1.36581	0.82255	0.989964	1.03968	1.01223	1.00607	0.943961	0.972884	1.02517	0.881	0.911	0.978	1.447	0.845	0.966	1.176	0.454417
P49585	8	K	Choline-phosphate cytidylyltransferase A OS=Homo sapiens OX=9606 GN=PCYT1A PE=1 SV=2	PCYT1A	1	4.49409e-06	132.44	2	MDAQCSAK(1)VNAR	0.49067	6	0.823619	1.03968	0.959019	1.39058	0.897347	0.889751	1.03968	1.01223	1.00607	0.943961	0.972884	1.02517	0.792	1.027	0.953	1.473	0.922	0.868	1.177	0.490138
P49711	202	K	Transcriptional repressor CTCF OS=Homo sapiens OX=9606 GN=CTCF PE=1 SV=1	CTCF	1	0.0110375	69.915	2	DPDYQPPAK(1)K	7.5912	2					0.90111	1.09889	0.968994	0.956336	1.06764	0.97465	0.943825	1.08855					0.955	1.009
P49736	896	K	DNA replication licensing factor MCM2 OS=Homo sapiens OX=9606 GN=MCM2 PE=1 SV=4	MCM2	1	0.000449679	134.85	2	FSHDLK(1)R	0.46003	4	1.5069		0.658711	1.16516	0.66923		0.786129	1.06039	1.14566	0.737783	1.08422	1.18581	1.917		0.575	1.579	0.617		0.881	0.942933
P49750	808	K	YLP motif-containing protein 1 OS=Homo sapiens OX=9606 GN=YLPM1 PE=1 SV=4	YLPM1	1	0.00634876	65.313	2	SK(1)WGMIPR	0.039938	4	1.2995			1.35373	0.522045	0.824725	1.02837	0.978244	1.05858	1.03275	0.941505	0.960551	1.264			1.311	0.554	0.859	0.718
P49756	739	K	RNA-binding protein 25 OS=Homo sapiens OX=9606 GN=RBM25 PE=1 SV=3	RBM25	1	0.00290486	86.205	2	HIK(1)SLIEK	-0.16285	2	0.879742			1.12026			0.999224	0.948802	0.981769	1.03702	1.01527	1.01792	0.88			1.08			1.227
P49756	688	K	RNA-binding protein 25 OS=Homo sapiens OX=9606 GN=RBM25 PE=1 SV=3	RBM25	1	0.00129329	102.55	2	K(1)LPVDSVFNK	-0.34845	5	0.746989	1.078		1.07663	1.038	1.06038	0.999224	0.948802	0.981769	1.03702	1.01527	1.01792	0.748	1.136		1.038	1.022	1.042	1.098	0.514838
P49756	711	K	RNA-binding protein 25 OS=Homo sapiens OX=9606 GN=RBM25 PE=1 SV=3	RBM25	1	8.81925e-13	128.46	2	K(1)LVPLDYGEDDK	-0.40007	17	0.627218	0.884787	0.866916	1.62123	0.932955	1.0669	0.999224	0.948802	0.981769	1.03702	1.01527	1.01792	0.628	0.933	0.883	1.563	0.919	1.048	1.444	0.15289
P49756	462	K	RNA-binding protein 25 OS=Homo sapiens OX=9606 GN=RBM25 PE=1 SV=3	RBM25	1	0.0565943	56.091	2	LK(1)NWEIR	1.2044	1						1	0.999224	0.948802	0.981769	1.03702	1.01527	1.01792						0.982
P49773	7	K	Adenosine 5'-monophosphoramidase HINT1 OS=Homo sapiens OX=9606 GN=HINT1 PE=1 SV=2	HINT1	1	3.08037e-06	187.23	2	ADEIAK(1)AQVAR	0.25491	6	1.1822	1.03688	0.85146	1.31816	0.803795	0.807498	1.16427	0.929461	1.01048	1.11656	0.886969	0.892262	1.015	1.116	0.843	1.181	0.906	0.905	1.006	0.971124
P49773	30	K	Adenosine 5'-monophosphoramidase HINT1 OS=Homo sapiens OX=9606 GN=HINT1 PE=1 SV=2	HINT1	1	0.00541969	61.577	2	EIPAK(1)IIFEDDR	-0.4634	1				1			1.16427	0.929461	1.01048	1.11656	0.886969	0.892262				0.896
P49773	21	K	Adenosine 5'-monophosphoramidase HINT1 OS=Homo sapiens OX=9606 GN=HINT1 PE=1 SV=2	HINT1	1	0.00501977	56.202	2	PGGDTIFGK(1)IIR	-1.1426	1						1	1.16427	0.929461	1.01048	1.11656	0.886969	0.892262						1.121
P49792	1851	K	E3 SUMO-protein ligase RanBP2 OS=Homo sapiens OX=9606 GN=RANBP2 PE=1 SV=2	RANBP2	1	0.000108773	117.45	2	ASK(1)FGNTEQGFK	0.016559	6	1.07905	0.92772	0.732347	1.35355	0.968715	0.938615	1.01894	0.989571	0.973511	1.01211	1.00815	0.997715	1.059	0.937	0.752	1.337	0.961	0.941	1.179	0.348308
P49792	1985	K	E3 SUMO-protein ligase RanBP2 OS=Homo sapiens OX=9606 GN=RANBP2 PE=1 SV=2	RANBP2	1	3.39399e-05	110.88	2	LFSSQYGK(1)MANK	-0.36352	4	1.15557	0.908027		1.21263	0.723773		1.01894	0.989571	0.973511	1.01211	1.00815	0.997715	1.134	0.918		1.198	0.718		0.934	0.763288
P49792	1446	K	E3 SUMO-protein ligase RanBP2 OS=Homo sapiens OX=9606 GN=RANBP2 PE=1 SV=2	RANBP2	1	1.34061e-28	221.63	2	SANK(1)SGSSFVHQASFK	-0.67788	6	1.90925	0.511336	0.606908	1.81014	0.622388	0.539978	1.01894	0.989571	0.973511	1.01211	1.00815	0.997715	1.874	0.517	0.623	1.788	0.617	0.541	0.977	0.994892
P49792	1533	K	E3 SUMO-protein ligase RanBP2 OS=Homo sapiens OX=9606 GN=RANBP2 PE=1 SV=2	RANBP2	1	0.0214337	47.361	2	TLK(1)SGFEDMFAK	0.22196	1				1			1.01894	0.989571	0.973511	1.01211	1.00815	0.997715				0.988
P49916	201	K	DNA ligase 3 OS=Homo sapiens OX=9606 GN=LIG3 PE=1 SV=2	LIG3	1	7.92578e-08	100.69	2	AVVQAK(1)LTTTGQVTSPVK	-0.36312	1				1			1.18433	0.828606	0.963887	1.2832	0.8262	0.913782				0.779
P49959	673	K	Double-strand break repair protein MRE11 OS=Homo sapiens OX=9606 GN=MRE11 PE=1 SV=3	MRE11	1	1.70797e-12	129.04	2	WSSTSSSK(1)IMSQSQVSK	-1.0031	2				0.576073		1.42393	1.04991	0.950009	0.983366	1.07479	0.925749	1.01618				0.536		1.401
P50238	22	K	Cysteine-rich protein 1 OS=Homo sapiens OX=9606 GN=CRIP1 PE=1 SV=3	CRIP1	1	0.000266437	102.55	3	VTSLGK(1)DWHRPCLK	0.44026	8	0.852833	1.26999	0.736814	1.06205	1.13841	0.939901	0.841902	1.07346	0.799659	0.930998	1.3198	1.03418	1.013	1.183	0.921	1.141	0.863	0.909	0.935	0.568632
P50402	79	K	Emerin OS=Homo sapiens OX=9606 GN=EMD PE=1 SV=1	EMD	1	0.000179886	115.41	2	K(1)EDALLYQSK	0.089228	6	1.01152	0.885769	0.848769	1.41771	0.962957	0.873281	1.08035	0.931981	0.955786	1.15874	0.932842	0.940304	0.936	0.95	0.888	1.223	1.032	0.929	1.148	0.186145
P50402	37	K	Emerin OS=Homo sapiens OX=9606 GN=EMD PE=1 SV=1	EMD	1	0.00161589	63.397	2	K(1)IFEYETQR	-2.2798	3		0.658266	0.663375	1.67836			1.08035	0.931981	0.955786	1.15874	0.932842	0.940304		0.706	0.694	1.448			2.069
P50479	206	K	PDZ and LIM domain protein 4 OS=Homo sapiens OX=9606 GN=PDLIM4 PE=1 SV=2	PDLIM4	1	7.2816e-05	57.042	2	EPAEPVAAEPK(1)QSGSFR	2.2132	1	1						1.49426	0.855667	0.815953	0.984438	0.836061	1.01362	0.669
P50479	241	K	PDZ and LIM domain protein 4 OS=Homo sapiens OX=9606 GN=PDLIM4 PE=1 SV=2	PDLIM4	0.991823	6.02793e-16	125.77	3	NLK(0.008)PTASK(0.992)LGAPLSGLQGLPECTR	0.36036	4	1.07763	1.0049		1.31872		0.598752	1.49426	0.855667	0.815953	0.984438	0.836061	1.01362	0.721	1.174		1.34		0.591	1.019	0.950656
Q8IZP2	149	K	Putative protein FAM10A4 OS=Homo sapiens OX=9606 GN=ST13P4 PE=5 SV=1	ST13P4	1	0.0310567	44.42	2	LAILYAK(1)R	-0.93863	1				1
P50613	328	K	Cyclin-dependent kinase 7 OS=Homo sapiens OX=9606 GN=CDK7 PE=1 SV=1	CDK7	1	2.37385e-05	131.22	2	EQSNPALAIK(1)R	-0.15368	6	0.775831	1.1371	0.992764	0.852539	1.12767	1.11409	1.01292	1.09085	1.06702	0.887394	1.01485	0.926969	0.766	1.042	0.93	0.961	1.111	1.202	1.196	0.176111
P50851	1160	K	Lipopolysaccharide-responsive and beige-like anchor protein OS=Homo sapiens OX=9606 GN=LRBA PE=1 SV=4	LRBA	1	0.0459324	50.834	2	LIFQEGK(1)PVTEK	-9.9237	1			1				1.29501	0.826245	0.89954	1.38035	0.761809	0.837042			1.112
P50990	16	K	T-complex protein 1 subunit theta OS=Homo sapiens OX=9606 GN=CCT8 PE=1 SV=4	CCT8	1	0.000100029	81.799	2	APGFAQMLK(1)EGAK	0.23486	6	1.18481	1.16131	1.10142	1.0873	0.652589	0.81257	0.988112	0.950721	1.05136	0.992459	0.970503	1.04685	1.199	1.222	1.048	1.096	0.672	0.776	0.733	0.0976116
P50990	400	K	T-complex protein 1 subunit theta OS=Homo sapiens OX=9606 GN=CCT8 PE=1 SV=4	CCT8	1	0.00028111	81.48	2	AVDDGVNTFK(1)VLTR	1.508	1				1			0.988112	0.950721	1.05136	0.992459	0.970503	1.04685				1.008
P50990	326	K	T-complex protein 1 subunit theta OS=Homo sapiens OX=9606 GN=CCT8 PE=1 SV=4	CCT8	1	0.000705676	83.438	2	LCK(1)TVGATALPR	0.3986	3	1.07275	0.520939		1.40631			0.988112	0.950721	1.05136	0.992459	0.970503	1.04685	1.086	0.548		1.417			1.734
P50991	292	K	T-complex protein 1 subunit delta OS=Homo sapiens OX=9606 GN=CCT4 PE=1 SV=4	CCT4	1	0.00494026	76.572	2	K(1)TGCNVLLIQK	-1.8318	2		0.736122	1.26388				0.937426	1.02545	1.08627	0.945134	1.00153	1.00419		0.718	1.164
P51003	650	K	Poly(A) polymerase alpha OS=Homo sapiens OX=9606 GN=PAPOLA PE=1 SV=4	PAPOLA	1	0.0881777	40.502	2	IPTPIVGVK(1)R	0.99389	1				1			0.972635	0.942077	1.04678	1.00648	0.97486	1.05716				0.994
P51003	641	K	Poly(A) polymerase alpha OS=Homo sapiens OX=9606 GN=PAPOLA PE=1 SV=4	PAPOLA	1	2.07054e-15	85.443	2	SSGNAATSGNAATK(1)IPTPIVGVK	0.48263	1				1			0.972635	0.942077	1.04678	1.00648	0.97486	1.05716				0.994
P51153	3	K	Ras-related protein Rab-13 OS=Homo sapiens OX=9606 GN=RAB13 PE=1 SV=1	RAB13	1	0.0132725	55.235	2	AK(1)AYDHLFK	0.38818	1				1			1.25889	0.635288	0.984058	1.18142	0.968658	0.971687				0.846
P51608	210	K	Methyl-CpG-binding protein 2 OS=Homo sapiens OX=9606 GN=MECP2 PE=1 SV=1	MECP2	1	5.65503e-07	188.98	2	AATSEGVQVK(1)R	-3.3233	5	0.959477	1.10888	0.808345	1.21347	0.90983		1.13239	0.990184	0.828419	1.21965	0.948358	0.880997	0.847	1.12	0.976	0.995	0.959		0.996	0.984362
P51608	249	K	Methyl-CpG-binding protein 2 OS=Homo sapiens OX=9606 GN=MECP2 PE=1 SV=1	MECP2	1	4.71949e-36	205.26	2	AEGGGATTSTQVMVIK(1)R	-0.12476	6	0.876906	0.517796	0.694246	2.07784	0.583195	1.25001	1.13239	0.990184	0.828419	1.21965	0.948358	0.880997	0.774	0.523	0.838	1.704	0.615	1.419	1.751	0.227471
P51608	435	K	Methyl-CpG-binding protein 2 OS=Homo sapiens OX=9606 GN=MECP2 PE=1 SV=1	MECP2	1	8.43856e-22	155.61	2	EPAK(1)TQPAVATAATAAEK	-0.36128	6	1.23037	1.31157	0.623661	1.1707	1.09004	0.573659	1.13239	0.990184	0.828419	1.21965	0.948358	0.880997	1.087	1.325	0.753	0.96	1.149	0.651	0.872	0.590982
P51608	449	K	Methyl-CpG-binding protein 2 OS=Homo sapiens OX=9606 GN=MECP2 PE=1 SV=1	MECP2	1	2.03622e-12	155.57	2	TQPAVATAATAAEK(1)YK	0.29159	10	0.979537	1.00476	0.781206	1.60211	0.903711	0.728669	1.13239	0.990184	0.828419	1.21965	0.948358	0.880997	0.865	1.015	0.943	1.314	0.953	0.827	1.096	0.633005
P51608	331	K	Methyl-CpG-binding protein 2 OS=Homo sapiens OX=9606 GN=MECP2 PE=1 SV=1	MECP2	1	2.69558e-06	110.06	2	EVVKPLLVSTLGEK(1)SGK	-0.3715	10	1.19681	1.03452	0.702799	1.30477	0.772773	0.988328	1.13239	0.990184	0.828419	1.21965	0.948358	0.880997	1.057	1.045	0.848	1.07	0.815	1.122	1.019	0.911346
P51608	200	K	Methyl-CpG-binding protein 2 OS=Homo sapiens OX=9606 GN=MECP2 PE=1 SV=1	MECP2	1	6.6884e-08	166.65	2	PK(1)AATSEGVQVK	0.06867	7	0.938509	1.03918	0.682997	1.4521	0.958745	0.928472	1.13239	0.990184	0.828419	1.21965	0.948358	0.880997	0.829	1.049	0.824	1.191	1.011	1.054	1.205	0.111118
P51608	256	K	Methyl-CpG-binding protein 2 OS=Homo sapiens OX=9606 GN=MECP2 PE=1 SV=1	MECP2	1	0.000206035	113.46	2	K(1)AEADPQAIPK	-0.59619	6	0.877579	1.2825	0.872501	0.922126	0.99565	1.04964	1.13239	0.990184	0.828419	1.21965	0.948358	0.880997	0.775	1.295	1.053	0.756	1.05	1.191	0.96	0.862753
P51608	266	K	Methyl-CpG-binding protein 2 OS=Homo sapiens OX=9606 GN=MECP2 PE=1 SV=1	MECP2	1	0.00867963	86.243	2	KAEADPQAIPK(1)K	-0.0038012	4		1.02015		1.41602	0.780408	0.783429	1.13239	0.990184	0.828419	1.21965	0.948358	0.880997		1.03		1.161	0.823	0.889	0.93
P51608	459	K	Methyl-CpG-binding protein 2 OS=Homo sapiens OX=9606 GN=MECP2 PE=1 SV=1	MECP2	1	0.00253517	81.099	2	K(1)DIVSSSMPR	-0.40649	4		0.964751		1.40927	0.798529	0.82745	1.13239	0.990184	0.828419	1.21965	0.948358	0.880997		0.974		1.155	0.842	0.939	1.005
P51608	271	K	Methyl-CpG-binding protein 2 OS=Homo sapiens OX=9606 GN=MECP2 PE=1 SV=1	MECP2	1	3.41375e-05	97.084	2	K(1)PGSVVAAAAAEAK	0.16546	5	1.1541	1.31864	0.598506		0.927299	1.00145	1.13239	0.990184	0.828419	1.21965	0.948358	0.880997	1.019	1.332	0.722		0.978	1.137	1.032	0.815999
P51608	284	K	Methyl-CpG-binding protein 2 OS=Homo sapiens OX=9606 GN=MECP2 PE=1 SV=1	MECP2	1	4.02599e-05	105.78	2	KPGSVVAAAAAEAK(1)K	-0.27268	6	1.23902	1.00678	0.76872	1.36588	0.910448	0.709153	1.13239	0.990184	0.828419	1.21965	0.948358	0.880997	1.094	1.017	0.928	1.12	0.96	0.805	0.949	0.610696
P51608	22	K	Methyl-CpG-binding protein 2 OS=Homo sapiens OX=9606 GN=MECP2 PE=1 SV=1	MECP2	0.99884	1.43686e-12	142.08	2	SEDQDLQGLK(0.999)DK(0.001)PLK	-0.36066	6	1.1113	1.41282	0.558416	1.13523	0.995987	0.786245	1.13239	0.990184	0.828419	1.21965	0.948358	0.880997	0.981	1.427	0.674	0.931	1.05	0.892	0.932	0.911439
P51608	304	K	Methyl-CpG-binding protein 2 OS=Homo sapiens OX=9606 GN=MECP2 PE=1 SV=1	MECP2	1	0.000140367	65.933	2	SVQETVLPIK(1)K	-0.88974	6	1.17279	1.03165	0.733923	1.55113	0.807186	0.703326	1.13239	0.990184	0.828419	1.21965	0.948358	0.880997	1.036	1.042	0.886	1.272	0.851	0.798	0.985	0.837575
P51610	836	K	Host cell factor 1 OS=Homo sapiens OX=9606 GN=HCFC1 PE=1 SV=2	HCFC1	1	4.67001e-34	148.7	3	IATGHGQQGVTQVVLK(1)GAPGQPGTILR	1.8215	6	0.749669	1.14986	0.814545	1.57579	0.931038	0.779099	0.919483	1.02129	1.00981	0.954269	1.01187	1.08328	0.815	1.126	0.807	1.651	0.92	0.719	1.197	0.656242
P51610	820	K	Host cell factor 1 OS=Homo sapiens OX=9606 GN=HCFC1 PE=1 SV=2	HCFC1	1	4.25337e-11	123.92	3	IITAVPK(1)IATGHGQQGVTQVVLK	0.4182	6	0.84835	1.3925	0.831301	0.962219	1.11411	0.851528	0.919483	1.02129	1.00981	0.954269	1.01187	1.08328	0.923	1.363	0.823	1.008	1.101	0.786	0.931	0.770528
P51610	345	K	Host cell factor 1 OS=Homo sapiens OX=9606 GN=HCFC1 PE=1 SV=2	HCFC1	1	9.30347e-05	133.68	2	K(1)AWNNQVCCK	-0.28997	6	1.29674	0.901222	0.78545	1.36247	0.714344	0.939775	0.919483	1.02129	1.00981	0.954269	1.01187	1.08328	1.41	0.882	0.778	1.428	0.706	0.868	0.978	0.909475
P51610	2024	K	Host cell factor 1 OS=Homo sapiens OX=9606 GN=HCFC1 PE=1 SV=2	HCFC1	1	0.00093428	101.64	3	RPMSSPEMK(1)SAPK	1.301	6		0.918137	1.15631	1.41774	0.719495	0.788325	0.919483	1.02129	1.00981	0.954269	1.01187	1.08328		0.899	1.145	1.486	0.711	0.728	0.954	0.774315
P51610	813	K	Host cell factor 1 OS=Homo sapiens OX=9606 GN=HCFC1 PE=1 SV=2	HCFC1	1	1.80292e-14	157.52	2	VMTSGTGAPAK(1)IITAVPK	-1.4622	6	1.06018	1.02996	0.888575	1.17842	0.947406	0.895454	0.919483	1.02129	1.00981	0.954269	1.01187	1.08328	1.153	1.008	0.88	1.235	0.936	0.827	0.986	0.88167
P51610	2005	K	Host cell factor 1 OS=Homo sapiens OX=9606 GN=HCFC1 PE=1 SV=2	HCFC1	0.999063	3.60541e-05	73.891	3	WLQETSK(0.999)DSSGTK(0.001)PANK	-0.38408	1			1				0.919483	1.02129	1.00981	0.954269	1.01187	1.08328			0.99
P51858	197	K	Hepatoma-derived growth factor OS=Homo sapiens OX=9606 GN=HDGF PE=1 SV=1	HDGF	1	6.5732e-07	75.312	3	EAATLEVERPLPMEVEK(1)NSTPSEPGSGR	11.231	2	1.05423			0.945775			1.10284	0.888642	0.927386	1.17507	0.907068	0.998992	0.956			0.805			0.842
P51858	11	K	Hepatoma-derived growth factor OS=Homo sapiens OX=9606 GN=HDGF PE=1 SV=1	HDGF	1	0.00102369	83.438	2	EYK(1)CGDLVFAK	1.4848	2				1.80104	0.19896		1.10284	0.888642	0.927386	1.17507	0.907068	0.998992				1.533	0.219
P51858	39	K	Hepatoma-derived growth factor OS=Homo sapiens OX=9606 GN=HDGF PE=1 SV=1	HDGF	1	5.60857e-17	202.72	2	IDEMPEAAVK(1)STANK	1.4089	25	1.03333	1.01944	0.843066	1.19798	0.924228	0.981961	1.10284	0.888642	0.927386	1.17507	0.907068	0.998992	0.937	1.147	0.909	1.02	1.019	0.983	1.01	0.849877
P51858	106	K	Hepatoma-derived growth factor OS=Homo sapiens OX=9606 GN=HDGF PE=1 SV=1	HDGF	1	9.37877e-33	184.37	3	K(1)SCVEEPEPEPEAAEGDGDKK	1.0927	13	1.03123	1.13432	0.826112	1.22647	0.91024	0.871628	1.10284	0.888642	0.927386	1.17507	0.907068	0.998992	0.935	1.276	0.891	1.044	1.003	0.873	0.941	0.707822
P51948	176	K	CDK-activating kinase assembly factor MAT1 OS=Homo sapiens OX=9606 GN=MNAT1 PE=1 SV=1	MNAT1	1	0.000152319	134.66	2	EEQLQQILK(1)R	0.58768	4		1.28701	1.06559		0.870237	0.777171	0.933637	1.03349	0.964622	0.907595	1.14624	1.01441		1.245	1.105		0.759	0.766	0.649	0.0187545
P51965	43	K	Ubiquitin-conjugating enzyme E2 E1 OS=Homo sapiens OX=9606 GN=UBE2E1 PE=1 SV=1	UBE2E1	1	0.000193516	131.22	2	NSK(1)LLSTSAK	0.80581	6	0.720437	1.14228	1.09648	0.790975	1.13802	1.1118
P52272	388	K	Heterogeneous nuclear ribonucleoprotein M OS=Homo sapiens OX=9606 GN=HNRNPM PE=1 SV=3	HNRNPM	1	2.72265e-25	161.93	3	RGEIIAK(1)QGGGGGGGSVPGIER	0.069501	12	1.06384	0.990357	0.737158	1.56891	0.832667	0.807066	0.922534	0.989608	1.04751	0.996765	0.978027	1.06555	1.153	1.001	0.704	1.574	0.851	0.757	1.113	0.798253
P52272	381	K	Heterogeneous nuclear ribonucleoprotein M OS=Homo sapiens OX=9606 GN=HNRNPM PE=1 SV=3	HNRNPM	1	8.11554e-05	117.3	2	INEILSNALK(1)R	0.34174	6	1.02091	0.853491	0.849691	1.54064	0.864211	0.871058	0.922534	0.989608	1.04751	0.996765	0.978027	1.06555	1.107	0.862	0.811	1.546	0.884	0.817	1.168	0.61159
P52272	651	K	Heterogeneous nuclear ribonucleoprotein M OS=Homo sapiens OX=9606 GN=HNRNPM PE=1 SV=3	HNRNPM	1	0.000683631	113.1	2	K(1)ACQIFVR	0.82692	6	1.02266	1.20433	0.954394	1.19387	0.792129	0.832617	0.922534	0.989608	1.04751	0.996765	0.978027	1.06555	1.109	1.217	0.911	1.198	0.81	0.781	0.862	0.374104
P52294	17	K	Importin subunit alpha-5 OS=Homo sapiens OX=9606 GN=KPNA1 PE=1 SV=3	KPNA1	1	0.000314059	107.08	2	NK(1)SLNPDEMR	1.5244	11	0.644667	1.23138	1.13078	0.914694	0.904924	1.17356	0.915326	1.05673	1.05687	0.856833	1.06044	1.05381	0.704	1.165	1.07	1.068	0.853	1.114	1.033	0.797126
P52298	151	K	Nuclear cap-binding protein subunit 2 OS=Homo sapiens OX=9606 GN=NCBP2 PE=1 SV=1	NCBP2	1	0.00705982	82.716	2	GGYGK(1)LAQNQ	-0.16457	2		1.14079	0.859211					0.898596	1.15742	0.896873	0.861199	1.18591		1.27	0.742
P52298	78	K	Nuclear cap-binding protein subunit 2 OS=Homo sapiens OX=9606 GN=NCBP2 PE=1 SV=1	NCBP2	1	2.06118e-10	103.23	2	K(1)TACGFCFVEYYSR	-0.13141	6	0.657455	0.953164	1.15944	1.99023		0.239708		0.898596	1.15742	0.896873	0.861199	1.18591		1.061	1.002	2.219		0.202	1.174	0.753137
P52594	175	K	Arf-GAP domain and FG repeat-containing protein 1 OS=Homo sapiens OX=9606 GN=AGFG1 PE=1 SV=2	AGFG1	1	1.16873e-30	112.75	3	SLLGDSAPTLHLNK(1)GTPSQSPVVGR	0.95713	2	1.50082			0.499182			1.05229	0.857005	0.895088	1.17435	0.972414	1.04885	1.426			0.425			0.298
P52594	313	K	Arf-GAP domain and FG repeat-containing protein 1 OS=Homo sapiens OX=9606 GN=AGFG1 PE=1 SV=2	AGFG1	1	2.21027e-34	97.59	3	SSSADFGTFNTSQSHQTASAVSK(1)VSTNK	1.4659	1				1			1.05229	0.857005	0.895088	1.17435	0.972414	1.04885				0.852
P52594	318	K	Arf-GAP domain and FG repeat-containing protein 1 OS=Homo sapiens OX=9606 GN=AGFG1 PE=1 SV=2	AGFG1	1	6.78871e-05	119.43	2	VSTNK(1)AGLQTADK	1.1367	6	1.31934	0.877584	0.840616	1.20931	0.856912	0.896232	1.05229	0.857005	0.895088	1.17435	0.972414	1.04885	1.254	1.024	0.939	1.03	0.881	0.854	0.859	0.22754
P52597	200	K	Heterogeneous nuclear ribonucleoprotein F OS=Homo sapiens OX=9606 GN=HNRNPF PE=1 SV=3	HNRNPF	1	3.60543e-06	82.437	2	SYSDPPLK(1)FMSVQR	-0.21062	1				1			1.0117	0.967538	0.998016	1.06735	0.954626	1.00077				0.937
P52597	224	K	Heterogeneous nuclear ribonucleoprotein F OS=Homo sapiens OX=9606 GN=HNRNPF PE=1 SV=3	HNRNPF	1	9.87012e-06	129.28	2	YIGIVK(1)QAGLER	-0.1735	6	0.811867	1.08181	1.07037	1.03944	0.933425	1.06309	1.0117	0.967538	0.998016	1.06735	0.954626	1.00077	0.802	1.118	1.072	0.974	0.978	1.062	1.007	0.882403
P52701	161	K	DNA mismatch repair protein Msh6 OS=Homo sapiens OX=9606 GN=MSH6 PE=1 SV=2	MSH6	0.992844	0.0101049	44.571	3	EAQK(0.993)GGHFYSAK(0.007)PEILR	-0.47201	1				1			0.857045	1.0662	1.02358	0.903829	1.04842	1.10093				1.106
P52701	324	K	DNA mismatch repair protein Msh6 OS=Homo sapiens OX=9606 GN=MSH6 PE=1 SV=2	MSH6	1	1.91817e-18	155.34	2	ETPSATK(1)QATSISSETK	-1.3451	3	0.767956	1.3927			0.839345		0.857045	1.0662	1.02358	0.903829	1.04842	1.10093	0.896	1.306			0.801		0.728
P52701	22	K	DNA mismatch repair protein Msh6 OS=Homo sapiens OX=9606 GN=MSH6 PE=1 SV=2	MSH6	1	6.20257e-05	94.791	2	SPALSDANK(1)ASAR	0.43865	5		1.60698	0.954086	0.907512	0.742849	0.788571	0.857045	1.0662	1.02358	0.903829	1.04842	1.10093		1.507	0.932	1.004	0.709	0.716	0.664	0.187739
P52756	724	K	RNA-binding protein 5 OS=Homo sapiens OX=9606 GN=RBM5 PE=1 SV=2	RBM5	1	1.9017e-14	169.52	2	K(1)QFDAGTVNYEQPTK	0.080214	3		1.35364	0.596928			1.04943		1.03313		0.917473	1.1219	0.927493		1.31				1.131	0.863
P52756	542	K	RNA-binding protein 5 OS=Homo sapiens OX=9606 GN=RBM5 PE=1 SV=2	RBM5	1	0.000627918	71.066	2	TAQQIAK(1)DMER	1.3349	2		1.15336			0.846636			1.03313		0.917473	1.1219	0.927493		1.116			0.755		0.677
P52943	55	K	Cysteine-rich protein 2 OS=Homo sapiens OX=9606 GN=CRIP2 PE=1 SV=1	CRIP2	0.985785	0.00491309	53.21	4	TLTPGGHAEHDGK(0.014)PFCHK(0.986)PCYATLFGPK	1.1833	1					1		0.933094	0.978686	0.844896	1.14219	1.11093	0.990209					0.9
P52943	176	K	Cysteine-rich protein 2 OS=Homo sapiens OX=9606 GN=CRIP2 PE=1 SV=1	CRIP2	1	4.1406e-05	62.304	4	TLTPGGHAEHDGQPYCHK(1)PCYGILFGPK	-0.065172	3				1.50481	0.93693	0.558264	0.933094	0.978686	0.844896	1.14219	1.11093	0.990209				1.317	0.843	0.564
P52943	23	K	Cysteine-rich protein 2 OS=Homo sapiens OX=9606 GN=CRIP2 PE=1 SV=1	CRIP2	1	0.000940499	72.042	2	VSSLGK(1)DWHK	-0.013754	3	0.814933			1.2424	0.942668		0.933094	0.978686	0.844896	1.14219	1.11093	0.990209	0.873			1.088	0.849		1.109
P52943	144	K	Cysteine-rich protein 2 OS=Homo sapiens OX=9606 GN=CRIP2 PE=1 SV=1	CRIP2	1	0.000266437	102.55	2	VTSLGK(1)DWHR	0.74776	6	0.852833	1.26999	0.736814	1.06205	1.13841	0.939901	0.933094	0.978686	0.844896	1.14219	1.11093	0.990209	0.914	1.298	0.872	0.93	1.025	0.949	0.942	0.746209
P52948	1040	K	Nuclear pore complex protein Nup98-Nup96 OS=Homo sapiens OX=9606 GN=NUP98 PE=1 SV=4	NUP98	1	6.62873e-05	126.29	2	LPISASHSSK(1)TR	-0.010111	6	0.975833	1.08749	0.767906	1.15065	0.992294	1.02582	1.02976	0.969677	0.973444	1.01169	0.988671	1.02676	0.948	1.121	0.789	1.137	1.004	0.999	1.099	0.403706
P52948	563	K	Nuclear pore complex protein Nup98-Nup96 OS=Homo sapiens OX=9606 GN=NUP98 PE=1 SV=4	NUP98	1	5.37166e-05	101.64	2	VRPK(1)ALQTTGTAK	-0.88127	6	0.924165	1.06474	1.04979	1.02535	0.955945	0.980012	1.02976	0.969677	0.973444	1.01169	0.988671	1.02676	0.897	1.098	1.078	1.014	0.967	0.954	0.955	0.563673
P53350	9	K	Serine/threonine-protein kinase PLK1 OS=Homo sapiens OX=9606 GN=PLK1 PE=1 SV=1	PLK1	1	3.61342e-05	122.44	2	SAAVTAGK(1)LAR	0.99117	4		1.48185	0.78085		0.961042	0.776258		1.1717	0.848528		1.00335	0.976426		1.265	0.92		0.958	0.795	0.802	0.369447
Q00610	456	K	Clathrin heavy chain 1 OS=Homo sapiens OX=9606 GN=CLTC PE=1 SV=5	CLTC	1	0.00024388	98.167	2	EDK(1)LECSEELGDLVK	0.91305	1		1					1.01805	1.02308	1.01393	1.02881	0.976724	0.939403		0.977
Q00610	737	K	Clathrin heavy chain 1 OS=Homo sapiens OX=9606 GN=CLTC PE=1 SV=5	CLTC	1	0.00051761	83.775	2	YIQAACK(1)TGQIK	0.10831	3	1.50544		0.303793	1.19077			1.01805	1.02308	1.01393	1.02881	0.976724	0.939403	1.479		0.3	1.157			1.301
P53814	668	K	Smoothelin OS=Homo sapiens OX=9606 GN=SMTN PE=1 SV=7	SMTN	1	0.0221042	56.938	2	AADGSAVSTVTK(1)TER	0.53245	1		1					0.479155	1.30695	0.859874		1.35362	1.0004		0.765
P53814	336	K	Smoothelin OS=Homo sapiens OX=9606 GN=SMTN PE=1 SV=7	SMTN	1	0.000445084	71.896	2	VHK(1)FTSDSPMAAR	0.58184	1		1					0.479155	1.30695	0.859874		1.35362	1.0004		0.765
P53999	29	K	Activated RNA polymerase II transcriptional coactivator p15 OS=Homo sapiens OX=9606 GN=SUB1 PE=1 SV=3	SUB1	1	0.000774798	117.3	2	K(1)QVAPEKPVK	-0.60764	6	0.259948	0.87169	0.977348	1.32715	1.30624	1.25763	0.900967	0.989314	1.01735	0.924302	0.988366	1.17971	0.289	0.881	0.961	1.436	1.322	1.066	1.794	0.150676
P53999	35	K	Activated RNA polymerase II transcriptional coactivator p15 OS=Homo sapiens OX=9606 GN=SUB1 PE=1 SV=3	SUB1	1	0.00327125	91.783	2	QVAPEK(1)PVK	-0.14752	6	1.11178	1.09806	0.877191	1.02553	1.09097	0.796462	0.900967	0.989314	1.01735	0.924302	0.988366	1.17971	1.234	1.11	0.862	1.11	1.104	0.675	0.901	0.578186
P54253	712	K	Ataxin-1 OS=Homo sapiens OX=9606 GN=ATXN1 PE=1 SV=2	ATXN1	1	0.000685884	94.791	2	HSK(1)ADGLAGSR	-0.50915	4	0.78729	0.810494		1.60391	0.798301
P54253	346	K	Ataxin-1 OS=Homo sapiens OX=9606 GN=ATXN1 PE=1 SV=2	ATXN1	1	1.83755e-06	112.73	2	YGAPSSADLGLGK(1)AGGK	0.037603	5	1.92927	0.613816		1.3717	0.542978	0.542242
P54577	356	K	Tyrosine--tRNA ligase, cytoplasmic OS=Homo sapiens OX=9606 GN=YARS1 PE=1 SV=4	YARS1	1	2.77246e-13	161.23	2	GPAK(1)NSEPEEVIPSR	-1.1339	4	1.04775	0.65793		2.17454	0.119783		1.3294	0.809809	0.93338	1.38403	0.759319	0.784061	0.788	0.812		1.571	0.158		1.081	0.720152
P54577	146	K	Tyrosine--tRNA ligase, cytoplasmic OS=Homo sapiens OX=9606 GN=YARS1 PE=1 SV=4	YARS1	1	9.57859e-06	160.98	2	LSSVVTQHDSK(1)K	0.3416	1				1			1.3294	0.809809	0.93338	1.38403	0.759319	0.784061				0.723
P55010	413	K	Eukaryotic translation initiation factor 5 OS=Homo sapiens OX=9606 GN=EIF5 PE=1 SV=2	EIF5	1	0.0348731	53.517	2	AASVPK(1)VETVK	-0.96526	2			0.568892	1.43111			0.977239	1.04767	1.00928	1.01521	0.995132	0.95547			0.564	1.41			2.5
P55010	114	K	Eukaryotic translation initiation factor 5 OS=Homo sapiens OX=9606 GN=EIF5 PE=1 SV=2	EIF5	1	4.33822e-06	58.508	3	FVLCPECENPETDLHVNPK(1)K	1.0163	2	1.06754			0.932463			0.977239	1.04767	1.00928	1.01521	0.995132	0.95547	1.092			0.918			0.841
P55039	46	K	Developmentally-regulated GTP-binding protein 2 OS=Homo sapiens OX=9606 GN=DRG2 PE=1 SV=1	DRG2	1	0.00515599	61.577	2	AQLLEPSK(1)SASSK	0.12397	3			0.777002	1.11486	1.10813		1.04414	0.988199	1.00069	1.01062	0.990006	0.966348			0.776	1.103	1.119		1.432
P55081	329	K	Microfibrillar-associated protein 1 OS=Homo sapiens OX=9606 GN=MFAP1 PE=1 SV=2	MFAP1	1	0.0122215	75.243	2	VITNK(1)AVK	0.039703	5	0.903175	0.941087	0.778915	1.40573	0.971088		0.98105	0.914804	0.947995	1.12733	1.00802	1.0208	0.921	1.029	0.822	1.247	0.963		1.196	0.264347
P55081	381	K	Microfibrillar-associated protein 1 OS=Homo sapiens OX=9606 GN=MFAP1 PE=1 SV=2	MFAP1	1	0.0409603	60.709	2	VMQVK(1)NFGR	1.043	3		1.30739	1.10783	0.584786			0.98105	0.914804	0.947995	1.12733	1.00802	1.0208		1.429	1.169	0.519			0.4
P55196	1337	K	Afadin OS=Homo sapiens OX=9606 GN=AFDN PE=1 SV=3	AFDN	1	0.00158983	68.548	2	SVTPASTLTK(1)SGPGR	-0.38129	2				1.09815		0.901854	1.22595	0.884734	0.902269	1.22557	0.870036	0.891439				0.896		1.012
P55199	164	K	RNA polymerase II elongation factor ELL OS=Homo sapiens OX=9606 GN=ELL PE=1 SV=1	ELL	1	0.00620617	57.293	2	K(1)PAPGATDAVPSR	-0.15601	1		1
P55199	190	K	RNA polymerase II elongation factor ELL OS=Homo sapiens OX=9606 GN=ELL PE=1 SV=1	ELL	1	6.49627e-06	81.908	2	K(1)SGASAVSGGSGVSQR	1.7787	1						1
P55201	983	K	Peregrin OS=Homo sapiens OX=9606 GN=BRPF1 PE=1 SV=2	BRPF1	1	0.00734252	92.677	2	K(1)SFLVYR	-2.3496	1				1
P55263	11	K	Adenosine kinase OS=Homo sapiens OX=9606 GN=ADK PE=1 SV=2	ADK	0.9878	6.17011e-05	114.39	2	AAAEEEPK(0.012)PK(0.988)K	-0.27172	6	1.11162	1.11328	0.609801	1.44562	0.991595	0.728088	0.990674	1.00011	0.93959	1.15252	0.992074	0.92504	1.122	1.113	0.649	1.254	1	0.787	1.054	0.785525
P55263	14	K	Adenosine kinase OS=Homo sapiens OX=9606 GN=ADK PE=1 SV=2	ADK	1	0.000296559	72.042	2	LK(1)VEAPQALR	0.55144	5	0.86698	1.01609	0.601711	1.75758	0.757641		0.990674	1.00011	0.93959	1.15252	0.992074	0.92504	0.875	1.016	0.64	1.525	0.764		1.357	0.458838
P55265	637	K	Double-stranded RNA-specific adenosine deaminase OS=Homo sapiens OX=9606 GN=ADAR PE=1 SV=4	ADAR	1	9.90133e-05	92.707	2	LLSK(1)EGPAHEPK	-1.3952	2				1.10278	0.89722		0.898679	1.00202	0.929757	1.053	1.10003	1.01651				1.047	0.816
P55265	326	K	Double-stranded RNA-specific adenosine deaminase OS=Homo sapiens OX=9606 GN=ADAR PE=1 SV=4	ADAR	1	0.00790043	72.492	2	NIGLTK(1)AR	0.68447	3		0.929816		1.20139		0.868791	0.898679	1.00202	0.929757	1.053	1.10003	1.01651		0.928		1.141		0.855	1.075
P55327	163	K	Tumor protein D52 OS=Homo sapiens OX=9606 GN=TPD52 PE=1 SV=2	TPD52	1	0.000175168	69.641	2	ASAAFSSVGSVITK(1)K	1.1174	2				1.31606		0.68394	1.0018	0.917197	0.952876	1.13755	1.02606	0.964521				1.157		0.709
P55327	138	K	Tumor protein D52 OS=Homo sapiens OX=9606 GN=TPD52 PE=1 SV=2	TPD52	1	0.000835721	64.906	2	K(1)TSETLSQAGQK	0.20792	2				1.35388		0.646121	1.0018	0.917197	0.952876	1.13755	1.02606	0.964521				1.19		0.67
P55327	125	K	Tumor protein D52 OS=Homo sapiens OX=9606 GN=TPD52 PE=1 SV=2	TPD52	1	0.000619308	73.502	2	QNIAK(1)GWQDVTATSAYK	-1.0195	2		0.773868			1.22613		1.0018	0.917197	0.952876	1.13755	1.02606	0.964521		0.844			1.195		1.416
P55854	11	K	Small ubiquitin-related modifier 3 OS=Homo sapiens OX=9606 GN=SUMO3 PE=1 SV=2	SUMO3	1	2.8853e-07	163.59	2	EGVK(1)TENDHINLK	0.96653	6	1.07126	1.12934	0.700049	1.26032	0.930232	0.908809
P61956	42	K	Small ubiquitin-related modifier 2 OS=Homo sapiens OX=9606 GN=SUMO2 PE=1 SV=3	SUMO2	1	0.00764823	90.761	2	HTPLSK(1)LMK	0.61173	4		1.18489	0.911699		1.01392	0.8895
P55854	7	K	Small ubiquitin-related modifier 3 OS=Homo sapiens OX=9606 GN=SUMO3 PE=1 SV=2	SUMO3	0.999326	0.000736111	72.365	2	SEEK(0.001)PK(0.999)EGVK	0.48749	2		0.831372		1.16863
P55884	257	K	Eukaryotic translation initiation factor 3 subunit B OS=Homo sapiens OX=9606 GN=EIF3B PE=1 SV=3	EIF3B	1	0.00231529	110.22	2	LDK(1)QHTFR	-0.49972	6	0.816444	1.09725	0.912387	0.895692	1.17947	1.09876	0.921736	1.03261	1.071	0.873866	1.0497	1.05109	0.886	1.063	0.852	1.025	1.124	1.045	1.14	0.14053
P56180	386	K	Putative tyrosine-protein phosphatase TPTE OS=Homo sapiens OX=9606 GN=TPTE PE=1 SV=3	TPTE	0.999976	0.0790666	43.613	3	RTDK(0.5)THSEK(0.5)FQGVK(1)TPSQK	-4.1058	2		1.16916			0.830845
P56211	75	K	cAMP-regulated phosphoprotein 19 OS=Homo sapiens OX=9606 GN=ARPP19 PE=1 SV=2	ARPP19	1	0.00625109	51.872	2	NK(1)QLPTAAPDK	-0.45221	1		1
P56545	6	K	C-terminal-binding protein 2 OS=Homo sapiens OX=9606 GN=CTBP2 PE=1 SV=1	CTBP2	1	0.0100051	66.087	2	ALVDK(1)HK	-0.25309	6	0.913775	0.976677	1.00695	1.04638	0.966436	1.08978	0.837124	0.939157	1.14427	0.838696	1.07835	1.1624	1.092	1.04	0.88	1.248	0.896	0.938	1.023	0.901769
P57081	385	K	tRNA (guanine-N(7)-)-methyltransferase non-catalytic subunit WDR4 OS=Homo sapiens OX=9606 GN=WDR4 PE=1 SV=2	WDR4	1	9.93729e-08	142.36	2	LQQQLEK(1)K	-0.48097	6	1.09959	0.960898	0.956618	1.27892	0.795282	0.908691	1.08253	0.907171	1.05148	1.01133	0.906888	1.0406	1.016	1.059	0.91	1.265	0.877	0.873	1.01	0.979224
Q15366	31	K	Poly(rC)-binding protein 2 OS=Homo sapiens OX=9606 GN=PCBP2 PE=1 SV=1	PCBP2	1	0.0117785	51.864	2	EVGSIIGK(1)K	0.23402	3	1.12523	1.04224				0.832529	0.958779	0.986882	1.0753	0.948952	0.973837	1.05625	1.174	1.056				0.788	0.707
P57772	549	K	Selenocysteine-specific elongation factor OS=Homo sapiens OX=9606 GN=EEFSEC PE=1 SV=4	EEFSEC	1	0.00154934	70.67	2	ILTPALK(1)K	-0.021605	6	1.05806	0.931519	0.693783	1.53995	0.819209	0.957475	0.999698	0.951156	0.900668	1.15345	0.996072	0.998959	1.058	0.979	0.77	1.335	0.822	0.958	1.11	0.621091
P58876	6	K	Histone H2B type 1-D OS=Homo sapiens OX=9606 GN=H2BC5 PE=1 SV=2	H2BC5	1	3.22402e-06	152.17	2	PEPTK(1)SAPAPK	0.37152	6	1.24058	0.885169	0.828667	1.47916	0.740048	0.826373
P60002	15	K	Transcription elongation factor 1 homolog OS=Homo sapiens OX=9606 GN=ELOF1 PE=1 SV=1	ELOF1	1	1.36615e-36	227.73	3	K(1)MTGTLETQFTCPFCNHEK	1.0015	9	1.13007	1.09659	0.531575	1.41253	0.976105	0.853139
P60174	142	K	Triosephosphate isomerase OS=Homo sapiens OX=9606 GN=TPI1 PE=1 SV=4	TPI1	1	1.34932e-07	119.52	2	EAGITEK(1)VVFEQTK	0.32325	2		0.762455		1.23754			0.969572	0.976899	0.983352	1.06422	0.986579	1.01938		0.78		1.163			1.491
P60174	6	K	Triosephosphate isomerase OS=Homo sapiens OX=9606 GN=TPI1 PE=1 SV=4	TPI1	1	0.000309575	82.716	2	K(1)FFVGGNWK	-1.7782	6	1.56186	1.37785	0.612945	1.26485	0.657964	0.524532	0.969572	0.976899	0.983352	1.06422	0.986579	1.01938	1.611	1.41	0.623	1.189	0.667	0.515	0.651	0.34418
P60174	19	K	Triosephosphate isomerase OS=Homo sapiens OX=9606 GN=TPI1 PE=1 SV=4	TPI1	1	0.0113613	63.908	2	K(1)QSLGELIGTLNAAK	0.17257	1	1						0.969572	0.976899	0.983352	1.06422	0.986579	1.01938	1.031
P60174	188	K	Triosephosphate isomerase OS=Homo sapiens OX=9606 GN=TPI1 PE=1 SV=4	TPI1	1	2.33242e-05	100.69	2	TATPQQAQEVHEK(1)LR	-1.5074	1	1						0.969572	0.976899	0.983352	1.06422	0.986579	1.01938	1.031
P60174	156	K	Triosephosphate isomerase OS=Homo sapiens OX=9606 GN=TPI1 PE=1 SV=4	TPI1	1	0.00517061	63.212	2	VIADNVK(1)DWSK	0.086465	3	0.909993		0.688003	1.402			0.969572	0.976899	0.983352	1.06422	0.986579	1.01938	0.939		0.7	1.317			1.607
P60660	81	K	Myosin light polypeptide 6 OS=Homo sapiens OX=9606 GN=MYL6 PE=1 SV=2	MYL6	1	9.25749e-50	250.16	2	NK(1)DQGTYEDYVEGLR	0.16851	6	1.82714	1.34077	0.625885	0.95391	0.639817	0.612471	0.997455	0.977221	1.01834	0.951626	1.01844	1.03692	1.832	1.372	0.615	1.002	0.628	0.591	0.582	0.26492
P60660	56	K	Myosin light polypeptide 6 OS=Homo sapiens OX=9606 GN=MYL6 PE=1 SV=2	MYL6	1	0.015339	57.293	2	VLGNPK(1)SDEMNVK	-1.2347	1		1					0.997455	0.977221	1.01834	0.951626	1.01844	1.03692		1.023
P60709	61	K	Actin, cytoplasmic 1 OS=Homo sapiens OX=9606 GN=ACTB PE=1 SV=1	ACTB	1	1.64583e-23	241.63	2	DSYVGDEAQSK(1)R	0.89686	13	1.78296	0.804353	0.832003	1.30412	0.515017	0.761542	1.03212	0.99395	0.969336	1.01175	1.06782	0.925023	1.727	0.809	0.858	1.289	0.482	0.823	0.764	0.490344
P60709	326	K	Actin, cytoplasmic 1 OS=Homo sapiens OX=9606 GN=ACTB PE=1 SV=1	ACTB	1	6.5569e-05	96.957	2	EITALAPSTMK(1)IK	-0.88687	7	1.84897	0.89798	0.55963	1.57533	0.609254	0.508827	1.03212	0.99395	0.969336	1.01175	1.06782	0.925023	1.791	0.903	0.577	1.557	0.571	0.55	0.819	0.673013
P60709	328	K	Actin, cytoplasmic 1 OS=Homo sapiens OX=9606 GN=ACTB PE=1 SV=1	ACTB	1	0.000339491	114.64	2	IK(1)IIAPPER	0.89829	6	1.4667	0.824758	0.715766	1.66391	0.670531	0.658336	1.03212	0.99395	0.969336	1.01175	1.06782	0.925023	1.421	0.83	0.738	1.645	0.628	0.712	0.999	0.884727
P60709	215	K	Actin, cytoplasmic 1 OS=Homo sapiens OX=9606 GN=ACTB PE=1 SV=1	ACTB	1	0.000170263	50.515	3	EK(1)LCYVALDFEQEMATAASSSSLEK	2.2864	1		1					1.03212	0.99395	0.969336	1.01175	1.06782	0.925023		1.006
P60709	68	K	Actin, cytoplasmic 1 OS=Homo sapiens OX=9606 GN=ACTB PE=1 SV=1	ACTB	1	0.0023059	47.491	3	GILTLK(1)YPIEHGIVTNWDDMEK	0.29552	1		1					1.03212	0.99395	0.969336	1.01175	1.06782	0.925023		1.006
P60709	50	K	Actin, cytoplasmic 1 OS=Homo sapiens OX=9606 GN=ACTB PE=1 SV=1	ACTB	1	3.3738e-62	266.27	3	HQGVMVGMGQK(1)DSYVGDEAQSK	-0.31082	7	1.15965	1.0142	0.72676	1.33697	0.926406	0.836013	1.03212	0.99395	0.969336	1.01175	1.06782	0.925023	1.124	1.02	0.75	1.321	0.868	0.904	1.069	0.748019
P60709	315	K	Actin, cytoplasmic 1 OS=Homo sapiens OX=9606 GN=ACTB PE=1 SV=1	ACTB	1	6.76455e-08	126.21	2	MQK(1)EITALAPSTMK	-1.6349	12	1.52337	1.09208	1.07229	0.781873	0.757908	0.772474	1.03212	0.99395	0.969336	1.01175	1.06782	0.925023	1.476	1.099	1.106	0.773	0.71	0.835	0.63	0.0135434
P60709	113	K	Actin, cytoplasmic 1 OS=Homo sapiens OX=9606 GN=ACTB PE=1 SV=1	ACTB	1	9.24825e-20	188.19	3	VAPEEHPVLLTEAPLNPK(1)ANR	0.41894	7	1.48065	1.06304	0.812391	1.16008	0.789743	0.694094	1.03212	0.99395	0.969336	1.01175	1.06782	0.925023	1.435	1.07	0.838	1.147	0.74	0.75	0.789	0.330305
P60842	146	K	Eukaryotic initiation factor 4A-I OS=Homo sapiens OX=9606 GN=EIF4A1 PE=1 SV=1	EIF4A1	1	1.09144e-08	74.643	3	AEVQK(1)LQMEAPHIIVGTPGR	-0.2886	3		1.90514			0.946625	0.14824	0.996936	1.02336	1.08486	0.89389	0.979225	1.02174		1.862			0.967	0.145	0.299
P60842	238	K	Eukaryotic initiation factor 4A-I OS=Homo sapiens OX=9606 GN=EIF4A1 PE=1 SV=1	EIF4A1	1	0.000244052	81.335	2	K(1)EELTLEGIR	-0.63441	6	1.41789	1.17356	0.869997	1.01179	0.621897	0.904876	0.996936	1.02336	1.08486	0.89389	0.979225	1.02174	1.422	1.147	0.802	1.132	0.635	0.886	0.787	0.367877
P60842	174	K	Eukaryotic initiation factor 4A-I OS=Homo sapiens OX=9606 GN=EIF4A1 PE=1 SV=1	EIF4A1	1	0.00248377	62.88	2	YLSPK(1)YIK	0.56451	5		1.09279	0.881471	1.3845	0.844743	0.796498	0.996936	1.02336	1.08486	0.89389	0.979225	1.02174		1.068	0.813	1.549	0.863	0.78	1.131	0.792507
P60866	8	K	40S ribosomal protein S20 OS=Homo sapiens OX=9606 GN=RPS20 PE=1 SV=1	RPS20	1	2.06384e-30	181.87	2	DTGK(1)TPVEPEVAIHR	-0.74092	12	0.839954	1.15273	0.696086	1.16162	1.14043	1.00919	1.02744	0.95073	1.02215	1.01812	0.985106	0.996459	0.818	1.212	0.681	1.141	1.158	1.013	1.222	0.262924
P60900	45	K	Proteasome subunit alpha type-6 OS=Homo sapiens OX=9606 GN=PSMA6 PE=1 SV=1	PSMA6	1	0.0268755	43.613	2	GK(1)DCAVIVTQK	-2.9655	1		1					0.996798	1.05376	0.963106	0.945397	1.00572	1.03522		0.949
P60903	28	K	Protein S100-A10 OS=Homo sapiens OX=9606 GN=S100A10 PE=1 SV=2	S100A10	1	0.000353892	105.81	2	GYLTK(1)EDLR	0.28397	6	1.04611	1.37837	0.844267	0.996915	0.872068	0.862267	0.823787	1.03313	0.972831	1.07265	1.06615	1.03145	1.27	1.334	0.868	0.929	0.818	0.836	0.744	0.118939
P60903	57	K	Protein S100-A10 OS=Homo sapiens OX=9606 GN=S100A10 PE=1 SV=2	S100A10	1	0.000368559	96.311	2	IMK(1)DLDQCR	0.7995	6	0.976476	1.22706	0.774388	1.33663	0.820013	0.865432	0.823787	1.03313	0.972831	1.07265	1.06615	1.03145	1.185	1.188	0.796	1.246	0.769	0.839	0.901	0.608307
P60981	44	K	Destrin OS=Homo sapiens OX=9606 GN=DSTN PE=1 SV=3	DSTN	1	0.00673922	40.386	2	AVIFCLSADK(1)K	-0.14474	1				1			0.926589	1.20824	1.06332	0.851864	1.0429	0.907083				1.174
P60981	22	K	Destrin OS=Homo sapiens OX=9606 GN=DSTN PE=1 SV=3	DSTN	1	0.00023302	134.66	2	K(1)CSTPEEIK	0.20677	11	0.938046	1.00657	0.841163	1.31508	0.958468	0.940676	0.926589	1.20824	1.06332	0.851864	1.0429	0.907083	1.012	0.833	0.791	1.544	0.919	1.037	1.328	0.203551
P60983	25	K	Glia maturation factor beta OS=Homo sapiens OX=9606 GN=GMFB PE=1 SV=2	GMFB	1	2.08789e-10	167.06	2	K(1)ETNNAAIIMK	-0.47124	6	1.00689	1.05146	0.851708	1.23211	0.934215	0.923627	1.06098	1.01154	0.995632	0.964064	0.986406	0.981385	0.949	1.039	0.855	1.278	0.947	0.941	1.114	0.434841
P61081	8	K	NEDD8-conjugating enzyme Ubc12 OS=Homo sapiens OX=9606 GN=UBE2M PE=1 SV=1	UBE2M	1	0.0172447	78.178	2	LFSLK(1)QQK	0.46029	2			0.734187		1.26581		1.15821	0.966252	1.0314	1.05288	0.873706	0.917544			0.712		1.449		2.035
P61086	18	K	Ubiquitin-conjugating enzyme E2 K OS=Homo sapiens OX=9606 GN=UBE2K PE=1 SV=3	UBE2K	1	0.024242	47.561	2	EVLK(1)SEETSK	1.5108	1		1					0.961309	0.988004	1.07327	0.938861	0.995004	1.04356		1.012
P61088	92	K	Ubiquitin-conjugating enzyme E2 N OS=Homo sapiens OX=9606 GN=UBE2N PE=1 SV=1	UBE2N	1	0.00109859	81.642	2	ICLDILK(1)DK	0.50908	5	0.485444	1.59425	1.30719	1.02947		0.583637	0.925045	1.04609	1.03388	1.00496	0.984814	1.00521	0.525	1.524	1.264	1.024		0.581	0.727	0.617032
P61088	10	K	Ubiquitin-conjugating enzyme E2 N OS=Homo sapiens OX=9606 GN=UBE2N PE=1 SV=1	UBE2N	1	0.0415965	56.091	2	IIK(1)ETQR	0.7559	1				1			0.925045	1.04609	1.03388	1.00496	0.984814	1.00521				0.995
P61160	46	K	Actin-related protein 2 OS=Homo sapiens OX=9606 GN=ACTR2 PE=1 SV=1	ACTR2	1	0.0121221	45.939	2	STTK(1)VGNIEIK	-1.4614	3	1.15671		0.850828			0.992462	1.02154	0.982445	1.0245	1.00818	0.94829	1.01505	1.132		0.83			0.978	0.997
P61221	181	K	ATP-binding cassette sub-family E member 1 OS=Homo sapiens OX=9606 GN=ABCE1 PE=1 SV=1	ABCE1	1	0.000110995	101.45	2	AAK(1)GTVGSILDR	-0.63644	6	1.2562	0.731177	0.491257	2.01395	0.755411	0.752008	1.01279	0.970193	1.00263	1.01507	0.997483	1.00183	1.24	0.754	0.49	1.984	0.757	0.751	1.406	0.513602
P61247	249	K	40S ribosomal protein S3a OS=Homo sapiens OX=9606 GN=RPS3A PE=1 SV=2	RPS3A	1	0.000585461	86.243	2	ATGDETGAK(1)VER	0.26059	5		1.0848	0.515509	1.59317	1.2088	0.597722	1.02398	0.972341	1.03384	1.03167	0.957793	0.980369		1.116	0.499	1.544	1.262	0.61	1.41	0.51161
P61247	220	K	40S ribosomal protein S3a OS=Homo sapiens OX=9606 GN=RPS3A PE=1 SV=2	RPS3A	0.882125	0.0306942	85.813	2	K(0.882)PK(0.118)FELGK	-0.27531	3		1.08607		1.02023		0.893704	1.02398	0.972341	1.03384	1.03167	0.957793	0.980369		1.117		0.989		0.912	0.851
P61247	144	K	40S ribosomal protein S3a OS=Homo sapiens OX=9606 GN=RPS3A PE=1 SV=2	RPS3A	1	0.00577491	42.075	2	LFCVGFTK(1)K	0.44357	1				1			1.02398	0.972341	1.03384	1.03167	0.957793	0.980369				0.969
P61247	56	K	40S ribosomal protein S3a OS=Homo sapiens OX=9606 GN=RPS3A PE=1 SV=2	RPS3A	1	1.84924e-05	108.2	2	TQGTK(1)IASDGLK	0.12064	6	0.881253	1.15175	0.864435	0.823591	1.1109	1.16807	1.02398	0.972341	1.03384	1.03167	0.957793	0.980369	0.861	1.185	0.836	0.798	1.16	1.191	1.093	0.642955
P61254	134	K	60S ribosomal protein L26 OS=Homo sapiens OX=9606 GN=RPL26 PE=1 SV=1	RPL26	0.999941	0.000751144	123.42	2	GK(1)YKEETIEK	-0.71947	3		0.837685		1.52094	0.641376
P61254	136	K	60S ribosomal protein L26 OS=Homo sapiens OX=9606 GN=RPL26 PE=1 SV=1	RPL26	1	0.000885239	95.311	2	YK(1)EETIEK	0.84598	6	1.04739	0.982806	0.895268	0.935337	1.11415	1.02504
P61326	16	K	Protein mago nashi homolog OS=Homo sapiens OX=9606 GN=MAGOH PE=1 SV=1	MAGOH	1	3.40266e-45	298.75	3	GK(1)FGHEFLEFEFRPDGK	0.67841	8	1.18875	1.03681	0.697518	1.66225	0.703897	0.710778
P61326	41	K	Protein mago nashi homolog OS=Homo sapiens OX=9606 GN=MAGOH PE=1 SV=1	MAGOH	1	5.88804e-30	256.7	2	YANNSNYK(1)NDVMIR	-0.46239	6	1.21567	1.03273	0.812194	1.38065	0.794269	0.764482
P61353	27	K	60S ribosomal protein L27 OS=Homo sapiens OX=9606 GN=RPL27 PE=1 SV=2	RPL27	1	0.00016019	42.888	3	AVIVK(1)NIDDGTSDRPYSHALVAGIDR	0.87615	1				1			1.06054	0.885814	1.03916	1.05261	0.958543	1.00333				0.95
P61353	93	K	60S ribosomal protein L27 OS=Homo sapiens OX=9606 GN=RPL27 PE=1 SV=2	RPL27	1	0.000579087	97.175	2	YSVDIPLDK(1)TVVNK	0.07703	4	1.56359	0.745605		1.47333		0.217477	1.06054	0.885814	1.03916	1.05261	0.958543	1.00333	1.474	0.842		1.4		0.217	0.698	0.544801
P61604	66	K	10 kDa heat shock protein, mitochondrial OS=Homo sapiens OX=9606 GN=HSPE1 PE=1 SV=2	HSPE1	1	0.0201772	43.613	2	GGEIQPVSVK(1)VGDK	-0.39031	1		1					0.943401	1.0004	1.04441	1.00434	1.02581	0.98164		1
P61604	56	K	10 kDa heat shock protein, mitochondrial OS=Homo sapiens OX=9606 GN=HSPE1 PE=1 SV=2	HSPE1	1	1.73943e-06	157.77	2	GK(1)GGEIQPVSVK	0.66513	6	0.999169	1.14431	0.714709	1.38357	1.04792	0.71032	0.943401	1.0004	1.04441	1.00434	1.02581	0.98164	1.059	1.144	0.684	1.378	1.022	0.724	1.082	0.792158
P61604	8	K	10 kDa heat shock protein, mitochondrial OS=Homo sapiens OX=9606 GN=HSPE1 PE=1 SV=2	HSPE1	1	0.00202187	87.251	2	K(1)FLPLFDR	-1.2765	5	0.909624	1.18757	0.833777	1.03391	1.03511		0.943401	1.0004	1.04441	1.00434	1.02581	0.98164	0.964	1.187	0.798	1.029	1.009		1.037	0.762384
P61956	7	K	Small ubiquitin-related modifier 2 OS=Homo sapiens OX=9606 GN=SUMO2 PE=1 SV=3	SUMO2	0.998983	0.000134113	111.61	2	ADEK(0.001)PK(0.999)EGVK	-1.5698	5	0.935996	1.14862	0.587773	1.22349	1.10412
P61956	11	K	Small ubiquitin-related modifier 2 OS=Homo sapiens OX=9606 GN=SUMO2 PE=1 SV=3	SUMO2	1	2.40865e-49	256.7	2	EGVK(1)TENNDHINLK	1.8268	12	0.898954	1.0401	0.937327	1.26081	0.897499	0.965307
P61978	405	K	Heterogeneous nuclear ribonucleoprotein K OS=Homo sapiens OX=9606 GN=HNRNPK PE=1 SV=1	HNRNPK	1	2.37331e-18	203.52	2	DLAGSIIGK(1)GGQR	0.89633	7	1.50974	1.34148	0.0115881	1.87223	0.00638145	1.25859	0.963952	0.991134	0.999491	1.00711	0.993798	1.04451	1.566	1.353	0.012	1.859	0.006	1.205	1.047	0.934824
P61978	219	K	Heterogeneous nuclear ribonucleoprotein K OS=Homo sapiens OX=9606 GN=HNRNPK PE=1 SV=1	HNRNPK	1	3.25874e-05	99.174	2	IILDLISESPIK(1)GR	0.046787	5	0.80917	1.11277	0.640885	1.83092	0.606252		0.963952	0.991134	0.999491	1.00711	0.993798	1.04451	0.839	1.123	0.641	1.818	0.61		1.399	0.663774
P61978	163	K	Heterogeneous nuclear ribonucleoprotein K OS=Homo sapiens OX=9606 GN=HNRNPK PE=1 SV=1	HNRNPK	1	1.33507e-14	130.78	2	LLIHQSLAGGIIGVK(1)GAK	-0.1344	17	1.07847	0.960979	0.701752	1.54224	0.940748	0.775817	0.963952	0.991134	0.999491	1.00711	0.993798	1.04451	1.119	0.97	0.702	1.531	0.947	0.743	1.154	0.672252
P61978	60	K	Heterogeneous nuclear ribonucleoprotein K OS=Homo sapiens OX=9606 GN=HNRNPK PE=1 SV=1	HNRNPK	1	0.00174428	69.716	2	NAGAVIGK(1)GGK	-0.10457	6	0.893043	1.10079	0.811639	1.12714	1.05955	1.00784	0.963952	0.991134	0.999491	1.00711	0.993798	1.04451	0.926	1.111	0.812	1.119	1.066	0.965	1.106	0.348861
P61978	34	K	Heterogeneous nuclear ribonucleoprotein K OS=Homo sapiens OX=9606 GN=HNRNPK PE=1 SV=1	HNRNPK	1	4.82389e-05	119.94	3	RPAEDMEEEQAFK(1)R	-0.75717	3	0.887719			1.80725		0.30503	0.963952	0.991134	0.999491	1.00711	0.993798	1.04451	0.921			1.794		0.292	1.132
P61981	152	K	14-3-3 protein gamma OS=Homo sapiens OX=9606 GN=YWHAG PE=1 SV=2	YWHAG	1	0.00047665	44.16	3	ATVVESSEK(1)AYSEAHEISK	1.0661	1	1						1.05897	1.03876	0.925962	1.0403	1.01733	0.918666	0.944
P61981	10	K	14-3-3 protein gamma OS=Homo sapiens OX=9606 GN=YWHAG PE=1 SV=2	YWHAG	1	0.00116616	93.561	2	EQLVQK(1)AR	-0.91535	3	1.304	1.09122		0.604784			1.05897	1.03876	0.925962	1.0403	1.01733	0.918666	1.231	1.05		0.581			0.509
P61981	142	K	14-3-3 protein gamma OS=Homo sapiens OX=9606 GN=YWHAG PE=1 SV=2	YWHAG	1	0.000826296	74.849	2	YLAEVATGEK(1)R	-0.50586	4	1.38386	1.12506	0.750739	0.74034			1.05897	1.03876	0.925962	1.0403	1.01733	0.918666	1.307	1.083	0.811	0.712			0.667
P62081	160	K	40S ribosomal protein S7 OS=Homo sapiens OX=9606 GN=RPS7 PE=1 SV=1	RPS7	1	0.000280671	77.157	3	VHLDK(1)AQQNNVEHK	1.9234	3	1.1432	1.22879	0.628014				1.04303	1.01266	1.00285	1.0128	0.986394	0.942263	1.096	1.213	0.626
P62136	305	K	Serine/threonine-protein phosphatase PP1-alpha catalytic subunit OS=Homo sapiens OX=9606 GN=PPP1CA PE=1 SV=1	PPP1CA	1	4.36414e-05	99.174	2	GK(1)YGQFSGLNPGGR	-1.0181	6	1.41118	1.02216	0.887561	0.808564	1.0357	0.834838	0.95826	1.00576	1.05372	0.910377	1.02039	1.0515	1.473	1.016	0.842	0.888	1.015	0.794	0.81	0.351509
P62140	303	K	Serine/threonine-protein phosphatase PP1-beta catalytic subunit OS=Homo sapiens OX=9606 GN=PPP1CB PE=1 SV=3	PPP1CB	1	1.20979e-05	123.42	2	AK(1)YQYGGLNSGR	-0.12026	5	1.02018	1.07647	1.01413		0.930997	0.958222	0.988975	0.993373	1.0285	1.00548	0.983312	1.00036	1.032	1.084	0.986		0.947	0.958	0.921	0.10628
P62191	24	K	26S proteasome regulatory subunit 4 OS=Homo sapiens OX=9606 GN=PSMC1 PE=1 SV=1	PSMC1	1	0.00034207	135.63	2	K(1)YEPPVPTR	0.66001	6	1.00537	0.917748	0.913521	1.42922	0.828226	0.905913	0.90982	1.10957	1.07411	0.832266	1.06342	1.01082	1.105	0.827	0.85	1.717	0.779	0.896	1.219	0.608436
P62241	128	K	40S ribosomal protein S8 OS=Homo sapiens OX=9606 GN=RPS8 PE=1 SV=2	RPS8	1	3.10993e-05	108.24	2	GAK(1)LTPEEEEILNK	-0.1567	4	1.23516	1.1816	0.550883		1.03236		1.03951	0.825353	1.02124	1.10128	0.968869	1.04375	1.188	1.432	0.539		1.066		1.012
P62249	4	K	40S ribosomal protein S16 OS=Homo sapiens OX=9606 GN=RPS16 PE=1 SV=2	RPS16	1	2.61943e-05	115.05	2	PSK(1)GPLQSVQVFGR	0.15345	5		0.938459	0.962452	1.5747	0.839765	0.684625	1.01147	0.877073	1.06112	1.0362	0.960642	1.0535		1.07	0.907	1.52	0.874	0.65	1.026	0.923942
P62258	69	K	14-3-3 protein epsilon OS=Homo sapiens OX=9606 GN=YWHAE PE=1 SV=1	YWHAE	1	7.66315e-08	148.9	2	IISSIEQK(1)EENK	-3.6535	5	1.45313	0.957408		1.24665	0.865333	0.477475	0.994189	0.98173	1.0044	1.04382	0.955188	1.02068	1.462	0.975		1.194	0.906	0.468	0.703	0.37543
P62258	142	K	14-3-3 protein epsilon OS=Homo sapiens OX=9606 GN=YWHAE PE=1 SV=1	YWHAE	1	0.000490012	96.946	2	K(1)EAAENSLVAYK	0.26691	6	1.68491	1.14602	0.432862	1.49502	0.646185	0.594995	0.994189	0.98173	1.0044	1.04382	0.955188	1.02068	1.695	1.167	0.431	1.432	0.677	0.583	0.817	0.79536
P62263	106	K	40S ribosomal protein S14 OS=Homo sapiens OX=9606 GN=RPS14 PE=1 SV=3	RPS14	1	1.22027e-06	106.11	2	TK(1)TPGPGAQSALR	-1.3167	6	0.951314	1.14047	0.986031	0.955504	0.948028	1.01865	0.979226	0.951751	1.01585	1.00609	0.999798	1.04729	0.971	1.198	0.971	0.95	0.948	0.973	0.914	0.296388
P62266	37	K	40S ribosomal protein S23 OS=Homo sapiens OX=9606 GN=RPS23 PE=1 SV=3	RPS23	1	2.74557e-08	174.72	3	AHLGTALK(1)ANPFGGASHAK	0.17198	8	0.944029	1.07102	0.996865	1.05121	0.918112	1.01877	1.01415	0.965471	1.03957	1.02549	0.968873	0.986453	0.931	1.109	0.959	1.025	0.948	1.033	1.002	0.943726
P62266	48	K	40S ribosomal protein S23 OS=Homo sapiens OX=9606 GN=RPS23 PE=1 SV=3	RPS23	1	1.42593e-22	159.83	2	ANPFGGASHAK(1)GIVLEK	-0.85769	6	0.860368	1.10473	0.998945	1.06571	1.05781	0.912439	1.01415	0.965471	1.03957	1.02549	0.968873	0.986453	0.848	1.144	0.961	1.039	1.092	0.925	1.035	0.712559
P62266	29	K	40S ribosomal protein S23 OS=Homo sapiens OX=9606 GN=RPS23 PE=1 SV=3	RPS23	1	0.000313094	98.009	2	K(1)AHLGTALK	-0.47839	6	0.492259	1.01821	1.08527	0.893492	1.19411	1.31667	1.01415	0.965471	1.03957	1.02549	0.968873	0.986453	0.485	1.055	1.044	0.871	1.232	1.335	1.33	0.318386
P62266	135	K	40S ribosomal protein S23 OS=Homo sapiens OX=9606 GN=RPS23 PE=1 SV=3	RPS23	1	0.000436845	61.577	2	VANVSLLALYK(1)GK	-0.18016	2			0.710452	1.28955			1.01415	0.965471	1.03957	1.02549	0.968873	0.986453			0.683	1.257			1.84
P62273	33	K	40S ribosomal protein S29 OS=Homo sapiens OX=9606 GN=RPS29 PE=1 SV=2	RPS29	1	0.0487559	49.058	2	K(1)YGLNMCR	0.1775	1		1					0.973934	0.914203	1.00021	1.0818	0.994024	1.03583		1.094
P62277	34	K	40S ribosomal protein S13 OS=Homo sapiens OX=9606 GN=RPS13 PE=1 SV=2	RPS13	1	0.0427359	57.293	2	LTSDDVK(1)EQIYK	-0.25577	1					1		1.05118	0.978728	1.06893	1.08524	0.937568	0.878351					1.067
P62280	12	K	40S ribosomal protein S11 OS=Homo sapiens OX=9606 GN=RPS11 PE=1 SV=3	RPS11	1	1.0409e-05	141.29	2	AYQK(1)QPTIFQNK	-3.5657	4	1.36612	0.8995		0.956946	0.777438		0.986522	0.898886	1.0145	1.04879	0.986924	1.06437	1.385	1.001		0.912	0.788		0.712	0.206282
P62280	38	K	40S ribosomal protein S11 OS=Homo sapiens OX=9606 GN=RPS11 PE=1 SV=3	RPS11	1	0.000263562	87.251	2	YYK(1)NIGLGFK	-0.038115	6	1.55256	0.92532	0.885797	1.13406	0.695651	0.806612	0.986522	0.898886	1.0145	1.04879	0.986924	1.06437	1.574	1.029	0.873	1.081	0.705	0.758	0.732	0.24604
P62304	12	K	Small nuclear ribonucleoprotein E OS=Homo sapiens OX=9606 GN=SNRPE PE=1 SV=1	SNRPE	1	1.71705e-10	118.91	2	VQK(1)VMVQPINLIFR	0.80437	4	1.51975	1.11581	0.278656	1.08579			1.17208	1.03957	0.844261	0.951073	1.0539	0.939112	1.297	1.073	0.33	1.142			1.269
P62328	32	K	Thymosin beta-4 OS=Homo sapiens OX=9606 GN=TMSB4X PE=1 SV=2	TMSB4X	1	1.14528e-06	112.73	2	NPLPSK(1)ETIEQEK	-0.53723	6	1.11487	1.3458	0.52427	1.10002	1.04531	0.869736
P62328	12	K	Thymosin beta-4 OS=Homo sapiens OX=9606 GN=TMSB4X PE=1 SV=2	TMSB4X	1	3.81485e-08	113.34	2	SDKPDMAEIEK(1)FDK	-0.050155	6	1.44848	1.31831	0.588038	1.16855	0.836558	0.640063
P62328	26	K	Thymosin beta-4 OS=Homo sapiens OX=9606 GN=TMSB4X PE=1 SV=2	TMSB4X	1	1.02706e-06	145.95	2	TETQEK(1)NPLPSK	0.29867	5	1.14238	1.27422		1.05042	0.727258	0.805719
P62424	125	K	60S ribosomal protein L7a OS=Homo sapiens OX=9606 GN=RPL7A PE=1 SV=2	RPL7A	1	0.00153287	81.099	2	AAGK(1)GDVPTK	0.7577	5	0.801489	0.741052		1.3407	1.12249	0.994266	1.05758	0.750978	0.979557	1.21202	0.970348	1.02952	0.758	0.987		1.106	1.157	0.966	1.234	0.171926
P62424	197	K	60S ribosomal protein L7a OS=Homo sapiens OX=9606 GN=RPL7A PE=1 SV=2	RPL7A	1	2.02761e-12	123.99	2	K(1)TCTTVAFTQVNSEDK	-0.29219	4	1.04893	1.50234	0.629499	0.819238			1.05758	0.750978	0.979557	1.21202	0.970348	1.02952	0.992	2.001	0.643	0.676			0.558
P62424	11	K	60S ribosomal protein L7a OS=Homo sapiens OX=9606 GN=RPL7A PE=1 SV=2	RPL7A	1	0.00158341	84.368	2	K(1)VAPAPAVVK	-0.68235	4			1.00176	1.16285	0.959049	0.876336	1.05758	0.750978	0.979557	1.21202	0.970348	1.02952			1.023	0.959	0.988	0.851	0.912
P62424	20	K	60S ribosomal protein L7a OS=Homo sapiens OX=9606 GN=RPL7A PE=1 SV=2	RPL7A	1	0.00709826	56.014	2	VAPAPAVVK(1)K	-0.49721	4	1.14732	0.756486	0.694247	1.40195			1.05758	0.750978	0.979557	1.21202	0.970348	1.02952	1.085	1.007	0.709	1.157			1.239
P62424	26	K	60S ribosomal protein L7a OS=Homo sapiens OX=9606 GN=RPL7A PE=1 SV=2	RPL7A	1	0.00632776	63.397	2	K(1)VVNPLFEK	-0.028655	1				1			1.05758	0.750978	0.979557	1.21202	0.970348	1.02952				0.825
P62633	103	K	CCHC-type zinc finger nucleic acid binding protein OS=Homo sapiens OX=9606 GN=CNBP PE=1 SV=1	CNBP	1	0.000649834	68.49	3	EQCCYNCGK(1)PGHLAR	1.7949	1		1					0.847136	1.10664	1.10724	0.827742	1.05356	1.05768		0.904
P62633	8	K	CCHC-type zinc finger nucleic acid binding protein OS=Homo sapiens OX=9606 GN=CNBP PE=1 SV=1	CNBP	1	0.000129966	100.84	2	SSNECFK(1)CGR	0.54771	3		1.75078		0.503437	0.745786		0.847136	1.10664	1.10724	0.827742	1.05356	1.05768		1.582		0.608	0.708		0.416
P62701	134	K	40S ribosomal protein S4, X isoform OS=Homo sapiens OX=9606 GN=RPS4X PE=1 SV=2	RPS4X	1	4.39673e-05	80.815	3	IFVGTK(1)GIPHLVTHDAR	-1.1475	6	1.51695	1.11507	0.798485	0.90916	0.980591	0.679745	1.01125	0.946437	1.02441	1.04379	0.983235	0.990878	1.5	1.178	0.779	0.871	0.997	0.686	0.739	0.273862
P68133	70	K	Actin, alpha skeletal muscle OS=Homo sapiens OX=9606 GN=ACTA1 PE=1 SV=1	ACTA1	1	3.57015e-06	51.577	3	GILTLK(1)YPIEHGIITNWDDMEK	-0.37428	2	1.58813	0.411868
P62750	14	K	60S ribosomal protein L23a OS=Homo sapiens OX=9606 GN=RPL23A PE=1 SV=1	RPL23A	1	0.00106744	64.064	2	EAPAPPK(1)AEAK	-0.73699	3		1.21062	0.894637			0.894742	1.00671	0.965638	1.03458	1.00869	0.984925	0.99945		1.254	0.865			0.895	0.845
P62750	7	K	60S ribosomal protein L23a OS=Homo sapiens OX=9606 GN=RPL23A PE=1 SV=1	RPL23A	1	0.000770592	118.06	2	K(1)EAPAPPK	0.4643	7	0.365673	1.16977	1.00957	1.37104	1.05371	1.03024	1.00671	0.965638	1.03458	1.00869	0.984925	0.99945	0.363	1.211	0.976	1.359	1.07	1.031	1.357	0.335037
P62750	70	K	60S ribosomal protein L23a OS=Homo sapiens OX=9606 GN=RPL23A PE=1 SV=1	RPL23A	1	0.0324004	60.547	2	NK(1)LDHYAIIK	0.0087103	1				1			1.00671	0.965638	1.03458	1.00869	0.984925	0.99945				0.991
P62753	143	K	40S ribosomal protein S6 OS=Homo sapiens OX=9606 GN=RPS6 PE=1 SV=1	RPS6	1	0.0109602	100.75	2	K(1)LFNLSK	0.13952	4	1.11447	0.902529	0.76855	1.21445			0.957207	0.941198	1.12053	0.914978	0.918518	1.14757	1.164	0.959	0.686	1.327			1.417
P62753	203	K	40S ribosomal protein S6 OS=Homo sapiens OX=9606 GN=RPS6 PE=1 SV=1	RPS6	1	0.00816375	41.796	2	NK(1)EEAAEYAK	-2.315	1					1		0.957207	0.941198	1.12053	0.914978	0.918518	1.14757					1.089
P62805	78	K	Histone H4 OS=Homo sapiens OX=9606 GN=H4C1 PE=1 SV=2	H4C1	1	3.54761e-31	236.03	2	DAVTYTEHAK(1)R	-0.64455	6	1.36575	1.02601	0.805943	0.775253	0.931613	1.09544	0.967457	0.84046	1.03944	1.13748	0.923977	1.09119	1.412	1.221	0.775	0.682	1.008	1.004	0.79	0.378087
P62805	32	K	Histone H4 OS=Homo sapiens OX=9606 GN=H4C1 PE=1 SV=2	H4C1	1	3.18821e-05	115.41	2	DNIQGITK(1)PAIR	0.55854	4		1.15291	0.998155	1.00973	0.839209		0.967457	0.84046	1.03944	1.13748	0.923977	1.09119		1.372	0.96	0.888	0.908		0.77	0.303788
P62805	60	K	Histone H4 OS=Homo sapiens OX=9606 GN=H4C1 PE=1 SV=2	H4C1	1	0.0291601	68.49	2	GVLK(1)VFLENVIR	-0.29763	1				1			0.967457	0.84046	1.03944	1.13748	0.923977	1.09119				0.879
P62805	80	K	Histone H4 OS=Homo sapiens OX=9606 GN=H4C1 PE=1 SV=2	H4C1	1	1.76213e-08	126.48	2	K(1)TVTAMDVVYALK	-0.615	4	1.44477		0.662741	0.940044		0.952444	0.967457	0.84046	1.03944	1.13748	0.923977	1.09119	1.493		0.638	0.826		0.873	0.797	0.774915
P62805	92	K	Histone H4 OS=Homo sapiens OX=9606 GN=H4C1 PE=1 SV=2	H4C1	1	4.64313e-07	147.78	2	TVTAMDVVYALK(1)R	3.0008	6	2.33318	1.36332	0.437045	0.857801	0.522475	0.486178	0.967457	0.84046	1.03944	1.13748	0.923977	1.09119	2.412	1.622	0.42	0.754	0.565	0.446	0.396	0.261445
P62826	134	K	GTP-binding nuclear protein Ran OS=Homo sapiens OX=9606 GN=RAN PE=1 SV=3	RAN	1	3.66681e-07	164.53	2	AK(1)SIVFHR	0.25756	6	1.09702	0.944943	0.904899	1.34049	0.816652	0.896001	0.984592	1.00058	1.03282	0.99723	0.954059	1.03072	1.114	0.944	0.876	1.344	0.856	0.869	1.046	0.876065
P62826	71	K	GTP-binding nuclear protein Ran OS=Homo sapiens OX=9606 GN=RAN PE=1 SV=3	RAN	1	4.00226e-22	144.2	2	FNVWDTAGQEK(1)FGGLR	0.027321	6	1.16857	1.20899	0.654303	1.61933	0.72667	0.622138	0.984592	1.00058	1.03282	0.99723	0.954059	1.03072	1.187	1.208	0.634	1.624	0.762	0.604	0.987	0.867222
P62826	37	K	GTP-binding nuclear protein Ran OS=Homo sapiens OX=9606 GN=RAN PE=1 SV=3	RAN	1	0.000345676	96.311	2	HLTGEFEK(1)K	0.3047	6	1.37223	1.26596	0.792047	1.05841	0.7209	0.790455	0.984592	1.00058	1.03282	0.99723	0.954059	1.03072	1.394	1.265	0.767	1.061	0.756	0.767	0.754	0.290275
P62826	38	K	GTP-binding nuclear protein Ran OS=Homo sapiens OX=9606 GN=RAN PE=1 SV=3	RAN	1	2.13293e-09	98.895	3	K(1)YVATLGVEVHPLVFHTNR	0.59677	4	1.31788	0.99449		1.24868		0.438944	0.984592	1.00058	1.03282	0.99723	0.954059	1.03072	1.339	0.994		1.252		0.426	0.719	0.499487
P62826	142	K	GTP-binding nuclear protein Ran OS=Homo sapiens OX=9606 GN=RAN PE=1 SV=3	RAN	1	1.42316e-10	167.76	2	K(1)NLQYYDISAK	0.030462	11	1.2162	1.04728	0.803112	1.33275	0.829577	0.771081	0.984592	1.00058	1.03282	0.99723	0.954059	1.03072	1.235	1.047	0.778	1.336	0.87	0.748	0.965	0.835962
P62826	99	K	GTP-binding nuclear protein Ran OS=Homo sapiens OX=9606 GN=RAN PE=1 SV=3	RAN	1	0.000145439	120.33	2	VTYK(1)NVPNWHR	-0.96549	5	1.52912	0.894536		1.51724	0.516953	0.54215	0.984592	1.00058	1.03282	0.99723	0.954059	1.03072	1.553	0.894		1.521	0.542	0.526	0.705	0.437464
P62851	43	K	40S ribosomal protein S25 OS=Homo sapiens OX=9606 GN=RPS25 PE=1 SV=1	RPS25	1	0.000150251	101.48	2	DK(1)LNNLVLFDK	0.70263	4	1.16315		0.96022	1.3576		0.519025	1.00517	0.979494	1.03225	1.00046	0.967209	1.01542	1.157		0.93	1.357		0.511	0.895	0.70352
P62851	66	K	40S ribosomal protein S25 OS=Homo sapiens OX=9606 GN=RPS25 PE=1 SV=1	RPS25	1	7.46453e-05	79.235	2	EVPNYK(1)LITPAVVSER	-0.32516	6	1.23472	1.19181	0.659099	1.18635	0.995424	0.732594	1.00517	0.979494	1.03225	1.00046	0.967209	1.01542	1.228	1.217	0.639	1.186	1.029	0.721	0.952	0.922079
P62851	114	K	40S ribosomal protein S25 OS=Homo sapiens OX=9606 GN=RPS25 PE=1 SV=1	RPS25	1	1.85903e-08	142.71	2	NTK(1)GGDAPAAGEDA	-0.60936	5	0.715685	1.26248	0.759037	1.01646	1.24633		1.00517	0.979494	1.03225	1.00046	0.967209	1.01542	0.712	1.289	0.735	1.016	1.289		1.264	0.388029
P62857	10	K	40S ribosomal protein S28 OS=Homo sapiens OX=9606 GN=RPS28 PE=1 SV=1	RPS28	1	0.00490195	88.35	2	VQPIK(1)LAR	-0.93427	6	0.843997	1.29458	0.969823	0.629825	1.05918	1.20259	1.00789	1.00092	1.02284	0.93386	1.01597	1.01852	0.837	1.293	0.948	0.674	1.043	1.181	0.942	0.757762
P62888	9	K	60S ribosomal protein L30 OS=Homo sapiens OX=9606 GN=RPL30 PE=1 SV=2	RPL30	1	0.00032299	112.8	2	K(1)SLESINSR	-2.6249	4	1.025		0.845266	1.26568	0.864053		1.05404	0.979949	1.00051	0.990957	0.964569	1.00998	0.972		0.845	1.277	0.896		1.196	0.475964
P62899	39	K	60S ribosomal protein L31 OS=Homo sapiens OX=9606 GN=RPL31 PE=1 SV=1	RPL31	1	0.0258734	69.093	2	IHGVGFK(1)K	-1.3021	1	1						1.2268	0.848337	0.977745	0.990789	0.936113	1.02021	0.815
P62906	106	K	60S ribosomal protein L10a OS=Homo sapiens OX=9606 GN=RPL10A PE=1 SV=2	RPL10A	1	5.48461e-05	110.58	2	K(1)YDAFLASESLIK	-0.11984	6	1.04143	1.19885	0.70921	1.72283	0.859613	0.468065	1.05967	0.953124	0.983129	1.08973	0.969113	0.945234	0.983	1.258	0.721	1.581	0.887	0.495	1	0.833476
P62913	67	K	60S ribosomal protein L11 OS=Homo sapiens OX=9606 GN=RPL11 PE=1 SV=2	RPL11	1	0.000280302	101.45	3	RNEK(1)IAVHCTVR	-0.30294	6	1.65424	0.948834	0.44051	1.55861		0.397802	1.08055	0.996805	0.972578	1.0384	0.919192	0.992473	1.531	0.952	0.453	1.501		0.401	0.972	0.874481
P62937	44	K	Peptidyl-prolyl cis-trans isomerase A OS=Homo sapiens OX=9606 GN=PPIA PE=1 SV=2	PPIA	1	0.0173946	59.645	2	ALSTGEK(1)GFGYK	-0.40369	1	1						0.846937	0.977726	1.07829	0.89059	1.03716	1.16929	1.181
P62937	49	K	Peptidyl-prolyl cis-trans isomerase A OS=Homo sapiens OX=9606 GN=PPIA PE=1 SV=2	PPIA	1	0.00101249	78.816	2	GFGYK(1)GSCFHR	0.53683	6	1.24671	1.23089	0.802054	0.856715	0.842031	1.0216	0.846937	0.977726	1.07829	0.89059	1.03716	1.16929	1.472	1.259	0.744	0.962	0.812	0.874	0.762	0.331367
P62937	131	K	Peptidyl-prolyl cis-trans isomerase A OS=Homo sapiens OX=9606 GN=PPIA PE=1 SV=2	PPIA	1	0.00294251	76.833	2	HVVFGK(1)VK	-0.58418	6	1.13667	1.17851	0.85727	1.09168	0.86802	0.867847	0.846937	0.977726	1.07829	0.89059	1.03716	1.16929	1.342	1.205	0.795	1.226	0.837	0.742	0.839	0.47179
P62937	133	K	Peptidyl-prolyl cis-trans isomerase A OS=Homo sapiens OX=9606 GN=PPIA PE=1 SV=2	PPIA	1	0.00039306	73.502	2	VK(1)EGMNIVEAMER	1.1199	1	1						0.846937	0.977726	1.07829	0.89059	1.03716	1.16929	1.181
P62937	155	K	Peptidyl-prolyl cis-trans isomerase A OS=Homo sapiens OX=9606 GN=PPIA PE=1 SV=2	PPIA	1	9.79846e-05	117.3	2	K(1)ITIADCGQLE	0.44686	6	0.977736	1.35066	0.921161	1.17719	0.752622	0.820629	0.846937	0.977726	1.07829	0.89059	1.03716	1.16929	1.154	1.381	0.854	1.322	0.726	0.702	0.811	0.399662
P62937	125	K	Peptidyl-prolyl cis-trans isomerase A OS=Homo sapiens OX=9606 GN=PPIA PE=1 SV=2	PPIA	1	4.52416e-05	108.4	2	TEWLDGK(1)HVVFGK	1.622	4			0.898739	1.34202	0.887328	0.871917	0.846937	0.977726	1.07829	0.89059	1.03716	1.16929			0.833	1.507	0.856	0.746	1.244
P62937	31	K	Peptidyl-prolyl cis-trans isomerase A OS=Homo sapiens OX=9606 GN=PPIA PE=1 SV=2	PPIA	1	0.00424824	86.205	2	VPK(1)TAENFR	0.010216	4		1.31714	0.75233		0.920814	1.00972	0.846937	0.977726	1.07829	0.89059	1.03716	1.16929		1.347	0.698		0.888	0.864	0.857	0.786548
P62937	28	K	Peptidyl-prolyl cis-trans isomerase A OS=Homo sapiens OX=9606 GN=PPIA PE=1 SV=2	PPIA	1	0.0333309	58.889	2	VSFELFADK(1)VPK	-0.2531	2	0.696606			1.30339			0.846937	0.977726	1.07829	0.89059	1.03716	1.16929	0.823			1.464			1.779
P62995	197	K	Transformer-2 protein homolog beta OS=Homo sapiens OX=9606 GN=TRA2B PE=1 SV=1	TRA2B	1	4.86569e-07	133.9	2	VDFSITK(1)R	0.40713	6	0.97134	1.15015	0.876523	1.22652	0.86426	0.911215	1.09224	0.986304	0.951805	1.04493	0.987002	0.937713	0.889	1.166	0.921	1.174	0.876	0.972	1.015	0.905113
P63104	11	K	14-3-3 protein zeta/delta OS=Homo sapiens OX=9606 GN=YWHAZ PE=1 SV=1	YWHAZ	1	0.000348441	96.311	2	AK(1)LAEQAER	0.042527	6	1.41416	1.11112	0.866305	0.927646	0.865457	0.815312	1.07765	0.967641	1.02592	1.03147	0.92977	0.967548	1.312	1.148	0.844	0.899	0.931	0.843	0.809	0.216386
P63104	85	K	14-3-3 protein zeta/delta OS=Homo sapiens OX=9606 GN=YWHAZ PE=1 SV=1	YWHAZ	1	0.0052231	72.492	2	EK(1)IETELR	2.5592	3			0.865097	1.26781		0.867093	1.07765	0.967641	1.02592	1.03147	0.92977	0.967548			0.843	1.229		0.896	1.26
P63104	9	K	14-3-3 protein zeta/delta OS=Homo sapiens OX=9606 GN=YWHAZ PE=1 SV=1	YWHAZ	1	6.44882e-05	127.93	2	NELVQK(1)AK	-2.4122	6	1.43631	0.902458	0.464028	1.19721			1.07765	0.967641	1.02592	1.03147	0.92977	0.967548	1.333	0.933	0.452	1.161			1.281
P63104	68	K	14-3-3 protein zeta/delta OS=Homo sapiens OX=9606 GN=YWHAZ PE=1 SV=1	YWHAZ	1	1.72986e-10	126.48	2	VVSSIEQK(1)TEGAEK	-0.075842	7	0.962781	1.31847	0.813087	1.59947	0.726243	0.57995	1.07765	0.967641	1.02592	1.03147	0.92977	0.967548	0.893	1.363	0.793	1.551	0.781	0.599	0.961	0.786014
P63104	138	K	14-3-3 protein zeta/delta OS=Homo sapiens OX=9606 GN=YWHAZ PE=1 SV=1	YWHAZ	1	6.39724e-05	87.942	2	YLAEVAAGDDK(1)K	-1.6557	5	1.29764	1.68195	0.271022	0.228078	1.52131		1.07765	0.967641	1.02592	1.03147	0.92977	0.967548	1.204	1.738	0.264	0.221	1.636		0.869	0.787294
P63151	405	K	Serine/threonine-protein phosphatase 2A 55 kDa regulatory subunit B alpha isoform OS=Homo sapiens OX=9606 GN=PPP2R2A PE=1 SV=1	PPP2R2A	1	6.55575e-05	115.05	2	K(1)DEISVDSLDFNK	-0.15279	8		1.08316		1.46205	0.604889	0.849906	1.02673	1.02421	0.991564	1.00948	0.983403	0.964614		1.058		1.448	0.615	0.881	0.928
P63208	155	K	S-phase kinase-associated protein 1 OS=Homo sapiens OX=9606 GN=SKP1 PE=1 SV=2	SKP1	1	8.33268e-05	127.94	2	K(1)ENQWCEEK	0.53084	6	0.697509	1.18673	1.0789	0.90504	1.18367	0.948142	0.860997	1.03867	1.00776	0.908149	1.06161	1.12281	0.81	1.143	1.071	0.997	1.115	0.844	0.978	0.896542
P63220	74	K	40S ribosomal protein S21 OS=Homo sapiens OX=9606 GN=RPS21 PE=1 SV=1	RPS21	1	0.0012747	101.48	2	LAK(1)ADGIVSK	-0.60127	5		1.14082	0.957755	0.922654	1.00532	0.973448	1.0465	1.01189	1.00824	0.996321	1.00668	0.930369		1.127	0.95	0.926	0.999	1.046	0.954	0.605729
P63241	39	K	Eukaryotic translation initiation factor 5A-1 OS=Homo sapiens OX=9606 GN=EIF5A PE=1 SV=2	EIF5A	1	0.020887	70.195	2	GRPCK(1)IVEMSTSK	-0.26075	2		1.06181			0.938189		1.00793	1.02177	1.05466	0.950149	1.02366	0.941829		1.039			0.917		0.883
P63241	47	K	Eukaryotic translation initiation factor 5A-1 OS=Homo sapiens OX=9606 GN=EIF5A PE=1 SV=2	EIF5A	1	0.0177635	44.57	2	IVEMSTSK(1)TGK	-2.4	1				1			1.00793	1.02177	1.05466	0.950149	1.02366	0.941829				1.052
P63241	68	K	Eukaryotic translation initiation factor 5A-1 OS=Homo sapiens OX=9606 GN=EIF5A PE=1 SV=2	EIF5A	1	1.53791e-05	62.494	3	K(1)YEDICPSTHNMDVPNIK	0.17747	2	1.11795	0.882049					1.00793	1.02177	1.05466	0.950149	1.02366	0.941829	1.109	0.863
P63241	121	K	Eukaryotic translation initiation factor 5A-1 OS=Homo sapiens OX=9606 GN=EIF5A PE=1 SV=2	EIF5A	1	0.00497389	71.219	2	LPEGDLGK(1)EIEQK	-0.53958	2	1.24474	0.75526					1.00793	1.02177	1.05466	0.950149	1.02366	0.941829	1.235	0.739
P63241	67	K	Eukaryotic translation initiation factor 5A-1 OS=Homo sapiens OX=9606 GN=EIF5A PE=1 SV=2	EIF5A	1	1.03195e-06	110.88	2	VHLVGIDIFTGK(1)K	0.029086	5	0.94719	0.502632		1.55018			1.00793	1.02177	1.05466	0.950149	1.02366	0.941829	0.94	0.492		1.632			2.279
P63279	18	K	SUMO-conjugating enzyme UBC9 OS=Homo sapiens OX=9606 GN=UBE2I PE=1 SV=1	UBE2I	1	0.000267312	77.157	2	K(1)DHPFGFVAVPTK	-0.78992	5		0.893214	0.893262	1.27053	0.942989		0.921306	1.06785	0.970106	0.963564	1.04196	1.03521		0.836	0.921	1.319	0.905		1.266	0.376659
P63313	15	K	Thymosin beta-10 OS=Homo sapiens OX=9606 GN=TMSB10 PE=1 SV=2	TMSB10	1	0.00048718	70.552	2	ADKPDMGEIASFDK(1)AK	0.060844	3	1.40492		0.703528		0.89155
P67936	11	K	Tropomyosin alpha-4 chain OS=Homo sapiens OX=9606 GN=TPM4 PE=1 SV=3	TPM4	1	0.000160253	127.94	2	AGLNSLEAVK(1)R	0.078512	1				1			1.08521	0.908422	0.947015	0.98541	1.01011	1.06383				1.015
P67936	13	K	Tropomyosin alpha-4 chain OS=Homo sapiens OX=9606 GN=TPM4 PE=1 SV=3	TPM4	1	5.47779e-39	209.7	2	K(1)IQALQQQADEAEDR	-0.66503	6	1.5537	0.916951	0.48701	1.09339	1.08472	0.86424	1.08521	0.908422	0.947015	0.98541	1.01011	1.06383	1.432	1.009	0.514	1.11	1.074	0.812	1.014	0.794081
P67936	169	K	Tropomyosin alpha-4 chain OS=Homo sapiens OX=9606 GN=TPM4 PE=1 SV=3	TPM4	1	6.64414e-11	102.57	2	NVTNNLK(1)SLEAASEK	-0.1966	1	1						1.08521	0.908422	0.947015	0.98541	1.01011	1.06383	0.921
P68104	146	K	Elongation factor 1-alpha 1 OS=Homo sapiens OX=9606 GN=EEF1A1 PE=1 SV=1	EEF1A1	1	1.39123e-06	66.619	3	EHALLAYTLGVK(1)QLIVGVNK	-1.6828	1	1						1.01704	1.00651	1.05079	0.958331	0.954936	1.0124	0.983
P68104	5	K	Elongation factor 1-alpha 1 OS=Homo sapiens OX=9606 GN=EEF1A1 PE=1 SV=1	EEF1A1	1	1.43936e-06	108.34	3	EK(1)THINIVVIGHVDSGK	0.41201	6	0.892996	1.3382	0.90969	0.988697	0.80084	1.06958	1.01704	1.00651	1.05079	0.958331	0.954936	1.0124	0.878	1.33	0.866	1.032	0.839	1.056	0.952	0.84269
P68104	20	K	Elongation factor 1-alpha 1 OS=Homo sapiens OX=9606 GN=EEF1A1 PE=1 SV=1	EEF1A1	1	0.000176548	60.708	3	THINIVVIGHVDSGK(1)STTTGHLIYK	1.2366	1		1					1.01704	1.00651	1.05079	0.958331	0.954936	1.0124		0.994
P68104	179	K	Elongation factor 1-alpha 1 OS=Homo sapiens OX=9606 GN=EEF1A1 PE=1 SV=1	EEF1A1	1	0.0493928	42.835	2	EVSTYIK(1)K	1.8553	1		1					1.01704	1.00651	1.05079	0.958331	0.954936	1.0124		0.994
P68104	44	K	Elongation factor 1-alpha 1 OS=Homo sapiens OX=9606 GN=EEF1A1 PE=1 SV=1	EEF1A1	1	0.000218996	99.855	2	FEK(1)EAAEMGK	0.09145	5		1.15151	0.902743	1.20854	0.836887	0.900317	1.01704	1.00651	1.05079	0.958331	0.954936	1.0124		1.144	0.859	1.261	0.876	0.889	1.007	0.989472
P68104	392	K	Elongation factor 1-alpha 1 OS=Homo sapiens OX=9606 GN=EEF1A1 PE=1 SV=1	EEF1A1	1	0.00128037	90.142	2	KLEDGPK(1)FLK	-0.58972	5	1.42887	0.980426	0.689791	1.15451	0.746401		1.01704	1.00651	1.05079	0.958331	0.954936	1.0124	1.405	0.974	0.656	1.205	0.782		0.982	0.985913
P68104	255	K	Elongation factor 1-alpha 1 OS=Homo sapiens OX=9606 GN=EEF1A1 PE=1 SV=1	EEF1A1	1	0.000299686	96.27	3	LPLQDVYK(1)IGGIGTVPVGR	-0.083214	6	0.717298	1.03584	0.677365	2.64931	0.562547	0.357643	1.01704	1.00651	1.05079	0.958331	0.954936	1.0124	0.705	1.029	0.645	2.765	0.589	0.353	1.558	0.91914
P68104	439	K	Elongation factor 1-alpha 1 OS=Homo sapiens OX=9606 GN=EEF1A1 PE=1 SV=1	EEF1A1	1	6.39608e-07	124.06	2	QTVAVGVIK(1)AVDK	-0.1274	6	1.37372	1.12133	0.862207	1.24403	0.816185	0.582521	1.01704	1.00651	1.05079	0.958331	0.954936	1.0124	1.351	1.114	0.821	1.298	0.855	0.575	0.83	0.469821
P68104	172	K	Elongation factor 1-alpha 1 OS=Homo sapiens OX=9606 GN=EEF1A1 PE=1 SV=1	EEF1A1	1	2.10614e-05	101.45	2	YEEIVK(1)EVSTYIK	-0.053412	4		1.44318	0.54046	1.71834		0.298018	1.01704	1.00651	1.05079	0.958331	0.954936	1.0124		1.434	0.514	1.793		0.294	1.071	0.886713
P68363	336	K	Tubulin alpha-1B chain OS=Homo sapiens OX=9606 GN=TUBA1B PE=1 SV=1	TUBA1B	1	1.72529e-05	101.45	2	DVNAAIATIK(1)TK	0.71668	6	1.03933	1.046	0.95355	1.20439	0.756734
P78318	295	K	Immunoglobulin-binding protein 1 OS=Homo sapiens OX=9606 GN=IGBP1 PE=1 SV=1	IGBP1	1	1.76871e-21	91.1	4	K(1)AAQQQEEQEEKEEEDDEQTLHR	0.11259	3			1.05537		0.900914	1.04372	1.04782	0.946991	1.0738	0.951126	0.966702	1.01357			0.983		0.932	1.03	0.998
P78324	483	K	Tyrosine-protein phosphatase non-receptor type substrate 1 OS=Homo sapiens OX=9606 GN=SIRPA PE=1 SV=2	SIRPA	1	0.0416231	41.025	1	TPK(1)QPAPK	-2.4478	1	1						0.930264	0.936293	1.10186	0.858941	0.993294	1.17935	1.075
P78344	431	K	Eukaryotic translation initiation factor 4 gamma 2 OS=Homo sapiens OX=9606 GN=EIF4G2 PE=1 SV=1	EIF4G2	1	5.55017e-08	75.686	3	FMK(1)SQGLSQLYHNQSQGLLSQLQGQSK	0.22771	4		1.02788	0.542867	2.11096	0.318298		1.08063	0.974165	1.05004	0.936459	0.963724	0.994979		1.055	0.517	2.254	0.33		1.644	0.893578
P78344	31	K	Eukaryotic translation initiation factor 4 gamma 2 OS=Homo sapiens OX=9606 GN=EIF4G2 PE=1 SV=1	EIF4G2	1	2.31732e-05	86.135	3	GAPQHYPK(1)TAGNSEFLGK	1.178	9	1.02605		0.712298	2.05101	0.542273	0.668371	1.08063	0.974165	1.05004	0.936459	0.963724	0.994979	0.949		0.678	2.19	0.563	0.672	1.403	0.79802
P78344	464	K	Eukaryotic translation initiation factor 4 gamma 2 OS=Homo sapiens OX=9606 GN=EIF4G2 PE=1 SV=1	EIF4G2	1	0.0215324	40.861	2	K(1)GQLNADEISLR	0.54923	1	1						1.08063	0.974165	1.05004	0.936459	0.963724	0.994979	0.925
P78344	484	K	Eukaryotic translation initiation factor 4 gamma 2 OS=Homo sapiens OX=9606 GN=EIF4G2 PE=1 SV=1	EIF4G2	1	1.77849e-10	114.93	2	PAQSFLMNK(1)NQVPK	-1.7205	3	1.75089			1.02653	0.222586		1.08063	0.974165	1.05004	0.936459	0.963724	0.994979	1.62			1.096	0.231		0.41
P78344	49	K	Eukaryotic translation initiation factor 4 gamma 2 OS=Homo sapiens OX=9606 GN=EIF4G2 PE=1 SV=1	EIF4G2	1	8.24984e-05	94.791	2	TPGQNAQK(1)WIPAR	-0.046287	4			1.14336	1.28473	0.848861	0.723052	1.08063	0.974165	1.05004	0.936459	0.963724	0.994979			1.089	1.372	0.881	0.727	0.912
P78345	263	K	Ribonuclease P protein subunit p38 OS=Homo sapiens OX=9606 GN=RPP38 PE=1 SV=2	RPP38	1	0.000163998	117.62	2	K(1)LIPNPNK	-0.30017	6	1.32131	0.823235	0.8363	1.3765	0.828024	0.814629	1.18474	0.914697	0.892917	1.2062	0.965833	0.835608	1.115	0.9	0.937	1.141	0.857	0.975	1.007	0.967255
P78346	262	K	Ribonuclease P protein subunit p30 OS=Homo sapiens OX=9606 GN=RPP30 PE=1 SV=1	RPP30	1	7.00949e-06	104.04	2	PSEGDEDCLPASK(1)K	2.2186	4		1.55356		0.978275	0.386033	1.08213	1.18517	1.0556	0.913671	1.10588	0.920503	0.81918		1.472		0.885	0.419	1.321	0.594
P78347	130	K	General transcription factor II-I OS=Homo sapiens OX=9606 GN=GTF2I PE=1 SV=2	GTF2I	1	2.78125e-07	130.71	2	ALGK(1)STVVPVPYEK	-1.5217	6	1.29767	0.859901	0.936447	1.0274	0.890149	0.988437	0.718376	1.06867	1.0742	0.854778	1.08965	1.19433	1.806	0.805	0.872	1.202	0.817	0.828	0.817	0.632628
P78347	670	K	General transcription factor II-I OS=Homo sapiens OX=9606 GN=GTF2I PE=1 SV=2	GTF2I	1	0.0829979	49.325	2	ALQSPK(1)RPR	1.2326	1			1				0.718376	1.06867	1.0742	0.854778	1.08965	1.19433			0.931
P78347	450	K	General transcription factor II-I OS=Homo sapiens OX=9606 GN=GTF2I PE=1 SV=2	GTF2I	1	5.18041e-05	112.7	2	EDLQLDK(1)PASGVK	0.42658	3			0.920164	1.1663		0.91354	0.718376	1.06867	1.0742	0.854778	1.08965	1.19433			0.857	1.364		0.765	1.242
P78347	353	K	General transcription factor II-I OS=Homo sapiens OX=9606 GN=GTF2I PE=1 SV=2	GTF2I	1	1.12311e-21	220.71	2	EFNFEK(1)WNAR	0.26582	6	1.0057	1.16069	0.898395	1.21125	0.88905	0.834906	0.718376	1.06867	1.0742	0.854778	1.08965	1.19433	1.4	1.086	0.836	1.417	0.816	0.699	0.883	0.594176
P78347	664	K	General transcription factor II-I OS=Homo sapiens OX=9606 GN=GTF2I PE=1 SV=2	GTF2I	1	0.000193582	132.39	2	INTK(1)ALQSPK	-0.21081	6	0.927156	1.10133	0.916992	1.16942	0.827002	1.0581	0.718376	1.06867	1.0742	0.854778	1.08965	1.19433	1.291	1.031	0.854	1.368	0.759	0.886	0.949	0.757176
P78347	192	K	General transcription factor II-I OS=Homo sapiens OX=9606 GN=GTF2I PE=1 SV=2	GTF2I	1	0.00404273	129.72	2	RPFLEPK(1)K	0.1366	7	0.779544	1.05474		1.0066	0.998554	1.16056	0.718376	1.06867	1.0742	0.854778	1.08965	1.19433	1.085	0.987		1.178	0.916	0.972	0.986	0.871362
P78347	219	K	General transcription factor II-I OS=Homo sapiens OX=9606 GN=GTF2I PE=1 SV=2	GTF2I	1	5.58476e-11	141.44	2	SILSPGGSCGPIK(1)VK	-0.5383	6	0.792741	0.984851	0.995512	1.09247	0.996548	1.13787	0.718376	1.06867	1.0742	0.854778	1.08965	1.19433	1.104	0.922	0.927	1.278	0.915	0.953	1.065	0.669826
P78347	561	K	General transcription factor II-I OS=Homo sapiens OX=9606 GN=GTF2I PE=1 SV=2	GTF2I	1	2.0537e-07	147.19	2	TNTPVK(1)EDWNVR	0.25475	6	0.449862	1.25755	1.08123	0.678745	1.21649	1.31613	0.718376	1.06867	1.0742	0.854778	1.08965	1.19433	0.626	1.177	1.007	0.794	1.116	1.102	1.072	0.698853
P78371	203	K	T-complex protein 1 subunit beta OS=Homo sapiens OX=9606 GN=CCT2 PE=1 SV=4	CCT2	1	0.00462809	48.701	2	GSGNLEAIHIIK(1)K	0.52631	1		1					0.989636	0.992086	1.08785	0.93229	0.979956	1.01819		1.008
P78371	263	K	T-complex protein 1 subunit beta OS=Homo sapiens OX=9606 GN=CCT2 PE=1 SV=4	CCT2	1	1.83648e-05	115.35	2	VDSTAK(1)VAEIEHAEK	-2.5935	1		1					0.989636	0.992086	1.08785	0.93229	0.979956	1.01819		1.008
P78417	160	K	Glutathione S-transferase omega-1 OS=Homo sapiens OX=9606 GN=GSTO1 PE=1 SV=2	GSTO1	1	0.000164679	125.5	2	LEEVLTNK(1)K	-1.3389	6	1.26589	0.844536	1.36549	0.775416	0.74867		1.20408	0.966379	1.07461	0.889599	0.910922	0.954413	1.051	0.874	1.271	0.872	0.822		0.795	0.220344
P78527	263	K	DNA-dependent protein kinase catalytic subunit OS=Homo sapiens OX=9606 GN=PRKDC PE=1 SV=3	PRKDC	1	0.00396464	61.48	2	AIRPQIDLK(1)R	-0.71387	1				1			1.08493	0.910414	0.983787	1.13147	0.885449	1.00395				0.884
P78527	2694	K	DNA-dependent protein kinase catalytic subunit OS=Homo sapiens OX=9606 GN=PRKDC PE=1 SV=3	PRKDC	1	1.18742e-05	112.7	2	APLK(1)SVGPDFGK	0.76826	6	1.13256	0.96147	0.873116	1.42429	0.779616	0.828939	1.08493	0.910414	0.983787	1.13147	0.885449	1.00395	1.044	1.056	0.888	1.259	0.88	0.826	0.992	0.882414
P78527	2702	K	DNA-dependent protein kinase catalytic subunit OS=Homo sapiens OX=9606 GN=PRKDC PE=1 SV=3	PRKDC	1	0.0117785	51.864	2	SVGPDFGK(1)K	-0.33348	2			0.572525	1.42747			1.08493	0.910414	0.983787	1.13147	0.885449	1.00395			0.582	1.262			2.168
P78527	163	K	DNA-dependent protein kinase catalytic subunit OS=Homo sapiens OX=9606 GN=PRKDC PE=1 SV=3	PRKDC	1	0.00426595	53.878	2	FYGELALK(1)K	2.4172	1				1			1.08493	0.910414	0.983787	1.13147	0.885449	1.00395				0.884
P78527	2908	K	DNA-dependent protein kinase catalytic subunit OS=Homo sapiens OX=9606 GN=PRKDC PE=1 SV=3	PRKDC	1	0.000374216	121.67	2	LLPAELPAK(1)R	-0.59499	6	1.22302	0.886638	0.819447	1.5631	0.697991	0.809809	1.08493	0.910414	0.983787	1.13147	0.885449	1.00395	1.127	0.974	0.833	1.381	0.788	0.807	1.014	0.950301
P78527	1057	K	DNA-dependent protein kinase catalytic subunit OS=Homo sapiens OX=9606 GN=PRKDC PE=1 SV=3	PRKDC	1	0.00718156	62.271	2	SPVNTK(1)SLFK	-0.84136	1				1			1.08493	0.910414	0.983787	1.13147	0.885449	1.00395				0.884
P82979	10	K	SAP domain-containing ribonucleoprotein OS=Homo sapiens OX=9606 GN=SARNP PE=1 SV=3	SARNP	1	8.04027e-05	102.55	2	ATETVELHK(1)LK	1.6685	1						1	0.985153	1.00044	0.967235	1.04697	0.987463	1.01274						0.987
P82979	119	K	SAP domain-containing ribonucleoprotein OS=Homo sapiens OX=9606 GN=SARNP PE=1 SV=3	SARNP	1	0.000209222	92.428	2	FNVPVSLESK(1)K	-0.47835	6	0.716335	0.996781	0.899902	1.32401	0.961764	1.10121	0.985153	1.00044	0.967235	1.04697	0.987463	1.01274	0.727	0.996	0.93	1.265	0.974	1.087	1.254	0.133463
P82979	149	K	SAP domain-containing ribonucleoprotein OS=Homo sapiens OX=9606 GN=SARNP PE=1 SV=3	SARNP	0.999969	0.0280364	59.997	2	GLSSDNKPMVNLDK(1)LK	-0.62988	1				1			0.985153	1.00044	0.967235	1.04697	0.987463	1.01274				0.955
P82979	89	K	SAP domain-containing ribonucleoprotein OS=Homo sapiens OX=9606 GN=SARNP PE=1 SV=3	SARNP	0.798337	0.00281891	79.889	3	K(0.798)VVK(0.202)ITSEIPQTER	1.4324	2				1.26178	0.738216		0.985153	1.00044	0.967235	1.04697	0.987463	1.01274				1.205	0.748
P82979	92	K	SAP domain-containing ribonucleoprotein OS=Homo sapiens OX=9606 GN=SARNP PE=1 SV=3	SARNP	1	1.20785e-07	128.57	2	VVK(1)ITSEIPQTER	-0.24337	9	0.995495	0.945576	0.853665	1.31418	0.946586	0.944495	0.985153	1.00044	0.967235	1.04697	0.987463	1.01274	1.01	0.945	0.883	1.255	0.959	0.933	1.109	0.402388
P83111	252	K	Serine beta-lactamase-like protein LACTB, mitochondrial OS=Homo sapiens OX=9606 GN=LACTB PE=1 SV=2	LACTB	1	0.000580714	92.707	2	ENVAFEQEK(1)EGK	0.61242	1					1		1.06267	1.03985	0.897573	0.975985	1.06985	0.954071					0.935
P83731	147	K	60S ribosomal protein L24 OS=Homo sapiens OX=9606 GN=RPL24 PE=1 SV=1	RPL24	1	0.000155743	146.88	3	IVKPVK(1)VSAPR	-0.2469	12	0.918778	0.847813	0.977913	1.24761	0.975824	1.03206	0.974074	0.785997	1.05107	1.16207	0.908562	1.11822	0.943	1.079	0.93	1.074	1.074	0.923	1.04	0.600809
P83731	131	K	60S ribosomal protein L24 OS=Homo sapiens OX=9606 GN=RPL24 PE=1 SV=1	RPL24	1	0.00123707	79.311	2	TAMAAAK(1)APTK	-1.4388	5	0.974573	0.635604		1.43408	1.01125	0.944486	0.974074	0.785997	1.05107	1.16207	0.908562	1.11822	1.001	0.809		1.234	1.113	0.845	1.176	0.419269
P83916	9	K	Chromobox protein homolog 1 OS=Homo sapiens OX=9606 GN=CBX1 PE=1 SV=1	CBX1	1	7.78131e-21	182.52	2	K(1)VEEVLEEEEEEYVVEK	-1.583	9	1.27651	1.28368	1.4275	0.343612	0.848009	0.82069	0.905326	1.05395	1.08324	0.884212	1.04782	1.02546	1.41	1.218	1.318	0.389	0.809	0.8	0.506	0.0408547
P84098	186	K	60S ribosomal protein L19 OS=Homo sapiens OX=9606 GN=RPL19 PE=1 SV=1	RPL19	0.999997	0.00102733	92.445	2	KEEIIK(1)TLSK	0.25604	6	0.94591	1.0016	0.724655	1.19075	1.15178	0.985305	1.05374	0.809912	1.02427	1.12771	0.923908	1.06046	0.898	1.237	0.707	1.056	1.247	0.929	1.137	0.464981
P84098	153	K	60S ribosomal protein L19 OS=Homo sapiens OX=9606 GN=RPL19 PE=1 SV=1	RPL19	1	0.000179982	105.36	2	K(1)LLADQAEAR	1.0099	6	1.13534	0.970446	0.795297	1.26258	0.955112	0.881221	1.05374	0.809912	1.02427	1.12771	0.923908	1.06046	1.077	1.198	0.776	1.12	1.034	0.831	0.978	0.93753
P84157	147	K	Matrix-remodeling-associated protein 7 OS=Homo sapiens OX=9606 GN=MXRA7 PE=1 SV=1	MXRA7	1	0.0306862	64.547	2	YSPGK(1)LR	0.07893	3	1.0578	0.786431		1.15577			1.13527	0.858715	0.954909	1.13862	0.878836	1.03365	0.932	0.916		1.015			1.098
P84243	80	K	Histone H3.3 OS=Homo sapiens OX=9606 GN=H3-3A PE=1 SV=2	H3-3A	1	0.000128552	127.93	2	EIAQDFK(1)TDLR	0.69441	7	1.82622	1.00287	0.565411	1.08044	0.820017	0.705042
P84243	28	K	Histone H3.3 OS=Homo sapiens OX=9606 GN=H3-3A PE=1 SV=2	H3-3A	1	0.00377896	74.424	2	K(1)SAPSTGGVK	0.66933	1				1
P84243	24	K	Histone H3.3 OS=Homo sapiens OX=9606 GN=H3-3A PE=1 SV=2	H3-3A	1	0.00026776	147.16	2	QLATK(1)AAR	0.13926	6	0.354676	0.601947	0.960021	2.22389	1.08171	0.777751
P84243	123	K	Histone H3.3 OS=Homo sapiens OX=9606 GN=H3-3A PE=1 SV=2	H3-3A	1	0.00539735	54.584	2	VTIMPK(1)DIQLAR	0.33297	4	1.3397		0.718423	1.0832		0.858672
P84243	57	K	Histone H3.3 OS=Homo sapiens OX=9606 GN=H3-3A PE=1 SV=2	H3-3A	1	0.000991812	98.009	2	YQK(1)STELLIR	-0.37801	6	1.14184	1.01468	0.867759	1.11866	0.889689	0.967379
P85037	347	K	Forkhead box protein K1 OS=Homo sapiens OX=9606 GN=FOXK1 PE=1 SV=1	FOXK1	1	0.00123707	83.775	2	TADK(1)GWQNSIR	3.3675	4	0.846351		0.755709	1.27732		1.12062	1.05405	0.989269	1.03085	1.07137	0.900452	0.954005	0.803		0.733	1.192		1.175	1.541	0.0111546
Q00013	323	K	55 kDa erythrocyte membrane protein OS=Homo sapiens OX=9606 GN=MPP1 PE=1 SV=2	MPP1	0.999815	5.65753e-06	68.42	3	K(1)SEEDGKEYHFISTEEMTR	0.81375	2	0.985514		1.01449				0.74152	1.18505	1.15481	0.619489	1.07928	1.21986	1.329		0.878
Q00013	247	K	55 kDa erythrocyte membrane protein OS=Homo sapiens OX=9606 GN=MPP1 PE=1 SV=2	MPP1	1	0.000316475	58.045	2	VASMAQSAPSEAPSCSPFGK(1)K	1.2103	3			1.23217	1.24166	0.526166		0.74152	1.18505	1.15481	0.619489	1.07928	1.21986			1.067	2.004	0.488		1.168
Q00341	1071	K	Vigilin OS=Homo sapiens OX=9606 GN=HDLBP PE=1 SV=2	HDLBP	1	0.0892075	56.378	2	K(1)GAVITQIR	-1.4905	1				1			0.922593	0.977087	1.06271	0.881074	1.04036	1.11617				1.135
Q00341	991	K	Vigilin OS=Homo sapiens OX=9606 GN=HDLBP PE=1 SV=2	HDLBP	1	0.0010649	74.424	2	YVIGQK(1)GSGIR	-0.56233	2			0.999775		1.00023		0.922593	0.977087	1.06271	0.881074	1.04036	1.11617			0.941		0.961		1.021
Q00688	86	K	Peptidyl-prolyl cis-trans isomerase FKBP3 OS=Homo sapiens OX=9606 GN=FKBP3 PE=1 SV=1	FKBP3	1	0.00532166	90.308	2	VSEQVK(1)NVK	-0.77179	1	1						1.02102	0.902171	0.974077	1.17102	0.926584	1.00513	0.979
Q00765	176	K	Receptor expression-enhancing protein 5 OS=Homo sapiens OX=9606 GN=REEP5 PE=1 SV=3	REEP5	1	0.0431651	41.796	2	K(1)ATVNLLGEEK	-2.9086	1				1			1.11799	0.94563	1.00792	0.938827	0.948281	1.04136				1.065
Q00839	609	K	Heterogeneous nuclear ribonucleoprotein U OS=Homo sapiens OX=9606 GN=HNRNPU PE=1 SV=6	HNRNPU	1	0.00047784	85.622	2	AVVVCPK(1)DEDYK	0.10835	6	0.900021	1.52797	1.04881	0.849022	0.700141	0.97404	0.980564	0.956855	1.03539	1.00097	0.976749	1.04947	0.918	1.597	1.013	0.848	0.717	0.928	0.707	0.158798
Q00839	635	K	Heterogeneous nuclear ribonucleoprotein U OS=Homo sapiens OX=9606 GN=HNRNPU PE=1 SV=6	HNRNPU	1	0.00617823	57.888	2	DLPEHAVLK(1)MK	2.6906	5	1.5229		0.845409	1.22617	0.773025	0.632491	0.980564	0.956855	1.03539	1.00097	0.976749	1.04947	1.553		0.817	1.225	0.791	0.603	0.737	0.466331
Q00839	186	K	Heterogeneous nuclear ribonucleoprotein U OS=Homo sapiens OX=9606 GN=HNRNPU PE=1 SV=6	HNRNPU	1	4.26644e-08	93.026	3	EAAGK(1)SSGPTSLFAVTVAPPGAR	0.14233	7	1.57057	1.51933	0.51289	1.19492	0.775482	0.426816	0.980564	0.956855	1.03539	1.00097	0.976749	1.04947	1.602	1.588	0.495	1.194	0.794	0.407	0.65	0.474915
Q00839	31	K	Heterogeneous nuclear ribonucleoprotein U OS=Homo sapiens OX=9606 GN=HNRNPU PE=1 SV=6	HNRNPU	1	0.00469584	65.404	2	GLK(1)AELMER	-0.9679	2	1.02893	0.971068					0.980564	0.956855	1.03539	1.00097	0.976749	1.04947	1.049	1.015
Q00839	352	K	Heterogeneous nuclear ribonucleoprotein U OS=Homo sapiens OX=9606 GN=HNRNPU PE=1 SV=6	HNRNPU	1	1.51413e-07	133.49	3	HLYTK(1)DIDIHEVR	0.61798	2				1.32084		0.679161	0.980564	0.956855	1.03539	1.00097	0.976749	1.04947				1.32		0.647
Q00839	12	K	Heterogeneous nuclear ribonucleoprotein U OS=Homo sapiens OX=9606 GN=HNRNPU PE=1 SV=6	HNRNPU	1	8.73529e-05	136.94	2	LK(1)VSELK	0.73583	12	1.01869	1.00412	0.940425	1.15966	0.930916	0.946189	0.980564	0.956855	1.03539	1.00097	0.976749	1.04947	1.039	1.049	0.908	1.159	0.953	0.902	1.006	0.981252
Q00839	21	K	Heterogeneous nuclear ribonucleoprotein U OS=Homo sapiens OX=9606 GN=HNRNPU PE=1 SV=6	HNRNPU	1	0.000860452	96.957	2	VSELKEELK(1)K	0.67574	6	1.38992	1.13916	0.845877	1.11741	0.620393	0.887241	0.980564	0.956855	1.03539	1.00097	0.976749	1.04947	1.417	1.191	0.817	1.116	0.635	0.845	0.758	0.293387
Q00839	9	K	Heterogeneous nuclear ribonucleoprotein U OS=Homo sapiens OX=9606 GN=HNRNPU PE=1 SV=6	HNRNPU	1	0.0280112	53.878	2	SSSPVNVK(1)K	-0.0686	4		1.296	0.964747		0.843682	0.895567	0.980564	0.956855	1.03539	1.00097	0.976749	1.04947		1.354	0.932		0.864	0.853	0.751	0.28674
Q01081	15	K	Splicing factor U2AF 35 kDa subunit OS=Homo sapiens OX=9606 GN=U2AF1 PE=1 SV=3	U2AF1	1	0.024242	63.397	2	DK(1)VNCSFYFK	1.1635	2		1.1312		0.8688			1.0359	0.958655	0.989381	1.07392	0.96937	0.972776		1.18		0.809			0.686
Q01082	2177	K	Spectrin beta chain, non-erythrocytic 1 OS=Homo sapiens OX=9606 GN=SPTBN1 PE=1 SV=2	SPTBN1	1	1.04767e-05	97.084	2	AK(1)TALPAQSAATLPAR	-1.8373	2			0.632045	1.36796			1.20481	0.907684	1.04723	1.05296	0.864705	0.922607			0.604	1.299			2.151
Q01082	2362	K	Spectrin beta chain, non-erythrocytic 1 OS=Homo sapiens OX=9606 GN=SPTBN1 PE=1 SV=2	SPTBN1	1	0.0273092	61.494	2	FSLFGK(1)K	0.94581	6	1.58116	1.16079	0.923615	1.00936	0.739203	0.585871	1.20481	0.907684	1.04723	1.05296	0.864705	0.922607	1.312	1.279	0.882	0.959	0.855	0.635	0.705	0.121526
Q01082	1981	K	Spectrin beta chain, non-erythrocytic 1 OS=Homo sapiens OX=9606 GN=SPTBN1 PE=1 SV=2	SPTBN1	1	0.00110221	67.881	2	K(1)HYASEEIK	-1.2245	1	1						1.20481	0.907684	1.04723	1.05296	0.864705	0.922607	0.83
Q01105	15	K	Protein SET OS=Homo sapiens OX=9606 GN=SET PE=1 SV=3	SET	1	6.33678e-31	169.6	3	K(1)PRPPPALGPEETSASAGLPK	-0.84336	17	0.591076	0.868678	1.0093	1.85621	0.811131	0.863611	1.079	0.975659	1.0143	1.03528	0.929045	0.966712	0.548	0.89	0.995	1.793	0.873	0.893	1.463	0.303405
Q01105	35	K	Protein SET OS=Homo sapiens OX=9606 GN=SET PE=1 SV=3	SET	1	9.98329e-12	76.23	3	KPRPPPALGPEETSASAGLPK(1)K	0.90105	2	1						1.079	0.975659	1.0143	1.03528	0.929045	0.966712	0.927
Q01105	13	K	Protein SET OS=Homo sapiens OX=9606 GN=SET PE=1 SV=3	SET	1	0.000360841	110.22	2	QSPLPPQK(1)K	-0.086707	14	1.35107	1.02235	0.85589	1.25669		0.513992	1.079	0.975659	1.0143	1.03528	0.929045	0.966712	1.252	1.048	0.844	1.214		0.532	0.833	0.512418
Q01167	223	K	Forkhead box protein K2 OS=Homo sapiens OX=9606 GN=FOXK2 PE=1 SV=3	FOXK2	1	0.00638111	74.269	2	GAGSSGYK(1)VGR	0.89589	1				1
Q01518	317	K	Adenylyl cyclase-associated protein 1 OS=Homo sapiens OX=9606 GN=CAP1 PE=1 SV=5	CAP1	1	0.00383543	63.212	2	K(1)EPAVLELEGK	-0.13834	4	0.973009		0.827447	1.13204	1.06751		1.00686	0.967928	1.03001	0.950131	0.975503	1.06957	0.966		0.803	1.191	1.094		1.292	0.125503
Q01518	287	K	Adenylyl cyclase-associated protein 1 OS=Homo sapiens OX=9606 GN=CAP1 PE=1 SV=5	CAP1	1	1.10371e-11	199.4	2	NPALK(1)AQSGPVR	0.22691	6	1.20541	1.02984	0.86486	1.02562	0.91526	0.959004	1.00686	0.967928	1.03001	0.950131	0.975503	1.06957	1.197	1.064	0.84	1.079	0.938	0.897	0.94	0.667112
Q01658	95	K	Protein Dr1 OS=Homo sapiens OX=9606 GN=DR1 PE=1 SV=1	DR1	1	1.08271e-05	123.42	2	EVLQECK(1)TVALK	-0.29329	4		0.903498		1.57302	0.759172	0.764311	1.13218	0.860931	1.00097	0.987138	0.960083	1.0587		1.049		1.594	0.791	0.722	0.987
Q01780	710	K	Exosome component 10 OS=Homo sapiens OX=9606 GN=EXOSC10 PE=1 SV=2	EXOSC10	1	0.000537021	62.398	2	APVSQAAK(1)FDPSTK	-19.181	1			1				1.03207	0.99405	0.995211	0.990276	1.00073	0.987664			1.005
Q01813	688	K	ATP-dependent 6-phosphofructokinase, platelet type OS=Homo sapiens OX=9606 GN=PFKP PE=1 SV=2	PFKP	1	2.16499e-05	175.51	2	NFGTK(1)ISAR	1.1664	11	1.01377	1.05601	0.907292	1.27135	0.89124	0.860343	0.983581	0.937162	0.968351	1.02675	1.02913	1.05503	1.031	1.127	0.937	1.238	0.866	0.815	0.943	0.630275
Q01831	50	K	DNA repair protein complementing XP-C cells OS=Homo sapiens OX=9606 GN=XPC PE=1 SV=4	XPC	1	0.000193542	90.761	2	SLLSK(1)VSQGK	1.0423	6	1.19104	0.959929	0.847466	1.35095	0.869615	0.780992
Q02224	986	K	Centromere-associated protein E OS=Homo sapiens OX=9606 GN=CENPE PE=1 SV=2	CENPE	1	0.012667	51.864	2	SK(1)ISEEVSR	0.20172	1				1
Q02241	956	K	Kinesin-like protein KIF23 OS=Homo sapiens OX=9606 GN=KIF23 PE=1 SV=3	KIF23	1	1.80625e-09	140.57	3	AGSQLGPGYQHHAQPK(1)R	0.92014	5		1.40351	1.30195	0.357302	1.0623	0.874932	0.226623	1.41582	1.6181	0.077903	1.36244	1.29912		0.991	0.805	4.587	0.78	0.673	2.242	0.646773
Q02241	877	K	Kinesin-like protein KIF23 OS=Homo sapiens OX=9606 GN=KIF23 PE=1 SV=3	KIF23	1	0.0496049	42.075	2	LIK(1)GDIYK	-1.2534	1		1					0.226623	1.41582	1.6181	0.077903	1.36244	1.29912		0.706
Q02790	409	K	Peptidyl-prolyl cis-trans isomerase FKBP4 OS=Homo sapiens OX=9606 GN=FKBP4 PE=1 SV=3	FKBP4	1	0.00138167	72.038	2	K(1)LYANMFER	-0.46518	1						1	1.03268	0.894817	1.02287	0.994805	1.0036	1.05122						0.951
Q02878	210	K	60S ribosomal protein L6 OS=Homo sapiens OX=9606 GN=RPL6 PE=1 SV=3	RPL6	1	0.000235126	67.548	2	IPK(1)HLTDAYFK	-0.26466	2	1.09672			0.90328			1.20685	0.640678	0.950889	1.26491	0.874276	1.0624	0.909			0.714			0.785
Q02880	1214	K	DNA topoisomerase 2-beta OS=Homo sapiens OX=9606 GN=TOP2B PE=1 SV=3	TOP2B	1	0.00108065	67.548	2	EDVLAGMSGK(1)AIK	0.30073	6	1.27582	0.788569	0.643851	1.6839	0.642309	0.96556	0.987873	0.834014	0.995135	1.15903	0.920092	1.10385	1.291	0.946	0.647	1.453	0.698	0.875	1.049	0.901914
Q02880	1227	K	DNA topoisomerase 2-beta OS=Homo sapiens OX=9606 GN=TOP2B PE=1 SV=3	TOP2B	1	3.36904e-07	97.594	2	K(1)LQLEETMPSPYGR	-2.6892	2	1.1574			0.842596			0.987873	0.834014	0.995135	1.15903	0.920092	1.10385	1.172			0.727			0.62
Q02880	1490	K	DNA topoisomerase 2-beta OS=Homo sapiens OX=9606 GN=TOP2B PE=1 SV=3	TOP2B	1	0.0235775	72.042	2	VPSK(1)TVAAK	-0.51161	4	1.02839			1.51144	0.662986	0.797182	0.987873	0.834014	0.995135	1.15903	0.920092	1.10385	1.041			1.304	0.721	0.722	0.88
Q03164	3219	K	Histone-lysine N-methyltransferase 2A OS=Homo sapiens OX=9606 GN=KMT2A PE=1 SV=5	KMT2A	1	8.70409e-06	84.309	2	TDLSTTVATPSSGLK(1)K	-2.2234	2		1.1044		0.895597			0.816221	0.907061	0.850186	0.802948	1.15876	1.46483		1.218		1.115			0.915
Q03169	54	K	Tumor necrosis factor alpha-induced protein 2 OS=Homo sapiens OX=9606 GN=TNFAIP2 PE=1 SV=2	TNFAIP2	1	2.5347e-18	167.01	2	K(1)GQPSSAEPEDAAGSR	-0.30915	6	1.05324	0.891119	1.01299	1.38395	0.807761	0.850937	1.04938	0.851358	0.96236	1.16044	1.00943	0.967032	1.004	1.047	1.053	1.193	0.8	0.88	0.926	0.490766
Q03701	787	K	CCAAT/enhancer-binding protein zeta OS=Homo sapiens OX=9606 GN=CEBPZ PE=1 SV=3	CEBPZ	1	0.00864073	81.32	2	HFIK(1)DIR	1.0306	4		1.06284		1.28294	0.882676	0.771543	1.07504	0.9488	1.04592	0.985997	0.989046	0.955199		1.12		1.301	0.892	0.808	0.893
Q04323	154	K	UBX domain-containing protein 1 OS=Homo sapiens OX=9606 GN=UBXN1 PE=1 SV=2	UBXN1	1	0.000952559	72.038	2	EK(1)AEELAAR	-0.059529	4	0.963003		0.729725	1.72849		0.578779	1.21345	0.904065	0.957406	1.1385	0.871849	0.914726	0.794		0.762	1.518		0.633	1.382	0.650065
Q04323	178	K	UBX domain-containing protein 1 OS=Homo sapiens OX=9606 GN=UBXN1 PE=1 SV=2	UBXN1	1	1.99921e-08	93.812	3	K(1)YGGSVGSQPPPVAPEPGPVPSSPSQEPPTK	0.98092	1	1						1.21345	0.904065	0.957406	1.1385	0.871849	0.914726	0.824
Q04637	950	K	Eukaryotic translation initiation factor 4 gamma 1 OS=Homo sapiens OX=9606 GN=EIF4G1 PE=1 SV=4	EIF4G1	0.999999	1.46874e-06	178.94	2	DLDFEK(1)AKPR	0.033423	6	1.11014	0.692172	0.651778	1.68152	0.968478	0.895909	0.919777	1.05974	1.0506	0.894142	1.06402	1.01172	1.207	0.653	0.62	1.881	0.91	0.886	1.483	0.311913
Q04637	1019	K	Eukaryotic translation initiation factor 4 gamma 1 OS=Homo sapiens OX=9606 GN=EIF4G1 PE=1 SV=4	EIF4G1	1	0.00440819	69.716	2	EHIK(1)VQQLMAK	-0.53436	1					1		0.919777	1.05974	1.0506	0.894142	1.06402	1.01172					0.94
Q04637	1026	K	Eukaryotic translation initiation factor 4 gamma 1 OS=Homo sapiens OX=9606 GN=EIF4G1 PE=1 SV=4	EIF4G1	1	9.315e-05	132.39	2	VQQLMAK(1)GSDK	0.59279	6	0.967493	1.14964	0.895157	1.27258	0.893876	0.821256	0.919777	1.05974	1.0506	0.894142	1.06402	1.01172	1.052	1.085	0.852	1.423	0.84	0.812	1.029	0.99753
Q04637	1206	K	Eukaryotic translation initiation factor 4 gamma 1 OS=Homo sapiens OX=9606 GN=EIF4G1 PE=1 SV=4	EIF4G1	1	4.40255e-05	118.91	2	K(1)AASLTEDRDR	0.38403	9	0.994977	0.993644	0.970097	1.40268	0.894865	0.743734	0.919777	1.05974	1.0506	0.894142	1.06402	1.01172	1.082	0.938	0.923	1.569	0.841	0.735	1.069	0.963707
Q04637	524	K	Eukaryotic translation initiation factor 4 gamma 1 OS=Homo sapiens OX=9606 GN=EIF4G1 PE=1 SV=4	EIF4G1	1	0.0454921	48.701	2	K(1)EAVGDLLDAFK	0.25682	1				1			0.919777	1.05974	1.0506	0.894142	1.06402	1.01172				1.118
Q04637	714	K	Eukaryotic translation initiation factor 4 gamma 1 OS=Homo sapiens OX=9606 GN=EIF4G1 PE=1 SV=4	EIF4G1	1	4.84585e-05	99.276	2	K(1)IIATVLMTEDIK	-3.2132	6	1.14158	1.47604	0.371543	1.68726	0.806689	0.516895	0.919777	1.05974	1.0506	0.894142	1.06402	1.01172	1.241	1.393	0.354	1.887	0.758	0.511	1.056	0.924243
Q04637	1095	K	Eukaryotic translation initiation factor 4 gamma 1 OS=Homo sapiens OX=9606 GN=EIF4G1 PE=1 SV=4	EIF4G1	1	6.53891e-11	145.08	2	LSWGK(1)GSSGGSGAK	1.0229	6	1.04487	1.03365	0.846208	1.23666	0.964248	0.874369	0.919777	1.05974	1.0506	0.894142	1.06402	1.01172	1.136	0.975	0.805	1.383	0.906	0.864	1.081	0.737033
Q04637	1071	K	Eukaryotic translation initiation factor 4 gamma 1 OS=Homo sapiens OX=9606 GN=EIF4G1 PE=1 SV=4	EIF4G1	1	1.77676e-62	241.99	3	LTK(1)ITKPGSIDSNNQLFAPGGR	0.63662	7	1.20855	1.06763	0.831967	1.24598	1.03787	0.608002	0.919777	1.05974	1.0506	0.894142	1.06402	1.01172	1.314	1.007	0.792	1.393	0.975	0.601	0.954	0.783967
Q04637	1188	K	Eukaryotic translation initiation factor 4 gamma 1 OS=Homo sapiens OX=9606 GN=EIF4G1 PE=1 SV=4	EIF4G1	1	0.000742328	102.55	2	SFSK(1)EVEER	0.74578	5		1.29877	1.0245	0.731443	0.97119	0.974095	0.919777	1.05974	1.0506	0.894142	1.06402	1.01172		1.226	0.975	0.818	0.913	0.963	0.816	0.15566
Q04637	1007	K	Eukaryotic translation initiation factor 4 gamma 1 OS=Homo sapiens OX=9606 GN=EIF4G1 PE=1 SV=4	EIF4G1	1	1.84213e-05	67.887	3	TIDQIHK(1)EAEMEEHR	2.9166	1					1		0.919777	1.05974	1.0506	0.894142	1.06402	1.01172					0.94
Q04724	316	K	Transducin-like enhancer protein 1 OS=Homo sapiens OX=9606 GN=TLE1 PE=1 SV=2	TLE1	1	0.000165508	89.382	2	ASTPVLK(1)SSTPTPR	0.092319	6	0.809782	0.952976	0.929546			1.3077
Q04726	309	K	Transducin-like enhancer protein 3 OS=Homo sapiens OX=9606 GN=TLE3 PE=1 SV=2	TLE3	1	4.63587e-05	112.95	2	DLGHNDK(1)SSTPGLK	1.1248	6	0.720395	1.26873	0.600156	1.21326	1.16032	1.03713	0.764239	0.858427	0.983486	1.02638	1.0848	1.28267	0.943	1.478	0.61	1.182	1.07	0.809	1.01	0.836038
Q04726	316	K	Transducin-like enhancer protein 3 OS=Homo sapiens OX=9606 GN=TLE3 PE=1 SV=2	TLE3	1	2.11553e-10	143.22	2	SSTPGLK(1)SNTPTPR	-0.47579	6	0.923303	1.04113	0.905653	1.1021	1.01033	1.01749	0.764239	0.858427	0.983486	1.02638	1.0848	1.28267	1.208	1.213	0.921	1.074	0.931	0.793	0.837	0.233437
Q04726	225	K	Transducin-like enhancer protein 3 OS=Homo sapiens OX=9606 GN=TLE3 PE=1 SV=2	TLE3	1	0.0239592	46.033	2	GSADYSMEAK(1)K	3.8339	1				1			0.764239	0.858427	0.983486	1.02638	1.0848	1.28267				0.974
Q05209	465	K	Tyrosine-protein phosphatase non-receptor type 12 OS=Homo sapiens OX=9606 GN=PTPN12 PE=1 SV=3	PTPN12	1	0.00491171	68.49	2	IK(1)SASPCIADK	-0.33931	6	1.08568	0.982506	0.660531	1.02844	1.00024	1.2426	1.02193	0.985959	0.983158	1.00999	0.990492	1.00848	1.062	0.996	0.672	1.018	1.01	1.232	1.194	0.287506
Q05682	655	K	Caldesmon OS=Homo sapiens OX=9606 GN=CALD1 PE=1 SV=3	CALD1	1	0.000940739	87.895	2	AEFLNK(1)SVQK	-0.033303	6	1.09873	1.01487	0.958467	0.835617	0.960476	1.13184	1.19692	0.926109	1.05936	0.881901	0.901113	1.0346	0.918	1.096	0.905	0.948	1.066	1.094	1.065	0.441141
Q05682	781	K	Caldesmon OS=Homo sapiens OX=9606 GN=CALD1 PE=1 SV=3	CALD1	1	0.0350454	54.584	2	NLWEK(1)QSVDK	-0.65635	1						1	1.19692	0.926109	1.05936	0.881901	0.901113	1.0346						0.967
Q05682	786	K	Caldesmon OS=Homo sapiens OX=9606 GN=CALD1 PE=1 SV=3	CALD1	1	0.0170557	65.933	2	QSVDK(1)VTSPTK	3.4033	1		1					1.19692	0.926109	1.05936	0.881901	0.901113	1.0346		1.08
Q05682	775	K	Caldesmon OS=Homo sapiens OX=9606 GN=CALD1 PE=1 SV=3	CALD1	1	5.53517e-05	96.946	3	PSDLRPGDVSSK(1)R	-0.0011779	4	0.915825	0.996457	1.09393			0.993786	1.19692	0.926109	1.05936	0.881901	0.901113	1.0346	0.765	1.076	1.033			0.961	1.003
Q05682	664	K	Caldesmon OS=Homo sapiens OX=9606 GN=CALD1 PE=1 SV=3	CALD1	1	3.17246e-14	164.56	2	SSGVK(1)STHQAAIVSK	-1.063	5	1.7637	0.96368		0.555175	0.829539	0.887903	1.19692	0.926109	1.05936	0.881901	0.901113	1.0346	1.474	1.041		0.63	0.921	0.858	0.639	0.110107
Q05682	674	K	Caldesmon OS=Homo sapiens OX=9606 GN=CALD1 PE=1 SV=3	CALD1	1	2.53523e-11	139.61	2	STHQAAIVSK(1)IDSR	0.26686	8	1.34902	0.935958	0.886163	0.880633	0.878276	1.06995	1.19692	0.926109	1.05936	0.881901	0.901113	1.0346	1.127	1.011	0.837	0.999	0.975	1.034	1.011	0.847365
Q06830	197	K	Peroxiredoxin-1 OS=Homo sapiens OX=9606 GN=PRDX1 PE=1 SV=1	PRDX1	1	0.0329569	80.294	2	EYFSK(1)QK	0.95407	5		0.950614	0.83526	1.09355	1.08574	1.03483	0.847876	1.01225	1.00912	0.947246	1.04856	1.13495		0.939	0.828	1.154	1.035	0.912	1.17	0.218733
Q06830	190	K	Peroxiredoxin-1 OS=Homo sapiens OX=9606 GN=PRDX1 PE=1 SV=1	PRDX1	0.999813	6.94485e-16	143.56	4	HGEVCPAGWKPGSDTIKPDVQK(1)SK	-0.33103	5	1.04358		0.90303	1.09678	0.962239	0.994363	0.847876	1.01225	1.00912	0.947246	1.04856	1.13495	1.231		0.895	1.158	0.918	0.876	0.926	0.687548
Q07157	9	K	Tight junction protein ZO-1 OS=Homo sapiens OX=9606 GN=TJP1 PE=1 SV=3	TJP1	1	3.90716e-16	98.942	3	AAAAK(1)STAMEETAIWEQHTVTLHR	0.43646	2	1.33531			0.664691			1.1491	0.906218	1.09942	0.971639	0.898919	0.974704	1.162			0.684			0.589
Q07157	153	K	Tight junction protein ZO-1 OS=Homo sapiens OX=9606 GN=TJP1 PE=1 SV=3	TJP1	1	0.007109	92.677	2	SEK(1)IWPR	0.51391	5		1.01169	0.938623	1.06145	0.999187	0.989052	1.1491	0.906218	1.09942	0.971639	0.898919	0.974704		1.116	0.854	1.092	1.112	1.015	1.089	0.441803
Q07666	432	K	KH domain-containing, RNA-binding, signal transduction-associated protein 1 OS=Homo sapiens OX=9606 GN=KHDRBS1 PE=1 SV=1	KHDRBS1	1	0.00613999	92.319	2	PVK(1)GAYR	0.46835	7			0.671182	1.53223	0.822883	0.973704	1.00605	0.986109	0.963895	1.01465	0.97711	1.05218			0.696	1.51	0.842	0.925	1.569
Q07666	424	K	KH domain-containing, RNA-binding, signal transduction-associated protein 1 OS=Homo sapiens OX=9606 GN=KHDRBS1 PE=1 SV=1	KHDRBS1	1	0.000478833	94.806	2	PSLK(1)APPARPVK	0.6261	8	1.15955	1.01532	0.841841	1.29446	0.771607	0.917232	1.00605	0.986109	0.963895	1.01465	0.97711	1.05218	1.153	1.03	0.873	1.276	0.79	0.872	0.961	0.758335
Q08170	95	K	Serine/arginine-rich splicing factor 4 OS=Homo sapiens OX=9606 GN=SRSF4 PE=1 SV=2	SRSF4	1	0.0507766	43.734	2	DK(1)YGPPTR	0.21668	1						1	1.04662	0.91123	0.876241	1.19319	0.939133	1.03359						0.968
Q08211	193	K	ATP-dependent RNA helicase A OS=Homo sapiens OX=9606 GN=DHX9 PE=1 SV=4	DHX9	1	0.00321253	53.878	2	EK(1)IQGEYK	-1.3398	2				1.27004	0.729962		0.938906	1.01344	1.01723	0.98535	1.01002	1.03506				1.289	0.723
Q08211	146	K	ATP-dependent RNA helicase A OS=Homo sapiens OX=9606 GN=DHX9 PE=1 SV=4	DHX9	1	5.8996e-05	154.35	2	GANLK(1)DYYSR	0.4264	6	1.02744	0.893243	0.801986	1.49133	0.84809	0.937921	0.938906	1.01344	1.01723	0.98535	1.01002	1.03506	1.094	0.881	0.788	1.513	0.84	0.906	1.18	0.542128
Q08211	14	K	ATP-dependent RNA helicase A OS=Homo sapiens OX=9606 GN=DHX9 PE=1 SV=4	DHX9	1	0.00100698	81.642	2	NFLYAWCGK(1)R	0.92793	1				1			0.938906	1.01344	1.01723	0.98535	1.01002	1.03506				1.015
Q08211	1163	K	ATP-dependent RNA helicase A OS=Homo sapiens OX=9606 GN=DHX9 PE=1 SV=4	DHX9	1	8.51134e-05	127.94	3	YGDGPRPPK(1)MAR	0.32409	9		1.02246	1.03157	1.07446	0.906094	0.965411	0.938906	1.01344	1.01723	0.98535	1.01002	1.03506		1.009	1.014	1.09	0.897	0.933	0.962	0.622211
Q08945	661	K	FACT complex subunit SSRP1 OS=Homo sapiens OX=9606 GN=SSRP1 PE=1 SV=1	SSRP1	1	0.0082193	67.507	2	QLSESFK(1)SK	1.7845	5	1.2258	1.11169	0.933527	0.888658	0.840324		1.00235	0.944282	1.02754	0.960369	0.996993	1.06847	1.223	1.177	0.909	0.925	0.843		0.801	0.185848
Q08J23	511	K	RNA cytosine C(5)-methyltransferase NSUN2 OS=Homo sapiens OX=9606 GN=NSUN2 PE=1 SV=2	NSUN2	1	0.0229039	51.456	2	MK(1)LFGFK	-0.60357	3			1.17018		0.914241	0.915576	1.04387	0.964631	1.03785	0.99952	0.960041	0.994087			1.128		0.952	0.921	0.83
Q09028	4	K	Histone-binding protein RBBP4 OS=Homo sapiens OX=9606 GN=RBBP4 PE=1 SV=3	RBBP4	1	7.72055e-06	95.138	2	ADK(1)EAAFDDAVEER	-0.43625	6	2.12684	1.50496	0.43002	1.25341	0.380755	0.304016	0.876158	1.06787	1.02841	0.897429	1.0466	1.08354	2.427	1.409	0.418	1.397	0.364	0.281	0.48	0.346024
Q09472	14	K	Histone acetyltransferase p300 OS=Homo sapiens OX=9606 GN=EP300 PE=1 SV=2	EP300	1	3.06627e-08	79.795	2	AENVVEPGPPSAK(1)RPK	-1.6812	1		1						0.954315	1.107		0.889035	1.04965		1.048
Q09666	2401	K	Neuroblast differentiation-associated protein AHNAK OS=Homo sapiens OX=9606 GN=AHNAK PE=1 SV=2	AHNAK	1	0.000737054	71.066	2	AK(1)GEVDVDVPK	0.19282	3	0.775374		0.441067	1.78356			1.06691	0.84907	1.0158	1.0931	0.87918	1.09594	0.727		0.434	1.632			2.811
Q09666	4929	K	Neuroblast differentiation-associated protein AHNAK OS=Homo sapiens OX=9606 GN=AHNAK PE=1 SV=2	AHNAK	1	0.00765519	56.202	2	APK(1)IGFSGPK	0.21464	5	1.49405	0.962402	0.779253		0.816323	0.947975	1.06691	0.84907	1.0158	1.0931	0.87918	1.09594	1.4	1.133	0.767		0.929	0.865	0.815	0.501173
Q09666	2962	K	Neuroblast differentiation-associated protein AHNAK OS=Homo sapiens OX=9606 GN=AHNAK PE=1 SV=2	AHNAK	1	0.00188635	60	3	APK(1)IPMPDFDLHLK	-0.79732	6	1.40199	0.737212	0.551172	2.12673	0.582838	0.600062	1.06691	0.84907	1.0158	1.0931	0.87918	1.09594	1.314	0.868	0.543	1.946	0.663	0.548	1.159	0.929663
Q09666	4848	K	Neuroblast differentiation-associated protein AHNAK OS=Homo sapiens OX=9606 GN=AHNAK PE=1 SV=2	AHNAK	1	0.000366755	83.214	2	APK(1)ISIPDVDLDLK	1.1871	1				1			1.06691	0.84907	1.0158	1.0931	0.87918	1.09594				0.915
Q09666	2578	K	Neuroblast differentiation-associated protein AHNAK OS=Homo sapiens OX=9606 GN=AHNAK PE=1 SV=2	AHNAK	1	2.81089e-05	112.7	2	APK(1)ISMPDFDLHLK	1.3341	10	1.3128	0.829635	0.642335	1.77251	0.720024	0.722689	1.06691	0.84907	1.0158	1.0931	0.87918	1.09594	1.23	0.977	0.632	1.622	0.819	0.659	1.092	0.894192
Q09666	2589	K	Neuroblast differentiation-associated protein AHNAK OS=Homo sapiens OX=9606 GN=AHNAK PE=1 SV=2	AHNAK	1	4.34267e-05	97.175	2	ISMPDFDLHLK(1)GPK	-0.1588	6	1.62874	0.736061	0.49862	1.9572	0.541979	0.6374	1.06691	0.84907	1.0158	1.0931	0.87918	1.09594	1.527	0.867	0.491	1.79	0.616	0.582	1.036	0.993451
Q09666	2385	K	Neuroblast differentiation-associated protein AHNAK OS=Homo sapiens OX=9606 GN=AHNAK PE=1 SV=2	AHNAK	1	0.00203642	66.953	3	APK(1)ISMPDLDLHLK	1.107	5	1.56784	0.632337		1.96145	0.250346	0.58802	1.06691	0.84907	1.0158	1.0931	0.87918	1.09594	1.47	0.745		1.794	0.285	0.537	0.787	0.566224
Q09666	1652	K	Neuroblast differentiation-associated protein AHNAK OS=Homo sapiens OX=9606 GN=AHNAK PE=1 SV=2	AHNAK	1	2.18236e-10	106.97	2	APK(1)ISMPDVDLHLK	-0.96132	13	1.2952	0.865043	0.638091	1.68501	0.722942	0.793712	1.06691	0.84907	1.0158	1.0931	0.87918	1.09594	1.214	1.019	0.628	1.541	0.822	0.724	1.079	0.865183
Q09666	945	K	Neuroblast differentiation-associated protein AHNAK OS=Homo sapiens OX=9606 GN=AHNAK PE=1 SV=2	AHNAK	1	0.0277016	54.199	3	APK(1)ISMPDVDLHMK	1.9506	1	1						1.06691	0.84907	1.0158	1.0931	0.87918	1.09594	0.937
Q09666	1322	K	Neuroblast differentiation-associated protein AHNAK OS=Homo sapiens OX=9606 GN=AHNAK PE=1 SV=2	AHNAK	1	2.01159e-07	88.734	2	APK(1)ISMPDVDLNLK	0.92362	4	1.28365		0.330914	2.12619		0.259248	1.06691	0.84907	1.0158	1.0931	0.87918	1.09594	1.203		0.326	1.945		0.237	1.427	0.953916
Q09666	1333	K	Neuroblast differentiation-associated protein AHNAK OS=Homo sapiens OX=9606 GN=AHNAK PE=1 SV=2	AHNAK	1	0.0146256	52.837	2	ISMPDVDLNLK(1)GPK	0.034901	1				1			1.06691	0.84907	1.0158	1.0931	0.87918	1.09594				0.915
Q09666	1066	K	Neuroblast differentiation-associated protein AHNAK OS=Homo sapiens OX=9606 GN=AHNAK PE=1 SV=2	AHNAK	1	4.6545e-05	94.507	2	APK(1)MSLPDVDLDLK	1.0936	6	1.48191	0.997979	0.438106	2.02738	0.523212	0.531412	1.06691	0.84907	1.0158	1.0931	0.87918	1.09594	1.389	1.175	0.431	1.855	0.595	0.485	0.98	0.877583
Q09666	1780	K	Neuroblast differentiation-associated protein AHNAK OS=Homo sapiens OX=9606 GN=AHNAK PE=1 SV=2	AHNAK	1	2.04321e-10	97.084	2	APK(1)VSMPDVDLNLK	0.17809	3	0.898439			1.10156			1.06691	0.84907	1.0158	1.0931	0.87918	1.09594	0.842			1.008			1.197
Q09666	5831	K	Neuroblast differentiation-associated protein AHNAK OS=Homo sapiens OX=9606 GN=AHNAK PE=1 SV=2	AHNAK	1	0.000982706	55.754	2	FGTFGGLGSK(1)SK	-0.025717	3		0.900861		1.41883	0.680313		1.06691	0.84907	1.0158	1.0931	0.87918	1.09594		1.061		1.298	0.774		0.976
Q09666	5833	K	Neuroblast differentiation-associated protein AHNAK OS=Homo sapiens OX=9606 GN=AHNAK PE=1 SV=2	AHNAK	1	4.47845e-08	98.328	2	SK(1)GHYEVTGSDDETGK	-0.36668	6	1.147	0.840435	1.01147	1.09723	0.723164	1.1807	1.06691	0.84907	1.0158	1.0931	0.87918	1.09594	1.075	0.99	0.996	1.004	0.823	1.077	0.949	0.529583
Q09666	5103	K	Neuroblast differentiation-associated protein AHNAK OS=Homo sapiens OX=9606 GN=AHNAK PE=1 SV=2	AHNAK	1	0.000365643	122.51	2	FK(1)AEAPLPSPK	-1.058	1				1			1.06691	0.84907	1.0158	1.0931	0.87918	1.09594				0.915
Q09666	3734	K	Neuroblast differentiation-associated protein AHNAK OS=Homo sapiens OX=9606 GN=AHNAK PE=1 SV=2	AHNAK	1	0.000952559	83.623	2	FK(1)IPEMHLK	0.90173	6	1.23705	0.768989	0.879431	1.44699	0.788424	0.879113	1.06691	0.84907	1.0158	1.0931	0.87918	1.09594	1.159	0.906	0.866	1.324	0.897	0.802	1.031	0.934601
Q09666	3741	K	Neuroblast differentiation-associated protein AHNAK OS=Homo sapiens OX=9606 GN=AHNAK PE=1 SV=2	AHNAK	1	0.000853489	72.042	2	IPEMHLK(1)APK	-0.050373	5		0.822132	0.897794	1.5547	0.560304	1.16507	1.06691	0.84907	1.0158	1.0931	0.87918	1.09594		0.968	0.884	1.422	0.637	1.063	1.124	0.844152
Q09666	4118	K	Neuroblast differentiation-associated protein AHNAK OS=Homo sapiens OX=9606 GN=AHNAK PE=1 SV=2	AHNAK	1	0.00219189	81.163	2	FK(1)MPDLHLK	0.93947	6	1.33321	0.787185	0.72512	1.57365	0.719452	0.861376	1.06691	0.84907	1.0158	1.0931	0.87918	1.09594	1.25	0.927	0.714	1.44	0.818	0.786	1.053	0.889687
Q09666	4125	K	Neuroblast differentiation-associated protein AHNAK OS=Homo sapiens OX=9606 GN=AHNAK PE=1 SV=2	AHNAK	1	0.000193725	98.009	2	MPDLHLK(1)APK	-0.63702	8	1.46496	0.481634	0.589178	1.96589	0.523002	0.975337	1.06691	0.84907	1.0158	1.0931	0.87918	1.09594	1.373	0.567	0.58	1.798	0.595	0.89	1.303	0.598052
Q09666	1911	K	Neuroblast differentiation-associated protein AHNAK OS=Homo sapiens OX=9606 GN=AHNAK PE=1 SV=2	AHNAK	1	0.000338505	90.761	2	FK(1)MPDMHFK	-0.89628	7	1.28783	0.820056	0.826274	1.3586	0.780582	0.926654	1.06691	0.84907	1.0158	1.0931	0.87918	1.09594	1.207	0.966	0.813	1.243	0.888	0.846	0.997	0.977461
Q09666	1918	K	Neuroblast differentiation-associated protein AHNAK OS=Homo sapiens OX=9606 GN=AHNAK PE=1 SV=2	AHNAK	1	0.00605559	69.915	2	MPDMHFK(1)APK	-0.03743	4	0.879164		0.955754	1.16508			1.06691	0.84907	1.0158	1.0931	0.87918	1.09594	0.824		0.941	1.066			1.208
Q09666	3532	K	Neuroblast differentiation-associated protein AHNAK OS=Homo sapiens OX=9606 GN=AHNAK PE=1 SV=2	AHNAK	1	0.0373484	48.157	2	FK(1)MPDMNIK	2.3415	1	1						1.06691	0.84907	1.0158	1.0931	0.87918	1.09594	0.937
Q09666	4508	K	Neuroblast differentiation-associated protein AHNAK OS=Homo sapiens OX=9606 GN=AHNAK PE=1 SV=2	AHNAK	1	0.00145182	76.605	2	FK(1)MPDVHFK	0.090767	6	1.25281	0.852877	0.856185	1.4064	0.781936	0.849799	1.06691	0.84907	1.0158	1.0931	0.87918	1.09594	1.174	1.004	0.843	1.287	0.889	0.775	0.977	0.842581
Q09666	4838	K	Neuroblast differentiation-associated protein AHNAK OS=Homo sapiens OX=9606 GN=AHNAK PE=1 SV=2	AHNAK	1	0.00163639	93.467	2	FK(1)MPEINIK	-0.44244	5	1.49918	0.563744		1.54113		0.395955	1.06691	0.84907	1.0158	1.0931	0.87918	1.09594	1.405	0.664		1.41		0.361	0.856	0.734399
Q09666	4845	K	Neuroblast differentiation-associated protein AHNAK OS=Homo sapiens OX=9606 GN=AHNAK PE=1 SV=2	AHNAK	1	0.00151633	74.269	2	MPEINIK(1)APK	0.28173	3	0.72552		0.718688	1.55579			1.06691	0.84907	1.0158	1.0931	0.87918	1.09594	0.68		0.708	1.423			2.05
Q09666	1184	K	Neuroblast differentiation-associated protein AHNAK OS=Homo sapiens OX=9606 GN=AHNAK PE=1 SV=2	AHNAK	1	0.000346192	100.84	2	FK(1)MPEMHFK	-0.42423	9	1.27148	0.832854	0.837491	1.38704	0.794583	0.876548	1.06691	0.84907	1.0158	1.0931	0.87918	1.09594	1.192	0.981	0.824	1.269	0.904	0.8	0.992	0.93031
Q09666	1191	K	Neuroblast differentiation-associated protein AHNAK OS=Homo sapiens OX=9606 GN=AHNAK PE=1 SV=2	AHNAK	1	0.000273145	109.88	2	MPEMHFK(1)TPK	0.42539	10	1.11915		1.33844	1.1435	0.401122	0.99779	1.06691	0.84907	1.0158	1.0931	0.87918	1.09594	1.049		1.318	1.046	0.456	0.91	0.679	0.288551
Q09666	1056	K	Neuroblast differentiation-associated protein AHNAK OS=Homo sapiens OX=9606 GN=AHNAK PE=1 SV=2	AHNAK	1	0.000339491	121.67	2	FK(1)MPEMHFR	-0.48407	6	1.26543	0.693268		1.5457	0.609426	0.886173	1.06691	0.84907	1.0158	1.0931	0.87918	1.09594	1.186	0.817		1.414	0.693	0.809	0.971	0.856073
Q09666	807	K	Neuroblast differentiation-associated protein AHNAK OS=Homo sapiens OX=9606 GN=AHNAK PE=1 SV=2	AHNAK	1	0.000290515	158.61	2	FK(1)MPEMNIK	0.97733	9	1.68983	0.574443	0.839536	1.68973	0.560234	0.64623	1.06691	0.84907	1.0158	1.0931	0.87918	1.09594	1.584	0.677	0.826	1.546	0.637	0.59	0.898	0.744129
Q09666	1440	K	Neuroblast differentiation-associated protein AHNAK OS=Homo sapiens OX=9606 GN=AHNAK PE=1 SV=2	AHNAK	1	0.00145613	110.88	2	FK(1)MPEMSIK	0.056793	9	1.56473	0.825756	0.603101	1.72866	0.496417	0.78133	1.06691	0.84907	1.0158	1.0931	0.87918	1.09594	1.467	0.973	0.594	1.581	0.565	0.713	0.942	0.826089
Q09666	1450	K	Neuroblast differentiation-associated protein AHNAK OS=Homo sapiens OX=9606 GN=AHNAK PE=1 SV=2	AHNAK	1	2.42966e-14	142.73	3	PQK(1)ISIPDVGLHLK	-1.313	8	1.16438		0.435008	1.40061			1.06691	0.84907	1.0158	1.0931	0.87918	1.09594	1.091		0.428	1.281			1.687
Q09666	1568	K	Neuroblast differentiation-associated protein AHNAK OS=Homo sapiens OX=9606 GN=AHNAK PE=1 SV=2	AHNAK	1	5.28889e-06	156.57	2	FK(1)MPSMNIQTHK	0.07264	6	1.55087		0.714631			0.734496	1.06691	0.84907	1.0158	1.0931	0.87918	1.09594	1.454		0.704			0.67	0.621
Q09666	3363	K	Neuroblast differentiation-associated protein AHNAK OS=Homo sapiens OX=9606 GN=AHNAK PE=1 SV=2	AHNAK	1	1.50501e-12	100.69	2	FNFSGSK(1)VQTPEVDVK	-0.38972	5		1.32146	0.649238	1.14192	1.12746	0.759924	1.06691	0.84907	1.0158	1.0931	0.87918	1.09594		1.556	0.639	1.045	1.282	0.693	0.917	0.960344
Q09666	5235	K	Neuroblast differentiation-associated protein AHNAK OS=Homo sapiens OX=9606 GN=AHNAK PE=1 SV=2	AHNAK	1	0.0243721	49.96	2	FPK(1)FSMPK	1.1998	4			0.994591	1.1034	0.773524	1.12848	1.06691	0.84907	1.0158	1.0931	0.87918	1.09594			0.979	1.009	0.88	1.03	0.994
Q09666	5240	K	Neuroblast differentiation-associated protein AHNAK OS=Homo sapiens OX=9606 GN=AHNAK PE=1 SV=2	AHNAK	1	0.0757941	43.168	2	FSMPK(1)IGIPGVK	-1.5353	1				1			1.06691	0.84907	1.0158	1.0931	0.87918	1.09594				0.915
Q09666	5772	K	Neuroblast differentiation-associated protein AHNAK OS=Homo sapiens OX=9606 GN=AHNAK PE=1 SV=2	AHNAK	1	0.0130629	67.903	2	FSLFK(1)SK	-0.30589	3			1.07672	1.37034	0.552939		1.06691	0.84907	1.0158	1.0931	0.87918	1.09594			1.06	1.254	0.629		0.888
Q09666	2987	K	Neuroblast differentiation-associated protein AHNAK OS=Homo sapiens OX=9606 GN=AHNAK PE=1 SV=2	AHNAK	1	0.000160716	77.157	2	GDVDISLPK(1)VEGDLK	-1.1451	1				1			1.06691	0.84907	1.0158	1.0931	0.87918	1.09594				0.915
Q09666	3769	K	Neuroblast differentiation-associated protein AHNAK OS=Homo sapiens OX=9606 GN=AHNAK PE=1 SV=2	AHNAK	1	0.00154634	77.157	2	GDVDVSLPK(1)MEGDLK	-0.5282	1				1			1.06691	0.84907	1.0158	1.0931	0.87918	1.09594				0.915
Q09666	2603	K	Neuroblast differentiation-associated protein AHNAK OS=Homo sapiens OX=9606 GN=AHNAK PE=1 SV=2	AHNAK	1	0.00110874	68.108	2	GDVDVSLPK(1)VEGDLK	-1.2642	4			0.398154	2.26387	0.716546	0.621435	1.06691	0.84907	1.0158	1.0931	0.87918	1.09594			0.392	2.071	0.815	0.567	2.936
Q09666	3695	K	Neuroblast differentiation-associated protein AHNAK OS=Homo sapiens OX=9606 GN=AHNAK PE=1 SV=2	AHNAK	1	0.00635888	42.446	2	GDVVVSLPK(1)VEGDLK	-0.22703	1				1			1.06691	0.84907	1.0158	1.0931	0.87918	1.09594				0.915
Q09666	5528	K	Neuroblast differentiation-associated protein AHNAK OS=Homo sapiens OX=9606 GN=AHNAK PE=1 SV=2	AHNAK	1	0.00160592	46.528	3	GGLK(1)GSEVGFHGAAPDISVK	1.2254	1				1			1.06691	0.84907	1.0158	1.0931	0.87918	1.09594				0.915
Q09666	5725	K	Neuroblast differentiation-associated protein AHNAK OS=Homo sapiens OX=9606 GN=AHNAK PE=1 SV=2	AHNAK	1	2.09624e-18	146.34	2	GK(1)GGVTGSPEASISGSK	0.73189	6	1.07301	0.865055	0.8431	1.34726	0.798628	1.07295	1.06691	0.84907	1.0158	1.0931	0.87918	1.09594	1.006	1.019	0.83	1.233	0.908	0.979	1.093	0.498216
Q09666	5443	K	Neuroblast differentiation-associated protein AHNAK OS=Homo sapiens OX=9606 GN=AHNAK PE=1 SV=2	AHNAK	1	1.24897e-05	85.622	2	GPGVDVNLK(1)GPR	0.13607	3		1.19748	0.905692		0.896827		1.06691	0.84907	1.0158	1.0931	0.87918	1.09594		1.41	0.892		1.02		0.886
Q09666	2493	K	Neuroblast differentiation-associated protein AHNAK OS=Homo sapiens OX=9606 GN=AHNAK PE=1 SV=2	AHNAK	1	2.04778e-08	104.86	3	GPK(1)VDVNAPDVQAPDWHLK	-1.284	1				1			1.06691	0.84907	1.0158	1.0931	0.87918	1.09594				0.915
Q09666	537	K	Neuroblast differentiation-associated protein AHNAK OS=Homo sapiens OX=9606 GN=AHNAK PE=1 SV=2	AHNAK	1	0.000835206	85.716	2	GPQVALK(1)GSR	0.20011	6	1.42029	0.731008	0.907168	1.50841	0.647605	0.785524	1.06691	0.84907	1.0158	1.0931	0.87918	1.09594	1.331	0.861	0.893	1.38	0.737	0.717	0.919	0.68105
Q09666	5612	K	Neuroblast differentiation-associated protein AHNAK OS=Homo sapiens OX=9606 GN=AHNAK PE=1 SV=2	AHNAK	1	1.90014e-16	112.49	3	GPQVSSALNLDTSK(1)FAGGLHFSGPK	1.3743	1				1			1.06691	0.84907	1.0158	1.0931	0.87918	1.09594				0.915
Q09666	3275	K	Neuroblast differentiation-associated protein AHNAK OS=Homo sapiens OX=9606 GN=AHNAK PE=1 SV=2	AHNAK	1	0.00307686	41.499	3	IDVDAPDIDIHGPDAK(1)LK	0.1726	1				1			1.06691	0.84907	1.0158	1.0931	0.87918	1.09594				0.915
Q09666	2327	K	Neuroblast differentiation-associated protein AHNAK OS=Homo sapiens OX=9606 GN=AHNAK PE=1 SV=2	AHNAK	1	0.00452931	66.664	2	IK(1)GDVDVSAPK	0.95101	1					1		1.06691	0.84907	1.0158	1.0931	0.87918	1.09594					1.137
Q09666	1461	K	Neuroblast differentiation-associated protein AHNAK OS=Homo sapiens OX=9606 GN=AHNAK PE=1 SV=2	AHNAK	1	3.68395e-07	86.243	2	ISIPDVGLHLK(1)GPK	-0.49112	7	1.54549	0.821093	0.512699	1.72131	0.632715	0.766691	1.06691	0.84907	1.0158	1.0931	0.87918	1.09594	1.449	0.967	0.505	1.575	0.72	0.7	1.025	0.929354
Q09666	1205	K	Neuroblast differentiation-associated protein AHNAK OS=Homo sapiens OX=9606 GN=AHNAK PE=1 SV=2	AHNAK	1	3.63175e-05	108.2	2	ISMPDVDLHLK(1)GPK	0.90072	10	1.97938	0.90853	0.518858	1.40739	0.616629	0.569216	1.06691	0.84907	1.0158	1.0931	0.87918	1.09594	1.855	1.07	0.511	1.288	0.701	0.519	0.73	0.605137
Q09666	1589	K	Neuroblast differentiation-associated protein AHNAK OS=Homo sapiens OX=9606 GN=AHNAK PE=1 SV=2	AHNAK	1	0.000626862	88.24	2	ISMPDVGLNLK(1)APK	-2.2424	3		0.84461		1.56162		0.593769	1.06691	0.84907	1.0158	1.0931	0.87918	1.09594		0.995		1.429		0.542	0.99
Q09666	2194	K	Neuroblast differentiation-associated protein AHNAK OS=Homo sapiens OX=9606 GN=AHNAK PE=1 SV=2	AHNAK	1	0.00356637	86.243	2	ISMPDVNLNLK(1)GPK	-0.10461	2	1.00705			0.992945			1.06691	0.84907	1.0158	1.0931	0.87918	1.09594	0.944			0.908			0.962
Q09666	128	K	Neuroblast differentiation-associated protein AHNAK OS=Homo sapiens OX=9606 GN=AHNAK PE=1 SV=2	AHNAK	1	0.000838363	147.16	2	IYTTK(1)IKPR	0.15341	6	0.956679	0.897191	1.0061	0.940861	0.934328	1.26484	1.06691	0.84907	1.0158	1.0931	0.87918	1.09594	0.897	1.057	0.99	0.861	1.063	1.154	1.046	0.712606
Q09666	4977	K	Neuroblast differentiation-associated protein AHNAK OS=Homo sapiens OX=9606 GN=AHNAK PE=1 SV=2	AHNAK	0.797023	0.0019941	90.308	2	K(0.797)PK(0.203)FGFGAK	-0.52524	2				1.1597	0.840299		1.06691	0.84907	1.0158	1.0931	0.87918	1.09594				1.061	0.956
Q09666	4979	K	Neuroblast differentiation-associated protein AHNAK OS=Homo sapiens OX=9606 GN=AHNAK PE=1 SV=2	AHNAK	1	0.00550547	84.368	2	PK(1)FGFGAK	1.6153	5	1.04601	0.938154	0.982984			1.03285	1.06691	0.84907	1.0158	1.0931	0.87918	1.09594	0.98	1.105	0.968			0.942	0.926
Q09666	563	K	Neuroblast differentiation-associated protein AHNAK OS=Homo sapiens OX=9606 GN=AHNAK PE=1 SV=2	AHNAK	1	0.000585461	92.445	2	LGSPSGK(1)TGTCR	-0.066893	2	1.37616		0.623842				1.06691	0.84907	1.0158	1.0931	0.87918	1.09594	1.29		0.614
Q09666	5821	K	Neuroblast differentiation-associated protein AHNAK OS=Homo sapiens OX=9606 GN=AHNAK PE=1 SV=2	AHNAK	1	0.000111247	83.214	2	LK(1)FGTFGGLGSK	-0.70208	6	0.790898	0.927432	0.995347	1.2074	0.930095	1.14883	1.06691	0.84907	1.0158	1.0931	0.87918	1.09594	0.741	1.092	0.98	1.105	1.058	1.048	1.141	0.28175
Q09666	3308	K	Neuroblast differentiation-associated protein AHNAK OS=Homo sapiens OX=9606 GN=AHNAK PE=1 SV=2	AHNAK	1	0.000824406	72.365	2	LK(1)GDVDVSGPK	1.2429	5		0.89848	0.679322	1.61055	0.848177	0.963467	1.06691	0.84907	1.0158	1.0931	0.87918	1.09594		1.058	0.669	1.473	0.965	0.879	1.28	0.422919
Q09666	1338	K	Neuroblast differentiation-associated protein AHNAK OS=Homo sapiens OX=9606 GN=AHNAK PE=1 SV=2	AHNAK	1	0.0011189	61.23	2	LK(1)GDVDVSLPEVEGEMK	-1.1498	1				1			1.06691	0.84907	1.0158	1.0931	0.87918	1.09594				0.915
Q09666	1796	K	Neuroblast differentiation-associated protein AHNAK OS=Homo sapiens OX=9606 GN=AHNAK PE=1 SV=2	AHNAK	1	2.00973e-08	69.224	2	LK(1)GEIDASVPELEGDLR	-1.4784	3	0.723601	0.722916		1.55348			1.06691	0.84907	1.0158	1.0931	0.87918	1.09594	0.678	0.851		1.421			1.859
Q09666	2106	K	Neuroblast differentiation-associated protein AHNAK OS=Homo sapiens OX=9606 GN=AHNAK PE=1 SV=2	AHNAK	1	0.000346192	100.84	2	LK(1)MPEMHFK	0.46747	5	1.28405	0.765808	0.759815	1.3625		0.827824	1.06691	0.84907	1.0158	1.0931	0.87918	1.09594	1.204	0.902	0.748	1.246		0.755	1.052	0.890389
Q09666	2568	K	Neuroblast differentiation-associated protein AHNAK OS=Homo sapiens OX=9606 GN=AHNAK PE=1 SV=2	AHNAK	1	0.0389972	43.734	2	LK(1)MPEMNIK	0.47666	1				1			1.06691	0.84907	1.0158	1.0931	0.87918	1.09594				0.915
Q09666	134	K	Neuroblast differentiation-associated protein AHNAK OS=Homo sapiens OX=9606 GN=AHNAK PE=1 SV=2	AHNAK	1	5.25134e-45	175.38	2	LK(1)SEDGVEGDLGETQSR	-0.73355	6	1.6062	0.700474	0.638639	1.88824	0.57621	0.590239	1.06691	0.84907	1.0158	1.0931	0.87918	1.09594	1.505	0.825	0.629	1.727	0.655	0.539	0.987	0.861238
Q09666	1594	K	Neuroblast differentiation-associated protein AHNAK OS=Homo sapiens OX=9606 GN=AHNAK PE=1 SV=2	AHNAK	1	0.000285257	65.879	2	LK(1)TDVDVSLPK	-0.28238	6	0.506779	0.986309	0.39439	2.62348		0.489043	1.06691	0.84907	1.0158	1.0931	0.87918	1.09594	0.475	1.162	0.388	2.4		0.446	2.108	0.524875
Q09666	1777	K	Neuroblast differentiation-associated protein AHNAK OS=Homo sapiens OX=9606 GN=AHNAK PE=1 SV=2	AHNAK	1	0.0393632	61.494	2	LNIK(1)APK	0.18053	2	1.15449			0.845509			1.06691	0.84907	1.0158	1.0931	0.87918	1.09594	1.082			0.773			0.714
Q09666	1280	K	Neuroblast differentiation-associated protein AHNAK OS=Homo sapiens OX=9606 GN=AHNAK PE=1 SV=2	AHNAK	1	0.00120742	71.896	2	LPK(1)ADIDVSGPK	0.16687	4	1.07922			1.69489	0.579161	0.646728	1.06691	0.84907	1.0158	1.0931	0.87918	1.09594	1.012			1.551	0.659	0.59	0.922
Q09666	1408	K	Neuroblast differentiation-associated protein AHNAK OS=Homo sapiens OX=9606 GN=AHNAK PE=1 SV=2	AHNAK	1	0.000658106	71.896	2	LPK(1)ADVDVSGPK	0.89686	4	1.4458		0.87173		0.804279	0.878187	1.06691	0.84907	1.0158	1.0931	0.87918	1.09594	1.355		0.858		0.915	0.801	0.775	0.434603
Q09666	3356	K	Neuroblast differentiation-associated protein AHNAK OS=Homo sapiens OX=9606 GN=AHNAK PE=1 SV=2	AHNAK	1	0.000317921	111.61	2	LPK(1)FNFSGSK	-0.13961	6	0.963738	0.876337	0.988989	1.20097	0.894942	1.07502	1.06691	0.84907	1.0158	1.0931	0.87918	1.09594	0.903	1.032	0.974	1.099	1.018	0.981	1.065	0.283248
Q09666	5858	K	Neuroblast differentiation-associated protein AHNAK OS=Homo sapiens OX=9606 GN=AHNAK PE=1 SV=2	AHNAK	1	6.91325e-05	94.791	2	LQGSGVSLASK(1)K	0.24992	6	1.21992	0.850517	0.861423	1.29722	0.853047	0.917866	1.06691	0.84907	1.0158	1.0931	0.87918	1.09594	1.143	1.002	0.848	1.187	0.97	0.838	1.001	0.98768
Q09666	3686	K	Neuroblast differentiation-associated protein AHNAK OS=Homo sapiens OX=9606 GN=AHNAK PE=1 SV=2	AHNAK	1	0.00035647	79.889	2	MK(1)GDVVVSLPK	-1.6006	4	1.24557		0.472485	1.76249		0.51945	1.06691	0.84907	1.0158	1.0931	0.87918	1.09594	1.167		0.465	1.612		0.474	1.278	0.843916
Q09666	1466	K	Neuroblast differentiation-associated protein AHNAK OS=Homo sapiens OX=9606 GN=AHNAK PE=1 SV=2	AHNAK	1	0.000790255	81.799	2	MK(1)GDYDVTVPK	2.0525	7	1.34278		0.768577	1.6277	0.571877	0.689063	1.06691	0.84907	1.0158	1.0931	0.87918	1.09594	1.259		0.757	1.489	0.65	0.629	0.915	0.753174
Q09666	632	K	Neuroblast differentiation-associated protein AHNAK OS=Homo sapiens OX=9606 GN=AHNAK PE=1 SV=2	AHNAK	1	0.0059412	51.872	2	MK(1)MPTFSTPGAK	1.2964	2			0.824534	1.17547			1.06691	0.84907	1.0158	1.0931	0.87918	1.09594			0.812	1.075			1.324
Q09666	1319	K	Neuroblast differentiation-associated protein AHNAK OS=Homo sapiens OX=9606 GN=AHNAK PE=1 SV=2	AHNAK	1	0.000314059	95.311	2	MPEMHFK(1)APK	-0.12169	6	0.720609	0.185651		2.65372		0.440018	1.06691	0.84907	1.0158	1.0931	0.87918	1.09594	0.675	0.219		2.428		0.401	3.164	0.468403
Q09666	1194	K	Neuroblast differentiation-associated protein AHNAK OS=Homo sapiens OX=9606 GN=AHNAK PE=1 SV=2	AHNAK	1	1.15212e-07	102.57	2	TPK(1)ISMPDVDLHLK	0.064168	5	1.74678	0.608388	0.453499	1.58799		0.603351	1.06691	0.84907	1.0158	1.0931	0.87918	1.09594	1.637	0.717	0.446	1.453		0.551	1.074	0.874653
Q09666	942	K	Neuroblast differentiation-associated protein AHNAK OS=Homo sapiens OX=9606 GN=AHNAK PE=1 SV=2	AHNAK	1	0.00162321	69.915	2	MPEMNIK(1)APK	0.25385	9		0.718503	0.596078	1.73594	0.84147	1.10801	1.06691	0.84907	1.0158	1.0931	0.87918	1.09594		0.846	0.587	1.588	0.957	1.011	1.654	0.140793
Q09666	5716	K	Neuroblast differentiation-associated protein AHNAK OS=Homo sapiens OX=9606 GN=AHNAK PE=1 SV=2	AHNAK	1	0.00134434	110.22	2	MPK(1)FNFSK	-0.045918	12	1.03062	0.802973	1.08435	1.24848	0.809733	1.02384	1.06691	0.84907	1.0158	1.0931	0.87918	1.09594	0.966	0.946	1.067	1.142	0.921	0.934	1.006	0.976329
Q09666	884	K	Neuroblast differentiation-associated protein AHNAK OS=Homo sapiens OX=9606 GN=AHNAK PE=1 SV=2	AHNAK	1	0.000193299	121.8	2	MPK(1)FSMPGFK	0.12593	20	1.26682	0.79442	1.02933	1.29619	0.816532	0.796704	1.06691	0.84907	1.0158	1.0931	0.87918	1.09594	1.187	0.936	1.013	1.186	0.929	0.727	0.906	0.51174
Q09666	1005	K	Neuroblast differentiation-associated protein AHNAK OS=Homo sapiens OX=9606 GN=AHNAK PE=1 SV=2	AHNAK	1	0.000193772	118.91	2	MPK(1)FSMPSLK	-0.86772	9	1.39844	0.593019	1.1938	1.2917	0.730772	0.792271	1.06691	0.84907	1.0158	1.0931	0.87918	1.09594	1.311	0.698	1.175	1.182	0.831	0.723	0.859	0.600259
Q09666	756	K	Neuroblast differentiation-associated protein AHNAK OS=Homo sapiens OX=9606 GN=AHNAK PE=1 SV=2	AHNAK	1	0.00120527	83.438	2	MPK(1)FSVPGFK	-0.11965	6	1.52768	0.5886	0.987802	1.39155	0.652243	0.852129	1.06691	0.84907	1.0158	1.0931	0.87918	1.09594	1.432	0.693	0.972	1.273	0.742	0.778	0.902	0.755244
Q09666	3481	K	Neuroblast differentiation-associated protein AHNAK OS=Homo sapiens OX=9606 GN=AHNAK PE=1 SV=2	AHNAK	1	0.0317658	40.386	2	MPK(1)FSVSGLK	0.45968	1				1			1.06691	0.84907	1.0158	1.0931	0.87918	1.09594				0.915
Q09666	5027	K	Neuroblast differentiation-associated protein AHNAK OS=Homo sapiens OX=9606 GN=AHNAK PE=1 SV=2	AHNAK	1	0.0449763	65.933	2	MPK(1)IHMSGPK	-1.7979	1				1			1.06691	0.84907	1.0158	1.0931	0.87918	1.09594				0.915
Q09666	2773	K	Neuroblast differentiation-associated protein AHNAK OS=Homo sapiens OX=9606 GN=AHNAK PE=1 SV=2	AHNAK	1	0.000656444	83.358	2	MPK(1)ISMPGFK	-0.093397	8	1.28301	0.792691	1.00022	1.31747	0.81417	0.792439	1.06691	0.84907	1.0158	1.0931	0.87918	1.09594	1.203	0.934	0.985	1.205	0.926	0.723	0.914	0.560902
Q09666	2311	K	Neuroblast differentiation-associated protein AHNAK OS=Homo sapiens OX=9606 GN=AHNAK PE=1 SV=2	AHNAK	1	0.00096887	81.48	2	TPK(1)ISMPDVDFNLK	-2.7571	2	0.749811			1.25019			1.06691	0.84907	1.0158	1.0931	0.87918	1.09594	0.703			1.144			1.627
Q09666	2183	K	Neuroblast differentiation-associated protein AHNAK OS=Homo sapiens OX=9606 GN=AHNAK PE=1 SV=2	AHNAK	1	0.000165508	99.276	2	TPK(1)ISMPDVNLNLK	-4.2767	1				1			1.06691	0.84907	1.0158	1.0931	0.87918	1.09594				0.915
Q09666	1561	K	Neuroblast differentiation-associated protein AHNAK OS=Homo sapiens OX=9606 GN=AHNAK PE=1 SV=2	AHNAK	1	0.000174627	73.305	2	VDIDVPDVNLEAPEGK(1)LK	-0.83398	1				1			1.06691	0.84907	1.0158	1.0931	0.87918	1.09594				0.915
Q09666	1177	K	Neuroblast differentiation-associated protein AHNAK OS=Homo sapiens OX=9606 GN=AHNAK PE=1 SV=2	AHNAK	1	0.000334733	65.173	2	VDIEAPDVSLEGPEGK(1)LK	-1.546	1				1			1.06691	0.84907	1.0158	1.0931	0.87918	1.09594				0.915
Q09666	2561	K	Neuroblast differentiation-associated protein AHNAK OS=Homo sapiens OX=9606 GN=AHNAK PE=1 SV=2	AHNAK	1	4.32283e-06	86.135	2	VDIEGPDVNIEGPEGK(1)LK	0.30008	6	1.73147	1.18253	0.551222	1.53717	0.481682	0.515919	1.06691	0.84907	1.0158	1.0931	0.87918	1.09594	1.623	1.393	0.543	1.406	0.548	0.471	0.681	0.448512
Q09666	3397	K	Neuroblast differentiation-associated protein AHNAK OS=Homo sapiens OX=9606 GN=AHNAK PE=1 SV=2	AHNAK	1	0.00278204	90.156	2	VDINAPDVEVQGK(1)VK	-0.087943	1				1			1.06691	0.84907	1.0158	1.0931	0.87918	1.09594				0.915
Q09666	1049	K	Neuroblast differentiation-associated protein AHNAK OS=Homo sapiens OX=9606 GN=AHNAK PE=1 SV=2	AHNAK	1	1.92001e-05	96.27	2	VDTNAPDLSLEGPEGK(1)LK	0.27009	5	1.75473	0.788303	0.296767	1.79771		0.362493	1.06691	0.84907	1.0158	1.0931	0.87918	1.09594	1.645	0.928	0.292	1.645		0.331	1.035	0.971339
Q09666	2945	K	Neuroblast differentiation-associated protein AHNAK OS=Homo sapiens OX=9606 GN=AHNAK PE=1 SV=2	AHNAK	1	0.000431504	70.552	2	VDVEGPDVNIEGPEGK(1)LK	-0.76905	1				1			1.06691	0.84907	1.0158	1.0931	0.87918	1.09594				0.915
Q09666	1305	K	Neuroblast differentiation-associated protein AHNAK OS=Homo sapiens OX=9606 GN=AHNAK PE=1 SV=2	AHNAK	1	2.24362e-10	85.081	2	VDVEVPDVSLEGPEGK(1)LK	-0.22281	6	0.83178	0.993569	0.768867	2.19841	0.501787	0.705592	1.06691	0.84907	1.0158	1.0931	0.87918	1.09594	0.78	1.17	0.757	2.011	0.571	0.644	1.192	0.959988
Q09666	1870	K	Neuroblast differentiation-associated protein AHNAK OS=Homo sapiens OX=9606 GN=AHNAK PE=1 SV=2	AHNAK	1	0.0590769	55.754	2	VK(1)GDADVSVPK	0.83245	1				1			1.06691	0.84907	1.0158	1.0931	0.87918	1.09594				0.915
Q09666	4864	K	Neuroblast differentiation-associated protein AHNAK OS=Homo sapiens OX=9606 GN=AHNAK PE=1 SV=2	AHNAK	1	0.0285546	60	2	VK(1)GDFDVSVPK	2.3108	2				1.56998		0.430015	1.06691	0.84907	1.0158	1.0931	0.87918	1.09594				1.436		0.392
Q09666	3430	K	Neuroblast differentiation-associated protein AHNAK OS=Homo sapiens OX=9606 GN=AHNAK PE=1 SV=2	AHNAK	1	0.00119185	53.773	2	VK(1)GDLDIAGPNLEGDFK	-1.6789	1				1			1.06691	0.84907	1.0158	1.0931	0.87918	1.09594				0.915
Q09666	3106	K	Neuroblast differentiation-associated protein AHNAK OS=Homo sapiens OX=9606 GN=AHNAK PE=1 SV=2	AHNAK	1	0.00156914	66.664	2	VK(1)GDMDVSLPK	-0.072207	2	0.851197			1.1488			1.06691	0.84907	1.0158	1.0931	0.87918	1.09594	0.798			1.051			1.317
Q09666	1668	K	Neuroblast differentiation-associated protein AHNAK OS=Homo sapiens OX=9606 GN=AHNAK PE=1 SV=2	AHNAK	1	0.000721307	110.52	2	VK(1)GDMDVSVPK	0.23678	6	1.23955	0.63218	0.711039	1.80283	0.797949	0.816454	1.06691	0.84907	1.0158	1.0931	0.87918	1.09594	1.162	0.745	0.7	1.649	0.908	0.745	1.267	0.517918
Q09666	2978	K	Neuroblast differentiation-associated protein AHNAK OS=Homo sapiens OX=9606 GN=AHNAK PE=1 SV=2	AHNAK	1	0.0289076	50.09	2	VK(1)GDVDISLPK	-0.31054	1				1			1.06691	0.84907	1.0158	1.0931	0.87918	1.09594				0.915
Q09666	2132	K	Neuroblast differentiation-associated protein AHNAK OS=Homo sapiens OX=9606 GN=AHNAK PE=1 SV=2	AHNAK	1	0.000356889	92.445	2	VK(1)GDVDVSLPK	-0.093457	5		0.833782	0.678542	1.69727	0.879744	0.910664	1.06691	0.84907	1.0158	1.0931	0.87918	1.09594		0.982	0.668	1.553	1.001	0.831	1.368	0.366466
Q09666	1210	K	Neuroblast differentiation-associated protein AHNAK OS=Homo sapiens OX=9606 GN=AHNAK PE=1 SV=2	AHNAK	1	0.00108895	84.309	2	VK(1)GDVDVSVPK	0.61093	7	1.54294	0.542777	0.745906	1.58203	0.586354		1.06691	0.84907	1.0158	1.0931	0.87918	1.09594	1.446	0.639	0.734	1.447	0.667		1.125	0.814043
Q09666	712	K	Neuroblast differentiation-associated protein AHNAK OS=Homo sapiens OX=9606 GN=AHNAK PE=1 SV=2	AHNAK	1	0.000770213	67.548	2	VK(1)GEYDVTVPK	-0.14048	2	0.761344			1.23866			1.06691	0.84907	1.0158	1.0931	0.87918	1.09594	0.714			1.133			1.587
Q09666	584	K	Neuroblast differentiation-associated protein AHNAK OS=Homo sapiens OX=9606 GN=AHNAK PE=1 SV=2	AHNAK	1	0.000997369	79.311	2	VK(1)GGVDVTLPR	0.39981	3				1.90409	0.52455	0.571362	1.06691	0.84907	1.0158	1.0931	0.87918	1.09594				1.742	0.597	0.521
Q09666	5144	K	Neuroblast differentiation-associated protein AHNAK OS=Homo sapiens OX=9606 GN=AHNAK PE=1 SV=2	AHNAK	1	0.00539735	54.584	2	VK(1)MPDVDISVPK	-0.97956	1	1						1.06691	0.84907	1.0158	1.0931	0.87918	1.09594	0.937
Q09666	599	K	Neuroblast differentiation-associated protein AHNAK OS=Homo sapiens OX=9606 GN=AHNAK PE=1 SV=2	AHNAK	1	0.00696692	56.378	2	VK(1)VPEVDVR	0.83436	2				1.4201		0.579903	1.06691	0.84907	1.0158	1.0931	0.87918	1.09594				1.299		0.529
Q09666	679	K	Neuroblast differentiation-associated protein AHNAK OS=Homo sapiens OX=9606 GN=AHNAK PE=1 SV=2	AHNAK	1	0.00108425	66.485	2	VNVEAPDVNLEGLGGK(1)LK	-1.2727	1				1			1.06691	0.84907	1.0158	1.0931	0.87918	1.09594				0.915
Q09666	1360	K	Neuroblast differentiation-associated protein AHNAK OS=Homo sapiens OX=9606 GN=AHNAK PE=1 SV=2	AHNAK	1	0.00491048	74.269	2	VPDVDIK(1)GPK	0.13563	3			0.522882	1.94087	0.536249		1.06691	0.84907	1.0158	1.0931	0.87918	1.09594			0.515	1.776	0.61		2.317
Q09666	313	K	Neuroblast differentiation-associated protein AHNAK OS=Homo sapiens OX=9606 GN=AHNAK PE=1 SV=2	AHNAK	1	0.00122117	85.622	2	VPK(1)FGVSTGR	0.16628	6	1.462	0.686977	0.847775	1.18384	0.745025	1.07438	1.06691	0.84907	1.0158	1.0931	0.87918	1.09594	1.37	0.809	0.835	1.083	0.847	0.98	0.965	0.960738
Q09666	438	K	Neuroblast differentiation-associated protein AHNAK OS=Homo sapiens OX=9606 GN=AHNAK PE=1 SV=2	AHNAK	1	0.000908644	106.35	2	VPK(1)FSVSGAK	-0.65771	6	1.14837	0.81899	0.873481	1.27279	0.863578	1.02278	1.06691	0.84907	1.0158	1.0931	0.87918	1.09594	1.076	0.965	0.86	1.164	0.982	0.933	1.061	0.559265
Q09666	817	K	Neuroblast differentiation-associated protein AHNAK OS=Homo sapiens OX=9606 GN=AHNAK PE=1 SV=2	AHNAK	1	0.00030987	58.313	3	VPK(1)ISMPDVDLHLK	0.16749	6	1.37216	0.714678	0.646411	1.839	0.427755		1.06691	0.84907	1.0158	1.0931	0.87918	1.09594	1.286	0.842	0.636	1.682	0.487		1.177	0.966064
Q09666	341	K	Neuroblast differentiation-associated protein AHNAK OS=Homo sapiens OX=9606 GN=AHNAK PE=1 SV=2	AHNAK	1	2.1917e-10	127.03	2	VSAPEVSVGHK(1)GGK	0.27119	6	1.6166	0.891517	0.747051	1.41994	0.734174	0.590714	1.06691	0.84907	1.0158	1.0931	0.87918	1.09594	1.515	1.05	0.735	1.299	0.835	0.539	0.81	0.520962
Q09666	530	K	Neuroblast differentiation-associated protein AHNAK OS=Homo sapiens OX=9606 GN=AHNAK PE=1 SV=2	AHNAK	1	4.50518e-15	107.6	2	VSAPGVQGDVK(1)GPQVALK	-2.4173	1				1			1.06691	0.84907	1.0158	1.0931	0.87918	1.09594				0.915
Q09666	4926	K	Neuroblast differentiation-associated protein AHNAK OS=Homo sapiens OX=9606 GN=AHNAK PE=1 SV=2	AHNAK	1	1.97886e-05	71.219	2	VTAPDVDLHLK(1)APK	-0.38019	2				1.52221		0.477789	1.06691	0.84907	1.0158	1.0931	0.87918	1.09594				1.393		0.436
Q10570	1326	K	Cleavage and polyadenylation specificity factor subunit 1 OS=Homo sapiens OX=9606 GN=CPSF1 PE=1 SV=2	CPSF1	1	0.000609718	118.06	2	K(1)SVVWENK	1.0913	6	1.10189	0.955413	0.727716	1.37341	0.867317	0.974257	0.995257	0.985577	0.99994	1.05973	0.970449	0.989044	1.107	0.969	0.728	1.296	0.894	0.985	1.132	0.48929
Q12789	521	K	General transcription factor 3C polypeptide 1 OS=Homo sapiens OX=9606 GN=GTF3C1 PE=1 SV=4	GTF3C1	1	4.39037e-05	126.82	2	GGWK(1)VVNLHPLK	-0.79453	5	0.945207	0.827957	1.17531	1.22689		0.824635	0.949089	1.02852	0.988663	0.957252	1.05444	1.02203	0.996	0.805	1.189	1.282		0.807	1.048	0.893249
Q12789	529	K	General transcription factor 3C polypeptide 1 OS=Homo sapiens OX=9606 GN=GTF3C1 PE=1 SV=4	GTF3C1	1	0.000338129	90.308	2	VVNLHPLK(1)K	0.2608	6	1.07799	0.863551	0.936619	1.40131	0.864515	0.856009	0.949089	1.02852	0.988663	0.957252	1.05444	1.02203	1.136	0.84	0.947	1.464	0.82	0.838	1.068	0.872455
Q12789	324	K	General transcription factor 3C polypeptide 1 OS=Homo sapiens OX=9606 GN=GTF3C1 PE=1 SV=4	GTF3C1	1	0.00108436	74.486	2	K(1)GTDVMVR	1.9472	2		1.30004			0.699964		0.949089	1.02852	0.988663	0.957252	1.05444	1.02203		1.264			0.664		0.525
Q12789	517	K	General transcription factor 3C polypeptide 1 OS=Homo sapiens OX=9606 GN=GTF3C1 PE=1 SV=4	GTF3C1	1	3.19391e-05	106.11	3	TQPHHSTPTK(1)GGWK	1.0092	7	1.14161	0.841099	0.864161	1.55186	0.761689	0.839583	0.949089	1.02852	0.988663	0.957252	1.05444	1.02203	1.203	0.818	0.874	1.621	0.722	0.821	1.093	0.90061
Q12830	1545	K	Nucleosome-remodeling factor subunit BPTF OS=Homo sapiens OX=9606 GN=BPTF PE=1 SV=3	BPTF	1	0.0147698	56.378	2	IYLK(1)GECLK	1.4972	4		0.977522	0.948645	1.34122	0.732617		0.732315	1.08326	1.112	1.02034	1.06708	0.985011		0.902	0.853	1.314	0.687		1.14	0.828967
Q12830	791	K	Nucleosome-remodeling factor subunit BPTF OS=Homo sapiens OX=9606 GN=BPTF PE=1 SV=3	BPTF	1	0.000207814	43.518	3	LSQLK(1)SQQVAAAAHEANK	1.0815	1			1				0.732315	1.08326	1.112	1.02034	1.06708	0.985011			0.899
Q12830	786	K	Nucleosome-remodeling factor subunit BPTF OS=Homo sapiens OX=9606 GN=BPTF PE=1 SV=3	BPTF	1	0.000314653	87.895	2	NPDSK(1)LSQLK	0.53369	5		0.914142	0.951777	1.25171	0.902556	0.979813	0.732315	1.08326	1.112	1.02034	1.06708	0.985011		0.844	0.856	1.227	0.846	0.995	1.203	0.301028
Q12873	295	K	Chromodomain-helicase-DNA-binding protein 3 OS=Homo sapiens OX=9606 GN=CHD3 PE=1 SV=3	CHD3	1	0.00323011	65.313	2	IK(1)LGLLGGK	-1.0595	6	1.1681	0.838433	0.832484	1.54443	0.791192	0.825362	1.02844	0.855438	0.988573	1.21001	0.936095	0.981444	1.136	0.98	0.842	1.276	0.845	0.841	1.001	0.949148
Q12873	48	K	Chromodomain-helicase-DNA-binding protein 3 OS=Homo sapiens OX=9606 GN=CHD3 PE=1 SV=3	CHD3	1	0.0318508	49.96	2	LLPSALGVK(1)K	-0.46703	2	0.746057			1.25394			1.02844	0.855438	0.988573	1.21001	0.936095	0.981444	0.725			1.036			1.429
Q12874	303	K	Splicing factor 3A subunit 3 OS=Homo sapiens OX=9606 GN=SF3A3 PE=1 SV=1	SF3A3	1	0.00390196	61.194	2	SLESLDTSLFAK(1)NPK	0.73938	1				1			1.00566	0.948646	1.02842	1.04163	0.969188	1.00647				0.96
Q12888	1626	K	TP53-binding protein 1 OS=Homo sapiens OX=9606 GN=TP53BP1 PE=1 SV=2	TP53BP1	1	9.39479e-11	154.94	2	AADISLDNLVEGK(1)R	-0.66948	3	1.03928	0.78486		1.17586			0.954514	1.00003	1.02435	1.02173	0.981456	1.01791	1.089	0.785		1.151			1.228
Q12888	1340	K	TP53-binding protein 1 OS=Homo sapiens OX=9606 GN=TP53BP1 PE=1 SV=2	TP53BP1	1	7.07117e-09	103.17	2	GK(1)TSGTEPADFALPSSR	-0.4512	2		1.22639	0.773612				0.954514	1.00003	1.02435	1.02173	0.981456	1.01791		1.226	0.755
[truncated: 1,434 more rows]
